# Supplementary material for: Splicing factor SRSF1 is essential for homing of precursor spermatogonial stem cells in mice
Source: eLife journal article supplement (doi:10.7554/elife.89316), 2023-08-08

Figure 7B

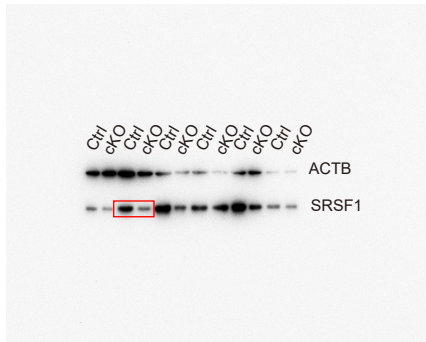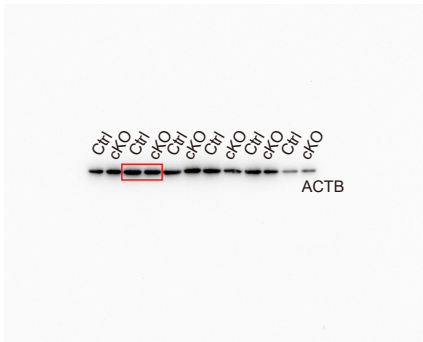

Supplement: fig7-data1 [file elife-89316-fig7-data1-v1.pdf]
