# Supplementary material for: Splicing factor SRSF1 is essential for homing of precursor spermatogonial stem cells in mice
Source: eLife journal article supplement (doi:10.7554/elife.89316), 2023-08-08
Supplement: fig9-data2 [file elife-89316-fig9-data2-v1.pdf]

# Figure 9G

HA-SART1    FLAG-SRSF1

IP: FLAG    IP: HA

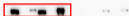

WB: HA

HA-SART1    HA-RBM15  
FLAG-SRSF1    FLAG-SRSF1

IP: FLAG    IP: HA    IP: FLAG    IP: HA

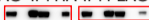

WB: FLAG

HA-RBM15    FLAG-SRSF1

IP: FLAG    IP: HA

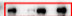

WB: HA

HA-SRSF10    FLAG-SRSF1

IP: FLAG    IP: HA

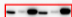

WB: HA

HA-SRSF10    FLAG-SRSF1

IP: FLAG    IP: HA

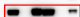

WB: FLAG
