# Supplementary material for: Splicing factor SRSF1 is essential for homing of precursor spermatogonial stem cells in mice
Source: eLife. 2024 Jan 25;12:RP89316. doi: 10.7554/eLife.89316 (PMC10945694; doi:10.7554/eLife.89316)
Supplement: Supplementary file 1. [file elife-89316-supp1.xlsx]

## Sheet: Sheet1
Supplementary File 1 SRSF1 peak-containing genes identified through CLIP-seq.
GeneID	geneSymbol	GeneID	geneSymbol
ENSMUSG00000000028	Cdc45	ENSMUSG00000037487	Ubr5
ENSMUSG00000000037	Scml2	ENSMUSG00000037519	Ppfia1
ENSMUSG00000000125	Wnt3	ENSMUSG00000037531	Mrpl47
ENSMUSG00000000127	Fer	ENSMUSG00000037533	Rapgef6
ENSMUSG00000000131	Xpo6	ENSMUSG00000037536	Fbxo34
ENSMUSG00000000282	Mnt	ENSMUSG00000037608	Bclaf1
ENSMUSG00000000339	Rtca	ENSMUSG00000037617	Spag1
ENSMUSG00000000365	Rnf17	ENSMUSG00000037622	Wdtc1
ENSMUSG00000000399	Ndufa9	ENSMUSG00000037624	Kcnk2
ENSMUSG00000000411	Tssk3	ENSMUSG00000037627	Rgs22
ENSMUSG00000000420	Galnt1	ENSMUSG00000037628	Cdkn3
ENSMUSG00000000563	Atp5pb	ENSMUSG00000037683	Armc3
ENSMUSG00000000568	Hnrnpd	ENSMUSG00000037689	Tmem247
ENSMUSG00000000605	Clcn4	ENSMUSG00000037697	Ddhd1
ENSMUSG00000000631	Myo18a	ENSMUSG00000037716	Ccdc33
ENSMUSG00000000738	Spg7	ENSMUSG00000037736	Limch1
ENSMUSG00000000740	Rpl13	ENSMUSG00000037742	Eef1a1
ENSMUSG00000000787	Ddx3x	ENSMUSG00000037787	Coa8
ENSMUSG00000000794	Kcnn3	ENSMUSG00000037801	Iqch
ENSMUSG00000000804	Usp32	ENSMUSG00000037808	Fam76b
ENSMUSG00000000811	Txnrd3	ENSMUSG00000037852	Cpe
ENSMUSG00000000823	Zfp512b	ENSMUSG00000037857	Nufip2
ENSMUSG00000000838	Fmr1	ENSMUSG00000037876	Jmjd1c
ENSMUSG00000000915	Hip1r	ENSMUSG00000037894	H2az1
ENSMUSG00000001016	Ilf2	ENSMUSG00000037926	Ssh2
ENSMUSG00000001017	Chtop	ENSMUSG00000037933	Bicd2
ENSMUSG00000001052	Sec24b	ENSMUSG00000037935	Smarce1
ENSMUSG00000001089	Luzp1	ENSMUSG00000037958	Nsrp1
ENSMUSG00000001105	Ift20	ENSMUSG00000037971	1110032A03Rik
ENSMUSG00000001120	Pcbp3	ENSMUSG00000037979	Ccdc92
ENSMUSG00000001151	Pcnt	ENSMUSG00000037993	Dhx38
ENSMUSG00000001156	Mxd1	ENSMUSG00000037999	Arap2
ENSMUSG00000001158	Snrnp27	ENSMUSG00000038002	Cramp1
ENSMUSG00000001175	Calm1	ENSMUSG00000038010	Ccdc138
ENSMUSG00000001211	Agpat3	ENSMUSG00000038011	Dnah10
ENSMUSG00000001228	Uhrf1	ENSMUSG00000038015	Prm2
ENSMUSG00000001247	Lsr	ENSMUSG00000038022	Mindy4
ENSMUSG00000001248	Gramd1a	ENSMUSG00000038025	Phf2
ENSMUSG00000001289	Pfdn5	ENSMUSG00000038026	Kcnj9
ENSMUSG00000001305	Rrp15	ENSMUSG00000038039	Gcc2
ENSMUSG00000001366	Fbxo9	ENSMUSG00000038042	Ptpdc1
ENSMUSG00000001383	Zmat2	ENSMUSG00000038056	Kmt2c
ENSMUSG00000001415	Smg5	ENSMUSG00000038057	Dbil5
ENSMUSG00000001416	Cct3	ENSMUSG00000038069	Cdkn2aip
ENSMUSG00000001435	Col18a1	ENSMUSG00000038070	Cntln
ENSMUSG00000001440	Kpnb1	ENSMUSG00000038084	Opa1
ENSMUSG00000001467	Cyp51	ENSMUSG00000038085	Cnbd2
ENSMUSG00000001472	Tcf25	ENSMUSG00000038095	Sbno1
ENSMUSG00000001525	Tubb5	ENSMUSG00000038116	Phf20
ENSMUSG00000001542	Ell2	ENSMUSG00000038126	Mphosph9
ENSMUSG00000001558	Klhl10	ENSMUSG00000038127	Ccdc50
ENSMUSG00000001569	Nom1	ENSMUSG00000038128	Camk4
ENSMUSG00000001632	Brpf1	ENSMUSG00000038143	Stox2
ENSMUSG00000001666	Ddt	ENSMUSG00000038165	1700022A21Rik
ENSMUSG00000001674	Ddx18	ENSMUSG00000038170	Pde4dip
ENSMUSG00000001687	Ubl3	ENSMUSG00000038180	Spag4
ENSMUSG00000001767	Crnkl1	ENSMUSG00000038187	Btbd10
ENSMUSG00000001783	Rtcb	ENSMUSG00000038199	Iqca1l
ENSMUSG00000001794	Capns1	ENSMUSG00000038240	Pdss2
ENSMUSG00000001829	Clpb	ENSMUSG00000038241	Cep250
ENSMUSG00000001833	Septin7	ENSMUSG00000038244	Mical2
ENSMUSG00000001910	Nacc1	ENSMUSG00000038246	Fam50b
ENSMUSG00000001948	Spa17	ENSMUSG00000038252	Ncapd2
ENSMUSG00000002017	Fam98a	ENSMUSG00000038271	Iffo1
ENSMUSG00000002031	Ift46	ENSMUSG00000038274	Fau
ENSMUSG00000002052	Supt6	ENSMUSG00000038279	Nop2
ENSMUSG00000002055	Spag5	ENSMUSG00000038290	Smg6
ENSMUSG00000002076	Hsf2bp	ENSMUSG00000093815	None
ENSMUSG00000002102	Psmc3	ENSMUSG00000038292	Ccdc155
ENSMUSG00000002107	Celf2	ENSMUSG00000038298	Pdzk1
ENSMUSG00000002129	Sf3a1	ENSMUSG00000038335	Tsr1
ENSMUSG00000002190	Clgn	ENSMUSG00000038344	Txlng
ENSMUSG00000002210	Smg9	ENSMUSG00000038351	Sgsm2
ENSMUSG00000002265	Peg3	ENSMUSG00000038366	Lasp1
ENSMUSG00000002307	Daxx	ENSMUSG00000038369	Ncoa6
ENSMUSG00000002308	Cd320	ENSMUSG00000038371	Sbf2
ENSMUSG00000002319	Ipo4	ENSMUSG00000038374	Rbm8a
ENSMUSG00000002324	Rec8	ENSMUSG00000038384	Setd1b
ENSMUSG00000002372	Ranbp3	ENSMUSG00000038388	Pals2
ENSMUSG00000002409	Dyrk1b	ENSMUSG00000038398	Upf3a
ENSMUSG00000002413	Braf	ENSMUSG00000038406	Scaf1
ENSMUSG00000002428	Hltf	ENSMUSG00000038408	1700018A04Rik
ENSMUSG00000002455	Prpf6	ENSMUSG00000038437	Mllt6
ENSMUSG00000002486	Tchp	ENSMUSG00000038453	Srcin1
ENSMUSG00000002489	Tiam1	ENSMUSG00000038467	Chmp4b
ENSMUSG00000002524	Puf60	ENSMUSG00000038481	Cdk19
ENSMUSG00000002546	Golga2	ENSMUSG00000038495	Otud7b
ENSMUSG00000002608	Ccdc97	ENSMUSG00000038503	Mesd
ENSMUSG00000002625	Akap8l	ENSMUSG00000038510	Rpf2
ENSMUSG00000002658	Gtf2f1	ENSMUSG00000038518	Jarid2
ENSMUSG00000002732	Fkbp7	ENSMUSG00000038523	1700003F12Rik
ENSMUSG00000002748	Baz1b	ENSMUSG00000038535	Zfp280d
ENSMUSG00000002768	Mea1	ENSMUSG00000038538	Ubn2
ENSMUSG00000002833	Hdgfl2	ENSMUSG00000038546	Ranbp9
ENSMUSG00000002835	Chaf1a	ENSMUSG00000038564	Ift172
ENSMUSG00000002948	Map2k7	ENSMUSG00000038587	Akap12
ENSMUSG00000002949	Timm44	ENSMUSG00000038594	Cep85l
ENSMUSG00000002985	Apoe	ENSMUSG00000038611	Phrf1
ENSMUSG00000002996	Hbp1	ENSMUSG00000038615	Nfe2l1
ENSMUSG00000003033	Ap1m1	ENSMUSG00000038619	Ensa
ENSMUSG00000003037	Rab8a	ENSMUSG00000038637	Lrrc56
ENSMUSG00000003039	Fam32a	ENSMUSG00000038664	Herc1
ENSMUSG00000003068	Stk11	ENSMUSG00000038668	Lpar1
ENSMUSG00000003119	Cdk12	ENSMUSG00000038683	Pak1ip1
ENSMUSG00000003123	Lipe	ENSMUSG00000038690	Atp5j2
ENSMUSG00000003134	Tbc1d8	ENSMUSG00000038691	Mbd3l1
ENSMUSG00000003153	Slc2a3	ENSMUSG00000038696	Mapkap1
ENSMUSG00000003184	Irf3	ENSMUSG00000038708	Golga4
ENSMUSG00000003200	Sh3gl1	ENSMUSG00000038722	bud31
ENSMUSG00000003226	Ranbp2	ENSMUSG00000038729	Pakap
ENSMUSG00000003234	Abcf3	ENSMUSG00000038733	Wdr26
ENSMUSG00000003235	Eif2b5	ENSMUSG00000038759	Nup205
ENSMUSG00000003269	Cyth2	ENSMUSG00000038762	Abcf1
ENSMUSG00000003316	Glg1	ENSMUSG00000038766	Gabpb2
ENSMUSG00000003341	Atp8b3	ENSMUSG00000038774	Ascc3
ENSMUSG00000003345	Csnk1g2	ENSMUSG00000038776	Ephx1
ENSMUSG00000003354	Ccdc65	ENSMUSG00000038784	Cnot4
ENSMUSG00000003360	Ddx23	ENSMUSG00000038797	Zscan2
ENSMUSG00000003402	Prkcsh	ENSMUSG00000038806	Sde2
ENSMUSG00000003421	Nosip	ENSMUSG00000038836	Agbl3
ENSMUSG00000003423	Pih1d1	ENSMUSG00000038844	Kif16b
ENSMUSG00000003429	Rps11	ENSMUSG00000038866	Zcchc2
ENSMUSG00000003435	Supt5	ENSMUSG00000038871	Bpgm
ENSMUSG00000003437	Paf1	ENSMUSG00000038895	Zfp653
ENSMUSG00000003527	Ess2	ENSMUSG00000038900	Rpl12
ENSMUSG00000003531	Dgcr6	ENSMUSG00000038909	Kat7
ENSMUSG00000003604	Aven	ENSMUSG00000038914	Dido1
ENSMUSG00000003660	Snrnp200	ENSMUSG00000038925	E330034G19Rik
ENSMUSG00000003731	Kpna6	ENSMUSG00000038932	Tcfl5
ENSMUSG00000003778	Brd8	ENSMUSG00000038943	Prc1
ENSMUSG00000003779	Kif20a	ENSMUSG00000038967	Pdk2
ENSMUSG00000003810	Mast2	ENSMUSG00000038973	Cldnd2
ENSMUSG00000003814	Calr	ENSMUSG00000038976	Ppp1r9b
ENSMUSG00000003824	Syce2	ENSMUSG00000038987	Cfap157
ENSMUSG00000003847	Nfat5	ENSMUSG00000038994	H1f9
ENSMUSG00000003923	Tfam	ENSMUSG00000038997	Asb17
ENSMUSG00000003970	Rpl8	ENSMUSG00000039007	Cpq
ENSMUSG00000004032	Gstm5	ENSMUSG00000039031	Arhgap18
ENSMUSG00000004040	Stat3	ENSMUSG00000039033	Tasp1
ENSMUSG00000004070	Hmox2	ENSMUSG00000039047	Pigk
ENSMUSG00000004096	Cwc15	ENSMUSG00000039050	Osbpl2
ENSMUSG00000004099	Dnmt1	ENSMUSG00000039067	Psmd7
ENSMUSG00000004127	Trmt10a	ENSMUSG00000039068	Zzz3
ENSMUSG00000004207	Psap	ENSMUSG00000039099	Wdr93
ENSMUSG00000004347	Pde1c	ENSMUSG00000039100	Marchf6
ENSMUSG00000004364	Cul3	ENSMUSG00000039103	Nexn
ENSMUSG00000004455	Ppp1cc	ENSMUSG00000039105	Atp6v1g1
ENSMUSG00000004460	Dnajb11	ENSMUSG00000039110	Mycbpap
ENSMUSG00000004508	Gab2	ENSMUSG00000039148	Sart1
ENSMUSG00000004535	Tax1bp1	ENSMUSG00000039156	Stim2
ENSMUSG00000004591	Pkn2	ENSMUSG00000039159	Ube2h
ENSMUSG00000004610	Etfb	ENSMUSG00000039166	Akap7
ENSMUSG00000004637	Wwox	ENSMUSG00000039168	Dap
ENSMUSG00000004642	Slbp	ENSMUSG00000039176	Polg
ENSMUSG00000004667	Polr2e	ENSMUSG00000039179	Tekt5
ENSMUSG00000004771	Rab11a	ENSMUSG00000039187	Fanci
ENSMUSG00000004798	Ulk2	ENSMUSG00000039205	Ciz1
ENSMUSG00000004843	Chmp2b	ENSMUSG00000039210	Gpatch2
ENSMUSG00000004865	Srpk1	ENSMUSG00000039218	Srrm2
ENSMUSG00000004895	Prcc	ENSMUSG00000039219	Arid4b
ENSMUSG00000004897	Hdgf	ENSMUSG00000039220	Ppp1r10
ENSMUSG00000004929	Thop1	ENSMUSG00000039224	D1Pas1
ENSMUSG00000004980	Hnrnpa2b1	ENSMUSG00000039254	Pomt1
ENSMUSG00000005045	Chd5	ENSMUSG00000039262	Prrc2b
ENSMUSG00000005102	Eif2ak4	ENSMUSG00000039286	Fndc3b
ENSMUSG00000005103	Wdr1	ENSMUSG00000039298	Cdk5rap2
ENSMUSG00000005131	4930550C14Rik	ENSMUSG00000039330	Tsga10ip
ENSMUSG00000005198	Polr2a	ENSMUSG00000039335	Spata16
ENSMUSG00000005237	Dnah2	ENSMUSG00000039391	Ccdc81
ENSMUSG00000005299	Letm1	ENSMUSG00000039396	Neil3
ENSMUSG00000005362	Crbn	ENSMUSG00000039449	Prpf18
ENSMUSG00000005370	Msh6	ENSMUSG00000039456	Morc3
ENSMUSG00000005371	Fbxo11	ENSMUSG00000039473	Ubn1
ENSMUSG00000005374	Tbl2	ENSMUSG00000039477	Tnrc18
ENSMUSG00000005417	Mprip	ENSMUSG00000039492	Ccdc27
ENSMUSG00000005474	Myl10	ENSMUSG00000039501	Znfx1
ENSMUSG00000005481	Ddx39a	ENSMUSG00000039523	Cep104
ENSMUSG00000005483	Dnajb1	ENSMUSG00000039530	Tusc3
ENSMUSG00000005566	Trim28	ENSMUSG00000039531	Zup1
ENSMUSG00000005575	Ube2m	ENSMUSG00000039536	Stau1
ENSMUSG00000005609	Ctr9	ENSMUSG00000039540	4921524L21Rik
ENSMUSG00000005610	Eif4g2	ENSMUSG00000039543	Cfap70
ENSMUSG00000005615	Pcyt1a	ENSMUSG00000039555	Cylc2
ENSMUSG00000005625	Psmd4	ENSMUSG00000039585	Myo9a
ENSMUSG00000005687	Bcas2	ENSMUSG00000039615	Stub1
ENSMUSG00000005698	Ctcf	ENSMUSG00000039629	Strip2
ENSMUSG00000005732	Ranbp1	ENSMUSG00000039630	Hnrnpu
ENSMUSG00000005803	Sqor	ENSMUSG00000039632	Odad3
ENSMUSG00000005823	Gpr108	ENSMUSG00000039660	Spout1
ENSMUSG00000005881	Ergic3	ENSMUSG00000039684	Gm5422
ENSMUSG00000005882	Uqcc1	ENSMUSG00000039703	Nploc4
ENSMUSG00000005886	Ncoa2	ENSMUSG00000039704	Lmbrd2
ENSMUSG00000005936	Kctd20	ENSMUSG00000039716	Dock3
ENSMUSG00000005981	Trap1	ENSMUSG00000039735	Fnbp1l
ENSMUSG00000005983	1700037C18Rik	ENSMUSG00000039737	Prkrip1
ENSMUSG00000006005	Tpr	ENSMUSG00000039738	Slx4
ENSMUSG00000006024	Napa	ENSMUSG00000039742	Garin1b
ENSMUSG00000006058	Snf8	ENSMUSG00000039756	Dnttip2
ENSMUSG00000006169	Clint1	ENSMUSG00000039763	Dnajc28
ENSMUSG00000006191	Cdkal1	ENSMUSG00000039781	Cep131
ENSMUSG00000006215	Zbtb17	ENSMUSG00000039782	Cpeb2
ENSMUSG00000006276	Eps15l1	ENSMUSG00000039801	Cplane1
ENSMUSG00000006299	Aamp	ENSMUSG00000039804	Ncoa5
ENSMUSG00000006307	Kmt2b	ENSMUSG00000039828	Wdr70
ENSMUSG00000006310	Zbtb32	ENSMUSG00000039831	Arhgap29
ENSMUSG00000006333	Rps9	ENSMUSG00000039852	Rere
ENSMUSG00000006335	Tfpt	ENSMUSG00000039879	Heca
ENSMUSG00000006527	Sfmbt1	ENSMUSG00000039891	Txlnb
ENSMUSG00000006576	Slc4a3	ENSMUSG00000039943	Plcb4
ENSMUSG00000006599	Gtf2h1	ENSMUSG00000039953	Clstn1
ENSMUSG00000006676	Usp19	ENSMUSG00000039958	Etfbkmt
ENSMUSG00000006715	Gmnn	ENSMUSG00000039959	Hip1
ENSMUSG00000006740	Kif5b	ENSMUSG00000039963	Ccdc40
ENSMUSG00000006784	Odad4	ENSMUSG00000039977	Deup1
ENSMUSG00000006906	Stambp	ENSMUSG00000039990	Edrf1
ENSMUSG00000006930	Hap1	ENSMUSG00000040003	Magi2
ENSMUSG00000006932	Ctnnb1	ENSMUSG00000040013	Fkbp6
ENSMUSG00000006941	Eif1b	ENSMUSG00000040040	Ift88
ENSMUSG00000006998	Psmd2	ENSMUSG00000040054	Baz2a
ENSMUSG00000007029	Vars	ENSMUSG00000040084	Bub1b
ENSMUSG00000007033	Hspa1l	ENSMUSG00000040097	Flywch1
ENSMUSG00000007035	Msh5	ENSMUSG00000040111	Gramd1b
ENSMUSG00000007080	Pole	ENSMUSG00000040123	Zmym5
ENSMUSG00000007097	Atp1a2	ENSMUSG00000040140	Tdrd6
ENSMUSG00000007107	Atp1a4	ENSMUSG00000040174	Alkbh3
ENSMUSG00000007122	Casq1	ENSMUSG00000040195	Nemp1
ENSMUSG00000007440	Pcdha10	ENSMUSG00000040219	Ttc12
ENSMUSG00000007656	Arpp19	ENSMUSG00000040220	Gas8
ENSMUSG00000007721	Ccdc124	ENSMUSG00000040225	Prrc2c
ENSMUSG00000007739	Cct4	ENSMUSG00000040231	Syngr4
ENSMUSG00000007827	Ankrd26	ENSMUSG00000040242	Fgfr1op2
ENSMUSG00000007836	Hnrnpa0	ENSMUSG00000040249	Lrp1
ENSMUSG00000007850	Hnrnph1	ENSMUSG00000040250	Ints13
ENSMUSG00000007867	Ift43	ENSMUSG00000040260	Daam2
ENSMUSG00000007907	Cabs1	ENSMUSG00000040263	Klhdc4
ENSMUSG00000008028	1700008O03Rik	ENSMUSG00000040265	Dnm3
ENSMUSG00000008200	Fnbp4	ENSMUSG00000040269	Mrps28
ENSMUSG00000008301	Phax	ENSMUSG00000040276	Pacsin1
ENSMUSG00000008307	1700109H08Rik	ENSMUSG00000040297	Suco
ENSMUSG00000008333	Snrpb2	ENSMUSG00000040312	Cchcr1
ENSMUSG00000008348	Ubc	ENSMUSG00000040325	Dcaf1
ENSMUSG00000008373	Prpf31	ENSMUSG00000040351	Ankib1
ENSMUSG00000008429	Herpud2	ENSMUSG00000040359	Ufl1
ENSMUSG00000008575	Nfib	ENSMUSG00000040364	Sec1
ENSMUSG00000008683	Rps15a	ENSMUSG00000040365	Trim41
ENSMUSG00000008690	Ncaph2	ENSMUSG00000040370	Etfrf1
ENSMUSG00000008730	Hipk1	ENSMUSG00000040383	Aqr
ENSMUSG00000008763	Man1a2	ENSMUSG00000040390	Map3k10
ENSMUSG00000008822	Acyp1	ENSMUSG00000040407	Akap9
ENSMUSG00000008859	Rala	ENSMUSG00000040412	Elapor1
ENSMUSG00000008958	Vps72	ENSMUSG00000040414	Slc25a28
ENSMUSG00000008976	Gabpa	ENSMUSG00000040420	Cdh18
ENSMUSG00000009013	Dynll1	ENSMUSG00000040423	Rc3h1
ENSMUSG00000009030	Pdcl	ENSMUSG00000040451	Sgms1
ENSMUSG00000009073	Nf2	ENSMUSG00000040459	Arglu1
ENSMUSG00000009079	Ewsr1	ENSMUSG00000040462	Os9
ENSMUSG00000009093	Gstt4	ENSMUSG00000040463	Mybbp1a
ENSMUSG00000009470	Tnpo1	ENSMUSG00000040473	Cfap69
ENSMUSG00000009549	Srp14	ENSMUSG00000040481	Bptf
ENSMUSG00000009575	Cbx5	ENSMUSG00000040489	Sox30
ENSMUSG00000009596	Taf7l	ENSMUSG00000040524	Zfp609
ENSMUSG00000009628	Tex15	ENSMUSG00000040541	Tmem225
ENSMUSG00000009630	Ppp2cb	ENSMUSG00000040548	Tex2
ENSMUSG00000009670	Tex11	ENSMUSG00000040549	Ckap5
ENSMUSG00000009734	Pou6f2	ENSMUSG00000040550	Otud6b
ENSMUSG00000009741	Ubp1	ENSMUSG00000040562	Gstm2
ENSMUSG00000009907	Vps4b	ENSMUSG00000040565	Btaf1
ENSMUSG00000009927	Rps25	ENSMUSG00000040591	Cstpp1
ENSMUSG00000009941	Nxf2	ENSMUSG00000040629	Mael
ENSMUSG00000010044	Zmynd10	ENSMUSG00000040640	Erc2
ENSMUSG00000010095	Slc3a2	ENSMUSG00000040649	Rimklb
ENSMUSG00000010097	Nxf1	ENSMUSG00000040651	Tasor
ENSMUSG00000010136	Pifo	ENSMUSG00000040659	Efhd2
ENSMUSG00000010277	2610507B11Rik	ENSMUSG00000040661	Rad54l2
ENSMUSG00000010342	Tex14	ENSMUSG00000040667	Nup88
ENSMUSG00000010362	Rdm1	ENSMUSG00000040690	Col16a1
ENSMUSG00000010376	Nedd8	ENSMUSG00000040720	Virma
ENSMUSG00000010392	Gosr1	ENSMUSG00000040725	Hnrnpul1
ENSMUSG00000010406	Mrpl52	ENSMUSG00000040729	Cep126
ENSMUSG00000010435	Spaca7	ENSMUSG00000040731	Eif4h
ENSMUSG00000010453	Kansl3	ENSMUSG00000040761	Spen
ENSMUSG00000010505	Myt1	ENSMUSG00000040782	Cop1
ENSMUSG00000010608	Rbm25	ENSMUSG00000040785	Ttc3
ENSMUSG00000010755	Cars	ENSMUSG00000040795	Iqcc
ENSMUSG00000010796	Asz1	ENSMUSG00000040812	Agbl2
ENSMUSG00000011154	Cfap161	ENSMUSG00000040813	Tex264
ENSMUSG00000011158	Brf1	ENSMUSG00000040824	Snrpd2
ENSMUSG00000011306	Sugp1	ENSMUSG00000040829	Zmynd15
ENSMUSG00000011349	Dmrtc2	ENSMUSG00000040838	Gm11639
ENSMUSG00000011350	Gm5893	ENSMUSG00000040850	Psme4
ENSMUSG00000011751	Sptbn4	ENSMUSG00000040852	Plekhh2
ENSMUSG00000011831	Evi5	ENSMUSG00000040859	Bsdc1
ENSMUSG00000011832	Evi5l	ENSMUSG00000040860	Crocc
ENSMUSG00000011877	Git1	ENSMUSG00000040866	Rsph6a
ENSMUSG00000011958	Bnip2	ENSMUSG00000040875	Osbpl10
ENSMUSG00000012076	Brms1l	ENSMUSG00000040888	Gfer
ENSMUSG00000012126	Ubxn11	ENSMUSG00000040919	4930505A04Rik
ENSMUSG00000012211	Tex22	ENSMUSG00000040936	Ulk4
ENSMUSG00000012296	Tjap1	ENSMUSG00000041009	Iqcf4
ENSMUSG00000012443	Kif11	ENSMUSG00000041020	Map7d2
ENSMUSG00000012609	Ttll5	ENSMUSG00000041028	Ghitm
ENSMUSG00000013076	Amotl1	ENSMUSG00000041057	Wdr43
ENSMUSG00000013091	Tmem190	ENSMUSG00000041096	Tspyl2
ENSMUSG00000013155	Enkd1	ENSMUSG00000041112	Elmo1
ENSMUSG00000013236	Ptprs	ENSMUSG00000041133	Smc1a
ENSMUSG00000013663	Pten	ENSMUSG00000041141	Pnma8a
ENSMUSG00000013787	Ehmt2	ENSMUSG00000041144	Dnah7b
ENSMUSG00000014074	Rnf168	ENSMUSG00000041161	Otud3
ENSMUSG00000014077	Chp1	ENSMUSG00000041164	Zmiz2
ENSMUSG00000014195	Dnajc7	ENSMUSG00000041168	Lonp1
ENSMUSG00000014226	Cacybp	ENSMUSG00000041180	Hectd2
ENSMUSG00000014232	Cluap1	ENSMUSG00000041203	Trir
ENSMUSG00000014426	Map3k4	ENSMUSG00000041219	Arhgap11a
ENSMUSG00000014504	Srp19	ENSMUSG00000041225	Arhgap12
ENSMUSG00000014551	Mrps25	ENSMUSG00000041229	Phf8
ENSMUSG00000014668	Chfr	ENSMUSG00000041236	Vps41
ENSMUSG00000014782	Plekhg4	ENSMUSG00000041238	Rbbp8
ENSMUSG00000014850	Msh3	ENSMUSG00000041245	Wnk3
ENSMUSG00000014905	Dnajb9	ENSMUSG00000041255	Tmco5b
ENSMUSG00000014956	Ppp1cb	ENSMUSG00000041268	Dmxl2
ENSMUSG00000015002	Efr3a	ENSMUSG00000041278	Ttc1
ENSMUSG00000015087	Rabl6	ENSMUSG00000041297	Cdk13
ENSMUSG00000015090	Ptgds	ENSMUSG00000041298	Katnal1
ENSMUSG00000015092	Edf1	ENSMUSG00000041301	Cftr
ENSMUSG00000015095	Fbxw5	ENSMUSG00000041303	Gtf3c3
ENSMUSG00000015120	Ube2i	ENSMUSG00000041323	Ak7
ENSMUSG00000015149	Sirt2	ENSMUSG00000041328	Pcf11
ENSMUSG00000015165	Hnrnpl	ENSMUSG00000041343	Ankrd42
ENSMUSG00000015176	Nolc1	ENSMUSG00000041353	Tmem29
ENSMUSG00000015217	Hmgb3	ENSMUSG00000041360	Pum3
ENSMUSG00000015222	Map2	ENSMUSG00000041361	Myzap
ENSMUSG00000015243	Abca1	ENSMUSG00000041362	Shtn1
ENSMUSG00000015305	Sash1	ENSMUSG00000041375	Ccdc9
ENSMUSG00000015357	Clpx	ENSMUSG00000041408	Wapl
ENSMUSG00000015365	Mov10l1	ENSMUSG00000041453	Rpl21
ENSMUSG00000015597	Zfp318	ENSMUSG00000041459	Tardbp
ENSMUSG00000015599	Ttbk1	ENSMUSG00000041536	Serpina3a
ENSMUSG00000015656	Hspa8	ENSMUSG00000041540	Sox5
ENSMUSG00000015672	Mrpl32	ENSMUSG00000041556	Fbxo2
ENSMUSG00000015697	Setdb1	ENSMUSG00000041560	Nop53
ENSMUSG00000015733	Capza2	ENSMUSG00000041565	L3mbtl4
ENSMUSG00000015748	Prpf3	ENSMUSG00000041566	Tssk1
ENSMUSG00000015749	Anp32e	ENSMUSG00000041570	Camsap2
ENSMUSG00000015757	Ppil4	ENSMUSG00000041596	Nlrp5-ps
ENSMUSG00000015804	Med28	ENSMUSG00000041623	D11Wsu47e
ENSMUSG00000015837	Sqstm1	ENSMUSG00000041629	Fam104a
ENSMUSG00000015880	Ncapg	ENSMUSG00000041638	Gcn1
ENSMUSG00000015882	Lcorl	ENSMUSG00000041642	Kif21b
ENSMUSG00000015937	Macroh2a1	ENSMUSG00000041645	Ddx24
ENSMUSG00000015942	Gtf2ird2	ENSMUSG00000041654	Slc39a11
ENSMUSG00000015961	Adss	ENSMUSG00000041673	Lrrc18
ENSMUSG00000015962	1700016C15Rik	ENSMUSG00000041685	Fcho2
ENSMUSG00000015971	Actr8	ENSMUSG00000041712	Ubr7
ENSMUSG00000015980	Lrrc27	ENSMUSG00000041716	Gm20604
ENSMUSG00000016018	Mtrex	ENSMUSG00000041720	Pi4ka
ENSMUSG00000016239	Lonrf3	ENSMUSG00000041733	Coq5
ENSMUSG00000016458	Wt1	ENSMUSG00000041740	Rnf10
ENSMUSG00000016487	Ppfibp1	ENSMUSG00000041757	Plekha6
ENSMUSG00000016526	Dyrk3	ENSMUSG00000041763	Tpp2
ENSMUSG00000016554	Eif3d	ENSMUSG00000041777	Cir1
ENSMUSG00000016619	Nup50	ENSMUSG00000041781	Cpsf2
ENSMUSG00000016626	Nlrp14	ENSMUSG00000041809	Efhc1
ENSMUSG00000016664	Pacsin2	ENSMUSG00000041815	Poldip3
ENSMUSG00000016921	Srsf6	ENSMUSG00000041837	Pdcd7
ENSMUSG00000016982	Pom121l2	ENSMUSG00000041841	Rpl37
ENSMUSG00000017049	Ccdc70	ENSMUSG00000041846	Ppp4r3a
ENSMUSG00000017119	Nbr1	ENSMUSG00000041852	Tcf20
ENSMUSG00000017132	Cyth1	ENSMUSG00000041859	Mcm3
ENSMUSG00000017146	Brca1	ENSMUSG00000041870	Ankrd13a
ENSMUSG00000017264	Exosc10	ENSMUSG00000041895	Wipi1
ENSMUSG00000017291	Taok1	ENSMUSG00000041912	Tdrkh
ENSMUSG00000017299	Dnttip1	ENSMUSG00000041923	Nol4
ENSMUSG00000017376	Nlk	ENSMUSG00000041935	Rimoc1
ENSMUSG00000017404	Rpl19	ENSMUSG00000041992	Rapgef5
ENSMUSG00000017466	Timp2	ENSMUSG00000042043	Tbca
ENSMUSG00000017478	Zc3h18	ENSMUSG00000042050	Dync2i1
ENSMUSG00000017485	Top2b	ENSMUSG00000042079	Hnrnpf
ENSMUSG00000017548	Suz12	ENSMUSG00000042096	Dao
ENSMUSG00000017639	Rab11fip4	ENSMUSG00000042133	Ppig
ENSMUSG00000017707	Serinc3	ENSMUSG00000042138	Msantd2
ENSMUSG00000017720	Trp53tg5	ENSMUSG00000042155	Klhl23
ENSMUSG00000017781	Pitpna	ENSMUSG00000042156	Dzip1
ENSMUSG00000017831	Rab5a	ENSMUSG00000042189	Tekt3
ENSMUSG00000017837	Nkiras2	ENSMUSG00000042197	Zfp451
ENSMUSG00000017843	Ppp2r5c	ENSMUSG00000042200	Cdrt4
ENSMUSG00000017861	Mybl2	ENSMUSG00000042207	Kdm5b
ENSMUSG00000017978	Cadps2	ENSMUSG00000042208	Sanbr
ENSMUSG00000017999	Ddx27	ENSMUSG00000042211	Fbxo38
ENSMUSG00000018001	Cyth3	ENSMUSG00000042213	Zfand4
ENSMUSG00000018040	Rrp7a	ENSMUSG00000042302	Ehbp1
ENSMUSG00000018171	Vmp1	ENSMUSG00000042305	Tmem183a
ENSMUSG00000018189	Uchl5	ENSMUSG00000042308	Setd1a
ENSMUSG00000018196	Glrx2	ENSMUSG00000042323	Pbrm1
ENSMUSG00000018209	Stk4	ENSMUSG00000042331	Specc1
ENSMUSG00000018287	Spag7	ENSMUSG00000042354	Gnl3
ENSMUSG00000018322	Tomm34	ENSMUSG00000042390	Gatad2b
ENSMUSG00000018326	Ywhab	ENSMUSG00000042423	Fbrs
ENSMUSG00000018372	Cep95	ENSMUSG00000042444	Mindy2
ENSMUSG00000018379	Srsf1	ENSMUSG00000042446	Zmym4
ENSMUSG00000018395	Kif3a	ENSMUSG00000042447	Mios
ENSMUSG00000018412	Kansl1	ENSMUSG00000042476	Abcb4
ENSMUSG00000018415	Gid4	ENSMUSG00000042487	Leo1
ENSMUSG00000018425	Dhx40	ENSMUSG00000042489	Clspn
ENSMUSG00000018428	Akap1	ENSMUSG00000042502	Cd2bp2
ENSMUSG00000018474	Chd3	ENSMUSG00000042508	Dmtf1
ENSMUSG00000018481	Appbp2	ENSMUSG00000042520	Ubap2l
ENSMUSG00000018501	Ncor1	ENSMUSG00000042525	4933428M09Rik
ENSMUSG00000018509	Cenpv	ENSMUSG00000042541	Sem1
ENSMUSG00000018541	Cwc25	ENSMUSG00000042548	Asxl1
ENSMUSG00000018548	Trim37	ENSMUSG00000042554	Zp3r
ENSMUSG00000018554	Ybx2	ENSMUSG00000042557	Sin3a
ENSMUSG00000018567	Gabarap	ENSMUSG00000042564	Fam227a
ENSMUSG00000018570	2810408A11Rik	ENSMUSG00000042599	Kdm7a
ENSMUSG00000018572	Phf23	ENSMUSG00000042606	Hirip3
ENSMUSG00000018593	Sparc	ENSMUSG00000042616	Oscp1
ENSMUSG00000018651	Tada2a	ENSMUSG00000042625	Safb2
ENSMUSG00000018666	Cbx1	ENSMUSG00000042644	Itpr3
ENSMUSG00000018669	Cdk5rap3	ENSMUSG00000042650	Alkbh5
ENSMUSG00000018677	Slc25a39	ENSMUSG00000042678	Myo15
ENSMUSG00000018697	Aatf	ENSMUSG00000042682	Selenok
ENSMUSG00000018707	Dync1h1	ENSMUSG00000042688	Mapk6
ENSMUSG00000018736	Ndel1	ENSMUSG00000042699	Dhx9
ENSMUSG00000018765	Fxr2	ENSMUSG00000042700	Sipa1l1
ENSMUSG00000018796	Acsl1	ENSMUSG00000042707	Dnali1
ENSMUSG00000018830	Myh11	ENSMUSG00000042708	Shcbp1l
ENSMUSG00000018844	Fndc8	ENSMUSG00000042726	Trafd1
ENSMUSG00000018846	Pank3	ENSMUSG00000042744	Hectd4
ENSMUSG00000018848	Rars	ENSMUSG00000042750	Bex2
ENSMUSG00000018921	Pelp1	ENSMUSG00000042772	Smg7
ENSMUSG00000018974	Sart3	ENSMUSG00000042790	Rnf214
ENSMUSG00000019027	Dnah1	ENSMUSG00000042851	Zc3h6
ENSMUSG00000019132	BC005537	ENSMUSG00000042961	Egflam
ENSMUSG00000019139	Isyna1	ENSMUSG00000043003	Rasef
ENSMUSG00000019254	Ppp1r12c	ENSMUSG00000043020	Dnai3
ENSMUSG00000019278	Dpep1	ENSMUSG00000043036	Ccdc63
ENSMUSG00000019303	Psmc3ip	ENSMUSG00000043050	Tnp2
ENSMUSG00000019370	Calm3	ENSMUSG00000043059	Zfp513
ENSMUSG00000019428	Fkbp8	ENSMUSG00000043067	Dpy19l1
ENSMUSG00000019432	Ddx39b	ENSMUSG00000043183	Simc1
ENSMUSG00000019467	Arhgef25	ENSMUSG00000043192	Gpi-ps
ENSMUSG00000019471	Cdc37	ENSMUSG00000043223	Gm4835
ENSMUSG00000019494	Cops6	ENSMUSG00000043241	Upf2
ENSMUSG00000019505	Ubb	ENSMUSG00000043319	Cox8c
ENSMUSG00000019564	Arid3a	ENSMUSG00000043323	Fbrsl1
ENSMUSG00000019578	Ubxn6	ENSMUSG00000043336	Filip1l
ENSMUSG00000019659	Ccdc12	ENSMUSG00000043384	Gprasp1
ENSMUSG00000019689	Fmc1	ENSMUSG00000043411	Usp48
ENSMUSG00000019699	Akt3	ENSMUSG00000043424	Eif3j2
ENSMUSG00000019710	Mrpl24	ENSMUSG00000043429	Ccdc185
ENSMUSG00000019715	Gle1	ENSMUSG00000043445	Pgp
ENSMUSG00000019732	Calr3	ENSMUSG00000043468	Adam30
ENSMUSG00000019738	Polr2i	ENSMUSG00000043483	Gm6863
ENSMUSG00000019777	Hdac2	ENSMUSG00000043535	Setx
ENSMUSG00000019782	Rwdd1	ENSMUSG00000043541	Casc1
ENSMUSG00000019795	Pcmt1	ENSMUSG00000043633	Fam221b
ENSMUSG00000019802	Sec63	ENSMUSG00000043635	Adamts3
ENSMUSG00000019813	Cep57l1	ENSMUSG00000043716	Rpl7
ENSMUSG00000019814	Ltv1	ENSMUSG00000043719	Col6a6
ENSMUSG00000019818	Cd164	ENSMUSG00000043733	Ptpn11
ENSMUSG00000019820	Utrn	ENSMUSG00000043873	Chil5
ENSMUSG00000019837	Gtf3c6	ENSMUSG00000043889	Gm8399
ENSMUSG00000019841	Rev3l	ENSMUSG00000043909	Trp53bp1
ENSMUSG00000019843	Fyn	ENSMUSG00000043913	Ccdc60
ENSMUSG00000019856	Fam184a	ENSMUSG00000043940	Wdfy3
ENSMUSG00000019861	Gopc	ENSMUSG00000043945	Adam6a
ENSMUSG00000019876	Pkib	ENSMUSG00000043962	Thrap3
ENSMUSG00000019892	Lrriq1	ENSMUSG00000043972	Opn5
ENSMUSG00000019906	Lin7a	ENSMUSG00000043987	Cep164
ENSMUSG00000019907	Ppp1r12a	ENSMUSG00000043998	Mgat2
ENSMUSG00000019917	Septin10	ENSMUSG00000044042	Fmn1
ENSMUSG00000019923	Zwint	ENSMUSG00000044068	Zrsr1
ENSMUSG00000019933	Mrln	ENSMUSG00000044072	Eml6
ENSMUSG00000019943	Atp2b1	ENSMUSG00000044083	Efcab8
ENSMUSG00000019945	Cabcoco1	ENSMUSG00000044084	Spem2
ENSMUSG00000019966	Kitl	ENSMUSG00000044098	Rsbn1
ENSMUSG00000019969	Psen1	ENSMUSG00000044117	Bmerb1
ENSMUSG00000019971	Cep290	ENSMUSG00000044122	Proca1
ENSMUSG00000019977	Hbs1l	ENSMUSG00000044141	E130201H02Rik
ENSMUSG00000019978	Epb41l2	ENSMUSG00000044206	Vsig4
ENSMUSG00000019986	Ahi1	ENSMUSG00000044211	Gm7887
ENSMUSG00000019996	Map7	ENSMUSG00000044224	Dnajc21
ENSMUSG00000020015	Cdk17	ENSMUSG00000044252	Osbpl1a
ENSMUSG00000020020	Usp44	ENSMUSG00000044268	Gm4895
ENSMUSG00000020022	Ndufa12	ENSMUSG00000044285	Ubb-ps
ENSMUSG00000020024	Cep83	ENSMUSG00000044308	Ubr3
ENSMUSG00000020029	Nudt4	ENSMUSG00000044340	Phlpp1
ENSMUSG00000020037	Rfx4	ENSMUSG00000044349	Snhg11
ENSMUSG00000020048	Hsp90b1	ENSMUSG00000044362	Ccdc89
ENSMUSG00000020059	Sycp3	ENSMUSG00000044468	Tent5c
ENSMUSG00000020064	Herc4	ENSMUSG00000044471	Lncpint
ENSMUSG00000020069	Hnrnph3	ENSMUSG00000044475	Ascc1
ENSMUSG00000020074	Ccar1	ENSMUSG00000044526	Znrf4
ENSMUSG00000020075	Ddx21	ENSMUSG00000044533	Rps2
ENSMUSG00000020076	Ddx50	ENSMUSG00000044566	Cage1
ENSMUSG00000020088	Sar1a	ENSMUSG00000044581	4932415D10Rik
ENSMUSG00000020102	Slc16a7	ENSMUSG00000044627	Swi5
ENSMUSG00000020114	Cand1	ENSMUSG00000044647	Csrnp3
ENSMUSG00000020115	Tbk1	ENSMUSG00000044701	Il27
ENSMUSG00000020116	Pno1	ENSMUSG00000044751	Atp5pb-ps
ENSMUSG00000020124	Usp15	ENSMUSG00000044757	Gm6430
ENSMUSG00000020130	Tbc1d15	ENSMUSG00000044783	Hjurp
ENSMUSG00000020131	Pcsk4	ENSMUSG00000044787	Spata32
ENSMUSG00000020156	Pwwp3a	ENSMUSG00000044791	Setd2
ENSMUSG00000020164	Kcnmb4os1	ENSMUSG00000044795	Cyb5d1
ENSMUSG00000020184	Mdm2	ENSMUSG00000044854	1700056E22Rik
ENSMUSG00000020189	Osbpl8	ENSMUSG00000044948	Cfap43
ENSMUSG00000020191	Spata48	ENSMUSG00000044949	Ubtd2
ENSMUSG00000020193	Zpbp	ENSMUSG00000045004	Spata21
ENSMUSG00000020196	Cabin1	ENSMUSG00000045031	Cetn4
ENSMUSG00000020198	Ap3d1	ENSMUSG00000045036	Tmem232
ENSMUSG00000020212	Mdm1	ENSMUSG00000045048	Gm9795
ENSMUSG00000020214	Glipr1l2	ENSMUSG00000045078	Rnf216
ENSMUSG00000020224	Llph	ENSMUSG00000045095	Magi1
ENSMUSG00000020248	Nfyb	ENSMUSG00000045103	Dmd
ENSMUSG00000020250	Txnrd1	ENSMUSG00000045104	Ldhb-ps
ENSMUSG00000020260	Pofut2	ENSMUSG00000045210	Vcpip1
ENSMUSG00000020263	Appl2	ENSMUSG00000045211	Nudt18
ENSMUSG00000020270	Smim23	ENSMUSG00000045252	Zfp574
ENSMUSG00000020272	Stk10	ENSMUSG00000045257	Morn2
ENSMUSG00000020283	Pex13	ENSMUSG00000045273	Cenph
ENSMUSG00000020286	1700093K21Rik	ENSMUSG00000045275	Lca5l
ENSMUSG00000020290	Xpo1	ENSMUSG00000045328	Cenpe
ENSMUSG00000020307	Cdc34	ENSMUSG00000045330	Magec2
ENSMUSG00000020311	Erlec1	ENSMUSG00000045350	Fam186a
ENSMUSG00000020315	Sptbn1	ENSMUSG00000045409	Trim39
ENSMUSG00000020317	Theg	ENSMUSG00000045411	2410002F23Rik
ENSMUSG00000020319	Wdpcp	ENSMUSG00000045427	Hnrnph2
ENSMUSG00000020321	Mdh1	ENSMUSG00000045466	Zfp956
ENSMUSG00000020328	Nudcd2	ENSMUSG00000045467	Ttll13
ENSMUSG00000020330	Hmmr	ENSMUSG00000045482	Trrap
ENSMUSG00000020332	Meikin	ENSMUSG00000045521	Tssk2
ENSMUSG00000020333	Acsl6	ENSMUSG00000045573	Penk
ENSMUSG00000020349	Ppp2ca	ENSMUSG00000045624	Esf1
ENSMUSG00000020358	Hnrnpab	ENSMUSG00000045672	Col27a1
ENSMUSG00000020361	Hspa4	ENSMUSG00000045690	Wdr89
ENSMUSG00000020368	Canx	ENSMUSG00000045709	Smkr-ps
ENSMUSG00000020380	Rad50	ENSMUSG00000045763	Basp1
ENSMUSG00000020385	Clk4	ENSMUSG00000045794	Lkaaear1
ENSMUSG00000020389	Cdkl3	ENSMUSG00000045795	Whamm
ENSMUSG00000020401	Garin3	ENSMUSG00000045799	Gm9800
ENSMUSG00000020409	Slu7	ENSMUSG00000045835	Hdgfl1
ENSMUSG00000020412	Ascc2	ENSMUSG00000045886	Pam16l
ENSMUSG00000020430	Pes1	ENSMUSG00000045896	Paip2b
ENSMUSG00000020434	4921536K21Rik	ENSMUSG00000045915	Ccdc42
ENSMUSG00000020435	Osbp2	ENSMUSG00000045928	4933440M02Rik
ENSMUSG00000020441	2310033P09Rik	ENSMUSG00000045942	BC049762
ENSMUSG00000020454	Eif4enif1	ENSMUSG00000045962	Wnk1
ENSMUSG00000020456	Ogdh	ENSMUSG00000045969	Ing1
ENSMUSG00000020462	Cfap36	ENSMUSG00000045983	Eif4g1
ENSMUSG00000020463	Ppp4r3b	ENSMUSG00000046010	Zfp830
ENSMUSG00000020472	Zkscan17	ENSMUSG00000046056	Sbsn
ENSMUSG00000020475	Pgam2	ENSMUSG00000046062	Ppp1r15b
ENSMUSG00000020476	Dbnl	ENSMUSG00000046085	4931422A03Rik
ENSMUSG00000020481	Ankrd36	ENSMUSG00000046111	Cep295
ENSMUSG00000020483	Dynll2	ENSMUSG00000046138	9930021J03Rik
ENSMUSG00000020486	Septin4	ENSMUSG00000046173	Pabpc6
ENSMUSG00000020491	2810021J22Rik	ENSMUSG00000046192	Iqub
ENSMUSG00000020496	Rnf187	ENSMUSG00000046196	Ttc39d
ENSMUSG00000020515	Cnot8	ENSMUSG00000046229	Scand1
ENSMUSG00000020516	Rps6kb1	ENSMUSG00000046230	Vps13a
ENSMUSG00000020520	Galnt10	ENSMUSG00000046337	Fam178b
ENSMUSG00000020525	Ppm1d	ENSMUSG00000046338	Gpat2
ENSMUSG00000020530	Ggnbp2	ENSMUSG00000046341	Gm11223
ENSMUSG00000020532	Acaca	ENSMUSG00000046351	Zfp322a
ENSMUSG00000020562	Efcab10	ENSMUSG00000046372	Gm5590
ENSMUSG00000020571	Pdia6	ENSMUSG00000046434	Hnrnpa1
ENSMUSG00000020580	Rock2	ENSMUSG00000046440	Gm5564
ENSMUSG00000020593	Lpin1	ENSMUSG00000046447	Camk2n1
ENSMUSG00000020594	Pum2	ENSMUSG00000046516	Cox17
ENSMUSG00000020608	Smc6	ENSMUSG00000046573	Lyrm4
ENSMUSG00000020610	Amz2	ENSMUSG00000046585	Cfap58
ENSMUSG00000020612	Prkar1a	ENSMUSG00000046717	Igbp1b
ENSMUSG00000020617	1700012B07Rik	ENSMUSG00000046722	Cdc42se1
ENSMUSG00000020622	Nt5c1b	ENSMUSG00000046723	Adam24
ENSMUSG00000020636	Allc	ENSMUSG00000046727	Cystm1
ENSMUSG00000020639	Pfn4	ENSMUSG00000046750	Selenov
ENSMUSG00000020640	Itsn2	ENSMUSG00000046753	Ccdc66
ENSMUSG00000020652	Cenpo	ENSMUSG00000046755	Kif2b
ENSMUSG00000020654	Adcy3	ENSMUSG00000046782	Ttc6
ENSMUSG00000020657	Dnajc27	ENSMUSG00000046841	Ckap4
ENSMUSG00000020671	Rab10	ENSMUSG00000046846	Spesp1
ENSMUSG00000020677	Ddx52	ENSMUSG00000046865	Fbl
ENSMUSG00000020680	Taf15	ENSMUSG00000046934	Csl
ENSMUSG00000020681	Ace	ENSMUSG00000046942	Mageb16
ENSMUSG00000020687	Cdc27	ENSMUSG00000046957	Spz1
ENSMUSG00000020690	Efcab3	ENSMUSG00000046958	4930432E11Rik
ENSMUSG00000020694	Tlk2	ENSMUSG00000047021	Cfap65
ENSMUSG00000020697	Lig3	ENSMUSG00000047022	Mipol1
ENSMUSG00000020705	Ddx42	ENSMUSG00000047025	Ccer1
ENSMUSG00000020706	Ftsj3	ENSMUSG00000047036	Zfp445
ENSMUSG00000020708	Psmc5	ENSMUSG00000047104	Pbp2
ENSMUSG00000020719	Ddx5	ENSMUSG00000047108	Dnajb7
ENSMUSG00000020720	Psmd12	ENSMUSG00000047126	Cltc
ENSMUSG00000020721	Helz	ENSMUSG00000047129	1700113H08Rik
ENSMUSG00000020728	Cep112	ENSMUSG00000047141	Zfp654
ENSMUSG00000020737	Jpt1	ENSMUSG00000047193	Dync2h1
ENSMUSG00000020743	Mif4gd	ENSMUSG00000047248	C2cd3
ENSMUSG00000020745	Pafah1b1	ENSMUSG00000047361	Gm973
ENSMUSG00000020755	Sap30bp	ENSMUSG00000047369	Dnah14
ENSMUSG00000020775	Mrpl38	ENSMUSG00000047417	Rexo1
ENSMUSG00000020776	Fbf1	ENSMUSG00000047446	Arl4a
ENSMUSG00000020783	Ncbp3	ENSMUSG00000047454	Gphn
ENSMUSG00000020792	Exoc7	ENSMUSG00000047466	8030462N17Rik
ENSMUSG00000020799	Tekt1	ENSMUSG00000047502	Mroh7
ENSMUSG00000020802	Ube2o	ENSMUSG00000047509	Gm6776
ENSMUSG00000020807	4933427D14Rik	ENSMUSG00000047514	Tspyl1
ENSMUSG00000020814	Mxra7	ENSMUSG00000047518	Slfnl1
ENSMUSG00000020817	Rabep1	ENSMUSG00000047528	Flacc1
ENSMUSG00000020823	Sec14l1	ENSMUSG00000047547	Cltb
ENSMUSG00000020827	Mink1	ENSMUSG00000047619	Ddi1
ENSMUSG00000020844	Nxn	ENSMUSG00000047648	Fbxo30
ENSMUSG00000020849	Ywhae	ENSMUSG00000047649	Cd3eap
ENSMUSG00000020850	Prpf8	ENSMUSG00000047674	Pdha2
ENSMUSG00000020859	Spag9	ENSMUSG00000047675	Rps8
ENSMUSG00000020863	Luc7l3	ENSMUSG00000047694	Yipf6
ENSMUSG00000020867	Spata20	ENSMUSG00000047696	Ccdc144b
ENSMUSG00000020869	Lrrc59	ENSMUSG00000047720	Clec2m
ENSMUSG00000020870	Cdc34b	ENSMUSG00000047777	Phf13
ENSMUSG00000020878	Lrrc46	ENSMUSG00000047810	Ccdc88b
ENSMUSG00000020882	Cacnb1	ENSMUSG00000047821	Trim16
ENSMUSG00000020893	Per1	ENSMUSG00000047841	Fndc11
ENSMUSG00000020900	Myh10	ENSMUSG00000047866	Lonp2
ENSMUSG00000020903	Stx8	ENSMUSG00000047878	A4galt
ENSMUSG00000020904	Cfap52	ENSMUSG00000047888	Tnrc6b
ENSMUSG00000020914	Top2a	ENSMUSG00000047905	Gm8566
ENSMUSG00000020923	Ubtf	ENSMUSG00000047907	Tshz2
ENSMUSG00000020925	Ccdc43	ENSMUSG00000047940	Stpg2
ENSMUSG00000020929	Eftud2	ENSMUSG00000047945	Marcksl1
ENSMUSG00000020936	Nmt1	ENSMUSG00000047995	Cypt4
ENSMUSG00000020945	Lyzl6	ENSMUSG00000048000	Gigyf2
ENSMUSG00000020954	Strn3	ENSMUSG00000048003	Catsper4
ENSMUSG00000020962	Gtf2a1	ENSMUSG00000048077	H1f7
ENSMUSG00000020964	Sel1l	ENSMUSG00000048096	Lmod1
ENSMUSG00000020978	Klhdc2	ENSMUSG00000048100	Taf13
ENSMUSG00000020982	Nemf	ENSMUSG00000048118	Arid4a
ENSMUSG00000020986	Sec23a	ENSMUSG00000048154	Kmt2d
ENSMUSG00000020993	Trappc6b	ENSMUSG00000048222	Mfap1b
ENSMUSG00000020994	Pnn	ENSMUSG00000048230	Fbxo43
ENSMUSG00000021003	Galc	ENSMUSG00000048249	Crebrf
ENSMUSG00000021007	Spata7	ENSMUSG00000048271	Rbm33
ENSMUSG00000021012	Zc3h14	ENSMUSG00000048385	Scrt1
ENSMUSG00000021022	Ppp2r3c	ENSMUSG00000048410	Zfp407
ENSMUSG00000021027	Ralgapa1	ENSMUSG00000048411	Gm597
ENSMUSG00000021036	Sptlc2	ENSMUSG00000048416	Mlf1
ENSMUSG00000021037	Ahsa1	ENSMUSG00000048445	Ccdc57
ENSMUSG00000021039	Snw1	ENSMUSG00000048478	Spata33
ENSMUSG00000021051	Ppp2r5e	ENSMUSG00000048520	Fbxl13
ENSMUSG00000021056	Tex21	ENSMUSG00000048578	Mlec
ENSMUSG00000021061	Sptb	ENSMUSG00000048592	Gm5946
ENSMUSG00000021065	Fut8	ENSMUSG00000048602	Morc2b
ENSMUSG00000021066	Atl1	ENSMUSG00000048647	Exd1
ENSMUSG00000021067	Sav1	ENSMUSG00000048652	Samd13
ENSMUSG00000021078	Tomm20l	ENSMUSG00000048655	Ccdc169
ENSMUSG00000021086	Ccdc175	ENSMUSG00000048661	Lemd3
ENSMUSG00000021090	Lrrc9	ENSMUSG00000048686	Hmgb4
ENSMUSG00000021096	Ppm1a	ENSMUSG00000048696	Mex3d
ENSMUSG00000021097	Clmn	ENSMUSG00000048701	Ccdc6
ENSMUSG00000021109	Hif1a	ENSMUSG00000048707	Tprn
ENSMUSG00000021111	Papola	ENSMUSG00000048731	Ggnbp1
ENSMUSG00000021112	Pals1	ENSMUSG00000048732	Klhl11
ENSMUSG00000021113	Snapc1	ENSMUSG00000048787	Dcun1d3
ENSMUSG00000021114	Atp6v1d	ENSMUSG00000048794	Cfap100
ENSMUSG00000021115	Vrk1	ENSMUSG00000048799	Cep120
ENSMUSG00000021116	Eif2s1	ENSMUSG00000048865	Arhgap30
ENSMUSG00000021124	Vti1b	ENSMUSG00000048874	Phf3
ENSMUSG00000021134	Srsf5	ENSMUSG00000048878	Hexim1
ENSMUSG00000021139	Gm20498	ENSMUSG00000048911	Rnf24
ENSMUSG00000021140	Pcnx	ENSMUSG00000048922	Cdca2
ENSMUSG00000021143	Pacs2	ENSMUSG00000048930	Tada3
ENSMUSG00000021149	Gtpbp4	ENSMUSG00000048967	Yjefn3
ENSMUSG00000021156	Zmynd11	ENSMUSG00000049091	Sephs2
ENSMUSG00000021178	Psmc1	ENSMUSG00000049106	Dcaf5
ENSMUSG00000021179	Nrde2	ENSMUSG00000049123	Catsperg2
ENSMUSG00000021182	Ccdc88c	ENSMUSG00000049160	Tex50
ENSMUSG00000021188	Trip11	ENSMUSG00000049230	Myef2l
ENSMUSG00000021189	Atxn3	ENSMUSG00000049295	Zfp219
ENSMUSG00000021192	Golga5	ENSMUSG00000049327	Kmt5a
ENSMUSG00000021194	Chga	ENSMUSG00000049401	Ogfr
ENSMUSG00000021196	Pfkp	ENSMUSG00000049470	Aff4
ENSMUSG00000021203	Otub2	ENSMUSG00000049550	Clip1
ENSMUSG00000021218	Gdi2	ENSMUSG00000049553	Polr1a
ENSMUSG00000021221	Dpf3	ENSMUSG00000049571	Cfap46
ENSMUSG00000021234	Fam161b	ENSMUSG00000049658	Bdp1
ENSMUSG00000021244	Ylpm1	ENSMUSG00000049659	Aftph
ENSMUSG00000021248	Tmed10	ENSMUSG00000049676	Catsperg1
ENSMUSG00000021258	Ccnk	ENSMUSG00000049739	Zfp646
ENSMUSG00000021262	Evl	ENSMUSG00000049760	Micos13
ENSMUSG00000021264	Yy1	ENSMUSG00000049792	Bag5
ENSMUSG00000021268	Meg3	ENSMUSG00000049800	Sertad2
ENSMUSG00000021270	Hsp90aa1	ENSMUSG00000049807	Arhgap23
ENSMUSG00000021273	Fdft1	ENSMUSG00000049811	Fam161a
ENSMUSG00000021279	Cdc42bpb	ENSMUSG00000049916	2610318N02Rik
ENSMUSG00000021281	Tnfaip2	ENSMUSG00000049940	Pgrmc2
ENSMUSG00000021282	Eif5	ENSMUSG00000049957	Ccdc137
ENSMUSG00000021288	Klc1	ENSMUSG00000049971	Glt1d1
ENSMUSG00000021301	Hecw1	ENSMUSG00000050017	Pitpnb
ENSMUSG00000021311	Mtr	ENSMUSG00000050035	Fhl4
ENSMUSG00000021338	Carmil1	ENSMUSG00000050050	Ccdc158
ENSMUSG00000021339	Mrs2	ENSMUSG00000050089	Akap4
ENSMUSG00000021363	Mak	ENSMUSG00000050107	Haspin
ENSMUSG00000021366	Hivep1	ENSMUSG00000050114	Prdx6b
ENSMUSG00000021374	Nup153	ENSMUSG00000050122	Vwa3b
ENSMUSG00000021377	Dek	ENSMUSG00000050141	Fam205c
ENSMUSG00000021379	Id4	ENSMUSG00000050150	Slc9b1
ENSMUSG00000021384	Susd3	ENSMUSG00000050213	Snip1
ENSMUSG00000021392	Nol8	ENSMUSG00000050243	Gm5446
ENSMUSG00000021413	Prpf4b	ENSMUSG00000050299	Gm9843
ENSMUSG00000021414	Fam217a	ENSMUSG00000050379	Septin6
ENSMUSG00000021415	4933417A18Rik	ENSMUSG00000050530	Fam171a1
ENSMUSG00000021420	Fars2	ENSMUSG00000050553	Gk2
ENSMUSG00000021427	Ssr1	ENSMUSG00000050555	Hyls1
ENSMUSG00000021428	Riok1	ENSMUSG00000050565	Tor1aip2
ENSMUSG00000021431	Snrnp48	ENSMUSG00000050592	Fam78a
ENSMUSG00000021476	Habp4	ENSMUSG00000050612	Txndc2
ENSMUSG00000021477	Ctsl	ENSMUSG00000050623	Catsperz
ENSMUSG00000021488	Nsd1	ENSMUSG00000050668	Gpatch11
ENSMUSG00000021494	Ddx41	ENSMUSG00000050677	Ccdc96
ENSMUSG00000021499	Catsper3	ENSMUSG00000050685	Ccdc54
ENSMUSG00000021500	Ddx46	ENSMUSG00000050702	4930563M21Rik
ENSMUSG00000021501	Caml	ENSMUSG00000050860	Phospho1
ENSMUSG00000021534	1700001L19Rik	ENSMUSG00000050900	Gm7327
ENSMUSG00000021537	Cetn3	ENSMUSG00000050944	Efcab5
ENSMUSG00000021546	Hnrnpk	ENSMUSG00000050957	Insl6
ENSMUSG00000021549	Rasa1	ENSMUSG00000050994	Adgb
ENSMUSG00000021552	Gkap1	ENSMUSG00000050996	Cetn1
ENSMUSG00000021557	Agtpbp1	ENSMUSG00000051036	Ttc24
ENSMUSG00000021577	Sdha	ENSMUSG00000051111	Sv2c
ENSMUSG00000021585	Cast	ENSMUSG00000051149	Adnp
ENSMUSG00000021595	Nsun2	ENSMUSG00000051166	Eml5
ENSMUSG00000021596	Mctp1	ENSMUSG00000051185	Fam174a
ENSMUSG00000021598	Med10	ENSMUSG00000051223	Bzw1
ENSMUSG00000021615	Xrcc4	ENSMUSG00000051255	Gm6563
ENSMUSG00000021619	Atg10	ENSMUSG00000051257	Trap1a
ENSMUSG00000021635	Rad17	ENSMUSG00000051276	Actrt2
ENSMUSG00000021639	Gtf2h2	ENSMUSG00000051285	Pcmtd1
ENSMUSG00000021643	Serf1	ENSMUSG00000051306	Usp42
ENSMUSG00000021668	Polk	ENSMUSG00000051316	Taf7
ENSMUSG00000021669	Cert1	ENSMUSG00000051343	Rab11fip5
ENSMUSG00000021670	Hmgcr	ENSMUSG00000051403	Ppp1r37
ENSMUSG00000021671	Poc5	ENSMUSG00000051427	Ccdc157
ENSMUSG00000021676	Iqgap2	ENSMUSG00000051435	Fhad1
ENSMUSG00000021681	Aggf1	ENSMUSG00000051451	Crebzf
ENSMUSG00000021686	Ap3b1	ENSMUSG00000051586	Mical3
ENSMUSG00000021690	Jmy	ENSMUSG00000051618	Ubqln3
ENSMUSG00000021693	Kif2a	ENSMUSG00000051648	Kctd19
ENSMUSG00000021699	Pde4d	ENSMUSG00000051674	Dcun1d4
ENSMUSG00000021709	Erbin	ENSMUSG00000051695	Pcbp1
ENSMUSG00000021712	Trim23	ENSMUSG00000051728	Fam243
ENSMUSG00000021713	Ppwd1	ENSMUSG00000051732	Pabpc2
ENSMUSG00000021715	Cwc27	ENSMUSG00000051736	Fam229b
ENSMUSG00000021716	Srek1ip1	ENSMUSG00000051768	Xrcc1
ENSMUSG00000021733	Slc4a7	ENSMUSG00000051811	Cox6b2
ENSMUSG00000021737	Psmd6	ENSMUSG00000051900	Abca16
ENSMUSG00000021741	Gm5457	ENSMUSG00000051910	Sox6
ENSMUSG00000021748	Pdhb	ENSMUSG00000051934	Spats2
ENSMUSG00000021754	Map3k1	ENSMUSG00000051956	Rnf133
ENSMUSG00000021758	Ddx4	ENSMUSG00000051989	Smim11
ENSMUSG00000021767	Kat6b	ENSMUSG00000052056	Zfp217
ENSMUSG00000021771	Vdac2	ENSMUSG00000052062	Pard3b
ENSMUSG00000021775	Nr1d2	ENSMUSG00000052075	1700029F12Rik
ENSMUSG00000021790	Dydc1	ENSMUSG00000052105	Mtcl1
ENSMUSG00000021791	Dydc2	ENSMUSG00000052137	Rbm12b2
ENSMUSG00000021807	Rtraf	ENSMUSG00000052144	Ppp4r2
ENSMUSG00000021811	Dnajc9	ENSMUSG00000052221	Ppp1r36
ENSMUSG00000021819	Zswim8	ENSMUSG00000052253	Zfp622
ENSMUSG00000021823	Vcl	ENSMUSG00000052273	Dnah3
ENSMUSG00000021832	Psmc6	ENSMUSG00000052276	Ostn
ENSMUSG00000021838	Samd4	ENSMUSG00000052293	Taf9
ENSMUSG00000021843	Ktn1	ENSMUSG00000052296	Ppp6r1
ENSMUSG00000021846	Peli2	ENSMUSG00000052337	Immt
ENSMUSG00000021850	ccdc198	ENSMUSG00000052372	Il1rapl1
ENSMUSG00000021870	Slmap	ENSMUSG00000052387	Trpm3
ENSMUSG00000021879	Dnah12	ENSMUSG00000052397	Ezr
ENSMUSG00000021891	Mettl6	ENSMUSG00000052407	Ccdc171
ENSMUSG00000021892	Sh3bp5	ENSMUSG00000052428	Tmco1
ENSMUSG00000021901	Bap1	ENSMUSG00000052469	Tcp10c
ENSMUSG00000021902	Phf7	ENSMUSG00000052488	Cherp
ENSMUSG00000021911	Parg	ENSMUSG00000052525	Spdya
ENSMUSG00000021916	Glt8d1	ENSMUSG00000052539	Magi3
ENSMUSG00000021918	Nek4	ENSMUSG00000052566	Hook2
ENSMUSG00000021936	Mapk8	ENSMUSG00000052613	Pcdh15
ENSMUSG00000021938	Pspc1	ENSMUSG00000052642	Lypd9
ENSMUSG00000021940	Ptpn20	ENSMUSG00000052676	Zmat1
ENSMUSG00000021945	Zmym2	ENSMUSG00000052698	Tln2
ENSMUSG00000021948	Prkcd	ENSMUSG00000052713	Zfp608
ENSMUSG00000021958	Pinx1	ENSMUSG00000052727	Map1b
ENSMUSG00000021959	Lats2	ENSMUSG00000052783	Grk4
ENSMUSG00000021963	Sap18	ENSMUSG00000052794	1700030K09Rik
ENSMUSG00000021966	Prss52	ENSMUSG00000052812	Atad2b
ENSMUSG00000021972	Hmbox1	ENSMUSG00000052825	Gm9892
ENSMUSG00000021977	1700129C05Rik	ENSMUSG00000052833	Sae1
ENSMUSG00000021983	Atp8a2	ENSMUSG00000052861	Dnah6
ENSMUSG00000021986	Amer2	ENSMUSG00000052906	Ubxn8
ENSMUSG00000021987	Mtmr6	ENSMUSG00000052915	Msl1
ENSMUSG00000021997	Lrrc63	ENSMUSG00000052926	Rnaseh2a
ENSMUSG00000022000	Zc3h13	ENSMUSG00000053012	Krcc1
ENSMUSG00000022010	Tsc22d1	ENSMUSG00000053030	Spink2
ENSMUSG00000022013	Dnajc15	ENSMUSG00000053038	Gm6180
ENSMUSG00000022014	Epsti1	ENSMUSG00000053110	Yap1
ENSMUSG00000022016	Akap11	ENSMUSG00000053111	Fank1
ENSMUSG00000022019	Tdrd3	ENSMUSG00000053119	Chmp3
ENSMUSG00000022023	Wbp4	ENSMUSG00000053153	Spag16
ENSMUSG00000022024	Sugt1	ENSMUSG00000053184	Spaca3
ENSMUSG00000022032	Scara5	ENSMUSG00000053199	Arhgap20
ENSMUSG00000022035	Ccdc25	ENSMUSG00000053205	Styx
ENSMUSG00000022037	Clu	ENSMUSG00000053286	Trmt1l
ENSMUSG00000022039	Adam2	ENSMUSG00000053289	Ddx10
ENSMUSG00000022064	Pibf1	ENSMUSG00000053293	Pom121
ENSMUSG00000022085	Pebp4	ENSMUSG00000053332	Gas5
ENSMUSG00000022089	Bin3	ENSMUSG00000053375	Atp6v1e2
ENSMUSG00000022091	Sorbs3	ENSMUSG00000053453	Thoc7
ENSMUSG00000022092	Ppp3cc	ENSMUSG00000053470	Kdm3a
ENSMUSG00000022105	Rb1	ENSMUSG00000053477	Tcf4
ENSMUSG00000022108	Itm2b	ENSMUSG00000053508	Gtsf2
ENSMUSG00000022110	Sucla2	ENSMUSG00000053510	Nrd1
ENSMUSG00000022111	Uchl3	ENSMUSG00000053536	Cstf2t
ENSMUSG00000022119	Rbm26	ENSMUSG00000053553	3110082I17Rik
ENSMUSG00000022136	Dnajc3	ENSMUSG00000053624	Gykl1
ENSMUSG00000022141	Nipbl	ENSMUSG00000053754	Chd8
ENSMUSG00000022148	Fyb	ENSMUSG00000053768	Chchd3
ENSMUSG00000022151	Ttc33	ENSMUSG00000053769	Lysmd1
ENSMUSG00000022155	Mroh2b	ENSMUSG00000053783	1700016K19Rik
ENSMUSG00000022177	Haus4	ENSMUSG00000053838	Nudcd3
ENSMUSG00000022185	Acin1	ENSMUSG00000053841	Txlna
ENSMUSG00000022191	Drosha	ENSMUSG00000053877	Srcap
ENSMUSG00000022194	Pabpn1	ENSMUSG00000053896	4933409G03Rik
ENSMUSG00000022197	Pdzd2	ENSMUSG00000053898	Ech1
ENSMUSG00000022200	Golph3	ENSMUSG00000054003	Tdrd9
ENSMUSG00000022201	Zfr	ENSMUSG00000054051	Ercc6
ENSMUSG00000022205	Sub1	ENSMUSG00000054079	Utp18
ENSMUSG00000022214	Dcaf11	ENSMUSG00000054150	Syne3
ENSMUSG00000022216	Psme1	ENSMUSG00000054199	Gon4l
ENSMUSG00000022234	Cct5	ENSMUSG00000054237	Fra10ac1
ENSMUSG00000022236	Ropn1l	ENSMUSG00000054277	Arfgap3
ENSMUSG00000022246	Rai14	ENSMUSG00000054302	Eapp
ENSMUSG00000022247	Brix1	ENSMUSG00000054320	Lrrc36
ENSMUSG00000022249	Ttc23l	ENSMUSG00000054405	Dnajc8
ENSMUSG00000022255	Mtdh	ENSMUSG00000054428	Atpif1
ENSMUSG00000022263	Trio	ENSMUSG00000054452	Tle5
ENSMUSG00000022269	Marchf11	ENSMUSG00000054455	Vapb
ENSMUSG00000022272	Myo10	ENSMUSG00000054611	Kdm2a
ENSMUSG00000022280	Rnf19a	ENSMUSG00000054717	Hmgb2
ENSMUSG00000022283	Pabpc1	ENSMUSG00000054727	1700013H16Rik
ENSMUSG00000022285	Ywhaz	ENSMUSG00000054728	Phactr1
ENSMUSG00000022306	Zfpm2	ENSMUSG00000054752	Fsd1l
ENSMUSG00000022307	Oxr1	ENSMUSG00000054766	Set
ENSMUSG00000022312	Eif3h	ENSMUSG00000054863	Tafa5
ENSMUSG00000022314	Rad21	ENSMUSG00000054885	4930578G10Rik
ENSMUSG00000022329	Stk3	ENSMUSG00000054901	Arhgef33
ENSMUSG00000022332	Khdrbs3	ENSMUSG00000054909	Wbscr25
ENSMUSG00000022339	Ebag9	ENSMUSG00000055024	Ep300
ENSMUSG00000022360	Atad2	ENSMUSG00000055065	Ddx17
ENSMUSG00000022364	Tbc1d31	ENSMUSG00000055078	Gabra5
ENSMUSG00000022375	Lrrc6	ENSMUSG00000055148	Klf2
ENSMUSG00000022377	Asap1	ENSMUSG00000055204	Ankrd17
ENSMUSG00000022387	Brd1	ENSMUSG00000055214	Pld5
ENSMUSG00000022388	Ttll8	ENSMUSG00000055296	Tmem245
ENSMUSG00000022389	Tef	ENSMUSG00000055319	Sec23ip
ENSMUSG00000022390	Zc3h7b	ENSMUSG00000055322	Tns1
ENSMUSG00000022391	Rangap1	ENSMUSG00000055334	Snupn
ENSMUSG00000022394	L3mbtl2	ENSMUSG00000055421	Pcdh9
ENSMUSG00000022403	St13	ENSMUSG00000055436	Srsf11
ENSMUSG00000022419	Deptor	ENSMUSG00000055531	Cpsf6
ENSMUSG00000022420	Dnal4	ENSMUSG00000055602	Tcp10b
ENSMUSG00000022427	Tomm22	ENSMUSG00000055629	B4galnt4
ENSMUSG00000022428	Cby1	ENSMUSG00000055660	Mettl4
ENSMUSG00000022429	Dmc1	ENSMUSG00000055692	Tmem191c
ENSMUSG00000022431	Ribc2	ENSMUSG00000055760	Gemin6
ENSMUSG00000022432	Smc1b	ENSMUSG00000055762	Eef1d
ENSMUSG00000022439	Parvg	ENSMUSG00000055817	Mta3
ENSMUSG00000022441	Efcab6	ENSMUSG00000055826	Tescl
ENSMUSG00000022443	Myh9	ENSMUSG00000055850	Rnf181
ENSMUSG00000022450	Ndufa6	ENSMUSG00000055862	Izumo4
ENSMUSG00000022452	Smdt1	ENSMUSG00000055891	Ubl4b
ENSMUSG00000022455	Wbp2nl	ENSMUSG00000055897	Ppp4r1l-ps
ENSMUSG00000022466	Rpap3	ENSMUSG00000056018	Ccdc7b
ENSMUSG00000022471	Xrcc6	ENSMUSG00000056050	Mia3
ENSMUSG00000022472	Desi1	ENSMUSG00000056076	Eif3b
ENSMUSG00000022501	Prm1	ENSMUSG00000056131	Pgm3
ENSMUSG00000022507	1810013L24Rik	ENSMUSG00000056158	Car10
ENSMUSG00000022518	4930562C15Rik	ENSMUSG00000056185	Snx32
ENSMUSG00000022521	Crebbp	ENSMUSG00000056201	Cfl1
ENSMUSG00000022529	Zfp263	ENSMUSG00000056211	R3hdm1
ENSMUSG00000022536	Glyr1	ENSMUSG00000056216	Cebpg
ENSMUSG00000022538	Lsg1	ENSMUSG00000056260	Lrif1
ENSMUSG00000022542	Septin12	ENSMUSG00000056267	Cep70
ENSMUSG00000022557	Bop1	ENSMUSG00000056342	Usp34
ENSMUSG00000022558	Mroh1	ENSMUSG00000056394	Lig1
ENSMUSG00000022564	Grina	ENSMUSG00000056429	Tgoln1
ENSMUSG00000022565	Plec	ENSMUSG00000056436	Cyct
ENSMUSG00000022568	Scrib	ENSMUSG00000056476	Med12l
ENSMUSG00000022579	Gpihbp1	ENSMUSG00000056494	Cngb3
ENSMUSG00000022601	Zbtb11	ENSMUSG00000056508	1700001K19Rik
ENSMUSG00000022602	Arc	ENSMUSG00000056509	Gm9999
ENSMUSG00000022603	Mroh4	ENSMUSG00000056515	Rab31
ENSMUSG00000022607	Ptk2	ENSMUSG00000056531	Ccdc18
ENSMUSG00000022619	Mapk8ip2	ENSMUSG00000056536	Pign
ENSMUSG00000022621	Rabl2	ENSMUSG00000056553	Ptprn2
ENSMUSG00000022622	Acr	ENSMUSG00000056598	Drc3
ENSMUSG00000022629	Kif21a	ENSMUSG00000056608	Chd9
ENSMUSG00000022635	Zcrb1	ENSMUSG00000056612	Ppp1r14b
ENSMUSG00000022641	Bbx	ENSMUSG00000056617	4931429L15Rik
ENSMUSG00000022656	Nectin3	ENSMUSG00000056692	Ilrun
ENSMUSG00000022663	Atg3	ENSMUSG00000056735	A930024E05Rik
ENSMUSG00000022678	Nde1	ENSMUSG00000056763	Cspp1
ENSMUSG00000022680	Pdxdc1	ENSMUSG00000056770	Setd3
ENSMUSG00000022685	Parn	ENSMUSG00000056771	Gm10010
ENSMUSG00000022701	Ccdc191	ENSMUSG00000056772	Rps6-ps2
ENSMUSG00000022710	Usp7	ENSMUSG00000056815	Gm6812
ENSMUSG00000022715	Tmem114	ENSMUSG00000056832	Ttc26
ENSMUSG00000022718	Dgcr8	ENSMUSG00000056851	Pcbp2
ENSMUSG00000022723	Crybg3	ENSMUSG00000056877	Rps15a-ps1
ENSMUSG00000022765	Snap29	ENSMUSG00000056899	Immp2l
ENSMUSG00000022768	Ccdc116	ENSMUSG00000056912	1700017N19Rik
ENSMUSG00000022770	Dlg1	ENSMUSG00000056919	Cep162
ENSMUSG00000022771	Ppil2	ENSMUSG00000056952	Tatdn2
ENSMUSG00000022774	Ncbp2	ENSMUSG00000056962	Jmjd6
ENSMUSG00000022787	Wdr53	ENSMUSG00000056987	Garin2
ENSMUSG00000022789	Dnm1l	ENSMUSG00000056999	Ide
ENSMUSG00000022790	Igsf11	ENSMUSG00000057000	Nxf3
ENSMUSG00000022791	Tnk2	ENSMUSG00000057047	1700010B08Rik
ENSMUSG00000022800	Fyttd1	ENSMUSG00000057072	Spata45
ENSMUSG00000022805	Cfap91	ENSMUSG00000057110	Cntrl
ENSMUSG00000022808	Snx4	ENSMUSG00000057113	Npm1
ENSMUSG00000022811	Zfp148	ENSMUSG00000057116	Semp2l2a
ENSMUSG00000022832	Ropn1	ENSMUSG00000057132	Rpgrip1
ENSMUSG00000022837	Iqcb1	ENSMUSG00000057133	Chd6
ENSMUSG00000022855	Senp2	ENSMUSG00000057147	Dph6
ENSMUSG00000022858	Tra2b	ENSMUSG00000057156	Homez
ENSMUSG00000022867	Usp25	ENSMUSG00000057176	Ccdc189
ENSMUSG00000022883	Robo1	ENSMUSG00000057236	Rbbp4
ENSMUSG00000022884	Eif4a2	ENSMUSG00000057246	BC051142
ENSMUSG00000022889	Mrpl39	ENSMUSG00000057265	Bbof1
ENSMUSG00000022892	App	ENSMUSG00000057286	St6galnac2
ENSMUSG00000022897	Dyrk1a	ENSMUSG00000057322	Rpl38
ENSMUSG00000022911	Arl13b	ENSMUSG00000057335	Cep170
ENSMUSG00000022914	Brwd1	ENSMUSG00000057363	Uxs1
ENSMUSG00000022957	Itsn1	ENSMUSG00000057367	Birc2
ENSMUSG00000022961	Son	ENSMUSG00000057388	Mrpl18
ENSMUSG00000022972	Cfap298	ENSMUSG00000057406	Nsd2
ENSMUSG00000022974	Paxbp1	ENSMUSG00000057411	Antkmt
ENSMUSG00000022982	Sod1	ENSMUSG00000057421	Las1l
ENSMUSG00000022995	Enah	ENSMUSG00000057572	Zbtb8os
ENSMUSG00000023007	Prpf40b	ENSMUSG00000057596	Trim30d
ENSMUSG00000023010	Tmbim6	ENSMUSG00000057637	Prdm2
ENSMUSG00000023027	Atf1	ENSMUSG00000057649	Brd9
ENSMUSG00000023032	Slc4a8	ENSMUSG00000057738	Sptan1
ENSMUSG00000023055	Calcoco1	ENSMUSG00000057805	1700084M14Rik
ENSMUSG00000023072	Cep89	ENSMUSG00000057816	Cfap299
ENSMUSG00000023084	Lrrc71	ENSMUSG00000057858	Fam204a
ENSMUSG00000023088	Abcc1	ENSMUSG00000058006	Mdn1
ENSMUSG00000023104	Rfc2	ENSMUSG00000058046	4933430I17Rik
ENSMUSG00000023106	Denr	ENSMUSG00000058064	Gm10036
ENSMUSG00000023118	Sympk	ENSMUSG00000058126	Tpm3-rs7
ENSMUSG00000023150	Ivns1abp	ENSMUSG00000058135	Gstm1
ENSMUSG00000023170	Gps2	ENSMUSG00000058145	Adamts17
ENSMUSG00000023175	Bsg	ENSMUSG00000058153	Sez6l
ENSMUSG00000023257	Cypt1	ENSMUSG00000058183	Mmel1
ENSMUSG00000023272	Creld2	ENSMUSG00000058230	Arhgap35
ENSMUSG00000023350	Phf8-ps	ENSMUSG00000058297	Spock2
ENSMUSG00000023456	Tpi1	ENSMUSG00000058301	Upf1
ENSMUSG00000023467	Tulp2	ENSMUSG00000058318	Phf21a
ENSMUSG00000023505	Cdca3	ENSMUSG00000058325	Dock1
ENSMUSG00000023805	Synj2	ENSMUSG00000058388	Phtf1
ENSMUSG00000023806	Rsph3b	ENSMUSG00000058398	Prss43
ENSMUSG00000023830	Igf2r	ENSMUSG00000058546	Rpl23a
ENSMUSG00000023852	Chd1	ENSMUSG00000058558	Rpl5
ENSMUSG00000023868	Pde10a	ENSMUSG00000058567	Gm2531
ENSMUSG00000023873	1700010I14Rik	ENSMUSG00000058626	Capn11
ENSMUSG00000023883	Phf10	ENSMUSG00000058638	Zfp110
ENSMUSG00000023919	Cenpq	ENSMUSG00000058643	Speer4f1
ENSMUSG00000023923	Tbc1d5	ENSMUSG00000058655	Eif4b
ENSMUSG00000023930	Crisp2	ENSMUSG00000058670	Dmtf1l
ENSMUSG00000023931	Efhb	ENSMUSG00000058690	Ccser2
ENSMUSG00000023932	Cdc5l	ENSMUSG00000058709	Egln2
ENSMUSG00000023938	Aars2	ENSMUSG00000058761	Rnf169
ENSMUSG00000023944	Hsp90ab1	ENSMUSG00000058799	Nap1l1
ENSMUSG00000023952	Gtpbp2	ENSMUSG00000058816	Ppp1r2-ps3
ENSMUSG00000023977	Ubr2	ENSMUSG00000058835	Abi1
ENSMUSG00000023984	Gm20517	ENSMUSG00000058881	Zfp516
ENSMUSG00000024002	Brd4	ENSMUSG00000058925	Ccdc192
ENSMUSG00000024006	Stk38	ENSMUSG00000059005	Hnrnpa3
ENSMUSG00000024033	Rsph1	ENSMUSG00000059040	Eno1b
ENSMUSG00000024044	Epb41l3	ENSMUSG00000059089	Fcgr4
ENSMUSG00000024045	Akap8	ENSMUSG00000059114	Lrrc74a
ENSMUSG00000024049	Myom1	ENSMUSG00000059119	Nap1l4
ENSMUSG00000024056	Ndc80	ENSMUSG00000059150	Rpl26-ps4
ENSMUSG00000024059	Clip4	ENSMUSG00000059182	Skap2
ENSMUSG00000024067	Dpy30	ENSMUSG00000059195	Gm12715
ENSMUSG00000024068	Spast	ENSMUSG00000059208	Hnrnpm
ENSMUSG00000024073	Birc6	ENSMUSG00000059248	Septin9
ENSMUSG00000024077	Strn	ENSMUSG00000059263	Usp47
ENSMUSG00000024079	Eif2ak2	ENSMUSG00000059273	Zc3h4
ENSMUSG00000024081	Cebpz	ENSMUSG00000059278	Naa38
ENSMUSG00000024083	Pja2	ENSMUSG00000059288	Cdyl
ENSMUSG00000024085	Man2a1	ENSMUSG00000059323	Tonsl
ENSMUSG00000024091	Vapa	ENSMUSG00000059395	Nkapl
ENSMUSG00000024095	Hnrnpll	ENSMUSG00000059474	Mbtd1
ENSMUSG00000024096	Ralbp1	ENSMUSG00000059482	Cfap418
ENSMUSG00000024097	Srsf7	ENSMUSG00000059498	Fcgr3
ENSMUSG00000024099	Ndufv2	ENSMUSG00000059518	Znhit1
ENSMUSG00000024104	Washc2	ENSMUSG00000059540	Tcea2
ENSMUSG00000024109	Nrxn1	ENSMUSG00000059554	Ccdc28a
ENSMUSG00000024154	Gtf2a1l	ENSMUSG00000059645	Gm7361
ENSMUSG00000024158	Hagh	ENSMUSG00000059659	Gm10069
ENSMUSG00000024163	Mapk8ip3	ENSMUSG00000059690	1700020N15Rik
ENSMUSG00000024169	Ift140	ENSMUSG00000059708	Akap17b
ENSMUSG00000024175	Tekt4	ENSMUSG00000059751	Rps3a3
ENSMUSG00000024182	Axin1	ENSMUSG00000059810	Rgs3
ENSMUSG00000024187	Fam234a	ENSMUSG00000059834	Sclt1
ENSMUSG00000024188	Luc7l	ENSMUSG00000059854	Hydin
ENSMUSG00000024193	Phf1	ENSMUSG00000059891	Tsks
ENSMUSG00000024209	Acsbg3	ENSMUSG00000059920	4930453N24Rik
ENSMUSG00000024213	Nudt3	ENSMUSG00000059921	Unc5c
ENSMUSG00000024218	Taf11	ENSMUSG00000059939	9430015G10Rik
ENSMUSG00000024222	Fkbp5	ENSMUSG00000059970	Hspa2
ENSMUSG00000024236	Svil	ENSMUSG00000059974	Ntm
ENSMUSG00000024238	Zeb1	ENSMUSG00000059981	Taok2
ENSMUSG00000024242	Map4k3	ENSMUSG00000060036	Rpl3
ENSMUSG00000024253	Dync2li1	ENSMUSG00000060126	Tpt1
ENSMUSG00000024259	Slc25a46	ENSMUSG00000060128	Gm2710
ENSMUSG00000024260	Sap130	ENSMUSG00000060143	Gm10076
ENSMUSG00000024270	Slc39a6	ENSMUSG00000060147	Serpinb6a
ENSMUSG00000024277	Mapre2	ENSMUSG00000060176	Kif27
ENSMUSG00000024286	Ccny	ENSMUSG00000060206	Zfp462
ENSMUSG00000024287	Thoc1	ENSMUSG00000060227	Golm2
ENSMUSG00000024290	Rock1	ENSMUSG00000060260	Pwwp2b
ENSMUSG00000024294	Mib1	ENSMUSG00000060261	Gtf2i
ENSMUSG00000024306	Ccdc178	ENSMUSG00000060268	Armh1
ENSMUSG00000024309	Pfdn6	ENSMUSG00000060279	Ap2a1
ENSMUSG00000024312	Wdr46	ENSMUSG00000060373	Hnrnpc
ENSMUSG00000024317	Rnf138	ENSMUSG00000060407	Cyp2a12
ENSMUSG00000024335	Brd2	ENSMUSG00000060445	Sycp2
ENSMUSG00000024346	Pfdn1	ENSMUSG00000060450	Rnf14
ENSMUSG00000024350	Dnajc18	ENSMUSG00000060467	Gm10080
ENSMUSG00000024352	Spata24	ENSMUSG00000060475	Wtap
ENSMUSG00000024357	Sil1	ENSMUSG00000060538	Tmem219
ENSMUSG00000024359	Hspa9	ENSMUSG00000060579	Fhit
ENSMUSG00000024360	Etf1	ENSMUSG00000060600	Eno3
ENSMUSG00000024369	Nelfe	ENSMUSG00000060679	Mrps9
ENSMUSG00000024382	Ercc3	ENSMUSG00000060708	Bloc1s4
ENSMUSG00000024384	Iws1	ENSMUSG00000060715	1700019A02Rik
ENSMUSG00000024387	Csnk2b	ENSMUSG00000060726	Tmsb15a
ENSMUSG00000024392	Bag6	ENSMUSG00000060739	Nsa2
ENSMUSG00000024393	Prrc2a	ENSMUSG00000060771	Tsga10
ENSMUSG00000024397	Aif1	ENSMUSG00000060811	Gm10088
ENSMUSG00000024400	Wdr33	ENSMUSG00000060843	Ctnna3
ENSMUSG00000024404	Riok3	ENSMUSG00000060923	Acyp2
ENSMUSG00000024422	Dhx16	ENSMUSG00000060938	Rpl26
ENSMUSG00000024425	Ndfip1	ENSMUSG00000060985	Tdrd5
ENSMUSG00000024429	Gnl1	ENSMUSG00000060989	Gm11847
ENSMUSG00000024430	Cabyr	ENSMUSG00000061024	Rrs1
ENSMUSG00000024456	Diaph1	ENSMUSG00000061028	Clasrp
ENSMUSG00000024457	Trim26	ENSMUSG00000061032	Rrp1
ENSMUSG00000024474	Ik	ENSMUSG00000061046	Haghl
ENSMUSG00000024483	Ankhd1	ENSMUSG00000061062	Hdac1-ps
ENSMUSG00000024487	Yipf5	ENSMUSG00000061099	Gapdhs
ENSMUSG00000024491	Rbm27	ENSMUSG00000061104	Sap18b
ENSMUSG00000024498	Tcerg1	ENSMUSG00000061130	Ppm1b
ENSMUSG00000024501	Dpysl3	ENSMUSG00000061136	Prpf40a
ENSMUSG00000024507	Hsd17b4	ENSMUSG00000061186	Sfmbt2
ENSMUSG00000024513	Mbd2	ENSMUSG00000061244	Exoc5
ENSMUSG00000024527	Afg3l2	ENSMUSG00000061288	Taok3
ENSMUSG00000024532	1700034E13Rik	ENSMUSG00000061298	Agbl4
ENSMUSG00000024539	Ptpn2	ENSMUSG00000061306	Slc38a10
ENSMUSG00000024542	Cep192	ENSMUSG00000061322	Dnai1
ENSMUSG00000024560	Cxxc1	ENSMUSG00000061411	Nol4l
ENSMUSG00000024566	Atp9b	ENSMUSG00000061458	Nol10
ENSMUSG00000024576	Csnk1a1	ENSMUSG00000061518	Cox5b
ENSMUSG00000024583	Txnl1	ENSMUSG00000061525	4921509C19Rik
ENSMUSG00000024587	Nars	ENSMUSG00000061533	Cep128
ENSMUSG00000024590	Lmnb1	ENSMUSG00000061589	Dot1l
ENSMUSG00000024608	Rps14	ENSMUSG00000061607	Mdc1
ENSMUSG00000024614	Tmx3	ENSMUSG00000061633	Ndufb11b
ENSMUSG00000024654	Asrgl1	ENSMUSG00000061650	Med9
ENSMUSG00000024658	Gm9750	ENSMUSG00000061665	Cd2ap
ENSMUSG00000024660	Incenp	ENSMUSG00000061666	Gdpd1
ENSMUSG00000024661	Fth1	ENSMUSG00000061684	Rpl21-ps8
ENSMUSG00000024663	Rab3il1	ENSMUSG00000061689	Dlgap4
ENSMUSG00000024687	Osbp	ENSMUSG00000061751	Kalrn
ENSMUSG00000024695	Zfp91	ENSMUSG00000061755	Bod1l
ENSMUSG00000024740	Ddb1	ENSMUSG00000061759	Armt1
ENSMUSG00000024749	Tmc1	ENSMUSG00000061787	Rps17
ENSMUSG00000024759	Atl3	ENSMUSG00000061802	Odad2
ENSMUSG00000024772	Ehd1	ENSMUSG00000061848	Gm5805
ENSMUSG00000024773	Atg2a	ENSMUSG00000061859	Patj
ENSMUSG00000024780	Cdc37l1	ENSMUSG00000061882	Ccdc62
ENSMUSG00000024786	Majin	ENSMUSG00000061923	Odf1
ENSMUSG00000024795	Kif20b	ENSMUSG00000061928	Dsg1b
ENSMUSG00000024805	Pcgf5	ENSMUSG00000061950	Ppp4r1
ENSMUSG00000024812	Tjp2	ENSMUSG00000061983	Rps12
ENSMUSG00000024841	Eif1ad	ENSMUSG00000062014	Gmfb
ENSMUSG00000024843	Chka	ENSMUSG00000062028	Irgc1
ENSMUSG00000024853	Sf3b2	ENSMUSG00000062075	Lmnb2
ENSMUSG00000024862	Klc2	ENSMUSG00000062078	Qki
ENSMUSG00000024878	Cbwd1	ENSMUSG00000062083	Rpl13a-ps1
ENSMUSG00000024885	Aldh3b1	ENSMUSG00000062154	Tex33
ENSMUSG00000024897	Apba1	ENSMUSG00000062190	Lancl2
ENSMUSG00000024900	Cpt1a	ENSMUSG00000062202	Btbd9
ENSMUSG00000024908	Ppp6r3	ENSMUSG00000062203	Gspt1
ENSMUSG00000024913	Lrp5	ENSMUSG00000062209	Erbb4
ENSMUSG00000024914	Drap1	ENSMUSG00000062224	4933411G06Rik
ENSMUSG00000024921	Smarca2	ENSMUSG00000062234	Gak
ENSMUSG00000024927	Rela	ENSMUSG00000062270	Morf4l1
ENSMUSG00000024937	Ehbp1l1	ENSMUSG00000062296	Trank1
ENSMUSG00000024943	Smc5	ENSMUSG00000062328	Rpl17
ENSMUSG00000024947	Men1	ENSMUSG00000062353	Gm15772
ENSMUSG00000024949	Sf1	ENSMUSG00000062438	Adam1b
ENSMUSG00000024957	Kcnk4	ENSMUSG00000062554	Gm12751
ENSMUSG00000024958	Gpr137	ENSMUSG00000062588	Gm6104
ENSMUSG00000024959	Bad	ENSMUSG00000062604	Srpk2
ENSMUSG00000024960	Plcb3	ENSMUSG00000062611	Rps3a2
ENSMUSG00000024963	Dnajc4	ENSMUSG00000062627	Mysm1
ENSMUSG00000024966	Stip1	ENSMUSG00000062732	Lypd4
ENSMUSG00000024969	Mark2	ENSMUSG00000062761	Zfp512
ENSMUSG00000024973	Plaat5	ENSMUSG00000062846	Gm14176
ENSMUSG00000024974	Smc3	ENSMUSG00000062859	Tcp11
ENSMUSG00000024975	Pdcd4	ENSMUSG00000062866	Phactr2
ENSMUSG00000024983	Vti1a	ENSMUSG00000062939	Stat4
ENSMUSG00000024989	Cep55	ENSMUSG00000062949	Atp11c
ENSMUSG00000024991	Eif3a	ENSMUSG00000062980	Cped1
ENSMUSG00000024999	Noc3l	ENSMUSG00000062995	Ica1
ENSMUSG00000025001	Hells	ENSMUSG00000063063	Ctnna2
ENSMUSG00000025016	Tm9sf3	ENSMUSG00000063077	Kif1b
ENSMUSG00000025019	Lcor	ENSMUSG00000063129	Aldoart2
ENSMUSG00000025025	Mxi1	ENSMUSG00000063163	Speer2
ENSMUSG00000025027	Xpnpep1	ENSMUSG00000063200	Nol7
ENSMUSG00000025035	Arl3	ENSMUSG00000063229	Ldha
ENSMUSG00000025041	Nt5c2	ENSMUSG00000063273	Naa15
ENSMUSG00000025044	Msr1	ENSMUSG00000063281	Zfp35
ENSMUSG00000025047	Pdcd11	ENSMUSG00000063328	Gm9396
ENSMUSG00000025049	Taf5	ENSMUSG00000063334	Krr1
ENSMUSG00000025050	Pcgf6	ENSMUSG00000063358	Mapk1
ENSMUSG00000025060	Slk	ENSMUSG00000063409	Lrrc43
ENSMUSG00000025066	Sfr1	ENSMUSG00000063410	Stk24
ENSMUSG00000025081	Tdrd1	ENSMUSG00000063450	Syne2
ENSMUSG00000025103	Btbd1	ENSMUSG00000063511	Snrnp70
ENSMUSG00000025104	Hdgfl3	ENSMUSG00000063524	Eno1
ENSMUSG00000025130	P4hb	ENSMUSG00000063550	Nup98
ENSMUSG00000025132	Arhgdia	ENSMUSG00000063568	Jazf1
ENSMUSG00000025137	Pcyt2	ENSMUSG00000063646	Jakmip1
ENSMUSG00000025151	Maged1	ENSMUSG00000063652	Slc22a21
ENSMUSG00000025155	Dus1l	ENSMUSG00000063663	Brwd3
ENSMUSG00000025156	Gps1	ENSMUSG00000063754	Gm10136
ENSMUSG00000025171	Ubtd1	ENSMUSG00000063800	Prpf38a
ENSMUSG00000025176	Hoga1	ENSMUSG00000063804	Lin28b
ENSMUSG00000025203	Scd2	ENSMUSG00000063810	Alms1
ENSMUSG00000025204	Ndufb8	ENSMUSG00000063820	Arl9
ENSMUSG00000025220	Oga	ENSMUSG00000063870	Chd4
ENSMUSG00000025228	Actr1a	ENSMUSG00000063873	Slc24a3
ENSMUSG00000025231	Sufu	ENSMUSG00000063882	Uqcrh
ENSMUSG00000025234	Arih1	ENSMUSG00000063889	Crem
ENSMUSG00000025241	Fyco1	ENSMUSG00000063902	Gm7964
ENSMUSG00000025261	Huwe1	ENSMUSG00000063932	Poteg
ENSMUSG00000025288	4933436I01Rik	ENSMUSG00000063952	Brpf3
ENSMUSG00000025289	Prdx4	ENSMUSG00000063972	Nr6a1
ENSMUSG00000025290	Rps24	ENSMUSG00000064061	Dzip3
ENSMUSG00000025326	Ube3a	ENSMUSG00000064063	BC048507
ENSMUSG00000025337	Sbds	ENSMUSG00000064068	Mtx1
ENSMUSG00000025357	Dgka	ENSMUSG00000064128	Cenpj
ENSMUSG00000025358	Cdk2	ENSMUSG00000064137	Rhox8
ENSMUSG00000025362	Rps26	ENSMUSG00000064138	Fam172a
ENSMUSG00000025364	Pa2g4	ENSMUSG00000064145	Arih2
ENSMUSG00000025369	Smarcc2	ENSMUSG00000064181	Rab3ip
ENSMUSG00000025371	Chmp6	ENSMUSG00000064193	Gm4735
ENSMUSG00000025372	Baiap2	ENSMUSG00000064202	Spata6l
ENSMUSG00000025393	Atp5b	ENSMUSG00000064280	Ccdc146
ENSMUSG00000025404	R3hdm2	ENSMUSG00000064281	Rpl19-ps1
ENSMUSG00000025408	Ddit3	ENSMUSG00000064294	Aox3
ENSMUSG00000025410	Dctn2	ENSMUSG00000064299	4921528I07Rik
ENSMUSG00000025413	Ttc4	ENSMUSG00000064302	Clasp1
ENSMUSG00000025420	Katnal2	ENSMUSG00000064307	Lrrc51
ENSMUSG00000025428	Atp5a1	ENSMUSG00000064339	mt-Rnr2
ENSMUSG00000025437	Usp33	ENSMUSG00000064341	mt-Nd1
ENSMUSG00000025439	Clns1a	ENSMUSG00000064344	mt-Tm
ENSMUSG00000025451	Paip1	ENSMUSG00000064345	mt-Nd2
ENSMUSG00000025453	Nnt	ENSMUSG00000064346	mt-Tw
ENSMUSG00000025474	Tubgcp2	ENSMUSG00000064351	mt-Co1
ENSMUSG00000025477	Inpp5a	ENSMUSG00000064354	mt-Co2
ENSMUSG00000025480	Syce1	ENSMUSG00000064367	mt-Nd5
ENSMUSG00000025487	Psmd13	ENSMUSG00000064368	mt-Nd6
ENSMUSG00000025508	Rplp2	ENSMUSG00000064370	mt-Cytb
ENSMUSG00000025532	Crcp	ENSMUSG00000064372	mt-Tp
ENSMUSG00000025571	Tnrc6c	ENSMUSG00000064682	Gm25813
ENSMUSG00000025584	Pde8a	ENSMUSG00000064694	Gm24146
ENSMUSG00000025592	Dach2	ENSMUSG00000064696	None
ENSMUSG00000025607	Copg2	ENSMUSG00000064702	Gm24950
ENSMUSG00000025613	Cct8	ENSMUSG00000064772	Gm25202
ENSMUSG00000025616	Usp16	ENSMUSG00000064844	Gm26202
ENSMUSG00000025626	Phf6	ENSMUSG00000064856	None
ENSMUSG00000025651	Uqcrc1	ENSMUSG00000064871	Snord58b
ENSMUSG00000025745	Hadha	ENSMUSG00000064923	Gm22042
ENSMUSG00000025757	Hspa4l	ENSMUSG00000064945	Rny3
ENSMUSG00000025762	Larp1b	ENSMUSG00000064968	Snord47
ENSMUSG00000025782	Taf3	ENSMUSG00000064984	Snord73a
ENSMUSG00000025783	4930412O13Rik	ENSMUSG00000064999	None
ENSMUSG00000025808	Ccdc7a	ENSMUSG00000065037	Rn7sk
ENSMUSG00000025823	Pdia4	ENSMUSG00000065041	Gm24044
ENSMUSG00000025862	Stag2	ENSMUSG00000065087	Snord22
ENSMUSG00000025873	Faf2	ENSMUSG00000065176	Rnu12
ENSMUSG00000025878	Uimc1	ENSMUSG00000065232	Gm22973
ENSMUSG00000025885	Myo5b	ENSMUSG00000065273	Gm25128
ENSMUSG00000025894	Aasdhppt	ENSMUSG00000065289	Gm23650
ENSMUSG00000025898	Cwf19l2	ENSMUSG00000065327	Gm22058
ENSMUSG00000025907	Rb1cc1	ENSMUSG00000065622	Gm24763
ENSMUSG00000025912	Mybl1	ENSMUSG00000065645	None
ENSMUSG00000025916	Ppp1r42	ENSMUSG00000065752	Gm23344
ENSMUSG00000025925	Terf1	ENSMUSG00000065767	Gm23849
ENSMUSG00000025950	Idh1	ENSMUSG00000065773	None
ENSMUSG00000025955	Akr1cl	ENSMUSG00000065808	Gm23037
ENSMUSG00000025968	Ndufs1	ENSMUSG00000065820	Gm26316
ENSMUSG00000025977	Boll	ENSMUSG00000065824	None
ENSMUSG00000025982	Sf3b1	ENSMUSG00000065853	Gm22354
ENSMUSG00000025983	Ccdc150	ENSMUSG00000065870	None
ENSMUSG00000025986	Slc39a10	ENSMUSG00000065878	Snord34
ENSMUSG00000026018	Ica1l	ENSMUSG00000065904	Gm26109
ENSMUSG00000026020	Nop58	ENSMUSG00000065905	Gm26110
ENSMUSG00000026021	Sumo1	ENSMUSG00000065911	Gm24447
ENSMUSG00000026034	Clk1	ENSMUSG00000065944	Rnu2-10
ENSMUSG00000026049	Tex30	ENSMUSG00000065954	Tacc1
ENSMUSG00000026062	Slc9a2	ENSMUSG00000066036	Ubr4
ENSMUSG00000026074	Map4k4	ENSMUSG00000066037	Hnrnpr
ENSMUSG00000026078	Pdcl3	ENSMUSG00000066043	Phactr4
ENSMUSG00000026082	Rev1	ENSMUSG00000066107	Gm12666
ENSMUSG00000026083	Eif5b	ENSMUSG00000066232	Ipo7
ENSMUSG00000026107	Nabp1	ENSMUSG00000066306	Numa1
ENSMUSG00000026110	Mgat4a	ENSMUSG00000066315	Gm12918
ENSMUSG00000026113	Inpp4a	ENSMUSG00000066406	Akap13
ENSMUSG00000026131	Dst	ENSMUSG00000066500	Izumo2
ENSMUSG00000026134	Prim2	ENSMUSG00000066551	Hmgb1
ENSMUSG00000026142	Rhbdd1	ENSMUSG00000066554	Gm10167
ENSMUSG00000026153	Fam135a	ENSMUSG00000066592	Gm7589
ENSMUSG00000026155	Smap1	ENSMUSG00000066643	Wdr35
ENSMUSG00000026171	Rnf25	ENSMUSG00000066687	Plzf
ENSMUSG00000026173	Plcd4	ENSMUSG00000066894	Vsig10
ENSMUSG00000026179	Pnkd	ENSMUSG00000066900	Suds3
ENSMUSG00000026182	Tnp1	ENSMUSG00000067017	Capza1-ps1
ENSMUSG00000026202	Tuba4a	ENSMUSG00000067158	Col4a4
ENSMUSG00000026203	Dnajb2	ENSMUSG00000067274	Rplp0
ENSMUSG00000026213	Stk11ip	ENSMUSG00000067338	Tuba3b
ENSMUSG00000026219	Trip12	ENSMUSG00000067367	Lyar
ENSMUSG00000026226	Spata3	ENSMUSG00000067438	Hmx1
ENSMUSG00000026229	Psmd1	ENSMUSG00000067608	Pcna-ps2
ENSMUSG00000026234	Ncl	ENSMUSG00000067629	Syngap1
ENSMUSG00000026238	Ptma	ENSMUSG00000067702	Tuba3a
ENSMUSG00000026254	Eif4e2	ENSMUSG00000067773	Defb41
ENSMUSG00000026255	Efhd1	ENSMUSG00000067795	4930444P10Rik
ENSMUSG00000026274	Pask	ENSMUSG00000067818	Myl9
ENSMUSG00000026275	Ppp1r7	ENSMUSG00000067848	4933402N22Rik
ENSMUSG00000026277	Stk25	ENSMUSG00000067869	Tcea1-ps1
ENSMUSG00000026289	Atg16l1	ENSMUSG00000067873	Htatsf1
ENSMUSG00000026301	Iqca	ENSMUSG00000067878	Map7d3
ENSMUSG00000026319	Relch	ENSMUSG00000067942	Zfp160
ENSMUSG00000026331	Slco6c1	ENSMUSG00000067995	Gtf2f2
ENSMUSG00000026335	Pam	ENSMUSG00000068036	Afdn
ENSMUSG00000026336	Slco6d1	ENSMUSG00000068039	Tcp1
ENSMUSG00000026339	Ccdc93	ENSMUSG00000068040	Tm9sf4
ENSMUSG00000026341	Actr3	ENSMUSG00000068062	Gm14164
ENSMUSG00000026353	Ubxn4	ENSMUSG00000068115	Ninl
ENSMUSG00000026356	Dars	ENSMUSG00000068165	Gm10233
ENSMUSG00000026361	Cdc73	ENSMUSG00000068167	Csnka2ip
ENSMUSG00000026385	Dbi	ENSMUSG00000068184	Ndufaf2
ENSMUSG00000026401	Cd55b	ENSMUSG00000068200	Gm5931
ENSMUSG00000026409	Pfkfb2	ENSMUSG00000068205	Macrod2
ENSMUSG00000026414	Tnnt2	ENSMUSG00000068290	Ddrgk1
ENSMUSG00000026425	Srgap2	ENSMUSG00000068328	Aup1
ENSMUSG00000026429	Ube2t	ENSMUSG00000068391	Chrac1
ENSMUSG00000026434	Nucks1	ENSMUSG00000068394	Cep152
ENSMUSG00000026463	Atp2b4	ENSMUSG00000068479	Mfap1a
ENSMUSG00000026466	Tor1aip1	ENSMUSG00000068522	Aard
ENSMUSG00000026469	Xpr1	ENSMUSG00000068747	Sort1
ENSMUSG00000026470	Stx6	ENSMUSG00000068794	Col28a1
ENSMUSG00000026482	Rgl1	ENSMUSG00000068823	Csde1
ENSMUSG00000026484	Rnf2	ENSMUSG00000068860	Gm128
ENSMUSG00000026491	Ahctf1	ENSMUSG00000068876	Cgn
ENSMUSG00000026495	Efcab2	ENSMUSG00000068882	Ssb
ENSMUSG00000026496	Parp1	ENSMUSG00000068917	Clk2
ENSMUSG00000026499	Acbd3	ENSMUSG00000068922	Msto1
ENSMUSG00000026504	Sdccag8	ENSMUSG00000069011	Gm10254
ENSMUSG00000026523	Wdr64	ENSMUSG00000069014	Gm5641
ENSMUSG00000026532	Spta1	ENSMUSG00000069045	Ddx3y
ENSMUSG00000026546	Cfap45	ENSMUSG00000069089	Cdk7
ENSMUSG00000026553	Copa	ENSMUSG00000069114	Zbtb10
ENSMUSG00000026554	Dcaf8	ENSMUSG00000069125	Rps24-ps2
ENSMUSG00000026567	Adcy10	ENSMUSG00000069135	Cep43
ENSMUSG00000026571	Dcaf6	ENSMUSG00000069306	H4c17
ENSMUSG00000026572	Tbx19	ENSMUSG00000069324	Gm5096
ENSMUSG00000026576	Atp1b1	ENSMUSG00000069355	Gm5152
ENSMUSG00000026577	Blzf1	ENSMUSG00000069441	Dsg1a
ENSMUSG00000026578	Ccdc181	ENSMUSG00000069565	Dazap1
ENSMUSG00000026585	Kifap3	ENSMUSG00000069601	Ank3
ENSMUSG00000026592	Tex35	ENSMUSG00000069622	Gm10273
ENSMUSG00000026601	Axdnd1	ENSMUSG00000069631	Strada
ENSMUSG00000026605	Cenpf	ENSMUSG00000069720	4930572O03Rik
ENSMUSG00000026615	Eprs	ENSMUSG00000069733	Ube2u
ENSMUSG00000026622	Nek2	ENSMUSG00000069805	Fbp1
ENSMUSG00000026623	Lpgat1	ENSMUSG00000069833	Ahnak
ENSMUSG00000026626	Ppp2r5a	ENSMUSG00000069844	Sco1
ENSMUSG00000026643	Nmt2	ENSMUSG00000069855	Slc47a2
ENSMUSG00000026650	Meig1	ENSMUSG00000069925	4932416K20Rik
ENSMUSG00000026655	Fam107b	ENSMUSG00000069971	4933402J07Rik
ENSMUSG00000026672	Optn	ENSMUSG00000070002	Ell
ENSMUSG00000026679	Enkur	ENSMUSG00000070271	Gm13268
ENSMUSG00000026683	Nuf2	ENSMUSG00000070280	Slc22a14
ENSMUSG00000026696	Vamp4	ENSMUSG00000070283	Ndufaf3
ENSMUSG00000026712	Mrc1	ENSMUSG00000070315	4930581F22Rik
ENSMUSG00000026721	Rabgap1l	ENSMUSG00000070319	Eif3g
ENSMUSG00000026728	Vim	ENSMUSG00000070327	Rnf213
ENSMUSG00000026734	4921504E06Rik	ENSMUSG00000070331	Qrich2
ENSMUSG00000026739	Bmi1	ENSMUSG00000070332	Trim80
ENSMUSG00000026740	Dnajc1	ENSMUSG00000070343	Gm10288
ENSMUSG00000026743	Mllt10	ENSMUSG00000070388	Fbxo39
ENSMUSG00000026754	Golga1	ENSMUSG00000070425	Xntrpc
ENSMUSG00000026755	Arpc5l	ENSMUSG00000070471	Erich6
ENSMUSG00000026761	Orc4	ENSMUSG00000070544	Top1
ENSMUSG00000026764	Kif5c	ENSMUSG00000070565	Rasal2
ENSMUSG00000026774	Potegl	ENSMUSG00000070568	Slc6a21
ENSMUSG00000026775	Yme1l1	ENSMUSG00000070639	Lrrc8b
ENSMUSG00000026781	Acbd5	ENSMUSG00000070697	Utp3
ENSMUSG00000026782	Abi2	ENSMUSG00000070708	Gtsf1l
ENSMUSG00000026790	Odf2	ENSMUSG00000070729	Gm12966
ENSMUSG00000026803	Ttf1	ENSMUSG00000070732	Rbm44
ENSMUSG00000026807	Ak8	ENSMUSG00000070738	Dgkd
ENSMUSG00000026812	Tsc1	ENSMUSG00000070802	Pnma8b
ENSMUSG00000026817	Ak1	ENSMUSG00000070806	Zmynd12
ENSMUSG00000026819	Slc25a25	ENSMUSG00000070883	Ccdc173
ENSMUSG00000026821	Ralgds	ENSMUSG00000070933	Speer4d
ENSMUSG00000026822	Lcn2	ENSMUSG00000070980	Actl7b
ENSMUSG00000026827	Gpd2	ENSMUSG00000071015	Gm136
ENSMUSG00000026837	Col5a1	ENSMUSG00000071054	Safb
ENSMUSG00000026851	BC005624	ENSMUSG00000071072	Ptges3
ENSMUSG00000026853	Crat	ENSMUSG00000071103	1700029J07Rik
ENSMUSG00000026864	Hspa5	ENSMUSG00000071104	Ccdc110
ENSMUSG00000026867	Gapvd1	ENSMUSG00000071138	Tex24
ENSMUSG00000026872	Zeb2	ENSMUSG00000071176	Arhgef10
ENSMUSG00000026883	Dab2ip	ENSMUSG00000071226	Cecr2
ENSMUSG00000026894	Morn5	ENSMUSG00000071252	2210408I21Rik
ENSMUSG00000026914	Psmd14	ENSMUSG00000071322	Tcp10a
ENSMUSG00000026915	Strbp	ENSMUSG00000071359	Tbpl1
ENSMUSG00000026918	Brd3	ENSMUSG00000071454	Dtnb
ENSMUSG00000026926	Pmpca	ENSMUSG00000071533	Pcnp
ENSMUSG00000026927	Entr1	ENSMUSG00000071550	Cfap44
ENSMUSG00000026931	1700019N19Rik	ENSMUSG00000071636	Rimbp3
ENSMUSG00000026933	Camsap1	ENSMUSG00000071644	Eef1g
ENSMUSG00000026940	Ccdc183	ENSMUSG00000071645	Tut1
ENSMUSG00000026969	Fam166a	ENSMUSG00000071650	Ganab
ENSMUSG00000026970	Rbms1	ENSMUSG00000071653	1810009A15Rik
ENSMUSG00000026987	Baz2b	ENSMUSG00000071655	Ubxn1
ENSMUSG00000026994	Galnt3	ENSMUSG00000071659	Hnrnpul2
ENSMUSG00000027006	Dnajc10	ENSMUSG00000071669	Snx29
ENSMUSG00000027012	Dync1i2	ENSMUSG00000071748	Styx-ps
ENSMUSG00000027030	Stk39	ENSMUSG00000071855	Ccdc112
ENSMUSG00000027067	Ssrp1	ENSMUSG00000071890	Mroh9
ENSMUSG00000027071	P2rx3	ENSMUSG00000072188	Gm10354
ENSMUSG00000027077	Smtnl1	ENSMUSG00000072214	Septin5
ENSMUSG00000027080	Med19	ENSMUSG00000072258	Taf1a
ENSMUSG00000027086	Fastkd1	ENSMUSG00000072295	C2cd6
ENSMUSG00000027088	Phospho2	ENSMUSG00000072487	Mroh5
ENSMUSG00000027091	Zc3h15	ENSMUSG00000072501	Phf20l1
ENSMUSG00000027102	Hoxd8	ENSMUSG00000072647	Adam1a
ENSMUSG00000027108	Ola1	ENSMUSG00000072663	Spef2
ENSMUSG00000027130	Slc12a6	ENSMUSG00000072692	Rpl37rt
ENSMUSG00000027157	Potefam1	ENSMUSG00000072694	1500011B03Rik
ENSMUSG00000027160	Ccdc34	ENSMUSG00000072720	Myo18b
ENSMUSG00000027162	Lin7c	ENSMUSG00000072722	Ccdc121rt2
ENSMUSG00000027165	Iftap	ENSMUSG00000072723	Gm10044
ENSMUSG00000027176	Cstf3	ENSMUSG00000072770	Acrbp
ENSMUSG00000027180	Fbxo3	ENSMUSG00000072878	1700123L14Rik
ENSMUSG00000027184	Caprin1	ENSMUSG00000072889	Nfxl1
ENSMUSG00000027185	Nat10	ENSMUSG00000072915	Gm12258
ENSMUSG00000027189	Trim44	ENSMUSG00000072952	Gm5878
ENSMUSG00000027201	Myef2	ENSMUSG00000072964	Bhlhb9
ENSMUSG00000027209	Fam227b	ENSMUSG00000072966	Gprasp2
ENSMUSG00000027227	Sord	ENSMUSG00000072974	Gm4787
ENSMUSG00000027236	Eif3j1	ENSMUSG00000073001	Cylc1
ENSMUSG00000027245	Hypk	ENSMUSG00000073079	Srp54a
ENSMUSG00000027248	Pdia3	ENSMUSG00000073102	Drc1
ENSMUSG00000027276	Jag1	ENSMUSG00000073117	Gm7347
ENSMUSG00000027281	Slx4ip	ENSMUSG00000073141	4930567H17Rik
ENSMUSG00000027282	Mtch2	ENSMUSG00000073208	Speer4c
ENSMUSG00000027284	Cdan1	ENSMUSG00000073293	Nudt10
ENSMUSG00000027286	Lrrc57	ENSMUSG00000073295	Nudt11
ENSMUSG00000027287	Snap23	ENSMUSG00000073430	Gm10505
ENSMUSG00000027288	Zfp106	ENSMUSG00000073471	Rsph3a
ENSMUSG00000027304	Rtf1	ENSMUSG00000073514	Dok6
ENSMUSG00000027306	Nusap1	ENSMUSG00000073551	Spink13
ENSMUSG00000027309	Dnaaf9	ENSMUSG00000073554	Gm6960
ENSMUSG00000027326	Knl1	ENSMUSG00000073557	Ppp1r12b
ENSMUSG00000027331	Knstrn	ENSMUSG00000073640	Rpl27-ps3
ENSMUSG00000027344	Fsip1	ENSMUSG00000073643	Wdfy1
ENSMUSG00000027346	Gpcpd1	ENSMUSG00000073647	Gm10557
ENSMUSG00000027350	Chgb	ENSMUSG00000073650	Catip
ENSMUSG00000027355	Tmco5	ENSMUSG00000073716	Gm13241
ENSMUSG00000027363	Usp8	ENSMUSG00000073722	4931408C20Rik
ENSMUSG00000027365	Trpm7	ENSMUSG00000073725	Lmbrd1
ENSMUSG00000027366	Sppl2a	ENSMUSG00000073730	Ppp1r14bl
ENSMUSG00000027374	Mrps5	ENSMUSG00000073758	Sh3d21
ENSMUSG00000027378	Nphp1	ENSMUSG00000073761	4933427I04Rik
ENSMUSG00000027404	Snrpb	ENSMUSG00000073888	Ccl27a
ENSMUSG00000027405	Nop56	ENSMUSG00000074030	Exoc8
ENSMUSG00000027422	Rrbp1	ENSMUSG00000074067	Gm10619
ENSMUSG00000027433	Xrn2	ENSMUSG00000074088	Snrnp40
ENSMUSG00000027439	Gzf1	ENSMUSG00000074093	Svip
ENSMUSG00000027442	Cst8	ENSMUSG00000074129	Rpl13a
ENSMUSG00000027443	Cst12	ENSMUSG00000074139	1700057G04Rik
ENSMUSG00000027445	Cst9	ENSMUSG00000074149	Gm10634
ENSMUSG00000027447	Cst3	ENSMUSG00000074182	Znhit6
ENSMUSG00000027455	Nsfl1c	ENSMUSG00000074212	Dnajb14
ENSMUSG00000027469	Tpx2	ENSMUSG00000074220	Zfp382
ENSMUSG00000027475	Kif3b	ENSMUSG00000074224	Wdr87-ps
ENSMUSG00000027480	Sun5	ENSMUSG00000074305	Peak1
ENSMUSG00000027502	Rtf2	ENSMUSG00000074340	Ovgp1
ENSMUSG00000027517	Ankrd60	ENSMUSG00000074404	Gm1698
ENSMUSG00000027520	Zdbf2	ENSMUSG00000074435	Smcp
ENSMUSG00000027522	Stx16	ENSMUSG00000074579	Lekr1
ENSMUSG00000027525	Phactr3	ENSMUSG00000074582	Arfgef2
ENSMUSG00000027528	Fabp9	ENSMUSG00000074589	4930449A18Rik
ENSMUSG00000027531	Impa1	ENSMUSG00000074619	1700034I23Rik
ENSMUSG00000027550	Lrrcc1	ENSMUSG00000074620	Gm10731
ENSMUSG00000027562	Car2	ENSMUSG00000074656	Eif2s2
ENSMUSG00000027569	Mrgbp	ENSMUSG00000074673	Ttll9
ENSMUSG00000027575	Arfgap1	ENSMUSG00000074734	Taf7l2
ENSMUSG00000027582	Zgpat	ENSMUSG00000074746	Pdzd8
ENSMUSG00000027593	Raly	ENSMUSG00000074748	Atxn7l3b
ENSMUSG00000027596	a	ENSMUSG00000074749	Kiz
ENSMUSG00000027601	Mtfr1	ENSMUSG00000074764	Sel1l2
ENSMUSG00000027602	Map1lc3a	ENSMUSG00000074771	Ankef1
ENSMUSG00000027605	Acss2	ENSMUSG00000074780	Anapc15-ps
ENSMUSG00000027606	Dnajc5b	ENSMUSG00000074785	Plxnc1
ENSMUSG00000027620	Rbm39	ENSMUSG00000074812	Spdye4c
ENSMUSG00000027630	Tbl1xr1	ENSMUSG00000074817	Papolb
ENSMUSG00000027642	Rpn2	ENSMUSG00000074884	Serf2
ENSMUSG00000027649	Ctnnbl1	ENSMUSG00000074903	Gm2058
ENSMUSG00000027668	Mfn1	ENSMUSG00000074978	Actg-ps1
ENSMUSG00000027671	Actl6a	ENSMUSG00000075053	Vdac3-ps1
ENSMUSG00000027676	Ccdc39	ENSMUSG00000075232	Amd1
ENSMUSG00000027677	Ttc14	ENSMUSG00000075249	Fsip2
ENSMUSG00000027680	Fxr1	ENSMUSG00000075268	Gm10819
ENSMUSG00000027692	Tnik	ENSMUSG00000075271	Ttc30a1
ENSMUSG00000027694	Gm8325	ENSMUSG00000075272	Ttc30a2
ENSMUSG00000027699	Ect2	ENSMUSG00000075302	Erich2
ENSMUSG00000027703	Lrriq4	ENSMUSG00000075376	Rc3h2
ENSMUSG00000027706	Sec62	ENSMUSG00000075415	Fnbp1
ENSMUSG00000027708	Dcun1d1	ENSMUSG00000075511	1700001L05Rik
ENSMUSG00000027714	Exosc9	ENSMUSG00000075524	4930407I10Rik
ENSMUSG00000027719	Adad1	ENSMUSG00000075528	Aarsd1
ENSMUSG00000027722	Spata5	ENSMUSG00000075569	Rsph10b
ENSMUSG00000027751	Supt20	ENSMUSG00000075581	Gm16409
ENSMUSG00000027770	Dhx36	ENSMUSG00000075590	Nrbp2
ENSMUSG00000027778	Ift80	ENSMUSG00000075595	Zfp652
ENSMUSG00000027782	Kpna4	ENSMUSG00000075701	Selenos
ENSMUSG00000027799	Nbea	ENSMUSG00000075706	Gpx4
ENSMUSG00000027804	Ppid	ENSMUSG00000075918	None
ENSMUSG00000027823	Gmps	ENSMUSG00000076433	Cep295nl
ENSMUSG00000027849	Syt6	ENSMUSG00000076436	Oxct2a
ENSMUSG00000027855	Sycp1	ENSMUSG00000077323	Rnu11
ENSMUSG00000027867	Spag17	ENSMUSG00000077457	Snord65
ENSMUSG00000027871	Hsd3b1	ENSMUSG00000077549	Snord71
ENSMUSG00000027881	Prpf38b	ENSMUSG00000077734	Snord83b
ENSMUSG00000027886	Cfap276	ENSMUSG00000078127	Fam170b
ENSMUSG00000027893	Ahcyl1	ENSMUSG00000078161	Erich3
ENSMUSG00000027931	Npr1	ENSMUSG00000078184	Rbm8a2
ENSMUSG00000027935	Rab13	ENSMUSG00000078427	Sarnp
ENSMUSG00000027938	Creb3l4	ENSMUSG00000078439	Smim24
ENSMUSG00000027940	Tpm3	ENSMUSG00000078442	Ccdc105
ENSMUSG00000027959	Sass6	ENSMUSG00000078451	Ppil6
ENSMUSG00000027968	Larp7	ENSMUSG00000078489	Gm17106
ENSMUSG00000027981	Rnpc3	ENSMUSG00000078490	Cfap74
ENSMUSG00000028010	Gar1	ENSMUSG00000078554	Fam229a
ENSMUSG00000028028	Alpk1	ENSMUSG00000078570	1110065P20Rik
ENSMUSG00000028033	Kcnq5	ENSMUSG00000078577	Tmco2
ENSMUSG00000028034	Fubp1	ENSMUSG00000078578	Ube2d3
ENSMUSG00000028035	Dnajb4	ENSMUSG00000078611	Gm5901
ENSMUSG00000028047	Thbs3	ENSMUSG00000078612	Fyb2
ENSMUSG00000028053	Ash1l	ENSMUSG00000078622	Ccdc47
ENSMUSG00000028059	Arhgef2	ENSMUSG00000078627	Marchf10
ENSMUSG00000028060	Khdc4	ENSMUSG00000078632	Lrrc37a
ENSMUSG00000028069	Gpatch4	ENSMUSG00000078652	Psme3
ENSMUSG00000028073	Pear1	ENSMUSG00000078653	Cntd1
ENSMUSG00000028081	Rps3a1	ENSMUSG00000078671	Chd2
ENSMUSG00000028086	Fbxw7	ENSMUSG00000078676	Casc3
ENSMUSG00000028089	Chd1l	ENSMUSG00000078684	5830417I10Rik
ENSMUSG00000028099	Polr3c	ENSMUSG00000078812	Eif5a
ENSMUSG00000028104	Polr3gl	ENSMUSG00000078813	Leng1
ENSMUSG00000028109	Hormad1	ENSMUSG00000078907	Fam186b
ENSMUSG00000028126	Pip5k1a	ENSMUSG00000078937	Cpt1b
ENSMUSG00000028127	Abcd3	ENSMUSG00000078941	Ak6
ENSMUSG00000028136	Snx27	ENSMUSG00000079003	Samd1
ENSMUSG00000028137	Celf3	ENSMUSG00000079005	Gm14147
ENSMUSG00000028139	Riiad1	ENSMUSG00000079006	Gm14151
ENSMUSG00000028141	Oaz3	ENSMUSG00000079019	Insl3
ENSMUSG00000028156	Eif4e	ENSMUSG00000079022	Col22a1
ENSMUSG00000028180	Zranb2	ENSMUSG00000079067	Hmgn2-ps1
ENSMUSG00000028182	Lrriq3	ENSMUSG00000079084	Ccdc82
ENSMUSG00000028188	Spata1	ENSMUSG00000079104	Prps1l3
ENSMUSG00000028218	Cibar1	ENSMUSG00000079105	C7
ENSMUSG00000028224	Nbn	ENSMUSG00000079108	Srp54c
ENSMUSG00000028234	Rps20	ENSMUSG00000079139	Gm4204
ENSMUSG00000028248	Pnisr	ENSMUSG00000079169	Gm15130
ENSMUSG00000028274	Rngtt	ENSMUSG00000079170	Gm13941
ENSMUSG00000028277	Ube2j1	ENSMUSG00000079173	Zan
ENSMUSG00000028282	Casp8ap2	ENSMUSG00000079177	Fam228a
ENSMUSG00000028294	Cfap206	ENSMUSG00000079184	Mphosph8
ENSMUSG00000028309	Rnf20	ENSMUSG00000079225	Gm9531
ENSMUSG00000028312	Smc2	ENSMUSG00000079235	Ccdc13
ENSMUSG00000028328	Tmod1	ENSMUSG00000079324	4932414N04Rik
ENSMUSG00000028329	Xpa	ENSMUSG00000079407	1700110I01Rik
ENSMUSG00000028330	Ncbp1	ENSMUSG00000079429	Mroh2a
ENSMUSG00000028332	Hemgn	ENSMUSG00000079465	Col4a3
ENSMUSG00000028333	Anp32b	ENSMUSG00000079470	Utp14b
ENSMUSG00000028347	Tmeff1	ENSMUSG00000079523	Tmsb10
ENSMUSG00000028383	Hsdl2	ENSMUSG00000079547	H2-DMb1
ENSMUSG00000028389	Zfp37	ENSMUSG00000079562	Maea
ENSMUSG00000028392	Bspry	ENSMUSG00000079579	Gm6760
ENSMUSG00000028394	Pole3	ENSMUSG00000079606	Fsip2l
ENSMUSG00000028397	Kdm4c	ENSMUSG00000079608	Stard6
ENSMUSG00000028399	Ptprd	ENSMUSG00000079652	Garin1a
ENSMUSG00000028409	Smu1	ENSMUSG00000079707	Dynlt2a1
ENSMUSG00000028410	Dnaja1	ENSMUSG00000079710	Dynlt2a2
ENSMUSG00000028411	Aptx	ENSMUSG00000079884	Tmed2b
ENSMUSG00000028416	Bag1	ENSMUSG00000080021	Gm5915
ENSMUSG00000028419	Chmp5	ENSMUSG00000080152	H3f4
ENSMUSG00000028426	Rad23b	ENSMUSG00000080237	Gm14239
ENSMUSG00000028430	Nol6	ENSMUSG00000080268	Brms1
ENSMUSG00000028431	Elp1	ENSMUSG00000080486	None
ENSMUSG00000028433	Ubap2	ENSMUSG00000080615	Snord99
ENSMUSG00000028441	1110017D15Rik	ENSMUSG00000080719	Gm15532
ENSMUSG00000028456	Unc13b	ENSMUSG00000080775	Gm6368
ENSMUSG00000028457	Atp8b5	ENSMUSG00000080776	Gm12174
ENSMUSG00000028458	Tesk1	ENSMUSG00000080778	Gm7199
ENSMUSG00000028464	Tpm2	ENSMUSG00000080806	Gm13005
ENSMUSG00000028478	Clta	ENSMUSG00000080860	Gm13815
ENSMUSG00000028484	Psip1	ENSMUSG00000080875	Gm7332
ENSMUSG00000028494	Plin2	ENSMUSG00000080902	Ywhaq-ps3
ENSMUSG00000028495	Rps6	ENSMUSG00000080968	Atf1-ps
ENSMUSG00000028496	Mllt3	ENSMUSG00000080974	Gm9009
ENSMUSG00000028514	Usp24	ENSMUSG00000081002	Gm14240
ENSMUSG00000028519	Dab1	ENSMUSG00000081044	AU015836
ENSMUSG00000028520	4921539E11Rik	ENSMUSG00000081046	Gm12846
ENSMUSG00000028522	Mier1	ENSMUSG00000081068	Gm12804
ENSMUSG00000028530	Jak1	ENSMUSG00000081087	Rps15a-ps7
ENSMUSG00000028533	Izumo3	ENSMUSG00000081094	Rpl19-ps11
ENSMUSG00000028549	Itgb3bp	ENSMUSG00000081104	Gm15989
ENSMUSG00000028551	Cdkn2c	ENSMUSG00000081111	Gm5913
ENSMUSG00000028552	Eps15	ENSMUSG00000081113	Gm7308
ENSMUSG00000028555	Ttc39a	ENSMUSG00000081125	Rpl26-ps5
ENSMUSG00000028558	Calr4	ENSMUSG00000081128	Gm13328
ENSMUSG00000028559	Osbpl9	ENSMUSG00000081151	Gm11448
ENSMUSG00000028560	Usp1	ENSMUSG00000081152	Gm12430
ENSMUSG00000028568	Btf3l4	ENSMUSG00000081159	Gm6023
ENSMUSG00000028572	Hook1	ENSMUSG00000081185	Gm4852
ENSMUSG00000028575	Eqtn	ENSMUSG00000081226	Gm8802
ENSMUSG00000028576	Ift74	ENSMUSG00000081227	Gm13082
ENSMUSG00000028577	Plaa	ENSMUSG00000081242	Gm15719
ENSMUSG00000028580	Pum1	ENSMUSG00000081243	Gm14037
ENSMUSG00000028582	Cc2d1b	ENSMUSG00000081281	Rpl7-ps9
ENSMUSG00000028607	Cpt2	ENSMUSG00000081289	Gm14857
ENSMUSG00000028613	Lrp8	ENSMUSG00000081302	Gm12020
ENSMUSG00000028617	Lrrc42	ENSMUSG00000081325	Gm12599
ENSMUSG00000028629	Exo5	ENSMUSG00000081352	Gm12389
ENSMUSG00000028637	Ccdc30	ENSMUSG00000081413	Uqcrh-ps2
ENSMUSG00000028639	Ybx1	ENSMUSG00000081434	Gm14165
ENSMUSG00000028643	Svbp	ENSMUSG00000081528	Gm12924
ENSMUSG00000028649	Macf1	ENSMUSG00000081552	Gm12328
ENSMUSG00000028668	Eloa	ENSMUSG00000081553	Ccdc50-ps
ENSMUSG00000028676	Srsf10	ENSMUSG00000081557	Gm5697
ENSMUSG00000028677	Rnf220	ENSMUSG00000081583	Gm14769
ENSMUSG00000028678	Kif2c	ENSMUSG00000081595	Gm13036
ENSMUSG00000028689	Ccdc163	ENSMUSG00000081603	Gm14681
ENSMUSG00000028693	Nasp	ENSMUSG00000081606	Gm9059
ENSMUSG00000028698	Pik3r3	ENSMUSG00000081623	Gm8809
ENSMUSG00000028700	Pomgnt1	ENSMUSG00000081627	Gm13158
ENSMUSG00000028729	Ebna1bp2	ENSMUSG00000081633	Gm8522
ENSMUSG00000028730	Cfap57	ENSMUSG00000081647	Gm13022
ENSMUSG00000028745	Capzb	ENSMUSG00000081656	Gm11246
ENSMUSG00000028758	Kif17	ENSMUSG00000081657	Gm15466
ENSMUSG00000028759	Hp1bp3	ENSMUSG00000081662	Gm14098
ENSMUSG00000028760	Eif4g3	ENSMUSG00000081670	Gm15697
ENSMUSG00000028793	Rnf19b	ENSMUSG00000081671	Gm13167
ENSMUSG00000028795	Ccdc28b	ENSMUSG00000081681	Gm14868
ENSMUSG00000028809	Srrm1	ENSMUSG00000081700	Atp5k-ps2
ENSMUSG00000028820	Sfpq	ENSMUSG00000081703	Gm6285
ENSMUSG00000028821	Syf2	ENSMUSG00000081729	Hspa9-ps1
ENSMUSG00000028826	Maco1	ENSMUSG00000081731	Calr-ps
ENSMUSG00000028832	Stmn1	ENSMUSG00000081788	Gm5898
ENSMUSG00000028845	Tekt2	ENSMUSG00000081789	Gm11893
ENSMUSG00000028849	Map7d1	ENSMUSG00000081792	Anp32b-ps1
ENSMUSG00000028850	Gpatch3	ENSMUSG00000081865	Gm15484
ENSMUSG00000028851	Nudc	ENSMUSG00000081871	Gm11488
ENSMUSG00000028863	Meaf6	ENSMUSG00000081885	Gm13231
ENSMUSG00000028868	Wasf2	ENSMUSG00000081887	Gm12097
ENSMUSG00000028869	Gnl2	ENSMUSG00000081888	Spcs2-ps
ENSMUSG00000028873	Cdca8	ENSMUSG00000081975	Gm12482
ENSMUSG00000028878	Fam76a	ENSMUSG00000081984	Dnajb3
ENSMUSG00000028896	Rcc1	ENSMUSG00000081992	Gm13408
ENSMUSG00000028899	Taf12	ENSMUSG00000082013	Gm13216
ENSMUSG00000028901	Gmeb1	ENSMUSG00000082043	Gm12848
ENSMUSG00000028902	Sf3a3	ENSMUSG00000082051	Gm16072
ENSMUSG00000028911	Srsf4	ENSMUSG00000082064	Rpl5-ps2
ENSMUSG00000028917	Plekhm2	ENSMUSG00000082078	Gm12098
ENSMUSG00000028932	Psmc2	ENSMUSG00000082100	Glns-ps1
ENSMUSG00000028936	Rpl22	ENSMUSG00000082117	Gm4994
ENSMUSG00000028937	Acot7	ENSMUSG00000082120	Gm15720
ENSMUSG00000028938	Galntl5	ENSMUSG00000082145	Gm12312
ENSMUSG00000028943	Espn	ENSMUSG00000082154	Gm16464
ENSMUSG00000028944	Prkag2	ENSMUSG00000082178	Gm11307
ENSMUSG00000028953	Abcf2	ENSMUSG00000082179	Gm11407
ENSMUSG00000028954	Nub1	ENSMUSG00000082194	Gm12444
ENSMUSG00000028962	Slc4a2	ENSMUSG00000082195	Gm13034
ENSMUSG00000028976	Slc2a5	ENSMUSG00000082253	Gm14639
ENSMUSG00000028991	Mtor	ENSMUSG00000082272	Gm11675
ENSMUSG00000028995	Fam126a	ENSMUSG00000082320	Gm11877
ENSMUSG00000028998	Tomm7	ENSMUSG00000082325	Gm12642
ENSMUSG00000029001	Fbxo44	ENSMUSG00000082348	Gm12807
ENSMUSG00000029003	Mad2l2	ENSMUSG00000082381	Gm12928
ENSMUSG00000029004	Kmt2e	ENSMUSG00000082419	Gm11425
ENSMUSG00000029009	Mthfr	ENSMUSG00000082454	Gm12183
ENSMUSG00000029014	Dnajc2	ENSMUSG00000082461	Gm8844
ENSMUSG00000029017	Pmpcb	ENSMUSG00000082491	Gm5909
ENSMUSG00000029020	Mfn2	ENSMUSG00000082530	Gm12168
ENSMUSG00000029022	Miip	ENSMUSG00000082536	Gm13456
ENSMUSG00000029028	Lrrc47	ENSMUSG00000082575	Eef2-ps2
ENSMUSG00000029036	Atad3a	ENSMUSG00000082625	Gm15204
ENSMUSG00000029038	Ssu72	ENSMUSG00000082652	Gm14725
ENSMUSG00000029048	Rer1	ENSMUSG00000082691	Dynlt1-ps1
ENSMUSG00000029062	Cdk11b	ENSMUSG00000082715	Gm11633
ENSMUSG00000029066	Mrpl20	ENSMUSG00000082774	Gm8805
ENSMUSG00000029068	Ccnl2	ENSMUSG00000082791	Gm4875
ENSMUSG00000029071	Dvl1	ENSMUSG00000082810	Gm8682
ENSMUSG00000029074	Ttll10	ENSMUSG00000082820	Gm13803
ENSMUSG00000029076	Sdf4	ENSMUSG00000082836	Gm13612
ENSMUSG00000029086	Prom1	ENSMUSG00000082872	Gm15773
ENSMUSG00000029094	Afap1	ENSMUSG00000082876	Gm11889
ENSMUSG00000029103	Lrpap1	ENSMUSG00000082878	Gm12583
ENSMUSG00000029110	Rnf4	ENSMUSG00000082896	Gm5844
ENSMUSG00000029119	Man2b2	ENSMUSG00000082930	Gm13462
ENSMUSG00000029125	Stx18	ENSMUSG00000082938	Gm2810
ENSMUSG00000029128	Rab28	ENSMUSG00000082971	Gm13517
ENSMUSG00000029130	Rnf32	ENSMUSG00000082998	Gm11221
ENSMUSG00000029131	Dnajb6	ENSMUSG00000083022	Rps15a-ps6
ENSMUSG00000029134	Plb1	ENSMUSG00000083027	Gm13140
ENSMUSG00000029138	Ccdc121	ENSMUSG00000083064	Gm7785
ENSMUSG00000029141	Slc4a1ap	ENSMUSG00000083081	Gm13223
ENSMUSG00000029145	Eif2b4	ENSMUSG00000083166	Gm8648
ENSMUSG00000029147	Ppm1g	ENSMUSG00000083175	Gm12206
ENSMUSG00000029148	Nrbp1	ENSMUSG00000083179	Gm12693
ENSMUSG00000029155	Spata18	ENSMUSG00000083218	Gm16425
ENSMUSG00000029165	Agbl5	ENSMUSG00000083240	Gm13453
ENSMUSG00000029166	Mapre3	ENSMUSG00000083242	Gm15659
ENSMUSG00000029169	Dhx15	ENSMUSG00000083258	Gm5939
ENSMUSG00000029174	Tbc1d1	ENSMUSG00000083261	Gm7816
ENSMUSG00000029176	Anapc4	ENSMUSG00000083270	Gm13498
ENSMUSG00000029186	Pi4k2b	ENSMUSG00000083307	AA414768
ENSMUSG00000029191	Rfc1	ENSMUSG00000083325	Gm14121
ENSMUSG00000029192	Tbc1d14	ENSMUSG00000083326	Rpl38-ps1
ENSMUSG00000029196	Tada2b	ENSMUSG00000083327	Vcp-rs
ENSMUSG00000029201	Ugdh	ENSMUSG00000083338	Gm12475
ENSMUSG00000029202	Pds5a	ENSMUSG00000083346	Gm8260
ENSMUSG00000029203	Ube2k	ENSMUSG00000083367	Gm8806
ENSMUSG00000029206	Nsun7	ENSMUSG00000083392	Gm6335
ENSMUSG00000029212	Gabrb1	ENSMUSG00000083396	Gm15542
ENSMUSG00000029223	Uchl1	ENSMUSG00000083429	Gm15198
ENSMUSG00000029227	Fip1l1	ENSMUSG00000083438	Gm5402
ENSMUSG00000029229	Chic2	ENSMUSG00000083453	Gm13338
ENSMUSG00000029235	Pdcl2	ENSMUSG00000083496	Gm11263
ENSMUSG00000029238	Clock	ENSMUSG00000083512	Gm12749
ENSMUSG00000029249	Rest	ENSMUSG00000083536	Gm15808
ENSMUSG00000029250	Polr2b	ENSMUSG00000083562	Gm13234
ENSMUSG00000029267	Mtf2	ENSMUSG00000083563	Gm13340
ENSMUSG00000029276	Glmn	ENSMUSG00000083579	Gm15538
ENSMUSG00000029279	Brdt	ENSMUSG00000083621	Gm14586
ENSMUSG00000029290	Zfp326	ENSMUSG00000083640	Gm8876
ENSMUSG00000029291	Rufy3	ENSMUSG00000083692	Gm9575
ENSMUSG00000029309	Sparcl1	ENSMUSG00000083720	Gm12901
ENSMUSG00000029310	Nudt9	ENSMUSG00000083736	Gm6039
ENSMUSG00000029314	Gpat3	ENSMUSG00000083815	Gm13435
ENSMUSG00000029320	1700016H13Rik	ENSMUSG00000083829	Gm2199
ENSMUSG00000029328	Hnrnpdl	ENSMUSG00000083830	Gm8839
ENSMUSG00000029345	Tfip11	ENSMUSG00000083834	Gm12577
ENSMUSG00000029381	Shroom3	ENSMUSG00000083838	Gm11957
ENSMUSG00000029389	Ddx55	ENSMUSG00000083890	Gm15703
ENSMUSG00000029390	Tmed2	ENSMUSG00000083899	Gm12346
ENSMUSG00000029402	Snrnp35	ENSMUSG00000083911	Gm4342
ENSMUSG00000029403	Cdkl2	ENSMUSG00000083912	Gm5391
ENSMUSG00000029404	Arl6ip4	ENSMUSG00000083928	Gm4991
ENSMUSG00000029406	Pitpnm2	ENSMUSG00000083937	Cct3-ps1
ENSMUSG00000029415	Sdad1	ENSMUSG00000083992	Gm11478
ENSMUSG00000029422	Rsrc2	ENSMUSG00000084006	Gm14245
ENSMUSG00000029423	Piwil1	ENSMUSG00000084067	Gm14269
ENSMUSG00000029427	Zcchc8	ENSMUSG00000084073	Gm11910
ENSMUSG00000029428	Stx2	ENSMUSG00000084077	Gm11952
ENSMUSG00000029430	Ran	ENSMUSG00000084081	Gm12057
ENSMUSG00000029433	Diablo	ENSMUSG00000084083	Gm15782
ENSMUSG00000029439	Sfswap	ENSMUSG00000084094	Gm13961
ENSMUSG00000029440	Psmd9	ENSMUSG00000084098	Gm13422
ENSMUSG00000029442	Wdr66	ENSMUSG00000084145	Gm12263
ENSMUSG00000029447	Cct6a	ENSMUSG00000084153	Gm12186
ENSMUSG00000029458	Brap	ENSMUSG00000084159	Gm12696
ENSMUSG00000029463	Fam216a	ENSMUSG00000084166	Gm6451
ENSMUSG00000029467	Atp2a2	ENSMUSG00000084183	Gm12009
ENSMUSG00000029469	Ift81	ENSMUSG00000084184	Gm13474
ENSMUSG00000029472	Anapc5	ENSMUSG00000084274	Ptma-ps2
ENSMUSG00000029474	Rnf34	ENSMUSG00000084279	Gm13232
ENSMUSG00000029475	Kdm2b	ENSMUSG00000084314	Rps15a-ps3
ENSMUSG00000029477	Morn3	ENSMUSG00000084342	Gm11224
ENSMUSG00000029478	Ncor2	ENSMUSG00000084378	Gm15238
ENSMUSG00000029502	Golga3	ENSMUSG00000084390	Gm15425
ENSMUSG00000029505	Ep400	ENSMUSG00000084729	Gm24139
ENSMUSG00000029516	Cit	ENSMUSG00000084780	Gm15350
ENSMUSG00000029528	Pxn	ENSMUSG00000084804	1700095J12Rik
ENSMUSG00000029538	Srsf9	ENSMUSG00000084817	Gm5526
ENSMUSG00000029544	Cabp1	ENSMUSG00000084833	Gm12649
ENSMUSG00000029547	Ints1	ENSMUSG00000084897	Gm14226
ENSMUSG00000029552	Tes	ENSMUSG00000084899	Gm15344
ENSMUSG00000029554	Mad1l1	ENSMUSG00000084948	1700061H18Rik
ENSMUSG00000029564	4930519G04Rik	ENSMUSG00000085006	BC021767
ENSMUSG00000029576	Radil	ENSMUSG00000085016	Gm11335
ENSMUSG00000029580	Actb	ENSMUSG00000085172	Gm6542
ENSMUSG00000029594	Rbm19	ENSMUSG00000085253	Gm16833
ENSMUSG00000029598	Plbd2	ENSMUSG00000085260	Med9os
ENSMUSG00000029599	Ddx54	ENSMUSG00000085278	Gm12841
ENSMUSG00000029601	Iqcd	ENSMUSG00000085486	Gm11634
ENSMUSG00000029616	Erp29	ENSMUSG00000085491	4930527E20Rik
ENSMUSG00000029617	Ccz1	ENSMUSG00000085757	Tslrn1
ENSMUSG00000029623	Pdap1	ENSMUSG00000085931	Gm12648
ENSMUSG00000029629	Phf14	ENSMUSG00000086046	1700095A21Rik
ENSMUSG00000029634	Rnf6	ENSMUSG00000086148	Gm15271
ENSMUSG00000029635	Cdk8	ENSMUSG00000086157	Gm14643
ENSMUSG00000029640	Usp12	ENSMUSG00000086175	Gm15802
ENSMUSG00000029642	Polr1d	ENSMUSG00000086229	Gm4887
ENSMUSG00000029647	Pan3	ENSMUSG00000086290	Snhg12
ENSMUSG00000029655	N4bp2l2	ENSMUSG00000086324	Gm15564
ENSMUSG00000029670	Ing3	ENSMUSG00000086379	1700026D11Rik
ENSMUSG00000029686	Cul1	ENSMUSG00000086459	1700030C12Rik
ENSMUSG00000029687	Ezh2	ENSMUSG00000086537	Gnasas1
ENSMUSG00000029701	Rbm28	ENSMUSG00000086654	Gm13165
ENSMUSG00000029705	Cux1	ENSMUSG00000086688	Gm11560
ENSMUSG00000029708	Gcc1	ENSMUSG00000086724	Gm12833
ENSMUSG00000029714	Gigyf1	ENSMUSG00000086732	Gm6117
ENSMUSG00000029718	Pcolce	ENSMUSG00000086788	1700029M20Rik
ENSMUSG00000029720	Gm20605	ENSMUSG00000086790	Gm12911
ENSMUSG00000029729	Zkscan1	ENSMUSG00000086841	2410006H16Rik
ENSMUSG00000029730	Mcm7	ENSMUSG00000086842	Gm15681
ENSMUSG00000029752	Asns	ENSMUSG00000086918	4930429F24Rik
ENSMUSG00000029761	Cald1	ENSMUSG00000086922	Gm13835
ENSMUSG00000029767	Calu	ENSMUSG00000086923	4930406D18Rik
ENSMUSG00000029769	Ccdc136	ENSMUSG00000086951	1700051A21Rik
ENSMUSG00000029772	Ahcyl2	ENSMUSG00000087104	Tmem132cos
ENSMUSG00000029784	Ssmem1	ENSMUSG00000087122	4930403D09Rik
ENSMUSG00000029817	Tra2a	ENSMUSG00000087153	Gm6483
ENSMUSG00000029823	Luc7l2	ENSMUSG00000087162	Gm14244
ENSMUSG00000029828	4921507P07Rik	ENSMUSG00000087177	E130307A14Rik
ENSMUSG00000029833	Trim24	ENSMUSG00000087202	Gm15813
ENSMUSG00000029848	Stra8	ENSMUSG00000087204	1700073E17Rik
ENSMUSG00000029875	Ccdc184	ENSMUSG00000087233	Gm43213
ENSMUSG00000029883	Prss59	ENSMUSG00000087479	Gm16835
ENSMUSG00000029909	Prss37	ENSMUSG00000087526	Gm15738
ENSMUSG00000029917	Qrfprl	ENSMUSG00000087635	Gm13414
ENSMUSG00000029920	Smarcad1	ENSMUSG00000088294	None
ENSMUSG00000029922	Mkrn1	ENSMUSG00000088524	Snord2
ENSMUSG00000029992	Gfpt1	ENSMUSG00000088948	Gm23262
ENSMUSG00000030007	Cct7	ENSMUSG00000089357	Mir2137
ENSMUSG00000030016	Zfp638	ENSMUSG00000089673	Gm16546
ENSMUSG00000030030	1700003E16Rik	ENSMUSG00000089682	Bcl2l2
ENSMUSG00000030034	Ino80b	ENSMUSG00000089698	Gm2541
ENSMUSG00000030041	M1ap	ENSMUSG00000089717	Olfr275
ENSMUSG00000030051	Aplf	ENSMUSG00000089730	1700007P06Rik
ENSMUSG00000030056	Isy1	ENSMUSG00000089743	Gm16226
ENSMUSG00000030059	Tmf1	ENSMUSG00000089782	Btf3-ps1
ENSMUSG00000030062	Rpn1	ENSMUSG00000089791	Gm3555
ENSMUSG00000030077	Chl1	ENSMUSG00000089808	Gm7241
ENSMUSG00000030122	Ptms	ENSMUSG00000089865	Gm44503
ENSMUSG00000030125	Lrrc23	ENSMUSG00000089887	4930428N03Rik
ENSMUSG00000030126	Tmcc1	ENSMUSG00000089911	Mfsd14a
ENSMUSG00000030127	Cops7a	ENSMUSG00000089945	Pakap
ENSMUSG00000030137	Tuba8	ENSMUSG00000089958	Gm16165
ENSMUSG00000030138	Bms1	ENSMUSG00000089975	Gm7420
ENSMUSG00000030161	Gabarapl1	ENSMUSG00000089984	Fbxo24
ENSMUSG00000030172	Erc1	ENSMUSG00000089988	Gm16238
ENSMUSG00000030177	Ccdc77	ENSMUSG00000089989	Gm45713
ENSMUSG00000030180	Kdm5a	ENSMUSG00000090000	Ier3ip1
ENSMUSG00000030189	Ybx3	ENSMUSG00000090027	Gm15740
ENSMUSG00000030200	Bcl2l14	ENSMUSG00000090077	Lime1
ENSMUSG00000030204	Ddx47	ENSMUSG00000090083	Rnf8
ENSMUSG00000030206	Gsg1	ENSMUSG00000090100	Ttbk2
ENSMUSG00000030213	Atf7ip	ENSMUSG00000090115	Usp49
ENSMUSG00000030216	Wbp11	ENSMUSG00000090119	Gm8185
ENSMUSG00000030224	Strap	ENSMUSG00000090173	Fbxw10
ENSMUSG00000030228	Pik3c2g	ENSMUSG00000090191	9230105E05Rik
ENSMUSG00000030230	Plcz1	ENSMUSG00000090202	4930503B20Rik
ENSMUSG00000030231	Plekha5	ENSMUSG00000090319	Gm4462
ENSMUSG00000030232	Aebp2	ENSMUSG00000090323	Gm5263
ENSMUSG00000030243	Recql	ENSMUSG00000090369	4933411K16Rik
ENSMUSG00000030254	Rad18	ENSMUSG00000090389	Cdv3-ps
ENSMUSG00000030257	Srgap3	ENSMUSG00000090394	4930523C07Rik
ENSMUSG00000030265	Kras	ENSMUSG00000090457	4930571K23Rik
ENSMUSG00000030275	Etnk1	ENSMUSG00000090516	Rps11-ps1
ENSMUSG00000030276	Ttll3	ENSMUSG00000090585	4933406F09Rik
ENSMUSG00000030287	Itpr2	ENSMUSG00000090602	Gm5611
ENSMUSG00000030292	Smco2	ENSMUSG00000090626	Tex9
ENSMUSG00000030301	Ccdc91	ENSMUSG00000090671	Gm5067
ENSMUSG00000030304	Ergic2	ENSMUSG00000090777	Ccdc188
ENSMUSG00000030314	Atg7	ENSMUSG00000090812	Samd15
ENSMUSG00000030321	Efcab12	ENSMUSG00000090816	Gm6729
ENSMUSG00000030323	Ift122	ENSMUSG00000090840	1700092M07Rik
ENSMUSG00000030335	Mrpl51	ENSMUSG00000090841	Myl6
ENSMUSG00000030344	Akap3	ENSMUSG00000090877	Hspa1b
ENSMUSG00000030346	Rad51ap1	ENSMUSG00000090935	Synj2bp
ENSMUSG00000030357	Fkbp4	ENSMUSG00000091002	Tcerg1l
ENSMUSG00000030374	Strn4	ENSMUSG00000091010	Gm17107
ENSMUSG00000030397	Mark4	ENSMUSG00000091017	Garin4
ENSMUSG00000030403	Vasp	ENSMUSG00000091119	Ccdc152
ENSMUSG00000030417	Pdcd5	ENSMUSG00000091255	Speer4e
ENSMUSG00000030421	Uri1	ENSMUSG00000091311	Spata31d1b
ENSMUSG00000030435	U2af2	ENSMUSG00000091337	Eid1
ENSMUSG00000030451	Herc2	ENSMUSG00000091358	Speer5-ps1
ENSMUSG00000030465	Psd3	ENSMUSG00000091415	Ak9
ENSMUSG00000030491	Tdrd12	ENSMUSG00000091416	Gm6327
ENSMUSG00000030498	Gas2	ENSMUSG00000091421	Gm4202
ENSMUSG00000030510	Cers3	ENSMUSG00000091422	Gm6455
ENSMUSG00000030515	Tarsl2	ENSMUSG00000091457	Gm17171
ENSMUSG00000030516	Tjp1	ENSMUSG00000091476	Catspere2
ENSMUSG00000030521	Mphosph10	ENSMUSG00000091537	Tma7
ENSMUSG00000030528	Blm	ENSMUSG00000091556	Gm14569
ENSMUSG00000030534	Vps33b	ENSMUSG00000091561	Gm6665
ENSMUSG00000030536	Iqgap1	ENSMUSG00000091723	Gm17366
ENSMUSG00000030555	Ttc23	ENSMUSG00000091735	Gpr62
ENSMUSG00000030557	Mef2a	ENSMUSG00000091742	Gm5093
ENSMUSG00000030595	Nfkbib	ENSMUSG00000091803	Cox16
ENSMUSG00000030603	Psmc4	ENSMUSG00000091825	Gm5778
ENSMUSG00000030617	Ccdc83	ENSMUSG00000091827	Speer4f2
ENSMUSG00000030619	Eed	ENSMUSG00000091844	Gm8251
ENSMUSG00000030638	Sh3gl3	ENSMUSG00000091896	Ube2d2a
ENSMUSG00000030649	Anapc15	ENSMUSG00000091902	Gm6918
ENSMUSG00000030655	Smg1	ENSMUSG00000091905	Dnajb6-ps
ENSMUSG00000030659	Nucb2	ENSMUSG00000091931	Gon7
ENSMUSG00000030662	Ipo5	ENSMUSG00000091933	Gm8857
ENSMUSG00000030663	1110004F10Rik	ENSMUSG00000091955	Gm9844
ENSMUSG00000030671	Pde3b	ENSMUSG00000091971	Hspa1a
ENSMUSG00000030680	Pagr1a	ENSMUSG00000091993	B930036N10Rik
ENSMUSG00000030688	Stard10	ENSMUSG00000092009	Myh15
ENSMUSG00000030695	Aldoa	ENSMUSG00000092054	Kif4-ps
ENSMUSG00000030718	Ppme1	ENSMUSG00000092056	Gm7289
ENSMUSG00000030726	Pold3	ENSMUSG00000092192	Dnaaf4
ENSMUSG00000030727	Rabep2	ENSMUSG00000092220	Gm20528
ENSMUSG00000030737	Slco2b1	ENSMUSG00000092232	Gm20521
ENSMUSG00000030738	Eif3c	ENSMUSG00000092274	Neat1
ENSMUSG00000030761	Myo7a	ENSMUSG00000092278	Gm8752
ENSMUSG00000030768	Disp1	ENSMUSG00000092305	Prps1l1
ENSMUSG00000030779	Rbbp6	ENSMUSG00000092329	None
ENSMUSG00000030788	Rnf141	ENSMUSG00000092341	Malat1
ENSMUSG00000030792	Dkkl1	ENSMUSG00000092518	Garin5b
ENSMUSG00000030795	Fus	ENSMUSG00000092522	Gm20389
ENSMUSG00000030801	Kat8	ENSMUSG00000092541	Gm20537
ENSMUSG00000030805	Stx4a	ENSMUSG00000092560	Gm8750
ENSMUSG00000030811	Fbxl19	ENSMUSG00000092599	1700010K23Rik
ENSMUSG00000030815	Phkg2	ENSMUSG00000092680	Snord55
ENSMUSG00000030816	Rnf40	ENSMUSG00000092702	Gm24514
ENSMUSG00000030824	Nucb1	ENSMUSG00000092746	Rn7s6
ENSMUSG00000030846	Tial1	ENSMUSG00000092805	Gm26461
ENSMUSG00000030849	Fgfr2	ENSMUSG00000093178	Snord87
ENSMUSG00000030850	Ate1	ENSMUSG00000093183	Gm25687
ENSMUSG00000030851	Ldhc	ENSMUSG00000093383	Gm20642
ENSMUSG00000030877	Mfsd13b	ENSMUSG00000093384	Gm20689
ENSMUSG00000030878	Cdr2	ENSMUSG00000093394	Gm20621
ENSMUSG00000030882	Dnhd1	ENSMUSG00000093445	Lrch4
ENSMUSG00000030887	Pdzd9	ENSMUSG00000093484	Gm20657
ENSMUSG00000030889	Vwa3a	ENSMUSG00000093535	4930533I22Rik
ENSMUSG00000030924	Rexo5	ENSMUSG00000093537	Gm7584
ENSMUSG00000030942	Thumpd1	ENSMUSG00000093545	Gm5871
ENSMUSG00000030965	Abraxas2	ENSMUSG00000093575	Gm20695
ENSMUSG00000030967	Zranb1	ENSMUSG00000093617	4933438K21Rik
ENSMUSG00000030968	Pdilt	ENSMUSG00000093671	Gm20656
ENSMUSG00000030978	Rrm1	ENSMUSG00000093674	Rpl41
ENSMUSG00000030980	Knop1	ENSMUSG00000093752	Gm20716
ENSMUSG00000030983	Bccip	ENSMUSG00000093793	Gm24091
ENSMUSG00000030987	Stim1	ENSMUSG00000093843	Gm25939
ENSMUSG00000030994	D7Ertd443e	ENSMUSG00000093919	Gm20760
ENSMUSG00000031004	Mki67	ENSMUSG00000093956	Gm24497
ENSMUSG00000031010	Usp9x	ENSMUSG00000094017	Gm13160
ENSMUSG00000031015	Swap70	ENSMUSG00000094036	Gm6465
ENSMUSG00000031027	Stk33	ENSMUSG00000094050	Gm23472
ENSMUSG00000031028	Tub	ENSMUSG00000094090	Gm8494
ENSMUSG00000031068	Glrx3	ENSMUSG00000094103	Fam177a2
ENSMUSG00000031075	Ano1	ENSMUSG00000094105	Gm8922
ENSMUSG00000031078	Cttn	ENSMUSG00000094205	Gm8926
ENSMUSG00000031139	Mcf2	ENSMUSG00000094230	Gm21847
ENSMUSG00000031153	Gripap1	ENSMUSG00000094251	Gm25632
ENSMUSG00000031161	Hdac6	ENSMUSG00000094344	Gm11942
ENSMUSG00000031174	Rpgr	ENSMUSG00000094377	Gm24407
ENSMUSG00000031196	F8	ENSMUSG00000094382	Gm22192
ENSMUSG00000031226	Pbdc1	ENSMUSG00000094405	Gm23143
ENSMUSG00000031229	Atrx	ENSMUSG00000094410	Zbed6
ENSMUSG00000031233	Pgk2	ENSMUSG00000094437	Gm9830
ENSMUSG00000031245	Hmgn5	ENSMUSG00000094445	1700015G11Rik
ENSMUSG00000031256	Cstf2	ENSMUSG00000094597	Gm4810
ENSMUSG00000031292	Cdkl5	ENSMUSG00000094638	Gm21972
ENSMUSG00000031303	Map3k15	ENSMUSG00000094812	None
ENSMUSG00000031311	Nono	ENSMUSG00000094826	Gm23804
ENSMUSG00000031314	Taf1	ENSMUSG00000094830	None
ENSMUSG00000031333	Abcb7	ENSMUSG00000094843	Ppp1r2-ps1
ENSMUSG00000031351	Zfp185	ENSMUSG00000094936	Rbm4
ENSMUSG00000031353	Rbbp7	ENSMUSG00000095054	Gm13146
ENSMUSG00000031370	Zrsr2	ENSMUSG00000095110	1700003E24Rik
ENSMUSG00000031371	Haus7	ENSMUSG00000095118	None
ENSMUSG00000031446	Cul4a	ENSMUSG00000095159	Tubb4b-ps1
ENSMUSG00000031451	Gas6	ENSMUSG00000095180	Rhox5
ENSMUSG00000031452	1700029H14Rik	ENSMUSG00000095260	None
ENSMUSG00000031483	Erlin2	ENSMUSG00000095296	Gm8906
ENSMUSG00000031485	Plpbp	ENSMUSG00000095403	Gm21092
ENSMUSG00000031493	Ggn	ENSMUSG00000095464	Gm21987
ENSMUSG00000031502	Col4a1	ENSMUSG00000095469	Gm21965
ENSMUSG00000031503	Col4a2	ENSMUSG00000095513	None
ENSMUSG00000031509	1700016D06Rik	ENSMUSG00000095562	Gm55594
ENSMUSG00000031511	Arhgef7	ENSMUSG00000095567	Noc2l
ENSMUSG00000031518	Spata4	ENSMUSG00000095580	Rnu1b1
ENSMUSG00000031529	Tnks	ENSMUSG00000095595	Fam177a
ENSMUSG00000031533	Mrps31	ENSMUSG00000095676	Gm25099
ENSMUSG00000031536	Polb	ENSMUSG00000095701	None
ENSMUSG00000031540	Kat6a	ENSMUSG00000095710	Gm8871
ENSMUSG00000031545	Gpat4	ENSMUSG00000095738	Gm25313
ENSMUSG00000031552	Adam18	ENSMUSG00000095762	Gm16378
ENSMUSG00000031553	Adam3	ENSMUSG00000095829	Speer1
ENSMUSG00000031554	Adam5	ENSMUSG00000095865	Gm13237
ENSMUSG00000031559	4930555F03Rik	ENSMUSG00000095869	Ppp1r2-ps6
ENSMUSG00000031563	Wwc2	ENSMUSG00000095892	Rnu5g
ENSMUSG00000031575	Ash2l	ENSMUSG00000095895	Gm21963
ENSMUSG00000031578	Mak16	ENSMUSG00000095918	Gm5861
ENSMUSG00000031585	Gtf2e2	ENSMUSG00000095969	Rnu1a1
ENSMUSG00000031590	Frg1	ENSMUSG00000096006	Gm21596
ENSMUSG00000031592	Pcm1	ENSMUSG00000096054	Syne1
ENSMUSG00000031601	Cnot7	ENSMUSG00000096141	Dnah7a
ENSMUSG00000031617	Tmem184c	ENSMUSG00000096153	BC061195
ENSMUSG00000031620	Iqcm	ENSMUSG00000096160	Gm3436
ENSMUSG00000031622	Sin3b	ENSMUSG00000096205	Gm22068
ENSMUSG00000031629	Cenpu	ENSMUSG00000096218	Gm2916
ENSMUSG00000031631	Cfap97	ENSMUSG00000096233	Gm13238
ENSMUSG00000031644	Nek1	ENSMUSG00000096243	Gm24265
ENSMUSG00000031647	Mfap3l	ENSMUSG00000096255	Dynlt1b
ENSMUSG00000031651	Triml1	ENSMUSG00000096263	None
ENSMUSG00000031660	Brd7	ENSMUSG00000096280	Gm23287
ENSMUSG00000031666	Rbl2	ENSMUSG00000096349	Gm22513
ENSMUSG00000031682	1700011L22Rik	ENSMUSG00000096370	Gm21992
ENSMUSG00000031683	Lsm6	ENSMUSG00000096401	Gm21811
ENSMUSG00000031691	Tnpo2	ENSMUSG00000096405	4930474N05Rik
ENSMUSG00000031696	Vps35	ENSMUSG00000096458	Moap1
ENSMUSG00000031697	Orc6	ENSMUSG00000096732	Gm8897
ENSMUSG00000031701	Dnaja2	ENSMUSG00000096740	Lbhd1
ENSMUSG00000031711	Zfp330	ENSMUSG00000096764	Gm21985
ENSMUSG00000031715	Smarca5	ENSMUSG00000096768	Gm47283
ENSMUSG00000031727	Pmfbp1	ENSMUSG00000096793	Gm3002
ENSMUSG00000031728	Zfp821	ENSMUSG00000096838	None
ENSMUSG00000031729	Ist1	ENSMUSG00000096846	Gm8890
ENSMUSG00000031731	Ap1g1	ENSMUSG00000096878	Gm21083
ENSMUSG00000031756	Cenpn	ENSMUSG00000096887	Gm20594
ENSMUSG00000031774	Psme3ip1	ENSMUSG00000096914	Galntl6
ENSMUSG00000031776	Arl2bp	ENSMUSG00000096916	Zfp850
ENSMUSG00000031786	Drc7	ENSMUSG00000097032	4930539J05Rik
ENSMUSG00000031788	Kifc3	ENSMUSG00000097075	Cdiptos
ENSMUSG00000031796	Cfap20	ENSMUSG00000097098	9330111N05Rik
ENSMUSG00000031805	Jak3	ENSMUSG00000097177	9330159M07Rik
ENSMUSG00000031809	1700018B08Rik	ENSMUSG00000097207	6030443J06Rik
ENSMUSG00000031820	Babam1	ENSMUSG00000097239	Gm27029
ENSMUSG00000031831	Dnaaf1	ENSMUSG00000097271	Gm9903
ENSMUSG00000031839	Hsbp1	ENSMUSG00000097375	6720427I07Rik
ENSMUSG00000031843	Mphosph6	ENSMUSG00000097392	Thoc2l
ENSMUSG00000031845	Bco1	ENSMUSG00000097447	Gm26630
ENSMUSG00000031847	1700030J22Rik	ENSMUSG00000097451	Rian
ENSMUSG00000031849	Comp	ENSMUSG00000097494	4933406C10Rik
ENSMUSG00000031851	Ntpcr	ENSMUSG00000097520	4930488L21Rik
ENSMUSG00000031864	Ints10	ENSMUSG00000097772	5430416N02Rik
ENSMUSG00000031865	Dctn1	ENSMUSG00000097901	Gm26680
ENSMUSG00000031878	Nae1	ENSMUSG00000097906	Gm9625
ENSMUSG00000031893	Tsnaxip1	ENSMUSG00000098004	Gm27027
ENSMUSG00000031898	Dpep3	ENSMUSG00000098090	2700099C18Rik
ENSMUSG00000031913	Vps4a	ENSMUSG00000098104	Gm6085
ENSMUSG00000031922	Cep57	ENSMUSG00000098112	Bin2
ENSMUSG00000031927	1700012B09Rik	ENSMUSG00000098127	Gm4665
ENSMUSG00000031928	Mre11a	ENSMUSG00000098134	Rnf113a2
ENSMUSG00000031930	Wwp2	ENSMUSG00000098198	Gm9169
ENSMUSG00000031939	Taf1d	ENSMUSG00000098234	Snhg6
ENSMUSG00000031954	Cfdp1	ENSMUSG00000098374	Gm28043
ENSMUSG00000031960	Aars	ENSMUSG00000098404	Mrip-ps
ENSMUSG00000031971	Ccsap	ENSMUSG00000098425	Gm24949
ENSMUSG00000031979	Cog2	ENSMUSG00000098530	Gm28051
ENSMUSG00000031984	2810004N23Rik	ENSMUSG00000098641	None
ENSMUSG00000031986	Sprtn	ENSMUSG00000098761	Gm18821
ENSMUSG00000031991	Spata19	ENSMUSG00000098875	Gm27211
ENSMUSG00000031996	Aplp2	ENSMUSG00000098973	Mir6236
ENSMUSG00000032002	Dcun1d5	ENSMUSG00000098985	Gm27219
ENSMUSG00000032006	Pdgfd	ENSMUSG00000099021	Rn7s1
ENSMUSG00000032009	Sesn3	ENSMUSG00000099250	Rn7s2
ENSMUSG00000032010	Usp2	ENSMUSG00000099329	Gm28052
ENSMUSG00000032023	Jhy	ENSMUSG00000099353	1700031M16Rik
ENSMUSG00000032030	Cul5	ENSMUSG00000099418	Gm6657
ENSMUSG00000032050	Rdx	ENSMUSG00000099422	Gm4275
ENSMUSG00000032058	Ppp2r1b	ENSMUSG00000099481	Xndc1
ENSMUSG00000032064	Dixdc1	ENSMUSG00000099492	Gm5525
[truncated: 414 more rows]

## Sheet: Sheet2
ENSMUSG00000000028		ENSMUSG00000000028
ENSMUSG00000000037		ENSMUSG00000000037
ENSMUSG00000000125		ENSMUSG00000000125
ENSMUSG00000000127		ENSMUSG00000000127
ENSMUSG00000000131		ENSMUSG00000000131
ENSMUSG00000000282		ENSMUSG00000000282
ENSMUSG00000000339		ENSMUSG00000000339
ENSMUSG00000000365		ENSMUSG00000000365
ENSMUSG00000000399		ENSMUSG00000000399
ENSMUSG00000000411		ENSMUSG00000000411
ENSMUSG00000000420		ENSMUSG00000000420
ENSMUSG00000000563		ENSMUSG00000000563
ENSMUSG00000000568		ENSMUSG00000000568
ENSMUSG00000000605		ENSMUSG00000000605
ENSMUSG00000000631		ENSMUSG00000000631
ENSMUSG00000000738		ENSMUSG00000000738
ENSMUSG00000000740		ENSMUSG00000000740
ENSMUSG00000000787		ENSMUSG00000000787
ENSMUSG00000000794		ENSMUSG00000000794
ENSMUSG00000000804		ENSMUSG00000000804
ENSMUSG00000000811		ENSMUSG00000000811
ENSMUSG00000000823		ENSMUSG00000000823
ENSMUSG00000000838		ENSMUSG00000000838
ENSMUSG00000000915		ENSMUSG00000000915
ENSMUSG00000001016		ENSMUSG00000001016
ENSMUSG00000001017		ENSMUSG00000001017
ENSMUSG00000001052		ENSMUSG00000001052
ENSMUSG00000001089		ENSMUSG00000001089
ENSMUSG00000001105		ENSMUSG00000001105
ENSMUSG00000001120		ENSMUSG00000001120
ENSMUSG00000001151		ENSMUSG00000001151
ENSMUSG00000001156		ENSMUSG00000001156
ENSMUSG00000001158		ENSMUSG00000001158
ENSMUSG00000001175		ENSMUSG00000001175
ENSMUSG00000001211		ENSMUSG00000001211
ENSMUSG00000001228		ENSMUSG00000001228
ENSMUSG00000001247		ENSMUSG00000001247
ENSMUSG00000001248		ENSMUSG00000001248
ENSMUSG00000001289		ENSMUSG00000001289
ENSMUSG00000001305		ENSMUSG00000001305
ENSMUSG00000001366		ENSMUSG00000001366
ENSMUSG00000001383		ENSMUSG00000001383
ENSMUSG00000001415		ENSMUSG00000001415
ENSMUSG00000001416		ENSMUSG00000001416
ENSMUSG00000001435		ENSMUSG00000001435
ENSMUSG00000001440		ENSMUSG00000001440
ENSMUSG00000001467		ENSMUSG00000001467
ENSMUSG00000001472		ENSMUSG00000001472
ENSMUSG00000001525		ENSMUSG00000001525
ENSMUSG00000001542		ENSMUSG00000001542
ENSMUSG00000001558		ENSMUSG00000001558
ENSMUSG00000001569		ENSMUSG00000001569
ENSMUSG00000001632		ENSMUSG00000001632
ENSMUSG00000001666		ENSMUSG00000001666
ENSMUSG00000001674		ENSMUSG00000001674
ENSMUSG00000001687		ENSMUSG00000001687
ENSMUSG00000001767		ENSMUSG00000001767
ENSMUSG00000001783		ENSMUSG00000001783
ENSMUSG00000001794		ENSMUSG00000001794
ENSMUSG00000001829		ENSMUSG00000001829
ENSMUSG00000001833		ENSMUSG00000001833
ENSMUSG00000001910		ENSMUSG00000001910
ENSMUSG00000001948		ENSMUSG00000001948
ENSMUSG00000002017		ENSMUSG00000002017
ENSMUSG00000002031		ENSMUSG00000002031
ENSMUSG00000002052		ENSMUSG00000002052
ENSMUSG00000002055		ENSMUSG00000002055
ENSMUSG00000002076		ENSMUSG00000002076
ENSMUSG00000002102		ENSMUSG00000002102
ENSMUSG00000002107		ENSMUSG00000002107
ENSMUSG00000002129		ENSMUSG00000002129
ENSMUSG00000002190		ENSMUSG00000002190
ENSMUSG00000002210		ENSMUSG00000002210
ENSMUSG00000002265		ENSMUSG00000002265
ENSMUSG00000002307		ENSMUSG00000002307
ENSMUSG00000002308		ENSMUSG00000002308
ENSMUSG00000002319		ENSMUSG00000002319
ENSMUSG00000002324		ENSMUSG00000002324
ENSMUSG00000002372		ENSMUSG00000002372
ENSMUSG00000002409		ENSMUSG00000002409
ENSMUSG00000002413		ENSMUSG00000002413
ENSMUSG00000002428		ENSMUSG00000002428
ENSMUSG00000002455		ENSMUSG00000002455
ENSMUSG00000002486		ENSMUSG00000002486
ENSMUSG00000002489		ENSMUSG00000002489
ENSMUSG00000002524		ENSMUSG00000002524
ENSMUSG00000002546		ENSMUSG00000002546
ENSMUSG00000002608		ENSMUSG00000002608
ENSMUSG00000002625		ENSMUSG00000002625
ENSMUSG00000002658		ENSMUSG00000002658
ENSMUSG00000002732		ENSMUSG00000002732
ENSMUSG00000002748		ENSMUSG00000002748
ENSMUSG00000002768		ENSMUSG00000002768
ENSMUSG00000002833		ENSMUSG00000002833
ENSMUSG00000002835		ENSMUSG00000002835
ENSMUSG00000002948		ENSMUSG00000002948
ENSMUSG00000002949		ENSMUSG00000002949
ENSMUSG00000002985		ENSMUSG00000002985
ENSMUSG00000002996		ENSMUSG00000002996
ENSMUSG00000003033		ENSMUSG00000003033
ENSMUSG00000003037		ENSMUSG00000003037
ENSMUSG00000003039		ENSMUSG00000003039
ENSMUSG00000003068		ENSMUSG00000003068
ENSMUSG00000003119		ENSMUSG00000003119
ENSMUSG00000003123		ENSMUSG00000003123
ENSMUSG00000003134		ENSMUSG00000003134
ENSMUSG00000003153		ENSMUSG00000003153
ENSMUSG00000003184		ENSMUSG00000003184
ENSMUSG00000003200		ENSMUSG00000003200
ENSMUSG00000003226		ENSMUSG00000003226
ENSMUSG00000003234		ENSMUSG00000003234
ENSMUSG00000003235		ENSMUSG00000003235
ENSMUSG00000003269		ENSMUSG00000003269
ENSMUSG00000003316		ENSMUSG00000003316
ENSMUSG00000003341		ENSMUSG00000003341
ENSMUSG00000003345		ENSMUSG00000003345
ENSMUSG00000003354		ENSMUSG00000003354
ENSMUSG00000003360		ENSMUSG00000003360
ENSMUSG00000003402		ENSMUSG00000003402
ENSMUSG00000003421		ENSMUSG00000003421
ENSMUSG00000003423		ENSMUSG00000003423
ENSMUSG00000003429		ENSMUSG00000003429
ENSMUSG00000003435		ENSMUSG00000003435
ENSMUSG00000003437		ENSMUSG00000003437
ENSMUSG00000003527		ENSMUSG00000003527
ENSMUSG00000003531		ENSMUSG00000003531
ENSMUSG00000003604		ENSMUSG00000003604
ENSMUSG00000003660		ENSMUSG00000003660
ENSMUSG00000003731		ENSMUSG00000003731
ENSMUSG00000003778		ENSMUSG00000003778
ENSMUSG00000003779		ENSMUSG00000003779
ENSMUSG00000003810		ENSMUSG00000003810
ENSMUSG00000003814		ENSMUSG00000003814
ENSMUSG00000003824		ENSMUSG00000003824
ENSMUSG00000003847		ENSMUSG00000003847
ENSMUSG00000003923		ENSMUSG00000003923
ENSMUSG00000003970		ENSMUSG00000003970
ENSMUSG00000004032		ENSMUSG00000004032
ENSMUSG00000004040		ENSMUSG00000004040
ENSMUSG00000004070		ENSMUSG00000004070
ENSMUSG00000004096		ENSMUSG00000004096
ENSMUSG00000004099		ENSMUSG00000004099
ENSMUSG00000004127		ENSMUSG00000004127
ENSMUSG00000004207		ENSMUSG00000004207
ENSMUSG00000004347		ENSMUSG00000004347
ENSMUSG00000004364		ENSMUSG00000004364
ENSMUSG00000004455		ENSMUSG00000004455
ENSMUSG00000004460		ENSMUSG00000004460
ENSMUSG00000004508		ENSMUSG00000004508
ENSMUSG00000004535		ENSMUSG00000004535
ENSMUSG00000004591		ENSMUSG00000004591
ENSMUSG00000004610		ENSMUSG00000004610
ENSMUSG00000004637		ENSMUSG00000004637
ENSMUSG00000004642		ENSMUSG00000004642
ENSMUSG00000004667		ENSMUSG00000004667
ENSMUSG00000004771		ENSMUSG00000004771
ENSMUSG00000004798		ENSMUSG00000004798
ENSMUSG00000004843		ENSMUSG00000004843
ENSMUSG00000004865		ENSMUSG00000004865
ENSMUSG00000004895		ENSMUSG00000004895
ENSMUSG00000004897		ENSMUSG00000004897
ENSMUSG00000004929		ENSMUSG00000004929
ENSMUSG00000004980		ENSMUSG00000004980
ENSMUSG00000005045		ENSMUSG00000005045
ENSMUSG00000005102		ENSMUSG00000005102
ENSMUSG00000005103		ENSMUSG00000005103
ENSMUSG00000005131		ENSMUSG00000005131
ENSMUSG00000005198		ENSMUSG00000005198
ENSMUSG00000005237		ENSMUSG00000005237
ENSMUSG00000005299		ENSMUSG00000005299
ENSMUSG00000005362		ENSMUSG00000005362
ENSMUSG00000005370		ENSMUSG00000005370
ENSMUSG00000005371		ENSMUSG00000005371
ENSMUSG00000005374		ENSMUSG00000005374
ENSMUSG00000005417		ENSMUSG00000005417
ENSMUSG00000005474		ENSMUSG00000005474
ENSMUSG00000005481		ENSMUSG00000005481
ENSMUSG00000005483		ENSMUSG00000005483
ENSMUSG00000005566		ENSMUSG00000005566
ENSMUSG00000005575		ENSMUSG00000005575
ENSMUSG00000005609		ENSMUSG00000005609
ENSMUSG00000005610		ENSMUSG00000005610
ENSMUSG00000005615		ENSMUSG00000005615
ENSMUSG00000005625		ENSMUSG00000005625
ENSMUSG00000005687		ENSMUSG00000005687
ENSMUSG00000005698		ENSMUSG00000005698
ENSMUSG00000005732		ENSMUSG00000005732
ENSMUSG00000005803		ENSMUSG00000005803
ENSMUSG00000005823		ENSMUSG00000005823
ENSMUSG00000005881		ENSMUSG00000005881
ENSMUSG00000005882		ENSMUSG00000005882
ENSMUSG00000005886		ENSMUSG00000005886
ENSMUSG00000005936		ENSMUSG00000005936
ENSMUSG00000005981		ENSMUSG00000005981
ENSMUSG00000005983		ENSMUSG00000005983
ENSMUSG00000006005		ENSMUSG00000006005
ENSMUSG00000006024		ENSMUSG00000006024
ENSMUSG00000006058		ENSMUSG00000006058
ENSMUSG00000006169		ENSMUSG00000006169
ENSMUSG00000006191		ENSMUSG00000006191
ENSMUSG00000006215		ENSMUSG00000006215
ENSMUSG00000006276		ENSMUSG00000006276
ENSMUSG00000006299		ENSMUSG00000006299
ENSMUSG00000006307		ENSMUSG00000006307
ENSMUSG00000006310		ENSMUSG00000006310
ENSMUSG00000006333		ENSMUSG00000006333
ENSMUSG00000006335		ENSMUSG00000006335
ENSMUSG00000006527		ENSMUSG00000006527
ENSMUSG00000006576		ENSMUSG00000006576
ENSMUSG00000006599		ENSMUSG00000006599
ENSMUSG00000006676		ENSMUSG00000006676
ENSMUSG00000006715		ENSMUSG00000006715
ENSMUSG00000006740		ENSMUSG00000006740
ENSMUSG00000006784		ENSMUSG00000006784
ENSMUSG00000006906		ENSMUSG00000006906
ENSMUSG00000006930		ENSMUSG00000006930
ENSMUSG00000006932		ENSMUSG00000006932
ENSMUSG00000006941		ENSMUSG00000006941
ENSMUSG00000006998		ENSMUSG00000006998
ENSMUSG00000007029		ENSMUSG00000007029
ENSMUSG00000007033		ENSMUSG00000007033
ENSMUSG00000007035		ENSMUSG00000007035
ENSMUSG00000007080		ENSMUSG00000007080
ENSMUSG00000007097		ENSMUSG00000007097
ENSMUSG00000007107		ENSMUSG00000007107
ENSMUSG00000007122		ENSMUSG00000007122
ENSMUSG00000007440		ENSMUSG00000007440
ENSMUSG00000007656		ENSMUSG00000007656
ENSMUSG00000007721		ENSMUSG00000007721
ENSMUSG00000007739		ENSMUSG00000007739
ENSMUSG00000007827		ENSMUSG00000007827
ENSMUSG00000007836		ENSMUSG00000007836
ENSMUSG00000007850		ENSMUSG00000007850
ENSMUSG00000007867		ENSMUSG00000007867
ENSMUSG00000007907		ENSMUSG00000007907
ENSMUSG00000008028		ENSMUSG00000008028
ENSMUSG00000008200		ENSMUSG00000008200
ENSMUSG00000008301		ENSMUSG00000008301
ENSMUSG00000008307		ENSMUSG00000008307
ENSMUSG00000008333		ENSMUSG00000008333
ENSMUSG00000008348		ENSMUSG00000008348
ENSMUSG00000008373		ENSMUSG00000008373
ENSMUSG00000008429		ENSMUSG00000008429
ENSMUSG00000008575		ENSMUSG00000008575
ENSMUSG00000008683		ENSMUSG00000008683
ENSMUSG00000008690		ENSMUSG00000008690
ENSMUSG00000008730		ENSMUSG00000008730
ENSMUSG00000008763		ENSMUSG00000008763
ENSMUSG00000008822		ENSMUSG00000008822
ENSMUSG00000008859		ENSMUSG00000008859
ENSMUSG00000008958		ENSMUSG00000008958
ENSMUSG00000008976		ENSMUSG00000008976
ENSMUSG00000009013		ENSMUSG00000009013
ENSMUSG00000009030		ENSMUSG00000009030
ENSMUSG00000009073		ENSMUSG00000009073
ENSMUSG00000009079		ENSMUSG00000009079
ENSMUSG00000009093		ENSMUSG00000009093
ENSMUSG00000009470		ENSMUSG00000009470
ENSMUSG00000009549		ENSMUSG00000009549
ENSMUSG00000009575		ENSMUSG00000009575
ENSMUSG00000009596		ENSMUSG00000009596
ENSMUSG00000009628		ENSMUSG00000009628
ENSMUSG00000009630		ENSMUSG00000009630
ENSMUSG00000009670		ENSMUSG00000009670
ENSMUSG00000009734		ENSMUSG00000009734
ENSMUSG00000009741		ENSMUSG00000009741
ENSMUSG00000009907		ENSMUSG00000009907
ENSMUSG00000009927		ENSMUSG00000009927
ENSMUSG00000009941		ENSMUSG00000009941
ENSMUSG00000010044		ENSMUSG00000010044
ENSMUSG00000010095		ENSMUSG00000010095
ENSMUSG00000010097		ENSMUSG00000010097
ENSMUSG00000010136		ENSMUSG00000010136
ENSMUSG00000010277		ENSMUSG00000010277
ENSMUSG00000010342		ENSMUSG00000010342
ENSMUSG00000010362		ENSMUSG00000010362
ENSMUSG00000010376		ENSMUSG00000010376
ENSMUSG00000010392		ENSMUSG00000010392
ENSMUSG00000010406		ENSMUSG00000010406
ENSMUSG00000010435		ENSMUSG00000010435
ENSMUSG00000010453		ENSMUSG00000010453
ENSMUSG00000010505		ENSMUSG00000010505
ENSMUSG00000010608		ENSMUSG00000010608
ENSMUSG00000010755		ENSMUSG00000010755
ENSMUSG00000010796		ENSMUSG00000010796
ENSMUSG00000011154		ENSMUSG00000011154
ENSMUSG00000011158		ENSMUSG00000011158
ENSMUSG00000011306		ENSMUSG00000011306
ENSMUSG00000011349		ENSMUSG00000011349
ENSMUSG00000011350		ENSMUSG00000011350
ENSMUSG00000011751		ENSMUSG00000011751
ENSMUSG00000011831		ENSMUSG00000011831
ENSMUSG00000011832		ENSMUSG00000011832
ENSMUSG00000011877		ENSMUSG00000011877
ENSMUSG00000011958		ENSMUSG00000011958
ENSMUSG00000012076		ENSMUSG00000012076
ENSMUSG00000012126		ENSMUSG00000012126
ENSMUSG00000012211		ENSMUSG00000012211
ENSMUSG00000012296		ENSMUSG00000012296
ENSMUSG00000012443		ENSMUSG00000012443
ENSMUSG00000012609		ENSMUSG00000012609
ENSMUSG00000013076		ENSMUSG00000013076
ENSMUSG00000013091		ENSMUSG00000013091
ENSMUSG00000013155		ENSMUSG00000013155
ENSMUSG00000013236		ENSMUSG00000013236
ENSMUSG00000013663		ENSMUSG00000013663
ENSMUSG00000013787		ENSMUSG00000013787
ENSMUSG00000014074		ENSMUSG00000014074
ENSMUSG00000014077		ENSMUSG00000014077
ENSMUSG00000014195		ENSMUSG00000014195
ENSMUSG00000014226		ENSMUSG00000014226
ENSMUSG00000014232		ENSMUSG00000014232
ENSMUSG00000014426		ENSMUSG00000014426
ENSMUSG00000014504		ENSMUSG00000014504
ENSMUSG00000014551		ENSMUSG00000014551
ENSMUSG00000014668		ENSMUSG00000014668
ENSMUSG00000014782		ENSMUSG00000014782
ENSMUSG00000014850		ENSMUSG00000014850
ENSMUSG00000014905		ENSMUSG00000014905
ENSMUSG00000014956		ENSMUSG00000014956
ENSMUSG00000015002		ENSMUSG00000015002
ENSMUSG00000015087		ENSMUSG00000015087
ENSMUSG00000015090		ENSMUSG00000015090
ENSMUSG00000015092		ENSMUSG00000015092
ENSMUSG00000015095		ENSMUSG00000015095
ENSMUSG00000015120		ENSMUSG00000015120
ENSMUSG00000015149		ENSMUSG00000015149
ENSMUSG00000015165		ENSMUSG00000015165
ENSMUSG00000015176		ENSMUSG00000015176
ENSMUSG00000015217		ENSMUSG00000015217
ENSMUSG00000015222		ENSMUSG00000015222
ENSMUSG00000015243		ENSMUSG00000015243
ENSMUSG00000015305		ENSMUSG00000015305
ENSMUSG00000015357		ENSMUSG00000015357
ENSMUSG00000015365		ENSMUSG00000015365
ENSMUSG00000015597		ENSMUSG00000015597
ENSMUSG00000015599		ENSMUSG00000015599
ENSMUSG00000015656		ENSMUSG00000015656
ENSMUSG00000015672		ENSMUSG00000015672
ENSMUSG00000015697		ENSMUSG00000015697
ENSMUSG00000015733		ENSMUSG00000015733
ENSMUSG00000015748		ENSMUSG00000015748
ENSMUSG00000015749		ENSMUSG00000015749
ENSMUSG00000015757		ENSMUSG00000015757
ENSMUSG00000015804		ENSMUSG00000015804
ENSMUSG00000015837		ENSMUSG00000015837
ENSMUSG00000015880		ENSMUSG00000015880
ENSMUSG00000015882		ENSMUSG00000015882
ENSMUSG00000015937		ENSMUSG00000015937
ENSMUSG00000015942		ENSMUSG00000015942
ENSMUSG00000015961		ENSMUSG00000015961
ENSMUSG00000015962		ENSMUSG00000015962
ENSMUSG00000015971		ENSMUSG00000015971
ENSMUSG00000015980		ENSMUSG00000015980
ENSMUSG00000016018		ENSMUSG00000016018
ENSMUSG00000016239		ENSMUSG00000016239
ENSMUSG00000016458		ENSMUSG00000016458
ENSMUSG00000016487		ENSMUSG00000016487
ENSMUSG00000016526		ENSMUSG00000016526
ENSMUSG00000016554		ENSMUSG00000016554
ENSMUSG00000016619		ENSMUSG00000016619
ENSMUSG00000016626		ENSMUSG00000016626
ENSMUSG00000016664		ENSMUSG00000016664
ENSMUSG00000016921		ENSMUSG00000016921
ENSMUSG00000016982		ENSMUSG00000016982
ENSMUSG00000017049		ENSMUSG00000017049
ENSMUSG00000017119		ENSMUSG00000017119
ENSMUSG00000017132		ENSMUSG00000017132
ENSMUSG00000017146		ENSMUSG00000017146
ENSMUSG00000017264		ENSMUSG00000017264
ENSMUSG00000017291		ENSMUSG00000017291
ENSMUSG00000017299		ENSMUSG00000017299
ENSMUSG00000017376		ENSMUSG00000017376
ENSMUSG00000017404		ENSMUSG00000017404
ENSMUSG00000017466		ENSMUSG00000017466
ENSMUSG00000017478		ENSMUSG00000017478
ENSMUSG00000017485		ENSMUSG00000017485
ENSMUSG00000017548		ENSMUSG00000017548
ENSMUSG00000017639		ENSMUSG00000017639
ENSMUSG00000017707		ENSMUSG00000017707
ENSMUSG00000017720		ENSMUSG00000017720
ENSMUSG00000017781		ENSMUSG00000017781
ENSMUSG00000017831		ENSMUSG00000017831
ENSMUSG00000017837		ENSMUSG00000017837
ENSMUSG00000017843		ENSMUSG00000017843
ENSMUSG00000017861		ENSMUSG00000017861
ENSMUSG00000017978		ENSMUSG00000017978
ENSMUSG00000017999		ENSMUSG00000017999
ENSMUSG00000018001		ENSMUSG00000018001
ENSMUSG00000018040		ENSMUSG00000018040
ENSMUSG00000018171		ENSMUSG00000018171
ENSMUSG00000018189		ENSMUSG00000018189
ENSMUSG00000018196		ENSMUSG00000018196
ENSMUSG00000018209		ENSMUSG00000018209
ENSMUSG00000018287		ENSMUSG00000018287
ENSMUSG00000018322		ENSMUSG00000018322
ENSMUSG00000018326		ENSMUSG00000018326
ENSMUSG00000018372		ENSMUSG00000018372
ENSMUSG00000018379		ENSMUSG00000018379
ENSMUSG00000018395		ENSMUSG00000018395
ENSMUSG00000018412		ENSMUSG00000018412
ENSMUSG00000018415		ENSMUSG00000018415
ENSMUSG00000018425		ENSMUSG00000018425
ENSMUSG00000018428		ENSMUSG00000018428
ENSMUSG00000018474		ENSMUSG00000018474
ENSMUSG00000018481		ENSMUSG00000018481
ENSMUSG00000018501		ENSMUSG00000018501
ENSMUSG00000018509		ENSMUSG00000018509
ENSMUSG00000018541		ENSMUSG00000018541
ENSMUSG00000018548		ENSMUSG00000018548
ENSMUSG00000018554		ENSMUSG00000018554
ENSMUSG00000018567		ENSMUSG00000018567
ENSMUSG00000018570		ENSMUSG00000018570
ENSMUSG00000018572		ENSMUSG00000018572
ENSMUSG00000018593		ENSMUSG00000018593
ENSMUSG00000018651		ENSMUSG00000018651
ENSMUSG00000018666		ENSMUSG00000018666
ENSMUSG00000018669		ENSMUSG00000018669
ENSMUSG00000018677		ENSMUSG00000018677
ENSMUSG00000018697		ENSMUSG00000018697
ENSMUSG00000018707		ENSMUSG00000018707
ENSMUSG00000018736		ENSMUSG00000018736
ENSMUSG00000018765		ENSMUSG00000018765
ENSMUSG00000018796		ENSMUSG00000018796
ENSMUSG00000018830		ENSMUSG00000018830
ENSMUSG00000018844		ENSMUSG00000018844
ENSMUSG00000018846		ENSMUSG00000018846
ENSMUSG00000018848		ENSMUSG00000018848
ENSMUSG00000018921		ENSMUSG00000018921
ENSMUSG00000018974		ENSMUSG00000018974
ENSMUSG00000019027		ENSMUSG00000019027
ENSMUSG00000019132		ENSMUSG00000019132
ENSMUSG00000019139		ENSMUSG00000019139
ENSMUSG00000019254		ENSMUSG00000019254
ENSMUSG00000019278		ENSMUSG00000019278
ENSMUSG00000019303		ENSMUSG00000019303
ENSMUSG00000019370		ENSMUSG00000019370
ENSMUSG00000019428		ENSMUSG00000019428
ENSMUSG00000019432		ENSMUSG00000019432
ENSMUSG00000019467		ENSMUSG00000019467
ENSMUSG00000019471		ENSMUSG00000019471
ENSMUSG00000019494		ENSMUSG00000019494
ENSMUSG00000019505		ENSMUSG00000019505
ENSMUSG00000019564		ENSMUSG00000019564
ENSMUSG00000019578		ENSMUSG00000019578
ENSMUSG00000019659		ENSMUSG00000019659
ENSMUSG00000019689		ENSMUSG00000019689
ENSMUSG00000019699		ENSMUSG00000019699
ENSMUSG00000019710		ENSMUSG00000019710
ENSMUSG00000019715		ENSMUSG00000019715
ENSMUSG00000019732		ENSMUSG00000019732
ENSMUSG00000019738		ENSMUSG00000019738
ENSMUSG00000019777		ENSMUSG00000019777
ENSMUSG00000019782		ENSMUSG00000019782
ENSMUSG00000019795		ENSMUSG00000019795
ENSMUSG00000019802		ENSMUSG00000019802
ENSMUSG00000019813		ENSMUSG00000019813
ENSMUSG00000019814		ENSMUSG00000019814
ENSMUSG00000019818		ENSMUSG00000019818
ENSMUSG00000019820		ENSMUSG00000019820
ENSMUSG00000019837		ENSMUSG00000019837
ENSMUSG00000019841		ENSMUSG00000019841
ENSMUSG00000019843		ENSMUSG00000019843
ENSMUSG00000019856		ENSMUSG00000019856
ENSMUSG00000019861		ENSMUSG00000019861
ENSMUSG00000019876		ENSMUSG00000019876
ENSMUSG00000019892		ENSMUSG00000019892
ENSMUSG00000019906		ENSMUSG00000019906
ENSMUSG00000019907		ENSMUSG00000019907
ENSMUSG00000019917		ENSMUSG00000019917
ENSMUSG00000019923		ENSMUSG00000019923
ENSMUSG00000019933		ENSMUSG00000019933
ENSMUSG00000019943		ENSMUSG00000019943
ENSMUSG00000019945		ENSMUSG00000019945
ENSMUSG00000019966		ENSMUSG00000019966
ENSMUSG00000019969		ENSMUSG00000019969
ENSMUSG00000019971		ENSMUSG00000019971
ENSMUSG00000019977		ENSMUSG00000019977
ENSMUSG00000019978		ENSMUSG00000019978
ENSMUSG00000019986		ENSMUSG00000019986
ENSMUSG00000019996		ENSMUSG00000019996
ENSMUSG00000020015		ENSMUSG00000020015
ENSMUSG00000020020		ENSMUSG00000020020
ENSMUSG00000020022		ENSMUSG00000020022
ENSMUSG00000020024		ENSMUSG00000020024
ENSMUSG00000020029		ENSMUSG00000020029
ENSMUSG00000020037		ENSMUSG00000020037
ENSMUSG00000020048		ENSMUSG00000020048
ENSMUSG00000020059		ENSMUSG00000020059
ENSMUSG00000020064		ENSMUSG00000020064
ENSMUSG00000020069		ENSMUSG00000020069
ENSMUSG00000020074		ENSMUSG00000020074
ENSMUSG00000020075		ENSMUSG00000020075
ENSMUSG00000020076		ENSMUSG00000020076
ENSMUSG00000020088		ENSMUSG00000020088
ENSMUSG00000020102		ENSMUSG00000020102
ENSMUSG00000020114		ENSMUSG00000020114
ENSMUSG00000020115		ENSMUSG00000020115
ENSMUSG00000020116		ENSMUSG00000020116
ENSMUSG00000020124		ENSMUSG00000020124
ENSMUSG00000020130		ENSMUSG00000020130
ENSMUSG00000020131		ENSMUSG00000020131
ENSMUSG00000020156		ENSMUSG00000020156
ENSMUSG00000020164		ENSMUSG00000020164
ENSMUSG00000020184		ENSMUSG00000020184
ENSMUSG00000020189		ENSMUSG00000020189
ENSMUSG00000020191		ENSMUSG00000020191
ENSMUSG00000020193		ENSMUSG00000020193
ENSMUSG00000020196		ENSMUSG00000020196
ENSMUSG00000020198		ENSMUSG00000020198
ENSMUSG00000020212		ENSMUSG00000020212
ENSMUSG00000020214		ENSMUSG00000020214
ENSMUSG00000020224		ENSMUSG00000020224
ENSMUSG00000020248		ENSMUSG00000020248
ENSMUSG00000020250		ENSMUSG00000020250
ENSMUSG00000020260		ENSMUSG00000020260
ENSMUSG00000020263		ENSMUSG00000020263
ENSMUSG00000020270		ENSMUSG00000020270
ENSMUSG00000020272		ENSMUSG00000020272
ENSMUSG00000020283		ENSMUSG00000020283
ENSMUSG00000020286		ENSMUSG00000020286
ENSMUSG00000020290		ENSMUSG00000020290
ENSMUSG00000020307		ENSMUSG00000020307
ENSMUSG00000020311		ENSMUSG00000020311
ENSMUSG00000020315		ENSMUSG00000020315
ENSMUSG00000020317		ENSMUSG00000020317
ENSMUSG00000020319		ENSMUSG00000020319
ENSMUSG00000020321		ENSMUSG00000020321
ENSMUSG00000020328		ENSMUSG00000020328
ENSMUSG00000020330		ENSMUSG00000020330
ENSMUSG00000020332		ENSMUSG00000020332
ENSMUSG00000020333		ENSMUSG00000020333
ENSMUSG00000020349		ENSMUSG00000020349
ENSMUSG00000020358		ENSMUSG00000020358
ENSMUSG00000020361		ENSMUSG00000020361
ENSMUSG00000020368		ENSMUSG00000020368
ENSMUSG00000020380		ENSMUSG00000020380
ENSMUSG00000020385		ENSMUSG00000020385
ENSMUSG00000020389		ENSMUSG00000020389
ENSMUSG00000020401		ENSMUSG00000020401
ENSMUSG00000020409		ENSMUSG00000020409
ENSMUSG00000020412		ENSMUSG00000020412
ENSMUSG00000020430		ENSMUSG00000020430
ENSMUSG00000020434		ENSMUSG00000020434
ENSMUSG00000020435		ENSMUSG00000020435
ENSMUSG00000020441		ENSMUSG00000020441
ENSMUSG00000020454		ENSMUSG00000020454
ENSMUSG00000020456		ENSMUSG00000020456
ENSMUSG00000020462		ENSMUSG00000020462
ENSMUSG00000020463		ENSMUSG00000020463
ENSMUSG00000020472		ENSMUSG00000020472
ENSMUSG00000020475		ENSMUSG00000020475
ENSMUSG00000020476		ENSMUSG00000020476
ENSMUSG00000020481		ENSMUSG00000020481
ENSMUSG00000020483		ENSMUSG00000020483
ENSMUSG00000020486		ENSMUSG00000020486
ENSMUSG00000020491		ENSMUSG00000020491
ENSMUSG00000020496		ENSMUSG00000020496
ENSMUSG00000020515		ENSMUSG00000020515
ENSMUSG00000020516		ENSMUSG00000020516
ENSMUSG00000020520		ENSMUSG00000020520
ENSMUSG00000020525		ENSMUSG00000020525
ENSMUSG00000020530		ENSMUSG00000020530
ENSMUSG00000020532		ENSMUSG00000020532
ENSMUSG00000020562		ENSMUSG00000020562
ENSMUSG00000020571		ENSMUSG00000020571
ENSMUSG00000020580		ENSMUSG00000020580
ENSMUSG00000020593		ENSMUSG00000020593
ENSMUSG00000020594		ENSMUSG00000020594
ENSMUSG00000020608		ENSMUSG00000020608
ENSMUSG00000020610		ENSMUSG00000020610
ENSMUSG00000020612		ENSMUSG00000020612
ENSMUSG00000020617		ENSMUSG00000020617
ENSMUSG00000020622		ENSMUSG00000020622
ENSMUSG00000020636		ENSMUSG00000020636
ENSMUSG00000020639		ENSMUSG00000020639
ENSMUSG00000020640		ENSMUSG00000020640
ENSMUSG00000020652		ENSMUSG00000020652
ENSMUSG00000020654		ENSMUSG00000020654
ENSMUSG00000020657		ENSMUSG00000020657
ENSMUSG00000020671		ENSMUSG00000020671
ENSMUSG00000020677		ENSMUSG00000020677
ENSMUSG00000020680		ENSMUSG00000020680
ENSMUSG00000020681		ENSMUSG00000020681
ENSMUSG00000020687		ENSMUSG00000020687
ENSMUSG00000020690		ENSMUSG00000020690
ENSMUSG00000020694		ENSMUSG00000020694
ENSMUSG00000020697		ENSMUSG00000020697
ENSMUSG00000020705		ENSMUSG00000020705
ENSMUSG00000020706		ENSMUSG00000020706
ENSMUSG00000020708		ENSMUSG00000020708
ENSMUSG00000020719		ENSMUSG00000020719
ENSMUSG00000020720		ENSMUSG00000020720
ENSMUSG00000020721		ENSMUSG00000020721
ENSMUSG00000020728		ENSMUSG00000020728
ENSMUSG00000020737		ENSMUSG00000020737
ENSMUSG00000020743		ENSMUSG00000020743
ENSMUSG00000020745		ENSMUSG00000020745
ENSMUSG00000020755		ENSMUSG00000020755
ENSMUSG00000020775		ENSMUSG00000020775
ENSMUSG00000020776		ENSMUSG00000020776
ENSMUSG00000020783		ENSMUSG00000020783
ENSMUSG00000020792		ENSMUSG00000020792
ENSMUSG00000020799		ENSMUSG00000020799
ENSMUSG00000020802		ENSMUSG00000020802
ENSMUSG00000020807		ENSMUSG00000020807
ENSMUSG00000020814		ENSMUSG00000020814
ENSMUSG00000020817		ENSMUSG00000020817
ENSMUSG00000020823		ENSMUSG00000020823
ENSMUSG00000020827		ENSMUSG00000020827
ENSMUSG00000020844		ENSMUSG00000020844
ENSMUSG00000020849		ENSMUSG00000020849
ENSMUSG00000020850		ENSMUSG00000020850
ENSMUSG00000020859		ENSMUSG00000020859
ENSMUSG00000020863		ENSMUSG00000020863
ENSMUSG00000020867		ENSMUSG00000020867
ENSMUSG00000020869		ENSMUSG00000020869
ENSMUSG00000020870		ENSMUSG00000020870
ENSMUSG00000020878		ENSMUSG00000020878
ENSMUSG00000020882		ENSMUSG00000020882
ENSMUSG00000020893		ENSMUSG00000020893
ENSMUSG00000020900		ENSMUSG00000020900
ENSMUSG00000020903		ENSMUSG00000020903
ENSMUSG00000020904		ENSMUSG00000020904
ENSMUSG00000020914		ENSMUSG00000020914
ENSMUSG00000020923		ENSMUSG00000020923
ENSMUSG00000020925		ENSMUSG00000020925
ENSMUSG00000020929		ENSMUSG00000020929
ENSMUSG00000020936		ENSMUSG00000020936
ENSMUSG00000020945		ENSMUSG00000020945
ENSMUSG00000020954		ENSMUSG00000020954
ENSMUSG00000020962		ENSMUSG00000020962
ENSMUSG00000020964		ENSMUSG00000020964
ENSMUSG00000020978		ENSMUSG00000020978
ENSMUSG00000020982		ENSMUSG00000020982
ENSMUSG00000020986		ENSMUSG00000020986
ENSMUSG00000020993		ENSMUSG00000020993
ENSMUSG00000020994		ENSMUSG00000020994
ENSMUSG00000021003		ENSMUSG00000021003
ENSMUSG00000021007		ENSMUSG00000021007
ENSMUSG00000021012		ENSMUSG00000021012
ENSMUSG00000021022		ENSMUSG00000021022
ENSMUSG00000021027		ENSMUSG00000021027
ENSMUSG00000021036		ENSMUSG00000021036
ENSMUSG00000021037		ENSMUSG00000021037
ENSMUSG00000021039		ENSMUSG00000021039
ENSMUSG00000021051		ENSMUSG00000021051
ENSMUSG00000021056		ENSMUSG00000021056
ENSMUSG00000021061		ENSMUSG00000021061
ENSMUSG00000021065		ENSMUSG00000021065
ENSMUSG00000021066		ENSMUSG00000021066
ENSMUSG00000021067		ENSMUSG00000021067
ENSMUSG00000021078		ENSMUSG00000021078
ENSMUSG00000021086		ENSMUSG00000021086
ENSMUSG00000021090		ENSMUSG00000021090
ENSMUSG00000021096		ENSMUSG00000021096
ENSMUSG00000021097		ENSMUSG00000021097
ENSMUSG00000021109		ENSMUSG00000021109
ENSMUSG00000021111		ENSMUSG00000021111
ENSMUSG00000021112		ENSMUSG00000021112
ENSMUSG00000021113		ENSMUSG00000021113
ENSMUSG00000021114		ENSMUSG00000021114
ENSMUSG00000021115		ENSMUSG00000021115
ENSMUSG00000021116		ENSMUSG00000021116
ENSMUSG00000021124		ENSMUSG00000021124
ENSMUSG00000021134		ENSMUSG00000021134
ENSMUSG00000021139		ENSMUSG00000021139
ENSMUSG00000021140		ENSMUSG00000021140
ENSMUSG00000021143		ENSMUSG00000021143
ENSMUSG00000021149		ENSMUSG00000021149
ENSMUSG00000021156		ENSMUSG00000021156
ENSMUSG00000021178		ENSMUSG00000021178
ENSMUSG00000021179		ENSMUSG00000021179
ENSMUSG00000021182		ENSMUSG00000021182
ENSMUSG00000021188		ENSMUSG00000021188
ENSMUSG00000021189		ENSMUSG00000021189
ENSMUSG00000021192		ENSMUSG00000021192
ENSMUSG00000021194		ENSMUSG00000021194
ENSMUSG00000021196		ENSMUSG00000021196
ENSMUSG00000021203		ENSMUSG00000021203
ENSMUSG00000021218		ENSMUSG00000021218
ENSMUSG00000021221		ENSMUSG00000021221
ENSMUSG00000021234		ENSMUSG00000021234
ENSMUSG00000021244		ENSMUSG00000021244
ENSMUSG00000021248		ENSMUSG00000021248
ENSMUSG00000021258		ENSMUSG00000021258
ENSMUSG00000021262		ENSMUSG00000021262
ENSMUSG00000021264		ENSMUSG00000021264
ENSMUSG00000021268		ENSMUSG00000021268
ENSMUSG00000021270		ENSMUSG00000021270
ENSMUSG00000021273		ENSMUSG00000021273
ENSMUSG00000021279		ENSMUSG00000021279
ENSMUSG00000021281		ENSMUSG00000021281
ENSMUSG00000021282		ENSMUSG00000021282
ENSMUSG00000021288		ENSMUSG00000021288
ENSMUSG00000021301		ENSMUSG00000021301
ENSMUSG00000021311		ENSMUSG00000021311
ENSMUSG00000021338		ENSMUSG00000021338
ENSMUSG00000021339		ENSMUSG00000021339
ENSMUSG00000021363		ENSMUSG00000021363
ENSMUSG00000021366		ENSMUSG00000021366
ENSMUSG00000021374		ENSMUSG00000021374
ENSMUSG00000021377		ENSMUSG00000021377
ENSMUSG00000021379		ENSMUSG00000021379
ENSMUSG00000021384		ENSMUSG00000021384
ENSMUSG00000021392		ENSMUSG00000021392
ENSMUSG00000021413		ENSMUSG00000021413
ENSMUSG00000021414		ENSMUSG00000021414
ENSMUSG00000021415		ENSMUSG00000021415
ENSMUSG00000021420		ENSMUSG00000021420
ENSMUSG00000021427		ENSMUSG00000021427
ENSMUSG00000021428		ENSMUSG00000021428
ENSMUSG00000021431		ENSMUSG00000021431
ENSMUSG00000021476		ENSMUSG00000021476
ENSMUSG00000021477		ENSMUSG00000021477
ENSMUSG00000021488		ENSMUSG00000021488
ENSMUSG00000021494		ENSMUSG00000021494
ENSMUSG00000021499		ENSMUSG00000021499
ENSMUSG00000021500		ENSMUSG00000021500
ENSMUSG00000021501		ENSMUSG00000021501
ENSMUSG00000021534		ENSMUSG00000021534
ENSMUSG00000021537		ENSMUSG00000021537
ENSMUSG00000021546		ENSMUSG00000021546
ENSMUSG00000021549		ENSMUSG00000021549
ENSMUSG00000021552		ENSMUSG00000021552
ENSMUSG00000021557		ENSMUSG00000021557
ENSMUSG00000021577		ENSMUSG00000021577
ENSMUSG00000021585		ENSMUSG00000021585
ENSMUSG00000021595		ENSMUSG00000021595
ENSMUSG00000021596		ENSMUSG00000021596
ENSMUSG00000021598		ENSMUSG00000021598
ENSMUSG00000021615		ENSMUSG00000021615
ENSMUSG00000021619		ENSMUSG00000021619
ENSMUSG00000021635		ENSMUSG00000021635
ENSMUSG00000021639		ENSMUSG00000021639
ENSMUSG00000021643		ENSMUSG00000021643
ENSMUSG00000021668		ENSMUSG00000021668
ENSMUSG00000021669		ENSMUSG00000021669
ENSMUSG00000021670		ENSMUSG00000021670
ENSMUSG00000021671		ENSMUSG00000021671
ENSMUSG00000021676		ENSMUSG00000021676
ENSMUSG00000021681		ENSMUSG00000021681
ENSMUSG00000021686		ENSMUSG00000021686
ENSMUSG00000021690		ENSMUSG00000021690
ENSMUSG00000021693		ENSMUSG00000021693
ENSMUSG00000021699		ENSMUSG00000021699
ENSMUSG00000021709		ENSMUSG00000021709
ENSMUSG00000021712		ENSMUSG00000021712
ENSMUSG00000021713		ENSMUSG00000021713
ENSMUSG00000021715		ENSMUSG00000021715
ENSMUSG00000021716		ENSMUSG00000021716
ENSMUSG00000021733		ENSMUSG00000021733
ENSMUSG00000021737		ENSMUSG00000021737
ENSMUSG00000021741		ENSMUSG00000021741
ENSMUSG00000021748		ENSMUSG00000021748
ENSMUSG00000021754		ENSMUSG00000021754
ENSMUSG00000021758		ENSMUSG00000021758
ENSMUSG00000021767		ENSMUSG00000021767
ENSMUSG00000021771		ENSMUSG00000021771
ENSMUSG00000021775		ENSMUSG00000021775
ENSMUSG00000021790		ENSMUSG00000021790
ENSMUSG00000021791		ENSMUSG00000021791
ENSMUSG00000021807		ENSMUSG00000021807
ENSMUSG00000021811		ENSMUSG00000021811
ENSMUSG00000021819		ENSMUSG00000021819
ENSMUSG00000021823		ENSMUSG00000021823
ENSMUSG00000021832		ENSMUSG00000021832
ENSMUSG00000021838		ENSMUSG00000021838
ENSMUSG00000021843		ENSMUSG00000021843
ENSMUSG00000021846		ENSMUSG00000021846
ENSMUSG00000021850		ENSMUSG00000021850
ENSMUSG00000021870		ENSMUSG00000021870
ENSMUSG00000021879		ENSMUSG00000021879
ENSMUSG00000021891		ENSMUSG00000021891
ENSMUSG00000021892		ENSMUSG00000021892
ENSMUSG00000021901		ENSMUSG00000021901
ENSMUSG00000021902		ENSMUSG00000021902
ENSMUSG00000021911		ENSMUSG00000021911
ENSMUSG00000021916		ENSMUSG00000021916
ENSMUSG00000021918		ENSMUSG00000021918
ENSMUSG00000021936		ENSMUSG00000021936
ENSMUSG00000021938		ENSMUSG00000021938
ENSMUSG00000021940		ENSMUSG00000021940
ENSMUSG00000021945		ENSMUSG00000021945
ENSMUSG00000021948		ENSMUSG00000021948
ENSMUSG00000021958		ENSMUSG00000021958
ENSMUSG00000021959		ENSMUSG00000021959
ENSMUSG00000021963		ENSMUSG00000021963
ENSMUSG00000021966		ENSMUSG00000021966
ENSMUSG00000021972		ENSMUSG00000021972
ENSMUSG00000021977		ENSMUSG00000021977
ENSMUSG00000021983		ENSMUSG00000021983
ENSMUSG00000021986		ENSMUSG00000021986
ENSMUSG00000021987		ENSMUSG00000021987
ENSMUSG00000021997		ENSMUSG00000021997
ENSMUSG00000022000		ENSMUSG00000022000
ENSMUSG00000022010		ENSMUSG00000022010
ENSMUSG00000022013		ENSMUSG00000022013
ENSMUSG00000022014		ENSMUSG00000022014
ENSMUSG00000022016		ENSMUSG00000022016
ENSMUSG00000022019		ENSMUSG00000022019
ENSMUSG00000022023		ENSMUSG00000022023
ENSMUSG00000022024		ENSMUSG00000022024
ENSMUSG00000022032		ENSMUSG00000022032
ENSMUSG00000022035		ENSMUSG00000022035
ENSMUSG00000022037		ENSMUSG00000022037
ENSMUSG00000022039		ENSMUSG00000022039
ENSMUSG00000022064		ENSMUSG00000022064
ENSMUSG00000022085		ENSMUSG00000022085
ENSMUSG00000022089		ENSMUSG00000022089
ENSMUSG00000022091		ENSMUSG00000022091
ENSMUSG00000022092		ENSMUSG00000022092
ENSMUSG00000022105		ENSMUSG00000022105
ENSMUSG00000022108		ENSMUSG00000022108
ENSMUSG00000022110		ENSMUSG00000022110
ENSMUSG00000022111		ENSMUSG00000022111
ENSMUSG00000022119		ENSMUSG00000022119
ENSMUSG00000022136		ENSMUSG00000022136
ENSMUSG00000022141		ENSMUSG00000022141
ENSMUSG00000022148		ENSMUSG00000022148
ENSMUSG00000022151		ENSMUSG00000022151
ENSMUSG00000022155		ENSMUSG00000022155
ENSMUSG00000022177		ENSMUSG00000022177
ENSMUSG00000022185		ENSMUSG00000022185
ENSMUSG00000022191		ENSMUSG00000022191
ENSMUSG00000022194		ENSMUSG00000022194
ENSMUSG00000022197		ENSMUSG00000022197
ENSMUSG00000022200		ENSMUSG00000022200
ENSMUSG00000022201		ENSMUSG00000022201
ENSMUSG00000022205		ENSMUSG00000022205
ENSMUSG00000022214		ENSMUSG00000022214
ENSMUSG00000022216		ENSMUSG00000022216
ENSMUSG00000022234		ENSMUSG00000022234
ENSMUSG00000022236		ENSMUSG00000022236
ENSMUSG00000022246		ENSMUSG00000022246
ENSMUSG00000022247		ENSMUSG00000022247
ENSMUSG00000022249		ENSMUSG00000022249
ENSMUSG00000022255		ENSMUSG00000022255
ENSMUSG00000022263		ENSMUSG00000022263
ENSMUSG00000022269		ENSMUSG00000022269
ENSMUSG00000022272		ENSMUSG00000022272
ENSMUSG00000022280		ENSMUSG00000022280
ENSMUSG00000022283		ENSMUSG00000022283
ENSMUSG00000022285		ENSMUSG00000022285
ENSMUSG00000022306		ENSMUSG00000022306
ENSMUSG00000022307		ENSMUSG00000022307
ENSMUSG00000022312		ENSMUSG00000022312
ENSMUSG00000022314		ENSMUSG00000022314
ENSMUSG00000022329		ENSMUSG00000022329
ENSMUSG00000022332		ENSMUSG00000022332
ENSMUSG00000022339		ENSMUSG00000022339
ENSMUSG00000022360		ENSMUSG00000022360
ENSMUSG00000022364		ENSMUSG00000022364
ENSMUSG00000022375		ENSMUSG00000022375
ENSMUSG00000022377		ENSMUSG00000022377
ENSMUSG00000022387		ENSMUSG00000022387
ENSMUSG00000022388		ENSMUSG00000022388
ENSMUSG00000022389		ENSMUSG00000022389
ENSMUSG00000022390		ENSMUSG00000022390
ENSMUSG00000022391		ENSMUSG00000022391
ENSMUSG00000022394		ENSMUSG00000022394
ENSMUSG00000022403		ENSMUSG00000022403
ENSMUSG00000022419		ENSMUSG00000022419
ENSMUSG00000022420		ENSMUSG00000022420
ENSMUSG00000022427		ENSMUSG00000022427
ENSMUSG00000022428		ENSMUSG00000022428
ENSMUSG00000022429		ENSMUSG00000022429
ENSMUSG00000022431		ENSMUSG00000022431
ENSMUSG00000022432		ENSMUSG00000022432
ENSMUSG00000022439		ENSMUSG00000022439
ENSMUSG00000022441		ENSMUSG00000022441
ENSMUSG00000022443		ENSMUSG00000022443
ENSMUSG00000022450		ENSMUSG00000022450
ENSMUSG00000022452		ENSMUSG00000022452
ENSMUSG00000022455		ENSMUSG00000022455
ENSMUSG00000022466		ENSMUSG00000022466
ENSMUSG00000022471		ENSMUSG00000022471
ENSMUSG00000022472		ENSMUSG00000022472
ENSMUSG00000022501		ENSMUSG00000022501
ENSMUSG00000022507		ENSMUSG00000022507
ENSMUSG00000022518		ENSMUSG00000022518
ENSMUSG00000022521		ENSMUSG00000022521
ENSMUSG00000022529		ENSMUSG00000022529
ENSMUSG00000022536		ENSMUSG00000022536
ENSMUSG00000022538		ENSMUSG00000022538
ENSMUSG00000022542		ENSMUSG00000022542
ENSMUSG00000022557		ENSMUSG00000022557
ENSMUSG00000022558		ENSMUSG00000022558
ENSMUSG00000022564		ENSMUSG00000022564
ENSMUSG00000022565		ENSMUSG00000022565
ENSMUSG00000022568		ENSMUSG00000022568
ENSMUSG00000022579		ENSMUSG00000022579
ENSMUSG00000022601		ENSMUSG00000022601
ENSMUSG00000022602		ENSMUSG00000022602
ENSMUSG00000022603		ENSMUSG00000022603
ENSMUSG00000022607		ENSMUSG00000022607
ENSMUSG00000022619		ENSMUSG00000022619
ENSMUSG00000022621		ENSMUSG00000022621
ENSMUSG00000022622		ENSMUSG00000022622
ENSMUSG00000022629		ENSMUSG00000022629
ENSMUSG00000022635		ENSMUSG00000022635
ENSMUSG00000022641		ENSMUSG00000022641
ENSMUSG00000022656		ENSMUSG00000022656
ENSMUSG00000022663		ENSMUSG00000022663
ENSMUSG00000022678		ENSMUSG00000022678
ENSMUSG00000022680		ENSMUSG00000022680
ENSMUSG00000022685		ENSMUSG00000022685
ENSMUSG00000022701		ENSMUSG00000022701
ENSMUSG00000022710		ENSMUSG00000022710
ENSMUSG00000022715		ENSMUSG00000022715
ENSMUSG00000022718		ENSMUSG00000022718
ENSMUSG00000022723		ENSMUSG00000022723
ENSMUSG00000022765		ENSMUSG00000022765
ENSMUSG00000022768		ENSMUSG00000022768
ENSMUSG00000022770		ENSMUSG00000022770
ENSMUSG00000022771		ENSMUSG00000022771
ENSMUSG00000022774		ENSMUSG00000022774
ENSMUSG00000022787		ENSMUSG00000022787
ENSMUSG00000022789		ENSMUSG00000022789
ENSMUSG00000022790		ENSMUSG00000022790
ENSMUSG00000022791		ENSMUSG00000022791
ENSMUSG00000022800		ENSMUSG00000022800
ENSMUSG00000022805		ENSMUSG00000022805
ENSMUSG00000022808		ENSMUSG00000022808
ENSMUSG00000022811		ENSMUSG00000022811
ENSMUSG00000022832		ENSMUSG00000022832
ENSMUSG00000022837		ENSMUSG00000022837
ENSMUSG00000022855		ENSMUSG00000022855
ENSMUSG00000022858		ENSMUSG00000022858
ENSMUSG00000022867		ENSMUSG00000022867
ENSMUSG00000022883		ENSMUSG00000022883
ENSMUSG00000022884		ENSMUSG00000022884
ENSMUSG00000022889		ENSMUSG00000022889
ENSMUSG00000022892		ENSMUSG00000022892
ENSMUSG00000022897		ENSMUSG00000022897
ENSMUSG00000022911		ENSMUSG00000022911
ENSMUSG00000022914		ENSMUSG00000022914
ENSMUSG00000022957		ENSMUSG00000022957
ENSMUSG00000022961		ENSMUSG00000022961
ENSMUSG00000022972		ENSMUSG00000022972
ENSMUSG00000022974		ENSMUSG00000022974
ENSMUSG00000022982		ENSMUSG00000022982
ENSMUSG00000022995		ENSMUSG00000022995
ENSMUSG00000023007		ENSMUSG00000023007
ENSMUSG00000023010		ENSMUSG00000023010
ENSMUSG00000023027		ENSMUSG00000023027
ENSMUSG00000023032		ENSMUSG00000023032
ENSMUSG00000023055		ENSMUSG00000023055
ENSMUSG00000023072		ENSMUSG00000023072
ENSMUSG00000023084		ENSMUSG00000023084
ENSMUSG00000023088		ENSMUSG00000023088
ENSMUSG00000023104		ENSMUSG00000023104
ENSMUSG00000023106		ENSMUSG00000023106
ENSMUSG00000023118		ENSMUSG00000023118
ENSMUSG00000023150		ENSMUSG00000023150
ENSMUSG00000023170		ENSMUSG00000023170
ENSMUSG00000023175		ENSMUSG00000023175
ENSMUSG00000023257		ENSMUSG00000023257
ENSMUSG00000023272		ENSMUSG00000023272
ENSMUSG00000023350		ENSMUSG00000023350
ENSMUSG00000023456		ENSMUSG00000023456
ENSMUSG00000023467		ENSMUSG00000023467
ENSMUSG00000023505		ENSMUSG00000023505
ENSMUSG00000023805		ENSMUSG00000023805
ENSMUSG00000023806		ENSMUSG00000023806
ENSMUSG00000023830		ENSMUSG00000023830
ENSMUSG00000023852		ENSMUSG00000023852
ENSMUSG00000023868		ENSMUSG00000023868
ENSMUSG00000023873		ENSMUSG00000023873
ENSMUSG00000023883		ENSMUSG00000023883
ENSMUSG00000023919		ENSMUSG00000023919
ENSMUSG00000023923		ENSMUSG00000023923
ENSMUSG00000023930		ENSMUSG00000023930
ENSMUSG00000023931		ENSMUSG00000023931
ENSMUSG00000023932		ENSMUSG00000023932
ENSMUSG00000023938		ENSMUSG00000023938
ENSMUSG00000023944		ENSMUSG00000023944
ENSMUSG00000023952		ENSMUSG00000023952
ENSMUSG00000023977		ENSMUSG00000023977
ENSMUSG00000023984		ENSMUSG00000023984
ENSMUSG00000024002		ENSMUSG00000024002
ENSMUSG00000024006		ENSMUSG00000024006
ENSMUSG00000024033		ENSMUSG00000024033
ENSMUSG00000024044		ENSMUSG00000024044
ENSMUSG00000024045		ENSMUSG00000024045
ENSMUSG00000024049		ENSMUSG00000024049
ENSMUSG00000024056		ENSMUSG00000024056
ENSMUSG00000024059		ENSMUSG00000024059
ENSMUSG00000024067		ENSMUSG00000024067
ENSMUSG00000024068		ENSMUSG00000024068
ENSMUSG00000024073		ENSMUSG00000024073
ENSMUSG00000024077		ENSMUSG00000024077
ENSMUSG00000024079		ENSMUSG00000024079
ENSMUSG00000024081		ENSMUSG00000024081
ENSMUSG00000024083		ENSMUSG00000024083
ENSMUSG00000024085		ENSMUSG00000024085
ENSMUSG00000024091		ENSMUSG00000024091
ENSMUSG00000024095		ENSMUSG00000024095
ENSMUSG00000024096		ENSMUSG00000024096
ENSMUSG00000024097		ENSMUSG00000024097
ENSMUSG00000024099		ENSMUSG00000024099
ENSMUSG00000024104		ENSMUSG00000024104
ENSMUSG00000024109		ENSMUSG00000024109
ENSMUSG00000024154		ENSMUSG00000024154
ENSMUSG00000024158		ENSMUSG00000024158
ENSMUSG00000024163		ENSMUSG00000024163
ENSMUSG00000024169		ENSMUSG00000024169
ENSMUSG00000024175		ENSMUSG00000024175
ENSMUSG00000024182		ENSMUSG00000024182
ENSMUSG00000024187		ENSMUSG00000024187
ENSMUSG00000024188		ENSMUSG00000024188
ENSMUSG00000024193		ENSMUSG00000024193
ENSMUSG00000024209		ENSMUSG00000024209
ENSMUSG00000024213		ENSMUSG00000024213
ENSMUSG00000024218		ENSMUSG00000024218
ENSMUSG00000024222		ENSMUSG00000024222
ENSMUSG00000024236		ENSMUSG00000024236
ENSMUSG00000024238		ENSMUSG00000024238
ENSMUSG00000024242		ENSMUSG00000024242
ENSMUSG00000024253		ENSMUSG00000024253
ENSMUSG00000024259		ENSMUSG00000024259
ENSMUSG00000024260		ENSMUSG00000024260
ENSMUSG00000024270		ENSMUSG00000024270
ENSMUSG00000024277		ENSMUSG00000024277
ENSMUSG00000024286		ENSMUSG00000024286
ENSMUSG00000024287		ENSMUSG00000024287
ENSMUSG00000024290		ENSMUSG00000024290
ENSMUSG00000024294		ENSMUSG00000024294
ENSMUSG00000024306		ENSMUSG00000024306
ENSMUSG00000024309		ENSMUSG00000024309
ENSMUSG00000024312		ENSMUSG00000024312
ENSMUSG00000024317		ENSMUSG00000024317
ENSMUSG00000024335		ENSMUSG00000024335
ENSMUSG00000024346		ENSMUSG00000024346
ENSMUSG00000024350		ENSMUSG00000024350
ENSMUSG00000024352		ENSMUSG00000024352
ENSMUSG00000024357		ENSMUSG00000024357
ENSMUSG00000024359		ENSMUSG00000024359
ENSMUSG00000024360		ENSMUSG00000024360
ENSMUSG00000024369		ENSMUSG00000024369
ENSMUSG00000024382		ENSMUSG00000024382
ENSMUSG00000024384		ENSMUSG00000024384
ENSMUSG00000024387		ENSMUSG00000024387
ENSMUSG00000024392		ENSMUSG00000024392
ENSMUSG00000024393		ENSMUSG00000024393
ENSMUSG00000024397		ENSMUSG00000024397
ENSMUSG00000024400		ENSMUSG00000024400
ENSMUSG00000024404		ENSMUSG00000024404
ENSMUSG00000024422		ENSMUSG00000024422
ENSMUSG00000024425		ENSMUSG00000024425
ENSMUSG00000024429		ENSMUSG00000024429
ENSMUSG00000024430		ENSMUSG00000024430
ENSMUSG00000024456		ENSMUSG00000024456
ENSMUSG00000024457		ENSMUSG00000024457
ENSMUSG00000024474		ENSMUSG00000024474
ENSMUSG00000024483		ENSMUSG00000024483
ENSMUSG00000024487		ENSMUSG00000024487
ENSMUSG00000024491		ENSMUSG00000024491
ENSMUSG00000024498		ENSMUSG00000024498
ENSMUSG00000024501		ENSMUSG00000024501
ENSMUSG00000024507		ENSMUSG00000024507
ENSMUSG00000024513		ENSMUSG00000024513
ENSMUSG00000024527		ENSMUSG00000024527
ENSMUSG00000024532		ENSMUSG00000024532
ENSMUSG00000024539		ENSMUSG00000024539
ENSMUSG00000024542		ENSMUSG00000024542
ENSMUSG00000024560		ENSMUSG00000024560
ENSMUSG00000024566		ENSMUSG00000024566
ENSMUSG00000024576		ENSMUSG00000024576
ENSMUSG00000024583		ENSMUSG00000024583
ENSMUSG00000024587		ENSMUSG00000024587
ENSMUSG00000024590		ENSMUSG00000024590
ENSMUSG00000024608		ENSMUSG00000024608
ENSMUSG00000024614		ENSMUSG00000024614
ENSMUSG00000024654		ENSMUSG00000024654
ENSMUSG00000024658		ENSMUSG00000024658
ENSMUSG00000024660		ENSMUSG00000024660
ENSMUSG00000024661		ENSMUSG00000024661
ENSMUSG00000024663		ENSMUSG00000024663
ENSMUSG00000024687		ENSMUSG00000024687
ENSMUSG00000024695		ENSMUSG00000024695
ENSMUSG00000024740		ENSMUSG00000024740
ENSMUSG00000024749		ENSMUSG00000024749
ENSMUSG00000024759		ENSMUSG00000024759
ENSMUSG00000024772		ENSMUSG00000024772
ENSMUSG00000024773		ENSMUSG00000024773
ENSMUSG00000024780		ENSMUSG00000024780
ENSMUSG00000024786		ENSMUSG00000024786
ENSMUSG00000024795		ENSMUSG00000024795
ENSMUSG00000024805		ENSMUSG00000024805
ENSMUSG00000024812		ENSMUSG00000024812
ENSMUSG00000024841		ENSMUSG00000024841
ENSMUSG00000024843		ENSMUSG00000024843
ENSMUSG00000024853		ENSMUSG00000024853
ENSMUSG00000024862		ENSMUSG00000024862
ENSMUSG00000024878		ENSMUSG00000024878
ENSMUSG00000024885		ENSMUSG00000024885
ENSMUSG00000024897		ENSMUSG00000024897
ENSMUSG00000024900		ENSMUSG00000024900
ENSMUSG00000024908		ENSMUSG00000024908
ENSMUSG00000024913		ENSMUSG00000024913
ENSMUSG00000024914		ENSMUSG00000024914
ENSMUSG00000024921		ENSMUSG00000024921
ENSMUSG00000024927		ENSMUSG00000024927
ENSMUSG00000024937		ENSMUSG00000024937
ENSMUSG00000024943		ENSMUSG00000024943
ENSMUSG00000024947		ENSMUSG00000024947
ENSMUSG00000024949		ENSMUSG00000024949
ENSMUSG00000024957		ENSMUSG00000024957
ENSMUSG00000024958		ENSMUSG00000024958
ENSMUSG00000024959		ENSMUSG00000024959
ENSMUSG00000024960		ENSMUSG00000024960
ENSMUSG00000024963		ENSMUSG00000024963
ENSMUSG00000024966		ENSMUSG00000024966
ENSMUSG00000024969		ENSMUSG00000024969
ENSMUSG00000024973		ENSMUSG00000024973
ENSMUSG00000024974		ENSMUSG00000024974
ENSMUSG00000024975		ENSMUSG00000024975
ENSMUSG00000024983		ENSMUSG00000024983
ENSMUSG00000024989		ENSMUSG00000024989
ENSMUSG00000024991		ENSMUSG00000024991
ENSMUSG00000024999		ENSMUSG00000024999
ENSMUSG00000025001		ENSMUSG00000025001
ENSMUSG00000025016		ENSMUSG00000025016
ENSMUSG00000025019		ENSMUSG00000025019
ENSMUSG00000025025		ENSMUSG00000025025
ENSMUSG00000025027		ENSMUSG00000025027
ENSMUSG00000025035		ENSMUSG00000025035
ENSMUSG00000025041		ENSMUSG00000025041
ENSMUSG00000025044		ENSMUSG00000025044
ENSMUSG00000025047		ENSMUSG00000025047
ENSMUSG00000025049		ENSMUSG00000025049
ENSMUSG00000025050		ENSMUSG00000025050
ENSMUSG00000025060		ENSMUSG00000025060
ENSMUSG00000025066		ENSMUSG00000025066
ENSMUSG00000025081		ENSMUSG00000025081
ENSMUSG00000025103		ENSMUSG00000025103
ENSMUSG00000025104		ENSMUSG00000025104
ENSMUSG00000025130		ENSMUSG00000025130
ENSMUSG00000025132		ENSMUSG00000025132
ENSMUSG00000025137		ENSMUSG00000025137
ENSMUSG00000025151		ENSMUSG00000025151
ENSMUSG00000025155		ENSMUSG00000025155
ENSMUSG00000025156		ENSMUSG00000025156
ENSMUSG00000025171		ENSMUSG00000025171
ENSMUSG00000025176		ENSMUSG00000025176
ENSMUSG00000025203		ENSMUSG00000025203
ENSMUSG00000025204		ENSMUSG00000025204
ENSMUSG00000025220		ENSMUSG00000025220
ENSMUSG00000025228		ENSMUSG00000025228
ENSMUSG00000025231		ENSMUSG00000025231
ENSMUSG00000025234		ENSMUSG00000025234
ENSMUSG00000025241		ENSMUSG00000025241
ENSMUSG00000025261		ENSMUSG00000025261
ENSMUSG00000025288		ENSMUSG00000025288
ENSMUSG00000025289		ENSMUSG00000025289
ENSMUSG00000025290		ENSMUSG00000025290
ENSMUSG00000025326		ENSMUSG00000025326
ENSMUSG00000025337		ENSMUSG00000025337
ENSMUSG00000025357		ENSMUSG00000025357
ENSMUSG00000025358		ENSMUSG00000025358
ENSMUSG00000025362		ENSMUSG00000025362
ENSMUSG00000025364		ENSMUSG00000025364
ENSMUSG00000025369		ENSMUSG00000025369
ENSMUSG00000025371		ENSMUSG00000025371
ENSMUSG00000025372		ENSMUSG00000025372
ENSMUSG00000025393		ENSMUSG00000025393
ENSMUSG00000025404		ENSMUSG00000025404
ENSMUSG00000025408		ENSMUSG00000025408
ENSMUSG00000025410		ENSMUSG00000025410
ENSMUSG00000025413		ENSMUSG00000025413
ENSMUSG00000025420		ENSMUSG00000025420
ENSMUSG00000025428		ENSMUSG00000025428
ENSMUSG00000025437		ENSMUSG00000025437
ENSMUSG00000025439		ENSMUSG00000025439
ENSMUSG00000025451		ENSMUSG00000025451
ENSMUSG00000025453		ENSMUSG00000025453
ENSMUSG00000025474		ENSMUSG00000025474
ENSMUSG00000025477		ENSMUSG00000025477
ENSMUSG00000025480		ENSMUSG00000025480
ENSMUSG00000025487		ENSMUSG00000025487
ENSMUSG00000025508		ENSMUSG00000025508
ENSMUSG00000025532		ENSMUSG00000025532
ENSMUSG00000025571		ENSMUSG00000025571
ENSMUSG00000025584		ENSMUSG00000025584
ENSMUSG00000025592		ENSMUSG00000025592
ENSMUSG00000025607		ENSMUSG00000025607
ENSMUSG00000025613		ENSMUSG00000025613
ENSMUSG00000025616		ENSMUSG00000025616
ENSMUSG00000025626		ENSMUSG00000025626
ENSMUSG00000025651		ENSMUSG00000025651
ENSMUSG00000025745		ENSMUSG00000025745
ENSMUSG00000025757		ENSMUSG00000025757
ENSMUSG00000025762		ENSMUSG00000025762
ENSMUSG00000025782		ENSMUSG00000025782
ENSMUSG00000025783		ENSMUSG00000025783
ENSMUSG00000025808		ENSMUSG00000025808
ENSMUSG00000025823		ENSMUSG00000025823
ENSMUSG00000025862		ENSMUSG00000025862
ENSMUSG00000025873		ENSMUSG00000025873
ENSMUSG00000025878		ENSMUSG00000025878
ENSMUSG00000025885		ENSMUSG00000025885
ENSMUSG00000025894		ENSMUSG00000025894
ENSMUSG00000025898		ENSMUSG00000025898
ENSMUSG00000025907		ENSMUSG00000025907
ENSMUSG00000025912		ENSMUSG00000025912
ENSMUSG00000025916		ENSMUSG00000025916
ENSMUSG00000025925		ENSMUSG00000025925
ENSMUSG00000025950		ENSMUSG00000025950
ENSMUSG00000025955		ENSMUSG00000025955
ENSMUSG00000025968		ENSMUSG00000025968
ENSMUSG00000025977		ENSMUSG00000025977
ENSMUSG00000025982		ENSMUSG00000025982
ENSMUSG00000025983		ENSMUSG00000025983
ENSMUSG00000025986		ENSMUSG00000025986
ENSMUSG00000026018		ENSMUSG00000026018
ENSMUSG00000026020		ENSMUSG00000026020
ENSMUSG00000026021		ENSMUSG00000026021
ENSMUSG00000026034		ENSMUSG00000026034
ENSMUSG00000026049		ENSMUSG00000026049
ENSMUSG00000026062		ENSMUSG00000026062
ENSMUSG00000026074		ENSMUSG00000026074
ENSMUSG00000026078		ENSMUSG00000026078
ENSMUSG00000026082		ENSMUSG00000026082
ENSMUSG00000026083		ENSMUSG00000026083
ENSMUSG00000026107		ENSMUSG00000026107
ENSMUSG00000026110		ENSMUSG00000026110
ENSMUSG00000026113		ENSMUSG00000026113
ENSMUSG00000026131		ENSMUSG00000026131
ENSMUSG00000026134		ENSMUSG00000026134
ENSMUSG00000026142		ENSMUSG00000026142
ENSMUSG00000026153		ENSMUSG00000026153
ENSMUSG00000026155		ENSMUSG00000026155
ENSMUSG00000026171		ENSMUSG00000026171
ENSMUSG00000026173		ENSMUSG00000026173
ENSMUSG00000026179		ENSMUSG00000026179
ENSMUSG00000026182		ENSMUSG00000026182
ENSMUSG00000026202		ENSMUSG00000026202
ENSMUSG00000026203		ENSMUSG00000026203
ENSMUSG00000026213		ENSMUSG00000026213
ENSMUSG00000026219		ENSMUSG00000026219
ENSMUSG00000026226		ENSMUSG00000026226
ENSMUSG00000026229		ENSMUSG00000026229
ENSMUSG00000026234		ENSMUSG00000026234
ENSMUSG00000026238		ENSMUSG00000026238
ENSMUSG00000026254		ENSMUSG00000026254
ENSMUSG00000026255		ENSMUSG00000026255
ENSMUSG00000026274		ENSMUSG00000026274
ENSMUSG00000026275		ENSMUSG00000026275
ENSMUSG00000026277		ENSMUSG00000026277
ENSMUSG00000026289		ENSMUSG00000026289
ENSMUSG00000026301		ENSMUSG00000026301
ENSMUSG00000026319		ENSMUSG00000026319
ENSMUSG00000026331		ENSMUSG00000026331
ENSMUSG00000026335		ENSMUSG00000026335
ENSMUSG00000026336		ENSMUSG00000026336
ENSMUSG00000026339		ENSMUSG00000026339
ENSMUSG00000026341		ENSMUSG00000026341
ENSMUSG00000026353		ENSMUSG00000026353
ENSMUSG00000026356		ENSMUSG00000026356
ENSMUSG00000026361		ENSMUSG00000026361
ENSMUSG00000026385		ENSMUSG00000026385
ENSMUSG00000026401		ENSMUSG00000026401
ENSMUSG00000026409		ENSMUSG00000026409
ENSMUSG00000026414		ENSMUSG00000026414
ENSMUSG00000026425		ENSMUSG00000026425
ENSMUSG00000026429		ENSMUSG00000026429
ENSMUSG00000026434		ENSMUSG00000026434
ENSMUSG00000026463		ENSMUSG00000026463
ENSMUSG00000026466		ENSMUSG00000026466
ENSMUSG00000026469		ENSMUSG00000026469
ENSMUSG00000026470		ENSMUSG00000026470
ENSMUSG00000026482		ENSMUSG00000026482
ENSMUSG00000026484		ENSMUSG00000026484
ENSMUSG00000026491		ENSMUSG00000026491
ENSMUSG00000026495		ENSMUSG00000026495
ENSMUSG00000026496		ENSMUSG00000026496
ENSMUSG00000026499		ENSMUSG00000026499
ENSMUSG00000026504		ENSMUSG00000026504
ENSMUSG00000026523		ENSMUSG00000026523
ENSMUSG00000026532		ENSMUSG00000026532
ENSMUSG00000026546		ENSMUSG00000026546
ENSMUSG00000026553		ENSMUSG00000026553
ENSMUSG00000026554		ENSMUSG00000026554
ENSMUSG00000026567		ENSMUSG00000026567
ENSMUSG00000026571		ENSMUSG00000026571
ENSMUSG00000026572		ENSMUSG00000026572
ENSMUSG00000026576		ENSMUSG00000026576
ENSMUSG00000026577		ENSMUSG00000026577
ENSMUSG00000026578		ENSMUSG00000026578
ENSMUSG00000026585		ENSMUSG00000026585
ENSMUSG00000026592		ENSMUSG00000026592
ENSMUSG00000026601		ENSMUSG00000026601
ENSMUSG00000026605		ENSMUSG00000026605
ENSMUSG00000026615		ENSMUSG00000026615
ENSMUSG00000026622		ENSMUSG00000026622
ENSMUSG00000026623		ENSMUSG00000026623
ENSMUSG00000026626		ENSMUSG00000026626
ENSMUSG00000026643		ENSMUSG00000026643
ENSMUSG00000026650		ENSMUSG00000026650
ENSMUSG00000026655		ENSMUSG00000026655
ENSMUSG00000026672		ENSMUSG00000026672
ENSMUSG00000026679		ENSMUSG00000026679
ENSMUSG00000026683		ENSMUSG00000026683
ENSMUSG00000026696		ENSMUSG00000026696
ENSMUSG00000026712		ENSMUSG00000026712
ENSMUSG00000026721		ENSMUSG00000026721
ENSMUSG00000026728		ENSMUSG00000026728
ENSMUSG00000026734		ENSMUSG00000026734
ENSMUSG00000026739		ENSMUSG00000026739
ENSMUSG00000026740		ENSMUSG00000026740
ENSMUSG00000026743		ENSMUSG00000026743
ENSMUSG00000026754		ENSMUSG00000026754
ENSMUSG00000026755		ENSMUSG00000026755
ENSMUSG00000026761		ENSMUSG00000026761
ENSMUSG00000026764		ENSMUSG00000026764
ENSMUSG00000026774		ENSMUSG00000026774
ENSMUSG00000026775		ENSMUSG00000026775
ENSMUSG00000026781		ENSMUSG00000026781
ENSMUSG00000026782		ENSMUSG00000026782
ENSMUSG00000026790		ENSMUSG00000026790
ENSMUSG00000026803		ENSMUSG00000026803
ENSMUSG00000026807		ENSMUSG00000026807
ENSMUSG00000026812		ENSMUSG00000026812
ENSMUSG00000026817		ENSMUSG00000026817
ENSMUSG00000026819		ENSMUSG00000026819
ENSMUSG00000026821		ENSMUSG00000026821
ENSMUSG00000026822		ENSMUSG00000026822
ENSMUSG00000026827		ENSMUSG00000026827
ENSMUSG00000026837		ENSMUSG00000026837
ENSMUSG00000026851		ENSMUSG00000026851
ENSMUSG00000026853		ENSMUSG00000026853
ENSMUSG00000026864		ENSMUSG00000026864
ENSMUSG00000026867		ENSMUSG00000026867
ENSMUSG00000026872		ENSMUSG00000026872
ENSMUSG00000026883		ENSMUSG00000026883
ENSMUSG00000026894		ENSMUSG00000026894
ENSMUSG00000026914		ENSMUSG00000026914
ENSMUSG00000026915		ENSMUSG00000026915
ENSMUSG00000026918		ENSMUSG00000026918
ENSMUSG00000026926		ENSMUSG00000026926
ENSMUSG00000026927		ENSMUSG00000026927
ENSMUSG00000026931		ENSMUSG00000026931
ENSMUSG00000026933		ENSMUSG00000026933
ENSMUSG00000026940		ENSMUSG00000026940
ENSMUSG00000026969		ENSMUSG00000026969
ENSMUSG00000026970		ENSMUSG00000026970
ENSMUSG00000026987		ENSMUSG00000026987
ENSMUSG00000026994		ENSMUSG00000026994
ENSMUSG00000027006		ENSMUSG00000027006
ENSMUSG00000027012		ENSMUSG00000027012
ENSMUSG00000027030		ENSMUSG00000027030
ENSMUSG00000027067		ENSMUSG00000027067
ENSMUSG00000027071		ENSMUSG00000027071
ENSMUSG00000027077		ENSMUSG00000027077
ENSMUSG00000027080		ENSMUSG00000027080
ENSMUSG00000027086		ENSMUSG00000027086
ENSMUSG00000027088		ENSMUSG00000027088
ENSMUSG00000027091		ENSMUSG00000027091
ENSMUSG00000027102		ENSMUSG00000027102
ENSMUSG00000027108		ENSMUSG00000027108
ENSMUSG00000027130		ENSMUSG00000027130
ENSMUSG00000027157		ENSMUSG00000027157
ENSMUSG00000027160		ENSMUSG00000027160
ENSMUSG00000027162		ENSMUSG00000027162
ENSMUSG00000027165		ENSMUSG00000027165
ENSMUSG00000027176		ENSMUSG00000027176
ENSMUSG00000027180		ENSMUSG00000027180
ENSMUSG00000027184		ENSMUSG00000027184
ENSMUSG00000027185		ENSMUSG00000027185
ENSMUSG00000027189		ENSMUSG00000027189
ENSMUSG00000027201		ENSMUSG00000027201
ENSMUSG00000027209		ENSMUSG00000027209
ENSMUSG00000027227		ENSMUSG00000027227
ENSMUSG00000027236		ENSMUSG00000027236
ENSMUSG00000027245		ENSMUSG00000027245
ENSMUSG00000027248		ENSMUSG00000027248
ENSMUSG00000027276		ENSMUSG00000027276
ENSMUSG00000027281		ENSMUSG00000027281
ENSMUSG00000027282		ENSMUSG00000027282
ENSMUSG00000027284		ENSMUSG00000027284
ENSMUSG00000027286		ENSMUSG00000027286
ENSMUSG00000027287		ENSMUSG00000027287
ENSMUSG00000027288		ENSMUSG00000027288
ENSMUSG00000027304		ENSMUSG00000027304
ENSMUSG00000027306		ENSMUSG00000027306
ENSMUSG00000027309		ENSMUSG00000027309
ENSMUSG00000027326		ENSMUSG00000027326
ENSMUSG00000027331		ENSMUSG00000027331
ENSMUSG00000027344		ENSMUSG00000027344
ENSMUSG00000027346		ENSMUSG00000027346
ENSMUSG00000027350		ENSMUSG00000027350
ENSMUSG00000027355		ENSMUSG00000027355
ENSMUSG00000027363		ENSMUSG00000027363
ENSMUSG00000027365		ENSMUSG00000027365
ENSMUSG00000027366		ENSMUSG00000027366
ENSMUSG00000027374		ENSMUSG00000027374
ENSMUSG00000027378		ENSMUSG00000027378
ENSMUSG00000027404		ENSMUSG00000027404
ENSMUSG00000027405		ENSMUSG00000027405
ENSMUSG00000027422		ENSMUSG00000027422
ENSMUSG00000027433		ENSMUSG00000027433
ENSMUSG00000027439		ENSMUSG00000027439
ENSMUSG00000027442		ENSMUSG00000027442
ENSMUSG00000027443		ENSMUSG00000027443
ENSMUSG00000027445		ENSMUSG00000027445
ENSMUSG00000027447		ENSMUSG00000027447
ENSMUSG00000027455		ENSMUSG00000027455
ENSMUSG00000027469		ENSMUSG00000027469
ENSMUSG00000027475		ENSMUSG00000027475
ENSMUSG00000027480		ENSMUSG00000027480
ENSMUSG00000027502		ENSMUSG00000027502
ENSMUSG00000027517		ENSMUSG00000027517
ENSMUSG00000027520		ENSMUSG00000027520
ENSMUSG00000027522		ENSMUSG00000027522
ENSMUSG00000027525		ENSMUSG00000027525
ENSMUSG00000027528		ENSMUSG00000027528
ENSMUSG00000027531		ENSMUSG00000027531
ENSMUSG00000027550		ENSMUSG00000027550
ENSMUSG00000027562		ENSMUSG00000027562
ENSMUSG00000027569		ENSMUSG00000027569
ENSMUSG00000027575		ENSMUSG00000027575
ENSMUSG00000027582		ENSMUSG00000027582
ENSMUSG00000027593		ENSMUSG00000027593
ENSMUSG00000027596		ENSMUSG00000027596
ENSMUSG00000027601		ENSMUSG00000027601
ENSMUSG00000027602		ENSMUSG00000027602
ENSMUSG00000027605		ENSMUSG00000027605
ENSMUSG00000027606		ENSMUSG00000027606
ENSMUSG00000027620		ENSMUSG00000027620
ENSMUSG00000027630		ENSMUSG00000027630
ENSMUSG00000027642		ENSMUSG00000027642
ENSMUSG00000027649		ENSMUSG00000027649
ENSMUSG00000027668		ENSMUSG00000027668
ENSMUSG00000027671		ENSMUSG00000027671
ENSMUSG00000027676		ENSMUSG00000027676
ENSMUSG00000027677		ENSMUSG00000027677
ENSMUSG00000027680		ENSMUSG00000027680
ENSMUSG00000027692		ENSMUSG00000027692
ENSMUSG00000027694		ENSMUSG00000027694
ENSMUSG00000027699		ENSMUSG00000027699
ENSMUSG00000027703		ENSMUSG00000027703
ENSMUSG00000027706		ENSMUSG00000027706
ENSMUSG00000027708		ENSMUSG00000027708
ENSMUSG00000027714		ENSMUSG00000027714
ENSMUSG00000027719		ENSMUSG00000027719
ENSMUSG00000027722		ENSMUSG00000027722
ENSMUSG00000027751		ENSMUSG00000027751
ENSMUSG00000027770		ENSMUSG00000027770
ENSMUSG00000027778		ENSMUSG00000027778
ENSMUSG00000027782		ENSMUSG00000027782
ENSMUSG00000027799		ENSMUSG00000027799
ENSMUSG00000027804		ENSMUSG00000027804
ENSMUSG00000027823		ENSMUSG00000027823
ENSMUSG00000027849		ENSMUSG00000027849
ENSMUSG00000027855		ENSMUSG00000027855
ENSMUSG00000027867		ENSMUSG00000027867
ENSMUSG00000027871		ENSMUSG00000027871
ENSMUSG00000027881		ENSMUSG00000027881
ENSMUSG00000027886		ENSMUSG00000027886
ENSMUSG00000027893		ENSMUSG00000027893
ENSMUSG00000027931		ENSMUSG00000027931
ENSMUSG00000027935		ENSMUSG00000027935
ENSMUSG00000027938		ENSMUSG00000027938
ENSMUSG00000027940		ENSMUSG00000027940
ENSMUSG00000027959		ENSMUSG00000027959
ENSMUSG00000027968		ENSMUSG00000027968
ENSMUSG00000027981		ENSMUSG00000027981
ENSMUSG00000028010		ENSMUSG00000028010
ENSMUSG00000028028		ENSMUSG00000028028
ENSMUSG00000028033		ENSMUSG00000028033
ENSMUSG00000028034		ENSMUSG00000028034
ENSMUSG00000028035		ENSMUSG00000028035
ENSMUSG00000028047		ENSMUSG00000028047
ENSMUSG00000028053		ENSMUSG00000028053
ENSMUSG00000028059		ENSMUSG00000028059
ENSMUSG00000028060		ENSMUSG00000028060
ENSMUSG00000028069		ENSMUSG00000028069
ENSMUSG00000028073		ENSMUSG00000028073
ENSMUSG00000028081		ENSMUSG00000028081
ENSMUSG00000028086		ENSMUSG00000028086
ENSMUSG00000028089		ENSMUSG00000028089
ENSMUSG00000028099		ENSMUSG00000028099
ENSMUSG00000028104		ENSMUSG00000028104
ENSMUSG00000028109		ENSMUSG00000028109
ENSMUSG00000028126		ENSMUSG00000028126
ENSMUSG00000028127		ENSMUSG00000028127
ENSMUSG00000028136		ENSMUSG00000028136
ENSMUSG00000028137		ENSMUSG00000028137
ENSMUSG00000028139		ENSMUSG00000028139
ENSMUSG00000028141		ENSMUSG00000028141
ENSMUSG00000028156		ENSMUSG00000028156
ENSMUSG00000028180		ENSMUSG00000028180
ENSMUSG00000028182		ENSMUSG00000028182
ENSMUSG00000028188		ENSMUSG00000028188
ENSMUSG00000028218		ENSMUSG00000028218
ENSMUSG00000028224		ENSMUSG00000028224
ENSMUSG00000028234		ENSMUSG00000028234
ENSMUSG00000028248		ENSMUSG00000028248
ENSMUSG00000028274		ENSMUSG00000028274
ENSMUSG00000028277		ENSMUSG00000028277
ENSMUSG00000028282		ENSMUSG00000028282
ENSMUSG00000028294		ENSMUSG00000028294
ENSMUSG00000028309		ENSMUSG00000028309
ENSMUSG00000028312		ENSMUSG00000028312
ENSMUSG00000028328		ENSMUSG00000028328
ENSMUSG00000028329		ENSMUSG00000028329
ENSMUSG00000028330		ENSMUSG00000028330
ENSMUSG00000028332		ENSMUSG00000028332
ENSMUSG00000028333		ENSMUSG00000028333
ENSMUSG00000028347		ENSMUSG00000028347
ENSMUSG00000028383		ENSMUSG00000028383
ENSMUSG00000028389		ENSMUSG00000028389
ENSMUSG00000028392		ENSMUSG00000028392
ENSMUSG00000028394		ENSMUSG00000028394
ENSMUSG00000028397		ENSMUSG00000028397
ENSMUSG00000028399		ENSMUSG00000028399
ENSMUSG00000028409		ENSMUSG00000028409
ENSMUSG00000028410		ENSMUSG00000028410
ENSMUSG00000028411		ENSMUSG00000028411
ENSMUSG00000028416		ENSMUSG00000028416
ENSMUSG00000028419		ENSMUSG00000028419
ENSMUSG00000028426		ENSMUSG00000028426
ENSMUSG00000028430		ENSMUSG00000028430
ENSMUSG00000028431		ENSMUSG00000028431
ENSMUSG00000028433		ENSMUSG00000028433
ENSMUSG00000028441		ENSMUSG00000028441
ENSMUSG00000028456		ENSMUSG00000028456
ENSMUSG00000028457		ENSMUSG00000028457
ENSMUSG00000028458		ENSMUSG00000028458
ENSMUSG00000028464		ENSMUSG00000028464
ENSMUSG00000028478		ENSMUSG00000028478
ENSMUSG00000028484		ENSMUSG00000028484
ENSMUSG00000028494		ENSMUSG00000028494
ENSMUSG00000028495		ENSMUSG00000028495
ENSMUSG00000028496		ENSMUSG00000028496
ENSMUSG00000028514		ENSMUSG00000028514
ENSMUSG00000028519		ENSMUSG00000028519
ENSMUSG00000028520		ENSMUSG00000028520
ENSMUSG00000028522		ENSMUSG00000028522
ENSMUSG00000028530		ENSMUSG00000028530
ENSMUSG00000028533		ENSMUSG00000028533
ENSMUSG00000028549		ENSMUSG00000028549
ENSMUSG00000028551		ENSMUSG00000028551
ENSMUSG00000028552		ENSMUSG00000028552
ENSMUSG00000028555		ENSMUSG00000028555
ENSMUSG00000028558		ENSMUSG00000028558
ENSMUSG00000028559		ENSMUSG00000028559
ENSMUSG00000028560		ENSMUSG00000028560
ENSMUSG00000028568		ENSMUSG00000028568
ENSMUSG00000028572		ENSMUSG00000028572
ENSMUSG00000028575		ENSMUSG00000028575
ENSMUSG00000028576		ENSMUSG00000028576
ENSMUSG00000028577		ENSMUSG00000028577
ENSMUSG00000028580		ENSMUSG00000028580
ENSMUSG00000028582		ENSMUSG00000028582
ENSMUSG00000028607		ENSMUSG00000028607
ENSMUSG00000028613		ENSMUSG00000028613
ENSMUSG00000028617		ENSMUSG00000028617
ENSMUSG00000028629		ENSMUSG00000028629
ENSMUSG00000028637		ENSMUSG00000028637
ENSMUSG00000028639		ENSMUSG00000028639
ENSMUSG00000028643		ENSMUSG00000028643
ENSMUSG00000028649		ENSMUSG00000028649
ENSMUSG00000028668		ENSMUSG00000028668
ENSMUSG00000028676		ENSMUSG00000028676
ENSMUSG00000028677		ENSMUSG00000028677
ENSMUSG00000028678		ENSMUSG00000028678
ENSMUSG00000028689		ENSMUSG00000028689
ENSMUSG00000028693		ENSMUSG00000028693
ENSMUSG00000028698		ENSMUSG00000028698
ENSMUSG00000028700		ENSMUSG00000028700
ENSMUSG00000028729		ENSMUSG00000028729
ENSMUSG00000028730		ENSMUSG00000028730
ENSMUSG00000028745		ENSMUSG00000028745
ENSMUSG00000028758		ENSMUSG00000028758
ENSMUSG00000028759		ENSMUSG00000028759
ENSMUSG00000028760		ENSMUSG00000028760
ENSMUSG00000028793		ENSMUSG00000028793
ENSMUSG00000028795		ENSMUSG00000028795
ENSMUSG00000028809		ENSMUSG00000028809
ENSMUSG00000028820		ENSMUSG00000028820
ENSMUSG00000028821		ENSMUSG00000028821
ENSMUSG00000028826		ENSMUSG00000028826
ENSMUSG00000028832		ENSMUSG00000028832
ENSMUSG00000028845		ENSMUSG00000028845
ENSMUSG00000028849		ENSMUSG00000028849
ENSMUSG00000028850		ENSMUSG00000028850
ENSMUSG00000028851		ENSMUSG00000028851
ENSMUSG00000028863		ENSMUSG00000028863
ENSMUSG00000028868		ENSMUSG00000028868
ENSMUSG00000028869		ENSMUSG00000028869
ENSMUSG00000028873		ENSMUSG00000028873
ENSMUSG00000028878		ENSMUSG00000028878
ENSMUSG00000028896		ENSMUSG00000028896
ENSMUSG00000028899		ENSMUSG00000028899
ENSMUSG00000028901		ENSMUSG00000028901
ENSMUSG00000028902		ENSMUSG00000028902
ENSMUSG00000028911		ENSMUSG00000028911
ENSMUSG00000028917		ENSMUSG00000028917
ENSMUSG00000028932		ENSMUSG00000028932
ENSMUSG00000028936		ENSMUSG00000028936
ENSMUSG00000028937		ENSMUSG00000028937
ENSMUSG00000028938		ENSMUSG00000028938
ENSMUSG00000028943		ENSMUSG00000028943
ENSMUSG00000028944		ENSMUSG00000028944
ENSMUSG00000028953		ENSMUSG00000028953
ENSMUSG00000028954		ENSMUSG00000028954
ENSMUSG00000028962		ENSMUSG00000028962
ENSMUSG00000028976		ENSMUSG00000028976
ENSMUSG00000028991		ENSMUSG00000028991
ENSMUSG00000028995		ENSMUSG00000028995
ENSMUSG00000028998		ENSMUSG00000028998
ENSMUSG00000029001		ENSMUSG00000029001
ENSMUSG00000029003		ENSMUSG00000029003
ENSMUSG00000029004		ENSMUSG00000029004
ENSMUSG00000029009		ENSMUSG00000029009
ENSMUSG00000029014		ENSMUSG00000029014
ENSMUSG00000029017		ENSMUSG00000029017
ENSMUSG00000029020		ENSMUSG00000029020
ENSMUSG00000029022		ENSMUSG00000029022
ENSMUSG00000029028		ENSMUSG00000029028
ENSMUSG00000029036		ENSMUSG00000029036
ENSMUSG00000029038		ENSMUSG00000029038
ENSMUSG00000029048		ENSMUSG00000029048
ENSMUSG00000029062		ENSMUSG00000029062
ENSMUSG00000029066		ENSMUSG00000029066
ENSMUSG00000029068		ENSMUSG00000029068
ENSMUSG00000029071		ENSMUSG00000029071
ENSMUSG00000029074		ENSMUSG00000029074
ENSMUSG00000029076		ENSMUSG00000029076
ENSMUSG00000029086		ENSMUSG00000029086
ENSMUSG00000029094		ENSMUSG00000029094
ENSMUSG00000029103		ENSMUSG00000029103
ENSMUSG00000029110		ENSMUSG00000029110
ENSMUSG00000029119		ENSMUSG00000029119
ENSMUSG00000029125		ENSMUSG00000029125
ENSMUSG00000029128		ENSMUSG00000029128
ENSMUSG00000029130		ENSMUSG00000029130
ENSMUSG00000029131		ENSMUSG00000029131
ENSMUSG00000029134		ENSMUSG00000029134
ENSMUSG00000029138		ENSMUSG00000029138
ENSMUSG00000029141		ENSMUSG00000029141
ENSMUSG00000029145		ENSMUSG00000029145
ENSMUSG00000029147		ENSMUSG00000029147
ENSMUSG00000029148		ENSMUSG00000029148
ENSMUSG00000029155		ENSMUSG00000029155
ENSMUSG00000029165		ENSMUSG00000029165
ENSMUSG00000029166		ENSMUSG00000029166
ENSMUSG00000029169		ENSMUSG00000029169
ENSMUSG00000029174		ENSMUSG00000029174
ENSMUSG00000029176		ENSMUSG00000029176
ENSMUSG00000029186		ENSMUSG00000029186
ENSMUSG00000029191		ENSMUSG00000029191
ENSMUSG00000029192		ENSMUSG00000029192
ENSMUSG00000029196		ENSMUSG00000029196
ENSMUSG00000029201		ENSMUSG00000029201
ENSMUSG00000029202		ENSMUSG00000029202
ENSMUSG00000029203		ENSMUSG00000029203
ENSMUSG00000029206		ENSMUSG00000029206
ENSMUSG00000029212		ENSMUSG00000029212
ENSMUSG00000029223		ENSMUSG00000029223
ENSMUSG00000029227		ENSMUSG00000029227
ENSMUSG00000029229		ENSMUSG00000029229
ENSMUSG00000029235		ENSMUSG00000029235
ENSMUSG00000029238		ENSMUSG00000029238
ENSMUSG00000029249		ENSMUSG00000029249
ENSMUSG00000029250		ENSMUSG00000029250
ENSMUSG00000029267		ENSMUSG00000029267
ENSMUSG00000029276		ENSMUSG00000029276
ENSMUSG00000029279		ENSMUSG00000029279
ENSMUSG00000029290		ENSMUSG00000029290
ENSMUSG00000029291		ENSMUSG00000029291
ENSMUSG00000029309		ENSMUSG00000029309
ENSMUSG00000029310		ENSMUSG00000029310
ENSMUSG00000029314		ENSMUSG00000029314
ENSMUSG00000029320		ENSMUSG00000029320
ENSMUSG00000029328		ENSMUSG00000029328
ENSMUSG00000029345		ENSMUSG00000029345
ENSMUSG00000029381		ENSMUSG00000029381
ENSMUSG00000029389		ENSMUSG00000029389
ENSMUSG00000029390		ENSMUSG00000029390
ENSMUSG00000029402		ENSMUSG00000029402
ENSMUSG00000029403		ENSMUSG00000029403
ENSMUSG00000029404		ENSMUSG00000029404
ENSMUSG00000029406		ENSMUSG00000029406
ENSMUSG00000029415		ENSMUSG00000029415
ENSMUSG00000029422		ENSMUSG00000029422
ENSMUSG00000029423		ENSMUSG00000029423
ENSMUSG00000029427		ENSMUSG00000029427
ENSMUSG00000029428		ENSMUSG00000029428
ENSMUSG00000029430		ENSMUSG00000029430
ENSMUSG00000029433		ENSMUSG00000029433
ENSMUSG00000029439		ENSMUSG00000029439
ENSMUSG00000029440		ENSMUSG00000029440
ENSMUSG00000029442		ENSMUSG00000029442
ENSMUSG00000029447		ENSMUSG00000029447
ENSMUSG00000029458		ENSMUSG00000029458
ENSMUSG00000029463		ENSMUSG00000029463
ENSMUSG00000029467		ENSMUSG00000029467
ENSMUSG00000029469		ENSMUSG00000029469
ENSMUSG00000029472		ENSMUSG00000029472
ENSMUSG00000029474		ENSMUSG00000029474
ENSMUSG00000029475		ENSMUSG00000029475
ENSMUSG00000029477		ENSMUSG00000029477
ENSMUSG00000029478		ENSMUSG00000029478
ENSMUSG00000029502		ENSMUSG00000029502
ENSMUSG00000029505		ENSMUSG00000029505
ENSMUSG00000029516		ENSMUSG00000029516
ENSMUSG00000029528		ENSMUSG00000029528
ENSMUSG00000029538		ENSMUSG00000029538
ENSMUSG00000029544		ENSMUSG00000029544
ENSMUSG00000029547		ENSMUSG00000029547
ENSMUSG00000029552		ENSMUSG00000029552
ENSMUSG00000029554		ENSMUSG00000029554
ENSMUSG00000029564		ENSMUSG00000029564
ENSMUSG00000029576		ENSMUSG00000029576
ENSMUSG00000029580		ENSMUSG00000029580
ENSMUSG00000029594		ENSMUSG00000029594
ENSMUSG00000029598		ENSMUSG00000029598
ENSMUSG00000029599		ENSMUSG00000029599
ENSMUSG00000029601		ENSMUSG00000029601
ENSMUSG00000029616		ENSMUSG00000029616
ENSMUSG00000029617		ENSMUSG00000029617
ENSMUSG00000029623		ENSMUSG00000029623
ENSMUSG00000029629		ENSMUSG00000029629
ENSMUSG00000029634		ENSMUSG00000029634
ENSMUSG00000029635		ENSMUSG00000029635
ENSMUSG00000029640		ENSMUSG00000029640
ENSMUSG00000029642		ENSMUSG00000029642
ENSMUSG00000029647		ENSMUSG00000029647
ENSMUSG00000029655		ENSMUSG00000029655
ENSMUSG00000029670		ENSMUSG00000029670
ENSMUSG00000029686		ENSMUSG00000029686
ENSMUSG00000029687		ENSMUSG00000029687
ENSMUSG00000029701		ENSMUSG00000029701
ENSMUSG00000029705		ENSMUSG00000029705
ENSMUSG00000029708		ENSMUSG00000029708
ENSMUSG00000029714		ENSMUSG00000029714
ENSMUSG00000029718		ENSMUSG00000029718
ENSMUSG00000029720		ENSMUSG00000029720
ENSMUSG00000029729		ENSMUSG00000029729
ENSMUSG00000029730		ENSMUSG00000029730
ENSMUSG00000029752		ENSMUSG00000029752
ENSMUSG00000029761		ENSMUSG00000029761
ENSMUSG00000029767		ENSMUSG00000029767
ENSMUSG00000029769		ENSMUSG00000029769
ENSMUSG00000029772		ENSMUSG00000029772
ENSMUSG00000029784		ENSMUSG00000029784
ENSMUSG00000029817		ENSMUSG00000029817
ENSMUSG00000029823		ENSMUSG00000029823
ENSMUSG00000029828		ENSMUSG00000029828
ENSMUSG00000029833		ENSMUSG00000029833
ENSMUSG00000029848		ENSMUSG00000029848
ENSMUSG00000029875		ENSMUSG00000029875
ENSMUSG00000029883		ENSMUSG00000029883
ENSMUSG00000029909		ENSMUSG00000029909
ENSMUSG00000029917		ENSMUSG00000029917
ENSMUSG00000029920		ENSMUSG00000029920
ENSMUSG00000029922		ENSMUSG00000029922
ENSMUSG00000029992		ENSMUSG00000029992
ENSMUSG00000030007		ENSMUSG00000030007
ENSMUSG00000030016		ENSMUSG00000030016
ENSMUSG00000030030		ENSMUSG00000030030
ENSMUSG00000030034		ENSMUSG00000030034
ENSMUSG00000030041		ENSMUSG00000030041
ENSMUSG00000030051		ENSMUSG00000030051
ENSMUSG00000030056		ENSMUSG00000030056
ENSMUSG00000030059		ENSMUSG00000030059
ENSMUSG00000030062		ENSMUSG00000030062
ENSMUSG00000030077		ENSMUSG00000030077
ENSMUSG00000030122		ENSMUSG00000030122
ENSMUSG00000030125		ENSMUSG00000030125
ENSMUSG00000030126		ENSMUSG00000030126
ENSMUSG00000030127		ENSMUSG00000030127
ENSMUSG00000030137		ENSMUSG00000030137
ENSMUSG00000030138		ENSMUSG00000030138
ENSMUSG00000030161		ENSMUSG00000030161
ENSMUSG00000030172		ENSMUSG00000030172
ENSMUSG00000030177		ENSMUSG00000030177
ENSMUSG00000030180		ENSMUSG00000030180
ENSMUSG00000030189		ENSMUSG00000030189
ENSMUSG00000030200		ENSMUSG00000030200
ENSMUSG00000030204		ENSMUSG00000030204
ENSMUSG00000030206		ENSMUSG00000030206
ENSMUSG00000030213		ENSMUSG00000030213
ENSMUSG00000030216		ENSMUSG00000030216
ENSMUSG00000030224		ENSMUSG00000030224
ENSMUSG00000030228		ENSMUSG00000030228
ENSMUSG00000030230		ENSMUSG00000030230
ENSMUSG00000030231		ENSMUSG00000030231
ENSMUSG00000030232		ENSMUSG00000030232
ENSMUSG00000030243		ENSMUSG00000030243
ENSMUSG00000030254		ENSMUSG00000030254
ENSMUSG00000030257		ENSMUSG00000030257
ENSMUSG00000030265		ENSMUSG00000030265
ENSMUSG00000030275		ENSMUSG00000030275
ENSMUSG00000030276		ENSMUSG00000030276
ENSMUSG00000030287		ENSMUSG00000030287
ENSMUSG00000030292		ENSMUSG00000030292
ENSMUSG00000030301		ENSMUSG00000030301
ENSMUSG00000030304		ENSMUSG00000030304
ENSMUSG00000030314		ENSMUSG00000030314
ENSMUSG00000030321		ENSMUSG00000030321
ENSMUSG00000030323		ENSMUSG00000030323
ENSMUSG00000030335		ENSMUSG00000030335
ENSMUSG00000030344		ENSMUSG00000030344
ENSMUSG00000030346		ENSMUSG00000030346
ENSMUSG00000030357		ENSMUSG00000030357
ENSMUSG00000030374		ENSMUSG00000030374
ENSMUSG00000030397		ENSMUSG00000030397
ENSMUSG00000030403		ENSMUSG00000030403
ENSMUSG00000030417		ENSMUSG00000030417
ENSMUSG00000030421		ENSMUSG00000030421
ENSMUSG00000030435		ENSMUSG00000030435
ENSMUSG00000030451		ENSMUSG00000030451
ENSMUSG00000030465		ENSMUSG00000030465
ENSMUSG00000030491		ENSMUSG00000030491
ENSMUSG00000030498		ENSMUSG00000030498
ENSMUSG00000030510		ENSMUSG00000030510
ENSMUSG00000030515		ENSMUSG00000030515
ENSMUSG00000030516		ENSMUSG00000030516
ENSMUSG00000030521		ENSMUSG00000030521
ENSMUSG00000030528		ENSMUSG00000030528
ENSMUSG00000030534		ENSMUSG00000030534
ENSMUSG00000030536		ENSMUSG00000030536
ENSMUSG00000030555		ENSMUSG00000030555
ENSMUSG00000030557		ENSMUSG00000030557
ENSMUSG00000030595		ENSMUSG00000030595
ENSMUSG00000030603		ENSMUSG00000030603
ENSMUSG00000030617		ENSMUSG00000030617
ENSMUSG00000030619		ENSMUSG00000030619
ENSMUSG00000030638		ENSMUSG00000030638
ENSMUSG00000030649		ENSMUSG00000030649
ENSMUSG00000030655		ENSMUSG00000030655
ENSMUSG00000030659		ENSMUSG00000030659
ENSMUSG00000030662		ENSMUSG00000030662
ENSMUSG00000030663		ENSMUSG00000030663
ENSMUSG00000030671		ENSMUSG00000030671
ENSMUSG00000030680		ENSMUSG00000030680
ENSMUSG00000030688		ENSMUSG00000030688
ENSMUSG00000030695		ENSMUSG00000030695
ENSMUSG00000030718		ENSMUSG00000030718
ENSMUSG00000030726		ENSMUSG00000030726
ENSMUSG00000030727		ENSMUSG00000030727
ENSMUSG00000030737		ENSMUSG00000030737
ENSMUSG00000030738		ENSMUSG00000030738
ENSMUSG00000030761		ENSMUSG00000030761
ENSMUSG00000030768		ENSMUSG00000030768
ENSMUSG00000030779		ENSMUSG00000030779
ENSMUSG00000030788		ENSMUSG00000030788
ENSMUSG00000030792		ENSMUSG00000030792
ENSMUSG00000030795		ENSMUSG00000030795
ENSMUSG00000030801		ENSMUSG00000030801
ENSMUSG00000030805		ENSMUSG00000030805
ENSMUSG00000030811		ENSMUSG00000030811
ENSMUSG00000030815		ENSMUSG00000030815
ENSMUSG00000030816		ENSMUSG00000030816
ENSMUSG00000030824		ENSMUSG00000030824
ENSMUSG00000030846		ENSMUSG00000030846
ENSMUSG00000030849		ENSMUSG00000030849
ENSMUSG00000030850		ENSMUSG00000030850
ENSMUSG00000030851		ENSMUSG00000030851
ENSMUSG00000030877		ENSMUSG00000030877
ENSMUSG00000030878		ENSMUSG00000030878
ENSMUSG00000030882		ENSMUSG00000030882
ENSMUSG00000030887		ENSMUSG00000030887
ENSMUSG00000030889		ENSMUSG00000030889
ENSMUSG00000030924		ENSMUSG00000030924
ENSMUSG00000030942		ENSMUSG00000030942
ENSMUSG00000030965		ENSMUSG00000030965
ENSMUSG00000030967		ENSMUSG00000030967
ENSMUSG00000030968		ENSMUSG00000030968
ENSMUSG00000030978		ENSMUSG00000030978
ENSMUSG00000030980		ENSMUSG00000030980
ENSMUSG00000030983		ENSMUSG00000030983
ENSMUSG00000030987		ENSMUSG00000030987
ENSMUSG00000030994		ENSMUSG00000030994
ENSMUSG00000031004		ENSMUSG00000031004
ENSMUSG00000031010		ENSMUSG00000031010
ENSMUSG00000031015		ENSMUSG00000031015
ENSMUSG00000031027		ENSMUSG00000031027
ENSMUSG00000031028		ENSMUSG00000031028
ENSMUSG00000031068		ENSMUSG00000031068
ENSMUSG00000031075		ENSMUSG00000031075
ENSMUSG00000031078		ENSMUSG00000031078
ENSMUSG00000031139		ENSMUSG00000031139
ENSMUSG00000031153		ENSMUSG00000031153
ENSMUSG00000031161		ENSMUSG00000031161
ENSMUSG00000031174		ENSMUSG00000031174
ENSMUSG00000031196		ENSMUSG00000031196
ENSMUSG00000031226		ENSMUSG00000031226
ENSMUSG00000031229		ENSMUSG00000031229
ENSMUSG00000031233		ENSMUSG00000031233
ENSMUSG00000031245		ENSMUSG00000031245
ENSMUSG00000031256		ENSMUSG00000031256
ENSMUSG00000031292		ENSMUSG00000031292
ENSMUSG00000031303		ENSMUSG00000031303
ENSMUSG00000031311		ENSMUSG00000031311
ENSMUSG00000031314		ENSMUSG00000031314
ENSMUSG00000031333		ENSMUSG00000031333
ENSMUSG00000031351		ENSMUSG00000031351
ENSMUSG00000031353		ENSMUSG00000031353
ENSMUSG00000031370		ENSMUSG00000031370
ENSMUSG00000031371		ENSMUSG00000031371
ENSMUSG00000031446		ENSMUSG00000031446
ENSMUSG00000031451		ENSMUSG00000031451
ENSMUSG00000031452		ENSMUSG00000031452
ENSMUSG00000031483		ENSMUSG00000031483
ENSMUSG00000031485		ENSMUSG00000031485
ENSMUSG00000031493		ENSMUSG00000031493
ENSMUSG00000031502		ENSMUSG00000031502
ENSMUSG00000031503		ENSMUSG00000031503
ENSMUSG00000031509		ENSMUSG00000031509
ENSMUSG00000031511		ENSMUSG00000031511
ENSMUSG00000031518		ENSMUSG00000031518
ENSMUSG00000031529		ENSMUSG00000031529
ENSMUSG00000031533		ENSMUSG00000031533
ENSMUSG00000031536		ENSMUSG00000031536
ENSMUSG00000031540		ENSMUSG00000031540
ENSMUSG00000031545		ENSMUSG00000031545
ENSMUSG00000031552		ENSMUSG00000031552
ENSMUSG00000031553		ENSMUSG00000031553
ENSMUSG00000031554		ENSMUSG00000031554
ENSMUSG00000031559		ENSMUSG00000031559
ENSMUSG00000031563		ENSMUSG00000031563
ENSMUSG00000031575		ENSMUSG00000031575
ENSMUSG00000031578		ENSMUSG00000031578
ENSMUSG00000031585		ENSMUSG00000031585
ENSMUSG00000031590		ENSMUSG00000031590
ENSMUSG00000031592		ENSMUSG00000031592
ENSMUSG00000031601		ENSMUSG00000031601
ENSMUSG00000031617		ENSMUSG00000031617
ENSMUSG00000031620		ENSMUSG00000031620
ENSMUSG00000031622		ENSMUSG00000031622
ENSMUSG00000031629		ENSMUSG00000031629
ENSMUSG00000031631		ENSMUSG00000031631
ENSMUSG00000031644		ENSMUSG00000031644
ENSMUSG00000031647		ENSMUSG00000031647
ENSMUSG00000031651		ENSMUSG00000031651
ENSMUSG00000031660		ENSMUSG00000031660
ENSMUSG00000031666		ENSMUSG00000031666
ENSMUSG00000031682		ENSMUSG00000031682
ENSMUSG00000031683		ENSMUSG00000031683
ENSMUSG00000031691		ENSMUSG00000031691
ENSMUSG00000031696		ENSMUSG00000031696
ENSMUSG00000031697		ENSMUSG00000031697
ENSMUSG00000031701		ENSMUSG00000031701
ENSMUSG00000031711		ENSMUSG00000031711
ENSMUSG00000031715		ENSMUSG00000031715
ENSMUSG00000031727		ENSMUSG00000031727
ENSMUSG00000031728		ENSMUSG00000031728
ENSMUSG00000031729		ENSMUSG00000031729
ENSMUSG00000031731		ENSMUSG00000031731
ENSMUSG00000031756		ENSMUSG00000031756
ENSMUSG00000031774		ENSMUSG00000031774
ENSMUSG00000031776		ENSMUSG00000031776
ENSMUSG00000031786		ENSMUSG00000031786
ENSMUSG00000031788		ENSMUSG00000031788
ENSMUSG00000031796		ENSMUSG00000031796
ENSMUSG00000031805		ENSMUSG00000031805
ENSMUSG00000031809		ENSMUSG00000031809
ENSMUSG00000031820		ENSMUSG00000031820
ENSMUSG00000031831		ENSMUSG00000031831
ENSMUSG00000031839		ENSMUSG00000031839
ENSMUSG00000031843		ENSMUSG00000031843
ENSMUSG00000031845		ENSMUSG00000031845
ENSMUSG00000031847		ENSMUSG00000031847
ENSMUSG00000031849		ENSMUSG00000031849
ENSMUSG00000031851		ENSMUSG00000031851
ENSMUSG00000031864		ENSMUSG00000031864
ENSMUSG00000031865		ENSMUSG00000031865
ENSMUSG00000031878		ENSMUSG00000031878
ENSMUSG00000031893		ENSMUSG00000031893
ENSMUSG00000031898		ENSMUSG00000031898
ENSMUSG00000031913		ENSMUSG00000031913
ENSMUSG00000031922		ENSMUSG00000031922
ENSMUSG00000031927		ENSMUSG00000031927
ENSMUSG00000031928		ENSMUSG00000031928
ENSMUSG00000031930		ENSMUSG00000031930
ENSMUSG00000031939		ENSMUSG00000031939
ENSMUSG00000031954		ENSMUSG00000031954
ENSMUSG00000031960		ENSMUSG00000031960
ENSMUSG00000031971		ENSMUSG00000031971
ENSMUSG00000031979		ENSMUSG00000031979
ENSMUSG00000031984		ENSMUSG00000031984
ENSMUSG00000031986		ENSMUSG00000031986
ENSMUSG00000031991		ENSMUSG00000031991
ENSMUSG00000031996		ENSMUSG00000031996
ENSMUSG00000032002		ENSMUSG00000032002
ENSMUSG00000032006		ENSMUSG00000032006
ENSMUSG00000032009		ENSMUSG00000032009
ENSMUSG00000032010		ENSMUSG00000032010
ENSMUSG00000032023		ENSMUSG00000032023
ENSMUSG00000032030		ENSMUSG00000032030
ENSMUSG00000032050		ENSMUSG00000032050
ENSMUSG00000032058		ENSMUSG00000032058
ENSMUSG00000032064		ENSMUSG00000032064
ENSMUSG00000032076		ENSMUSG00000032076
ENSMUSG00000032078		ENSMUSG00000032078
[truncated: 2,824 more rows]
