# Supplementary material for: Splicing factor SRSF1 is essential for homing of precursor spermatogonial stem cells in mice
Source: eLife. 2024 Jan 25;12:RP89316. doi: 10.7554/eLife.89316 (PMC10945694; doi:10.7554/eLife.89316)
Supplement: Supplementary file 2. [file elife-89316-supp2.xls]

## Sheet: Sheet2
Supplementary File 2 Differentially expressed genes were analysed in this study.
gene id	cKO1	cKO2	cKO3	Control1	Control2	Control3	cKO	Ctrl	log2FoldChange	pvalue	padj	gene name	gene chr
ENSMUSG00000031780	271.848	308.517	478.909	59.1783	40.7661	72.6751	353.091	57.5399	2.62258	5.93e-23	1.07e-18	Ccl17	8
ENSMUSG00000063171	983.479	838.532	975.991	1941.66	2948.17	2342.53	932.667	2410.79	-1.37067	6.71e-19	6.07e-15	Rps4l	6
ENSMUSG00000031397	40.9346	83.0621	59.8636	287.729	628.839	283.732	61.2868	400.1	-2.70599	1.26e-18	7.59e-15	Tktl1	X
ENSMUSG00000020738	1406.47	1023.44	1269.96	2610.99	2830.21	2965.74	1233.29	2802.31	-1.18446	3.09e-18	1.4e-14	Sumo2	11
ENSMUSG00000082033	40.9346	58.3413	47.0357	216.307	588.073	229.972	48.7705	344.784	-2.82218	1.72e-17	6.21e-14	Mageb10-ps	X
ENSMUSG00000025480	30.4385	64.2743	52.3807	224.47	497.867	236.941	49.0312	319.759	-2.70495	2.41e-17	7.27e-14	Syce1	7
ENSMUSG00000041912	128.052	183.923	153.935	422.411	823.129	503.748	155.303	583.096	-1.90913	3.15e-16	7.35e-13	Tdrkh	3
ENSMUSG00000075511	53.5298	106.794	78.0365	305.074	467.51	282.736	79.4535	351.773	-2.1455	3.25e-16	7.35e-13	1700001L05Rik	15
ENSMUSG00000044595	114.407	86.0286	95.1404	295.892	520.419	322.558	98.5253	379.623	-1.94855	4.86e-16	8.65e-13	Dnd1	18
ENSMUSG00000021098	152.193	189.856	175.315	416.289	664.401	503.748	172.455	528.146	-1.61551	5.2e-16	8.65e-13	4930447C04Rik	12
ENSMUSG00000044303	52.4802	79.1068	55.5877	232.632	409.396	230.967	62.3916	290.999	-2.22124	5.26e-16	8.65e-13	Cdkn2a	4
ENSMUSG00000018379	4251.95	4365.71	4869.26	7745.22	8402.16	8339.72	4495.64	8162.37	-0.860539	1.47e-15	2.16e-12	Srsf1	11
ENSMUSG00000031765	424.04	587.368	654.224	1233.56	1995.81	1471.42	555.211	1566.93	-1.49733	1.55e-15	2.16e-12	Mt1	8
ENSMUSG00000051920	3.14881	9.88835	3.20698	78.5643	154.391	70.684	5.41471	101.213	-4.20991	2.53e-15	3.27e-12	Rspo2	15
ENSMUSG00000046774	40.9346	69.2185	54.5187	243.856	514.347	194.132	54.8906	317.445	-2.53211	3.55e-15	4.28e-12	8030474K03Rik	X
ENSMUSG00000031384	9.44644	19.7767	17.1039	86.7269	209.035	120.461	15.4423	138.741	-3.16715	5.28e-15	5.96e-12	Asb9	X
ENSMUSG00000108981	112.308	165.135	101.554	404.045	667.871	356.407	126.332	476.108	-1.91361	1.32e-14	1.4e-11	Gm15262	X
ENSMUSG00000073894	39.885	95.917	82.3125	278.546	510.01	267.803	72.7048	352.12	-2.2758	2.63e-14	2.64e-11	Rbmxl2	7
ENSMUSG00000028434	78.7203	108.772	109.037	283.648	546.44	303.643	98.8432	377.91	-1.93628	5.63e-14	5.36e-11	Epb41l4b	4
ENSMUSG00000046637	2.09921	18.7879	8.55195	71.4221	189.953	118.47	9.81301	126.615	-3.67906	6.35e-14	5.74e-11	Ttc34	4
ENSMUSG00000031430	64.0259	107.783	42.7597	297.932	435.417	234.95	71.5229	322.766	-2.17146	2.1e-13	1.81e-10	Vsig1	X
ENSMUSG00000068245	35.6865	34.6092	31.0008	160.19	229.852	113.493	33.7655	167.845	-2.31531	2.65e-13	2.18e-10	Phf11d	14
ENSMUSG00000033007	385.205	402.456	375.217	156.108	117.094	171.234	387.626	148.146	1.3911	3.25e-13	2.5e-10	Asic4	1
ENSMUSG00000084838	1450.55	1562.36	1406.8	682.591	843.946	606.29	1473.24	710.942	1.05018	3.31e-13	2.5e-10	Gm10241	16
ENSMUSG00000030041	26.2401	40.5422	37.4148	162.23	324.394	121.457	34.7324	202.694	-2.54631	3.7e-13	2.68e-10	M1ap	6
ENSMUSG00000074397	22.0417	26.6985	21.3799	122.438	294.037	88.6039	23.3734	168.359	-2.85004	1.5e-12	1.02e-09	Foxr1	9
ENSMUSG00000028610	5.24802	6.92185	7.48295	59.1783	148.319	56.7463	6.55094	88.0813	-3.75288	1.55e-12	1.02e-09	Dmrtb1	4
ENSMUSG00000028591	37.7858	58.3413	48.1047	456.081	1185.69	425.1	48.0772	688.956	-3.84075	1.57e-12	1.02e-09	Pramef12	4
ENSMUSG00000057836	44.0834	37.5757	36.3458	181.616	355.619	112.497	39.335	216.578	-2.46359	3e-12	1.87e-09	Xlr3a	X
ENSMUSG00000025519	15.7441	39.5534	35.2768	121.418	259.342	138.381	30.1914	173.047	-2.51912	3.85e-12	2.32e-09	Tktl2	8
ENSMUSG00000079536	11.5456	30.6539	27.7938	106.113	238.525	114.488	23.3311	153.042	-2.71384	4.27e-12	2.49e-09	Gm6880	X
ENSMUSG00000058328	12.5953	32.6316	26.7248	121.418	264.546	99.5549	23.9839	161.84	-2.75414	6.11e-12	3.45e-09	Xlr5a	X
ENSMUSG00000054889	974.033	1060.03	892.609	480.569	405.927	545.561	975.558	477.352	1.03256	7.04e-12	3.85e-09	Dsp	13
ENSMUSG00000007888	35.6865	63.2854	60.9326	169.372	203.831	190.15	53.3015	187.784	-1.81626	1.18e-11	6.27e-09	Crlf1	8
ENSMUSG00000072249	0	2.96651	6.41396	42.8533	107.553	52.7641	3.12682	67.7235	-4.44784	3.51e-11	1.77e-08	Fthl17f	X
ENSMUSG00000006310	15.7441	32.6316	21.3799	120.397	217.709	83.6261	23.2518	140.577	-2.59452	3.53e-11	1.77e-08	Zbtb32	7
ENSMUSG00000010796	102.861	168.102	103.692	309.156	706.035	347.447	124.885	454.212	-1.86275	4.08e-11	1.98e-08	Asz1	6
ENSMUSG00000022487	46.1826	73.1738	47.0357	211.205	357.354	143.359	55.464	237.306	-2.09679	4.22e-11	1.98e-08	Gtsf1	15
ENSMUSG00000063804	26.2401	39.5534	39.5528	123.458	269.75	122.453	35.1154	171.887	-2.29352	4.26e-11	1.98e-08	Lin28b	10
ENSMUSG00000010651	17.8433	16.8102	24.5868	91.8284	176.942	80.6395	19.7468	116.47	-2.56619	5.35e-11	2.42e-08	Acaa1b	9
ENSMUSG00000056436	15.7441	45.4864	28.8628	113.255	188.218	142.364	30.0311	147.946	-2.29729	5.87e-11	2.59e-08	Cyct	2
ENSMUSG00000073130	11.5456	13.8437	10.6899	63.2596	148.319	67.6974	12.0264	93.0921	-2.95395	6.4e-11	2.75e-08	Gm1141	X
ENSMUSG00000044576	15.7441	42.5199	23.5179	106.113	216.841	123.448	27.2606	148.801	-2.44544	7.37e-11	3.1e-08	Garem2	5
ENSMUSG00000096883	450.28	516.172	315.353	1091.74	954.968	834.27	427.268	960.326	-1.16746	8.25e-11	3.39e-08	Shisa8	15
ENSMUSG00000039431	87.1172	87.0175	117.589	253.038	402.457	232.959	97.2413	296.151	-1.60974	9.73e-11	3.91e-08	Mtmr7	8
ENSMUSG00000055403	28.3393	37.5757	21.3799	112.235	312.251	100.55	29.0983	175.012	-2.58854	1.14e-10	4.49e-08	4933427D06Rik	6
ENSMUSG00000039209	76.6211	142.392	111.175	290.79	642.717	278.754	110.063	404.087	-1.87683	2.21e-10	8.5e-08	Rpl39l	16
ENSMUSG00000071341	112.308	234.354	248.006	554.032	780.628	458.948	198.223	597.869	-1.59314	2.56e-10	9.62e-08	Egr4	6
ENSMUSG00000016626	3.14881	1.97767	4.27597	57.1377	127.503	22.8976	3.13415	69.1793	-4.47687	2.71e-10	1e-07	Nlrp14	7
ENSMUSG00000027315	46.1826	88.9952	62.0016	192.84	361.691	184.177	65.7265	246.236	-1.90532	2.99e-10	1.08e-07	Spint1	2
ENSMUSG00000022763	18.8929	45.4864	44.8977	118.357	294.037	140.372	36.4257	184.255	-2.33993	3.16e-10	1.12e-07	Aifm3	16
ENSMUSG00000083411	231.963	382.679	271.524	54.0767	91.0733	123.448	295.389	89.5327	1.72166	3.63e-10	1.26e-07	Rpl30-ps10	X
ENSMUSG00000041324	3994.79	3565.74	3652.75	2140.62	2315.86	2439.1	3737.76	2298.53	0.70137	4.63e-10	1.58e-07	Inhba	13
ENSMUSG00000067768	8.39683	20.7655	12.8279	75.5034	164.799	62.7196	13.9968	101.007	-2.84894	4.85e-10	1.63e-07	Xlr4b	X
ENSMUSG00000034690	99.7124	159.202	128.279	561.174	1236.86	625.205	129.065	807.747	-2.64577	5.5e-10	1.81e-07	Nlrp4c	7
ENSMUSG00000115483	16.7937	24.7209	19.2419	92.8488	122.298	76.6573	20.2521	97.2682	-2.26318	6.88e-10	2.22e-07	Gm9732	14
ENSMUSG00000005251	32.5377	35.5981	49.1737	136.722	322.66	106.524	39.1032	188.635	-2.27425	7.98e-10	2.53e-07	Ripk4	16
ENSMUSG00000020059	22.0417	44.4976	27.7938	97.9503	338.272	114.488	31.4444	183.57	-2.54524	8.87e-10	2.76e-07	Sycp3	10
ENSMUSG00000053398	2543.19	2837.96	2689.59	4387.36	4662.08	3991.16	2690.24	4346.87	-0.692284	9.13e-10	2.8e-07	Phgdh	3
ENSMUSG00000073460	93.4148	115.694	98.3474	278.546	497.867	210.061	102.485	328.825	-1.6832	9.95e-10	3e-07	Pnldc1	17
ENSMUSG00000025038	4.19842	25.7097	18.1729	76.5237	147.452	92.5861	16.027	105.521	-2.71522	1.47e-09	4.31e-07	Efhc2	X
ENSMUSG00000072944	106.01	152.281	119.727	253.038	623.635	330.522	126.006	402.399	-1.67605	1.48e-09	4.31e-07	Nup62cl	X
ENSMUSG00000049387	17.8433	24.7209	22.4489	70.4018	189.953	91.5905	21.671	117.315	-2.43901	1.51e-09	4.34e-07	Cox7b2	5
ENSMUSG00000009248	3.14881	6.92185	11.7589	40.8126	114.492	58.7374	7.27653	71.3474	-3.3009	1.77e-09	5e-07	Ascl2	7
ENSMUSG00000062170	12.5953	15.8214	17.1039	65.3002	119.696	69.6885	15.1735	84.895	-2.48756	1.83e-09	5.09e-07	Fmr1nb	X
ENSMUSG00000034555	5.24802	17.799	20.3109	63.2596	170.871	76.6573	14.4526	103.596	-2.84375	1.86e-09	5.1e-07	Tex16	X
ENSMUSG00000046167	217.268	196.778	268.317	58.158	53.7766	107.519	227.455	73.1513	1.63946	2.04e-09	5.52e-07	Gldn	9
ENSMUSG00000045179	9.44644	25.7097	7.48295	176.515	489.194	189.154	14.213	284.954	-4.32115	2.27e-09	6.02e-07	Sox3	X
ENSMUSG00000024406	37.7858	48.4529	66.2776	186.718	315.721	114.488	50.8388	205.642	-2.01928	2.35e-09	6.15e-07	Pou5f1	17
ENSMUSG00000072437	39.885	41.5311	47.0357	121.418	261.077	121.457	42.8172	167.984	-1.97573	2.39e-09	6.18e-07	Nanos1	19
ENSMUSG00000028089	416.693	425.199	363.458	666.266	838.742	740.689	401.783	748.566	-0.898073	2.95e-09	7.47e-07	Chd1l	3
ENSMUSG00000079387	3.14881	15.8214	9.62094	56.1174	131.839	55.7508	9.53037	81.2359	-3.08671	2.98e-09	7.47e-07	Luzp4	X
ENSMUSG00000037910	12.5953	41.5311	36.3458	102.032	220.311	122.453	30.1574	148.265	-2.2975	3.23e-09	8e-07	1700018B24Rik	3
ENSMUSG00000045394	215.169	309.505	366.665	668.307	754.607	556.512	297.113	659.809	-1.15165	3.39e-09	8.28e-07	Epcam	17
ENSMUSG00000026709	370.51	368.835	363.458	644.84	753.74	618.236	367.601	672.272	-0.871656	4.01e-09	9.66e-07	Dars2	1
ENSMUSG00000036832	5.24802	24.7209	21.3799	76.5237	117.962	95.5727	17.1163	96.686	-2.49546	4.38e-09	1.04e-06	Lpar3	3
ENSMUSG00000109561	29.3889	71.1961	56.6566	168.352	294.037	142.364	52.4139	201.584	-1.9433	4.47e-09	1.05e-06	Ankrd31	13
ENSMUSG00000034645	19.9425	35.5981	18.1729	128.56	142.248	70.684	24.5711	113.831	-2.20798	5.29e-09	1.22e-06	Zyg11a	4
ENSMUSG00000038305	1852.55	1749.25	1892.12	1117.25	1108.49	1213.57	1831.31	1146.44	0.675778	5.33e-09	1.22e-06	Spats2l	1
ENSMUSG00000060985	123.853	148.325	110.106	302.014	636.646	255.856	127.428	398.172	-1.64475	5.47e-09	1.24e-06	Tdrd5	1
ENSMUSG00000037605	362.113	305.55	311.077	140.804	160.462	162.275	326.247	154.514	1.0772	6.55e-09	1.46e-06	Adgrl3	5
ENSMUSG00000040612	176.334	159.202	169.97	315.278	477.918	340.478	168.502	377.891	-1.16729	7.2e-09	1.59e-06	Ildr2	1
ENSMUSG00000028698	243.508	197.767	171.039	446.898	861.293	382.291	204.105	563.494	-1.46642	7.35e-09	1.6e-06	Pik3r3	4
ENSMUSG00000042498	35.6865	37.5757	36.3458	90.8081	299.241	117.475	36.536	169.175	-2.21421	7.88e-09	1.7e-06	D330045A20Rik	X
ENSMUSG00000090470	2.09921	5.93301	6.41396	34.6907	84.1344	43.8042	4.81539	54.2098	-3.49482	9.03e-09	1.92e-06	Prr23a3	9
ENSMUSG00000022949	25.1905	13.8437	18.1729	62.2393	235.056	70.684	19.069	122.66	-2.69127	1.11e-08	2.32e-06	Clic6	16
ENSMUSG00000040649	115.456	121.627	129.348	246.916	575.93	267.803	122.144	363.55	-1.57577	1.17e-08	2.43e-06	Rimklb	6
ENSMUSG00000079584	38.8354	92.9505	37.4148	176.515	317.455	159.288	56.4002	217.753	-1.94646	1.46e-08	3e-06	Gm364	X
ENSMUSG00000058897	638.159	552.759	535.566	314.257	232.454	329.527	575.495	292.079	0.980483	1.52e-08	3.08e-06	Col25a1	3
ENSMUSG00000024805	298.088	370.813	338.871	557.093	1110.23	669.009	335.924	778.776	-1.21399	1.75e-08	3.49e-06	Pcgf5	19
ENSMUSG00000039639	322.229	282.807	403.01	139.783	113.625	178.203	336.015	143.87	1.22564	1.76e-08	3.49e-06	Kcne1	16
ENSMUSG00000049493	32.5377	38.5646	32.0698	89.7878	218.576	107.519	34.3907	138.628	-2.01351	1.8e-08	3.53e-06	Pls1	9
ENSMUSG00000078206	0	7.91068	4.27597	43.8736	83.267	33.8487	4.06222	53.6631	-3.71146	1.96e-08	3.82e-06	Fthl17d	X
ENSMUSG00000112858	9.44644	11.866	10.6899	51.0158	102.349	49.7775	10.6675	67.7141	-2.66888	2.22e-08	4.26e-06	Rnf212b	14
ENSMUSG00000055780	55.629	138.437	73.7605	474.447	882.11	455.962	89.2755	604.173	-2.75783	2.53e-08	4.82e-06	Usp26	X
ENSMUSG00000036766	136.449	191.834	161.418	320.379	326.996	399.215	163.234	348.864	-1.09432	2.59e-08	4.88e-06	Dner	1
ENSMUSG00000036304	37.7858	72.185	29.9318	151.007	307.914	117.475	46.6342	192.132	-2.04106	3.05e-08	5.58e-06	Zdhhc23	16
ENSMUSG00000031383	157.441	203.7	149.659	322.42	545.572	343.465	170.267	403.819	-1.24658	3.05e-08	5.58e-06	Dusp9	X
ENSMUSG00000016239	376.808	471.674	280.076	700.957	1359.16	718.787	376.186	926.301	-1.30027	3.06e-08	5.58e-06	Lonrf3	X
ENSMUSG00000095872	0	4.94418	6.41396	26.5282	104.084	38.8264	3.78605	56.4795	-3.90192	3.14e-08	5.67e-06	Gm15128	X
ENSMUSG00000037625	714.781	1069.92	751.502	2179.39	1395.59	1553.06	845.401	1709.35	-1.01496	3.44e-08	6.15e-06	Cldn11	3
ENSMUSG00000109860	60.877	68.2296	62.0016	144.885	366.895	151.323	63.7028	221.035	-1.79727	3.47e-08	6.15e-06	Gm17737	7
ENSMUSG00000070348	176.334	248.198	234.11	425.472	477.051	410.166	219.547	437.563	-0.994977	3.7e-08	6.49e-06	Ccnd1	7
ENSMUSG00000039224	48.2818	78.118	39.5528	124.479	285.363	169.243	55.3175	193.028	-1.80233	4.27e-08	7.43e-06	D1Pas1	1
ENSMUSG00000041020	65.0755	93.9393	72.6915	181.616	360.824	166.257	77.2354	236.232	-1.6141	5.33e-08	9.18e-06	Map7d2	X
ENSMUSG00000025977	18.8929	32.6316	18.1729	79.5846	197.759	69.6885	23.2324	115.677	-2.31552	5.39e-08	9.19e-06	Boll	1
ENSMUSG00000073125	66.1251	51.4194	85.5195	241.815	194.29	140.372	67.688	192.159	-1.50741	5.56e-08	9.39e-06	Xlr3b	X
ENSMUSG00000037979	31.4881	30.6539	42.7597	99.991	196.024	93.5816	34.9672	129.866	-1.89798	6.05e-08	1.01e-05	Ccdc92	5
ENSMUSG00000008489	129.101	162.169	104.761	239.774	439.754	308.62	132.011	329.383	-1.31947	6.43e-08	1.07e-05	Elavl2	4
ENSMUSG00000040434	122.804	179.968	194.557	305.074	470.112	360.389	165.776	378.525	-1.19238	6.53e-08	1.07e-05	Large2	2
ENSMUSG00000035427	78.7203	87.0175	67.3466	369.354	1034.77	348.442	77.6948	584.188	-2.91069	7.22e-08	1.18e-05	Mageb4	X
ENSMUSG00000078249	15.7441	36.5869	24.5868	81.6253	139.646	90.595	25.6393	103.955	-2.01789	7.55e-08	1.22e-05	Hmga1b	11
ENSMUSG00000024640	1387.58	1322.07	1483.76	2285.51	2220.45	1997.07	1397.8	2167.68	-0.63318	8.32e-08	1.33e-05	Psat1	19
ENSMUSG00000045662	6.29763	13.8437	8.55195	36.7314	131.839	48.7819	9.56442	72.4509	-2.92026	8.54e-08	1.34e-05	Henmt1	3
ENSMUSG00000027722	651.804	929.505	775.02	1202.95	2441.63	1479.39	785.443	1707.99	-1.12107	8.56e-08	1.34e-05	Spata5	3
ENSMUSG00000097599	0	2.96651	1.06899	29.5892	60.7155	27.8754	1.34517	39.3934	-4.84755	8.9e-08	1.39e-05	Gm26678	3
ENSMUSG00000009108	28.3393	50.4306	43.8287	93.8691	169.136	141.368	40.8662	134.791	-1.72211	9.63e-08	1.49e-05	Gnat2	3
ENSMUSG00000034640	450.28	449.92	399.804	636.677	919.406	811.373	433.335	789.152	-0.865465	9.86e-08	1.51e-05	Tiparp	3
ENSMUSG00000067360	11.5456	44.4976	31.0008	93.8691	212.504	98.5594	29.0147	134.978	-2.21676	1.02e-07	1.54e-05	Pramel3	X
ENSMUSG00000006362	992.926	1027.4	1036.92	600.966	462.305	675.978	1019.08	579.75	0.81507	1.11e-07	1.67e-05	Cbfa2t3	8
ENSMUSG00000070802	653.903	705.039	814.573	432.614	365.161	442.024	724.505	413.266	0.810849	1.18e-07	1.77e-05	Pnmal2	7
ENSMUSG00000073177	19.9425	30.6539	31.0008	92.8488	182.147	68.6929	27.1991	114.563	-2.07729	1.23e-07	1.83e-05	Gm773	X
ENSMUSG00000031842	23.0913	19.7767	22.4489	64.2799	126.635	75.6617	21.7723	88.859	-2.03386	1.37e-07	2.01e-05	Pde4c	8
ENSMUSG00000039187	226.715	222.488	195.626	394.862	470.112	364.371	214.943	409.782	-0.931633	1.4e-07	2.04e-05	Fanci	7
ENSMUSG00000038028	167.937	150.303	156.073	260.181	373.834	344.46	158.104	326.158	-1.04629	1.46e-07	2.12e-05	Tigar	6
ENSMUSG00000074269	19.9425	27.6874	32.0698	73.4627	165.667	83.6261	26.5666	107.585	-2.02176	1.5e-07	2.16e-05	Rec114	9
ENSMUSG00000028278	286.542	406.411	316.422	612.19	995.735	564.476	336.458	724.134	-1.10634	1.55e-07	2.21e-05	Rragd	4
ENSMUSG00000028626	1116.78	1246.92	1593.87	819.314	725.117	751.64	1319.19	765.357	0.785604	1.76e-07	2.48e-05	Col9a2	4
ENSMUSG00000036111	44.0834	17.799	21.3799	105.093	185.616	71.6796	27.7541	120.796	-2.1268	1.86e-07	2.6e-05	Lmo1	7
ENSMUSG00000009670	66.1251	126.571	79.1055	405.065	983.591	400.211	90.6005	596.289	-2.7181	1.95e-07	2.71e-05	Tex11	X
ENSMUSG00000041359	43.0338	75.1515	29.9318	217.327	208.168	99.5549	49.3724	175.017	-1.82236	1.98e-07	2.73e-05	Tcl1	12
ENSMUSG00000015365	101.812	185.901	107.968	644.84	1450.23	537.597	131.894	877.557	-2.73386	2.09e-07	2.86e-05	Mov10l1	15
ENSMUSG00000028587	172.135	160.191	204.178	356.09	490.928	297.669	178.835	381.563	-1.09559	2.41e-07	3.27e-05	Orc1	4
ENSMUSG00000051176	7.34723	13.8437	8.55195	54.0767	71.1239	43.8042	9.91429	56.3349	-2.50268	2.46e-07	3.31e-05	Zfp42	8
ENSMUSG00000056155	33.5873	27.6874	25.6558	80.605	168.269	79.6439	28.9769	109.506	-1.92194	2.49e-07	3.33e-05	Nanos3	8
ENSMUSG00000037224	857.527	698.118	602.912	429.553	404.192	372.335	719.519	402.027	0.839848	2.53e-07	3.36e-05	Zfyve28	5
ENSMUSG00000054321	220.417	260.064	188.143	392.822	680.014	401.206	222.874	491.347	-1.1413	2.59e-07	3.42e-05	Taf4b	18
ENSMUSG00000072479	24.1409	24.7209	25.6558	55.0971	124.033	109.51	24.8392	96.2135	-1.95647	2.63e-07	3.45e-05	Xlr5b	X
ENSMUSG00000079033	20.9921	29.6651	38.4838	64.2799	182.147	110.506	29.7136	118.977	-2.00557	2.87e-07	3.72e-05	Mef2b	8
ENSMUSG00000071815	5.24802	15.8214	14.9659	49.9955	107.553	50.773	12.0118	69.4406	-2.53237	2.88e-07	3.72e-05	Fthl17e	X
ENSMUSG00000025090	9.44644	38.5646	35.2768	78.5643	184.749	107.519	27.7626	123.611	-2.15482	3.47e-07	4.44e-05	Ccdc172	19
ENSMUSG00000062542	98.6628	178.979	87.6575	320.379	353.885	238.932	121.766	304.399	-1.3199	3.74e-07	4.76e-05	Syt9	7
ENSMUSG00000026398	27.2897	24.7209	49.1737	153.047	83.267	114.488	33.7281	116.934	-1.79489	3.8e-07	4.8e-05	Nr5a2	1
ENSMUSG00000091490	2.09921	13.8437	11.7589	70.4018	60.7155	43.8042	9.23394	58.3072	-2.65326	4e-07	4.99e-05	Triml2	8
ENSMUSG00000031162	90.266	84.051	80.1745	186.718	209.902	170.239	84.8305	188.953	-1.1564	4.03e-07	4.99e-05	Gata1	X
ENSMUSG00000096520	11.5456	17.799	12.8279	47.9549	125.768	50.773	14.0575	74.8319	-2.41377	4.06e-07	4.99e-05	Gm3376	Y
ENSMUSG00000079432	7.34723	20.7655	7.48295	60.1986	91.0733	47.7864	11.8652	66.3528	-2.47584	4.06e-07	4.99e-05	Gm15023	X
ENSMUSG00000046999	456.578	345.103	383.769	218.348	130.972	213.048	395.15	187.456	1.07883	4.12e-07	5.03e-05	1110032F04Rik	3
ENSMUSG00000046000	3.14881	4.94418	2.13799	26.5282	58.9808	30.862	3.41032	38.7903	-3.50212	4.15e-07	5.04e-05	Naa11	5
ENSMUSG00000040957	1073.75	941.371	1157.72	547.91	456.234	734.715	1057.61	579.62	0.868448	4.34e-07	5.23e-05	Cables1	18
ENSMUSG00000031558	1288.91	1220.22	1311.65	777.481	693.892	904.954	1273.6	792.109	0.685746	4.49e-07	5.38e-05	Slit2	5
ENSMUSG00000070529	784.054	1014.54	894.747	1558.02	1313.19	1494.32	897.782	1455.18	-0.696102	4.68e-07	5.56e-05	Wfdc10	2
ENSMUSG00000046337	26.2401	21.7544	32.0698	72.4424	154.391	76.6573	26.6881	101.164	-1.92858	4.89e-07	5.78e-05	Fam178b	1
ENSMUSG00000029223	813.443	763.381	765.399	1888.6	3846.76	2079.7	780.741	2605.02	-1.73853	4.94e-07	5.79e-05	Uchl1	5
ENSMUSG00000036181	910.007	719.872	912.92	554.032	452.764	489.81	847.6	498.869	0.76518	5.04e-07	5.88e-05	Hist1h1c	13
ENSMUSG00000043549	10.496	15.8214	18.1729	38.772	189.953	51.7686	14.8301	93.4978	-2.6608	5.17e-07	5.99e-05	Fam90a1b	X
ENSMUSG00000064194	9.44644	17.799	31.0008	62.2393	168.269	64.7107	19.4154	98.4062	-2.34742	5.29e-07	6.09e-05	Zfp936	7
ENSMUSG00000026110	144.845	126.571	137.9	293.851	298.373	230.967	136.439	274.397	-1.00915	5.37e-07	6.15e-05	Mgat4a	1
ENSMUSG00000046942	5.24802	10.8772	11.7589	53.0564	84.1344	33.8487	9.29471	57.0132	-2.61919	5.53e-07	6.29e-05	Mageb16	X
ENSMUSG00000028345	1222.79	1371.51	1175.89	1845.75	2562.2	1868.65	1256.73	2092.2	-0.735649	6.13e-07	6.93e-05	Tex10	4
ENSMUSG00000027577	22.0417	50.4306	67.3466	154.068	142.248	137.386	46.6063	144.567	-1.63339	6.18e-07	6.93e-05	Chrna4	2
ENSMUSG00000037572	856.477	870.175	835.953	1345.8	1986.26	1229.5	854.202	1520.52	-0.832546	6.44e-07	7.18e-05	Wdhd1	14
ENSMUSG00000034220	3063.79	2383.09	2752.66	1714.13	1473.65	1912.45	2733.18	1700.08	0.685233	6.63e-07	7.35e-05	Gpc1	1
ENSMUSG00000020396	17.8433	43.5087	27.7938	83.6659	176.075	84.6217	29.7153	114.788	-1.94906	7.17e-07	7.9e-05	Nefh	11
ENSMUSG00000021257	147.994	150.303	138.969	271.404	302.71	262.825	145.755	278.98	-0.937113	7.51e-07	8.18e-05	Angel1	12
ENSMUSG00000038080	344.27	301.595	287.559	538.727	817.925	480.85	311.141	612.501	-0.978487	7.51e-07	8.18e-05	Kdm1b	13
ENSMUSG00000002324	23.0913	12.8549	23.5179	78.5643	132.707	48.7819	19.8213	86.6843	-2.13606	8.13e-07	8.79e-05	Rec8	14
ENSMUSG00000072244	173.185	311.483	204.178	428.533	559.45	441.028	229.615	476.337	-1.05209	8.17e-07	8.79e-05	Trim6	7
ENSMUSG00000049164	1006.57	1160.89	910.782	1543.74	2595.15	1592.88	1026.08	1910.59	-0.897215	8.47e-07	9.06e-05	Zfp518a	19
ENSMUSG00000071470	19.9425	31.6427	28.8628	74.4831	152.656	72.6751	26.816	99.9381	-1.90036	8.82e-07	9.37e-05	Ccnb1ip1	14
ENSMUSG00000053046	11.5456	37.5757	21.3799	65.3002	144.85	87.6083	23.5004	99.2528	-2.07599	9.75e-07	0.000102696	Brsk2	7
ENSMUSG00000078932	17.8433	34.6092	25.6558	80.605	201.229	59.733	26.0361	113.856	-2.12983	9.77e-07	0.000102696	CN725425	15
ENSMUSG00000017724	141.697	183.923	197.764	326.501	322.66	344.46	174.461	331.207	-0.924571	9.88e-07	0.000103259	Etv4	11
ENSMUSG00000026024	467.074	463.764	383.769	739.729	951.499	645.116	438.202	778.781	-0.830224	1.03e-06	0.000107011	Als2	1
ENSMUSG00000108801	300.187	202.711	225.558	121.418	85.8691	122.453	242.819	109.913	1.14629	1.05e-06	0.000108707	Gm39090	7
ENSMUSG00000073000	17.8433	10.8772	25.6558	85.7065	98.8796	47.7864	18.1254	77.4575	-2.10278	1.07e-06	0.000109967	Gm10451	12
ENSMUSG00000032261	566.786	505.295	422.252	778.501	1018.29	785.488	498.111	860.759	-0.789727	1.28e-06	0.000130481	Sh3bgrl2	9
ENSMUSG00000018830	2375.25	2286.19	2456.55	4392.46	3341.09	3332.1	2372.66	3688.55	-0.636417	1.32e-06	0.000134208	Myh11	16
ENSMUSG00000043099	1859.9	1924.27	2271.61	1374.37	1230.79	1364.9	2018.59	1323.35	0.609357	1.34e-06	0.00013492	Hic1	11
ENSMUSG00000067702	252.955	706.028	475.702	2000.84	4418.36	2350.49	478.228	2923.23	-2.61171	1.43e-06	0.000143544	Tuba3a	6
ENSMUSG00000073243	1.0496	3.95534	2.13799	20.4063	50.3071	28.8709	2.38098	33.1948	-3.79258	1.44e-06	0.000144074	Gm9	X
ENSMUSG00000096966	23.0913	58.3413	56.6566	114.275	265.414	109.51	46.0297	163.066	-1.82642	1.55e-06	0.000153794	Gm18336	X
ENSMUSG00000011589	77.6707	76.1403	66.2776	154.068	343.476	135.395	73.3629	210.98	-1.52655	1.56e-06	0.000154405	Fsd1	17
ENSMUSG00000080069	14.6945	22.7432	34.2078	166.312	454.499	113.493	23.8818	244.768	-3.35872	1.68e-06	0.00016524	Gm41	X
ENSMUSG00000079105	319.08	364.88	195.626	127.539	122.298	150.328	293.195	133.389	1.13795	1.69e-06	0.00016524	C7	15
ENSMUSG00000032939	1045.41	879.074	952.473	1605.98	1810.19	1278.29	958.984	1564.82	-0.706956	1.75e-06	0.000168972	Nup93	8
ENSMUSG00000031458	198.375	193.812	222.351	306.095	556.848	388.264	204.846	417.069	-1.02787	1.75e-06	0.000168972	Coprs	8
ENSMUSG00000036752	4249.85	4214.41	5727.67	6668.79	9568.77	7460.65	4730.64	7899.4	-0.739879	1.76e-06	0.000168972	Tubb4b	2
ENSMUSG00000078498	23.0913	60.3189	50.2427	116.316	249.801	101.546	44.551	155.888	-1.80785	1.78e-06	0.000170638	Zfp988	4
ENSMUSG00000066687	53.5298	122.616	55.5877	309.156	608.89	316.585	77.2443	411.543	-2.41265	2.14e-06	0.000203437	Zbtb16	9
ENSMUSG00000072923	7.34723	13.8437	5.34497	145.905	283.628	39.822	8.8453	156.452	-4.14155	2.15e-06	0.000203437	Gm10439	X
ENSMUSG00000070732	32.5377	85.0398	48.1047	259.16	600.216	244.905	55.2274	368.094	-2.73588	2.31e-06	0.000217096	Rbm44	1
ENSMUSG00000046709	81.8691	96.9058	72.6915	146.925	259.342	185.172	83.8222	197.147	-1.23506	2.46e-06	0.000230844	Mapk10	5
ENSMUSG00000061911	9.44644	25.7097	19.2419	67.3409	122.298	48.7819	18.1327	79.4737	-2.1316	2.74e-06	0.000255372	Myt1l	12
ENSMUSG00000002076	14.6945	35.5981	18.1729	67.3409	103.216	78.6484	22.8218	83.0685	-1.8599	2.95e-06	0.00027362	Hsf2bp	17
ENSMUSG00000024647	78.7203	71.1961	66.2776	125.499	202.963	175.217	72.0647	167.893	-1.22219	2.97e-06	0.000273926	Cbln2	18
ENSMUSG00000039109	200.474	155.247	190.281	333.643	334.803	316.585	182.001	328.344	-0.852428	3.05e-06	0.000277075	F13a1	13
ENSMUSG00000038299	1139.87	1242.97	1204.76	1620.26	2123.31	1767.1	1195.86	1836.89	-0.619621	3.05e-06	0.000277075	Wdr36	18
ENSMUSG00000038508	596.175	431.132	576.187	270.384	248.066	355.411	534.498	291.287	0.876363	3.06e-06	0.000277075	Gdf15	8
ENSMUSG00000026893	546.844	656.586	409.424	995.828	848.283	947.763	537.618	930.625	-0.790517	3.07e-06	0.000277075	Gca	2
ENSMUSG00000042195	342.171	377.735	242.661	547.91	671.34	529.632	320.856	582.961	-0.861285	3.11e-06	0.00027929	Slc35f2	9
ENSMUSG00000045330	441.883	880.063	683.087	1130.51	1344.42	1270.32	668.344	1248.42	-0.901116	3.27e-06	0.000292885	4933402E13Rik	X
ENSMUSG00000033948	55.629	51.4194	42.7597	96.93	287.965	107.519	49.9361	164.138	-1.71977	3.32e-06	0.000295723	Zswim5	4
ENSMUSG00000035395	38.8354	33.6204	39.5528	88.7675	165.667	83.6261	37.3362	112.687	-1.59836	3.36e-06	0.000298096	Pet2	X
ENSMUSG00000060176	30.4385	35.5981	28.8628	80.605	153.524	72.6751	31.6331	102.268	-1.6954	3.51e-06	0.000309344	Kif27	13
ENSMUSG00000025757	306.484	389.601	302.525	529.544	780.628	520.672	332.87	610.281	-0.875085	3.82e-06	0.000335123	Hspa4l	3
ENSMUSG00000025001	1780.13	2253.56	2187.16	2814.03	5113.11	3238.52	2073.61	3721.89	-0.844138	3.85e-06	0.000336611	Hells	19
ENSMUSG00000060461	15.7441	14.8325	11.7589	39.7923	79.7975	59.733	14.1118	59.7743	-2.08488	3.96e-06	0.000343224	Dppa5a	9
ENSMUSG00000071562	34.6369	35.5981	21.3799	5.10158	2.60209	0	30.5383	2.56789	3.57951	3.97e-06	0.000343224	Stfa1	16
ENSMUSG00000094004	5.24802	7.91068	6.41396	18.3657	82.3996	41.8131	6.52422	47.5261	-2.86726	4.13e-06	0.000355106	Gm5128	X
ENSMUSG00000049539	0	1.97767	4.27597	35.7111	27.7557	23.8932	2.08455	29.12	-3.81079	4.22e-06	0.0003613	Hist1h1a	13
ENSMUSG00000062327	64.0259	50.4306	40.6217	10.2032	15.6126	6.96885	51.6927	10.9282	2.22968	4.24e-06	0.000361404	T	17
ENSMUSG00000029149	66.1251	67.2408	84.4505	147.946	236.791	137.386	72.6054	174.041	-1.26488	4.4e-06	0.000373178	Krtcap3	5
ENSMUSG00000030158	602.473	847.432	687.363	1379.47	1092.01	1074.2	712.422	1181.89	-0.729533	4.48e-06	0.000378097	Clec12b	6
ENSMUSG00000025876	23.0913	36.5869	38.4838	71.4221	111.023	110.506	32.7206	97.6503	-1.57843	4.6e-06	0.000386553	Unc5a	13
ENSMUSG00000030747	129.101	132.504	118.658	239.774	536.899	196.123	126.754	324.265	-1.35712	4.65e-06	0.000389347	Dgat2	7
ENSMUSG00000074637	29.3889	47.4641	38.4838	2.04063	8.67365	5.9733	38.4456	5.56252	2.76759	4.88e-06	0.00040656	Sox2	3
ENSMUSG00000016763	533.199	483.54	536.635	278.546	300.976	356.407	517.791	311.976	0.730848	5.07e-06	0.00041825	Scube1	15
ENSMUSG00000037315	1196.55	1382.39	1121.37	2064.1	2044.38	1625.73	1233.44	1911.4	-0.631822	5.08e-06	0.00041825	Jade3	X
ENSMUSG00000025586	41.9842	65.2631	31.0008	139.783	183.881	86.6128	46.0827	136.759	-1.56777	5.09e-06	0.00041825	Cpeb1	7
ENSMUSG00000047674	6.29763	16.8102	27.7938	61.219	119.696	51.7686	16.9672	77.5613	-2.19772	5.12e-06	0.000419068	Pdha2	3
ENSMUSG00000032854	12.5953	15.8214	17.1039	55.0971	88.4712	42.8086	15.1735	62.1256	-2.03736	5.33e-06	0.000433748	Ugt8a	3
ENSMUSG00000026274	535.298	529.027	463.943	868.289	815.323	717.791	509.423	800.468	-0.65174	5.4e-06	0.000437443	Pask	1
ENSMUSG00000040111	2695.38	2524.5	2216.02	1816.16	1390.39	1659.58	2478.63	1622.04	0.612261	5.44e-06	0.000438115	Gramd1b	9
ENSMUSG00000071568	2.09921	0.988835	2.13799	44.8939	6.07155	48.7819	1.74201	33.2491	-4.25918	5.45e-06	0.000438115	Gm5874	6
ENSMUSG00000067338	224.615	739.649	516.324	2016.14	3831.15	2170.3	493.529	2672.53	-2.43692	5.51e-06	0.000439234	Tuba3b	6
ENSMUSG00000026915	820.791	890.94	894.747	1220.3	1605.49	1242.45	868.826	1356.08	-0.642917	5.52e-06	0.000439234	Strbp	2
ENSMUSG00000081137	53.5298	104.817	48.1047	169.372	267.148	134.399	68.817	190.307	-1.46617	5.54e-06	0.000439494	BC022960	X
ENSMUSG00000047281	501.711	354.003	390.183	210.185	269.75	181.19	415.299	220.375	0.91168	5.64e-06	0.000444903	Sfn	4
ENSMUSG00000026669	607.721	511.228	593.291	923.386	1058.18	780.511	570.747	920.694	-0.690832	5.85e-06	0.000459958	Mcm10	2
ENSMUSG00000024462	874.32	973.014	930.024	613.21	542.97	658.058	925.786	604.746	0.615259	6.39e-06	0.000498513	Gabbr1	17
ENSMUSG00000025857	314.881	300.606	259.765	476.488	523.021	448.993	291.751	482.834	-0.727069	6.4e-06	0.000498513	Dnaaf5	5
ENSMUSG00000040629	184.73	373.78	225.558	774.42	1840.55	951.745	261.356	1188.9	-2.18543	6.54e-06	0.000507125	Mael	1
ENSMUSG00000043453	6.29763	16.8102	21.3799	47.9549	106.686	49.7775	14.8292	68.1394	-2.20398	6.57e-06	0.000507663	Magea10	X
ENSMUSG00000051257	27.2897	89.984	63.0706	123.458	270.618	161.279	60.1148	185.118	-1.6223	6.66e-06	0.000512284	Trap1a	X
ENSMUSG00000085577	1.0496	5.93301	2.13799	29.5892	49.4398	18.9154	3.0402	32.6481	-3.41097	6.73e-06	0.000515137	Mageb6-ps	X
ENSMUSG00000029778	2159.04	2121.05	2023.6	1565.16	1085.94	1403.72	2101.23	1351.61	0.637289	6.77e-06	0.000516611	Adcyap1r1	6
ENSMUSG00000085146	1.0496	3.95534	2.13799	16.3251	55.5113	21.9021	2.38098	31.2462	-3.70756	7.09e-06	0.000538621	Eif2c5	X
ENSMUSG00000049382	918.404	717.894	589.015	395.883	483.989	405.189	741.771	428.354	0.791317	7.16e-06	0.000541544	Krt8	15
ENSMUSG00000031362	15.7441	20.7655	9.62094	38.772	77.1955	74.6662	15.3768	63.5446	-2.0442	7.22e-06	0.000543773	Xlr4c	X
ENSMUSG00000074595	78.7203	94.9282	101.554	211.205	250.668	144.355	91.7343	202.076	-1.141	7.27e-06	0.00054517	Wfdc6a	2
ENSMUSG00000044349	75.5715	87.0175	65.2086	157.129	228.984	136.39	75.9325	174.168	-1.19885	7.63e-06	0.00056985	Snhg11	2
ENSMUSG00000040013	181.582	394.545	285.421	771.359	1498.81	948.758	287.183	1072.97	-1.90149	7.68e-06	0.000570246	Fkbp6	5
ENSMUSG00000030110	204.673	342.137	168.901	424.451	665.269	432.068	238.57	507.263	-1.08785	7.7e-06	0.000570246	Ret	6
ENSMUSG00000043342	1886.14	1768.04	2409.51	1359.06	1268.95	1332.04	2021.23	1320.02	0.614624	7.73e-06	0.00057064	Hoxd9	2
ENSMUSG00000029135	1041.21	924.561	840.229	589.743	539.501	664.031	935.332	597.758	0.646604	7.82e-06	0.000572335	Fosl2	5
ENSMUSG00000074129	958.289	975.98	901.161	634.637	667.003	602.307	945.143	634.649	0.574288	7.82e-06	0.000572335	Rpl13a	7
ENSMUSG00000027547	93.4148	177.001	114.382	217.327	516.082	245.901	128.266	326.437	-1.34821	7.87e-06	0.000573794	Sall4	2
ENSMUSG00000036743	56.6786	57.3524	40.6217	103.052	179.544	115.484	51.5509	132.693	-1.36567	8.02e-06	0.000582541	Psma8	18
ENSMUSG00000013415	100.762	251.164	173.177	332.623	492.663	354.416	175.034	393.234	-1.16725	8.31e-06	0.000601021	Igf2bp1	11
ENSMUSG00000031966	348.469	427.177	451.115	809.111	586.338	665.027	408.92	686.825	-0.747259	8.54e-06	0.000614776	Glb1l3	9
ENSMUSG00000045004	1041.21	931.483	1071.13	405.065	439.754	781.506	1014.61	542.109	0.904701	8.69e-06	0.000623262	Spata21	4
ENSMUSG00000037541	409.346	552.759	378.424	268.343	202.963	266.807	446.843	246.038	0.863336	8.73e-06	0.000623558	Shank2	7
ENSMUSG00000048647	40.9346	32.6316	17.1039	73.4627	197.759	68.6929	30.2233	113.305	-1.90872	9.03e-06	0.000640147	Exd1	2
ENSMUSG00000040688	795.6	679.33	771.813	1124.39	1451.97	1023.42	748.914	1199.93	-0.680993	9.03e-06	0.000640147	Tbl3	17
ENSMUSG00000001985	8.39683	15.8214	6.41396	44.8939	63.3176	38.8264	10.2107	49.0126	-2.25734	9.54e-06	0.000671643	Grik3	4
ENSMUSG00000090744	12.5953	25.7097	9.62094	46.9345	122.298	48.7819	15.9753	72.6716	-2.18311	9.55e-06	0.000671643	Gm6871	7
ENSMUSG00000067547	112.308	101.85	146.452	389.761	143.983	368.353	120.203	300.699	-1.32172	9.77e-06	0.000684558	Gm7666	15
ENSMUSG00000031283	129.101	135.47	109.037	766.257	679.146	243.91	124.536	563.104	-2.17676	1.01e-05	0.000702373	Chrdl1	X
ENSMUSG00000061728	7.34723	4.94418	3.20698	16.3251	90.2059	25.8843	5.16613	44.1384	-3.10001	1.04e-05	0.000720873	Btnl7-ps	17
ENSMUSG00000010342	71.3731	165.135	94.0714	459.142	949.764	361.384	110.193	590.097	-2.42058	1.05e-05	0.000729327	Tex14	11
ENSMUSG00000041438	979.281	1149.03	986.681	1553.94	2281.17	1396.76	1038.33	1743.96	-0.7485	1.06e-05	0.00073384	Utp4	8
ENSMUSG00000013584	333.774	405.422	489.599	787.684	611.492	673.987	409.598	691.054	-0.754209	1.1e-05	0.000757844	Aldh1a2	9
ENSMUSG00000052688	537.397	482.551	335.664	785.643	708.637	802.413	451.871	765.564	-0.759871	1.14e-05	0.000781213	Rab7b	1
ENSMUSG00000020534	758.864	711.961	750.433	1079.49	1255.94	1005.5	740.419	1113.65	-0.589587	1.17e-05	0.000795779	Shmt1	11
ENSMUSG00000100009	5.24802	0.988835	1.06899	17.3454	65.0523	15.9288	2.43528	32.7755	-3.7636	1.21e-05	0.000824891	Gm7967	1
ENSMUSG00000000365	58.7778	165.135	101.554	442.817	1194.36	479.855	108.489	705.678	-2.70118	1.23e-05	0.000836075	Rnf17	14
ENSMUSG00000032101	136.449	139.426	143.245	212.226	576.797	238.932	139.706	342.652	-1.2966	1.25e-05	0.000842887	Ddx25	9
ENSMUSG00000020083	72.4227	62.2966	68.4156	120.397	195.157	142.364	67.7116	152.639	-1.17599	1.3e-05	0.000876328	Fam241b	10
ENSMUSG00000024087	828.138	619.011	767.537	459.142	410.263	504.743	738.229	458.05	0.688945	1.35e-05	0.00090458	Cyp1b1	17
ENSMUSG00000058806	673.846	561.658	659.569	456.081	303.578	366.362	631.691	375.34	0.75249	1.36e-05	0.000908541	Col13a1	10
ENSMUSG00000025732	1231.19	1204.4	1311.65	852.984	636.646	906.945	1249.08	798.858	0.645817	1.41e-05	0.000939465	Mcrip2	17
ENSMUSG00000000120	669.648	548.803	808.159	326.501	308.782	486.824	675.537	374.036	0.85334	1.43e-05	0.000945318	Ngfr	11
ENSMUSG00000020021	154.292	205.678	156.073	330.582	372.099	258.843	172.014	320.508	-0.897669	1.43e-05	0.000945318	Fgd6	10
ENSMUSG00000000037	356.865	610.111	467.15	1213.16	2392.19	1195.65	478.042	1600.33	-1.7432	1.44e-05	0.000948095	Scml2	X
ENSMUSG00000052374	8.39683	15.8214	17.1039	57.1377	79.7975	35.8398	13.774	57.5917	-2.06617	1.5e-05	0.000982733	Actn2	13
ENSMUSG00000001642	5801.16	4119.49	3926.41	6765.72	7934.65	6877.25	4615.69	7192.54	-0.640043	1.52e-05	0.00099145	Akr1b3	6
ENSMUSG00000028532	658.102	389.601	452.184	277.526	180.412	306.629	499.962	254.856	0.973839	1.55e-05	0.00100903	Cachd1	4
ENSMUSG00000033732	2984.02	2672.82	3077.63	4256.76	4633.46	3702.45	2911.49	4197.56	-0.528022	1.62e-05	0.00104669	Sf3b3	8
ENSMUSG00000029769	239.31	263.03	187.074	348.948	623.635	376.318	229.805	449.634	-0.969325	1.67e-05	0.00107548	Ccdc136	6
ENSMUSG00000061186	140.647	213.588	138.969	356.09	342.609	254.861	164.401	317.853	-0.949773	1.74e-05	0.00112177	Sfmbt2	2
ENSMUSG00000006998	4172.18	4105.64	4256.73	5894.37	7184.38	5251.52	4178.18	6110.09	-0.548489	1.77e-05	0.00112974	Psmd2	16
ENSMUSG00000096834	1.0496	1.97767	3.20698	21.4266	39.8988	16.9243	2.07808	26.0832	-3.65843	1.77e-05	0.00112974	Gm15127	X
ENSMUSG00000003051	132.25	144.37	188.143	66.3205	70.2565	80.6395	154.921	72.4055	1.09702	1.77e-05	0.00112974	Elf3	1
ENSMUSG00000050424	57.7282	38.5646	52.3807	225.49	480.52	127.43	49.5578	277.813	-2.48822	1.78e-05	0.00113074	Pnma5	X
ENSMUSG00000009941	172.135	311.483	249.075	849.923	2497.14	822.324	244.231	1389.8	-2.50858	1.79e-05	0.00113135	Nxf2	X
ENSMUSG00000048636	575.183	515.183	605.05	383.639	268.883	367.358	565.139	339.96	0.734936	1.8e-05	0.00113135	A730049H05Rik	6
ENSMUSG00000024837	1691.96	2537.35	2058.88	2999.73	3629.92	3155.89	2096.06	3261.85	-0.637971	1.8e-05	0.00113135	Dmrt1	19
ENSMUSG00000086841	993.975	1251.87	927.886	708.099	648.789	700.867	1057.91	685.918	0.625861	1.85e-05	0.00115789	2410006H16Rik	11
ENSMUSG00000087522	5.24802	10.8772	4.27597	23.4673	69.3892	33.8487	6.80039	42.235	-2.6307	1.87e-05	0.00116427	Gm371	X
ENSMUSG00000031778	830.237	972.025	819.918	575.458	398.988	612.263	874.06	528.903	0.726403	1.9e-05	0.00118323	Cx3cl1	8
ENSMUSG00000037266	9169.34	8760.09	8203.45	6420.85	6599.78	6268.97	8710.96	6429.87	0.43802	1.94e-05	0.00119699	Rsrp1	4
ENSMUSG00000038932	86.0676	138.437	79.1055	283.648	720.78	325.545	101.203	443.324	-2.13097	1.94e-05	0.00119699	Tcfl5	2
ENSMUSG00000041801	942.545	988.835	1155.58	604.027	700.831	727.747	1028.99	677.535	0.602355	1.98e-05	0.00121565	Phlda3	1
ENSMUSG00000067835	2.09921	0.988835	2.13799	15.3047	41.6335	18.9154	1.74201	25.2846	-3.87495	1.99e-05	0.00121565	Gm14661	X
ENSMUSG00000001334	957.239	978.947	786.779	1418.24	1242.07	1392.77	907.655	1351.03	-0.573223	1.99e-05	0.00121565	Fndc5	4
ENSMUSG00000090626	153.242	176.013	144.314	240.795	319.19	290.7	157.856	283.562	-0.845426	2.1e-05	0.00128019	Tex9	9
ENSMUSG00000010592	545.794	1322.07	913.989	2961.98	7580.77	3739.28	927.285	4760.68	-2.36006	2.14e-05	0.00129875	Dazl	17
ENSMUSG00000036478	2092.91	1833.3	2141.19	1333.55	1304.52	1549.07	2022.47	1395.71	0.535188	2.15e-05	0.00129875	Btg1	10
ENSMUSG00000028527	141.697	218.533	179.591	280.587	562.92	298.665	179.94	380.724	-1.08239	2.34e-05	0.00140785	Ak4	4
ENSMUSG00000074887	2.09921	5.93301	8.55195	21.4266	62.4503	29.8665	5.52806	37.9145	-2.78434	2.34e-05	0.00140785	EU599041	7
ENSMUSG00000045010	72.4227	132.504	70.5536	295.892	684.351	282.736	91.8267	420.993	-2.19651	2.39e-05	0.00142822	Gm4779	X
ENSMUSG00000039476	1037.01	953.237	948.197	661.165	570.726	726.751	979.481	652.881	0.586027	2.45e-05	0.00145593	Prrx2	2
ENSMUSG00000000531	864.874	794.035	817.78	581.58	425.876	574.432	825.563	527.296	0.648134	2.45e-05	0.00145593	Grasp	15
ENSMUSG00000047139	1134.62	927.527	1106.41	592.804	721.647	754.626	1056.19	689.692	0.614164	2.5e-05	0.0014842	Cd24a	10
ENSMUSG00000039911	1447.4	1276.59	1368.31	773.399	751.138	1084.15	1364.1	869.563	0.649977	2.54e-05	0.0015011	Spsb1	4
ENSMUSG00000028024	2318.58	2168.52	2090.95	1615.16	1563.86	1119	2192.68	1432.67	0.613803	2.55e-05	0.0015011	Enpep	3
ENSMUSG00000045822	80.8195	82.0733	67.3466	135.702	229.852	142.364	76.7465	169.306	-1.14366	2.59e-05	0.00151653	Zswim3	2
ENSMUSG00000030031	107.06	103.828	114.382	161.21	365.161	201.101	108.423	242.49	-1.1643	2.59e-05	0.00151653	Kbtbd8	6
ENSMUSG00000033405	104.96	87.0175	68.4156	162.23	203.831	166.257	86.7978	177.439	-1.03253	2.72e-05	0.00158496	Nudt15	14
ENSMUSG00000036564	255.054	261.052	244.799	364.253	747.668	391.251	253.635	501.057	-0.983846	2.73e-05	0.00158496	Ndrg4	8
ENSMUSG00000047220	26.2401	49.4418	53.4497	72.4424	196.024	114.488	43.0438	127.652	-1.57109	2.8e-05	0.00162195	Ccdc36	9
ENSMUSG00000022432	38.8354	154.258	63.0706	365.273	1078.13	564.476	85.3881	669.295	-2.96989	3.05e-05	0.00175525	Smc1b	15
ENSMUSG00000035653	200.474	98.8835	137.9	51.0158	51.1745	76.6573	145.753	59.6159	1.29044	3.05e-05	0.00175525	Lrfn5	12
ENSMUSG00000028525	221.467	154.258	176.384	405.065	279.291	322.558	184.036	335.638	-0.86636	3.07e-05	0.00176052	Pde4b	4
ENSMUSG00000004661	172.135	187.879	119.727	313.237	390.314	233.954	159.914	312.502	-0.966746	3.18e-05	0.00182193	Arid3b	9
ENSMUSG00000069044	46.1826	88.0063	33.1388	119.377	287.965	103.537	55.7759	170.293	-1.60974	3.58e-05	0.00204296	Usp9y	Y
ENSMUSG00000025608	419.842	402.456	564.428	802.989	608.89	933.825	462.242	781.901	-0.758096	3.8e-05	0.0021552	Podxl	6
ENSMUSG00000079479	1.0496	3.95534	1.06899	18.3657	32.9599	20.9065	2.02465	24.0774	-3.55485	3.8e-05	0.0021552	Gm9112	X
ENSMUSG00000022724	331.675	310.494	258.696	494.853	628.839	411.162	300.289	511.618	-0.769592	3.84e-05	0.00216904	Riox2	16
ENSMUSG00000095478	427.189	358.947	339.94	458.122	761.546	734.715	375.359	651.461	-0.796262	3.86e-05	0.00216904	Gm9824	10
ENSMUSG00000034685	648.655	606.156	720.501	462.203	367.763	446.006	658.438	425.324	0.631474	3.86e-05	0.00216904	Fam171a2	11
ENSMUSG00000026219	4620.36	5164.69	4380.73	6786.12	7341.37	5899.63	4721.93	6675.71	-0.499562	3.88e-05	0.00217241	Trip12	1
ENSMUSG00000041567	192.078	109.761	165.694	93.8691	47.7051	51.7686	155.844	64.4476	1.27755	3.93e-05	0.00219002	Serpina12	12
ENSMUSG00000051316	699.036	972.025	942.852	1167.24	1903.87	1316.12	871.304	1462.41	-0.747581	4.04e-05	0.00224515	Taf7	18
ENSMUSG00000044338	313.832	288.74	360.251	169.372	143.115	223.999	320.941	178.829	0.845388	4.1e-05	0.00227481	Aplnr	2
ENSMUSG00000095599	1.0496	4.94418	4.27597	18.3657	66.7871	13.9377	3.42325	33.0302	-3.2714	4.15e-05	0.00229384	Gm6215	X
ENSMUSG00000032936	20.9921	36.5869	17.1039	62.2393	125.768	58.7374	24.8943	82.2482	-1.72331	4.24e-05	0.00233428	Camkv	9
ENSMUSG00000059625	58.7778	79.1068	54.5187	217.327	788.434	220.016	64.1344	408.593	-2.6716	4.25e-05	0.0023347	Sohlh1	2
ENSMUSG00000054626	24.1409	23.732	14.9659	52.0361	85.0017	60.7285	20.9463	65.9221	-1.65484	4.38e-05	0.00239947	Xlr	X
ENSMUSG00000094378	4.19842	12.8549	1.06899	15.3047	72.8586	44.7997	6.04076	44.321	-2.86344	4.4e-05	0.00240153	Gm15097	X
ENSMUSG00000092060	240.359	321.371	195.626	474.447	627.105	340.478	252.452	480.676	-0.929103	4.74e-05	0.00258215	Bend4	5
ENSMUSG00000056300	31.4881	88.0063	54.5187	108.153	275.822	121.457	58.0044	168.477	-1.5385	4.87e-05	0.00264536	Zfp981	4
ENSMUSG00000054932	48.2818	118.66	58.7946	160.19	220.311	158.292	75.2455	179.598	-1.25296	4.93e-05	0.00267025	Afp	5
ENSMUSG00000026121	889.015	947.304	942.852	682.591	532.562	656.067	926.39	623.74	0.571837	5.01e-05	0.00270158	Sema4c	1
ENSMUSG00000032291	37.7858	66.2519	29.9318	152.027	596.747	198.114	44.6565	315.629	-2.82079	5.2e-05	0.00279941	Crabp1	9
ENSMUSG00000069310	13.6449	7.91068	14.9659	42.8533	59.8482	38.8264	12.1738	47.176	-1.96209	5.32e-05	0.0028544	Hist1h3c	13
ENSMUSG00000040570	155.341	203.7	131.486	224.47	501.337	301.651	163.509	342.486	-1.06758	5.34e-05	0.00285481	Rundc3b	5
ENSMUSG00000043557	574.134	714.928	582.601	458.122	244.597	362.38	623.888	355.033	0.815742	5.47e-05	0.00291796	Mdga1	17
ENSMUSG00000027719	35.6865	52.4083	22.4489	70.4018	163.932	90.595	36.8479	108.31	-1.55518	5.54e-05	0.00294358	Adad1	3
ENSMUSG00000025089	117.556	232.376	146.452	287.729	405.059	289.705	165.461	327.498	-0.984431	5.56e-05	0.00294984	Gfra1	19
ENSMUSG00000052942	79.7699	164.147	95.1404	212.226	327.864	199.11	113.019	246.4	-1.12389	5.58e-05	0.00295024	Glis3	19
ENSMUSG00000043661	6.29763	10.8772	10.6899	32.6501	85.0017	23.8932	9.28825	47.1817	-2.34902	5.62e-05	0.00295862	Gm9785	X
ENSMUSG00000039329	238.26	300.606	242.661	702.998	1602.02	584.387	260.509	963.136	-1.88657	5.63e-05	0.00295862	Tex19.1	11
ENSMUSG00000038095	2406.74	2920.03	2166.85	3563.96	4401.01	3279.34	2497.87	3748.1	-0.585498	5.65e-05	0.00296211	Sbno1	5
ENSMUSG00000052684	1709.81	1903.51	2118.74	1336.61	1181.35	1448.52	1910.69	1322.16	0.531545	5.73e-05	0.00299497	Jun	4
ENSMUSG00000071350	189.978	152.281	138.969	257.12	385.11	250.878	160.409	297.703	-0.894101	5.97e-05	0.00310899	Setdb2	14
ENSMUSG00000045672	902.66	667.464	857.333	551.991	469.244	551.534	809.152	524.257	0.626494	6.04e-05	0.0031354	Col27a1	4
ENSMUSG00000030309	716.88	822.711	677.742	1020.32	1377.38	1011.48	739.111	1136.39	-0.621021	6.09e-05	0.0031486	Caprin2	6
ENSMUSG00000043289	3.14881	4.94418	7.48295	17.3454	58.1134	26.8798	5.19198	34.1129	-2.7243	6.1e-05	0.0031486	Mei4	9
ENSMUSG00000028358	1198.65	1194.51	946.059	822.375	671.34	739.693	1113.07	744.469	0.581118	6.17e-05	0.00317998	Zfp618	4
ENSMUSG00000060499	107.06	210.622	136.831	412.208	872.569	397.224	151.504	560.667	-1.88771	6.36e-05	0.003268	Rpl10l	12
ENSMUSG00000051220	574.134	553.748	605.05	750.953	1111.96	841.239	577.644	901.384	-0.643108	6.43e-05	0.0032912	Ercc6l	X
ENSMUSG00000038116	1050.65	1233.08	1024.1	1517.21	2086.01	1464.45	1102.61	1689.22	-0.615773	6.45e-05	0.0032912	Phf20	2
ENSMUSG00000024968	262.401	251.164	266.179	379.558	640.115	372.335	259.915	464.003	-0.838023	6.7e-05	0.00341068	Rcor2	19
ENSMUSG00000091497	1.0496	8.89952	9.62094	51.0158	224.647	53.7597	6.52335	109.808	-4.073	6.73e-05	0.00341368	Gm44	X
ENSMUSG00000010064	106.01	167.113	146.452	71.4221	58.1134	68.6929	139.858	66.0761	1.08478	6.74e-05	0.00341368	Slc38a3	9
ENSMUSG00000095698	2.09921	0	2.13799	26.5282	24.2862	12.9421	1.4124	21.2522	-3.93593	6.86e-05	0.00346397	Rhox2d	X
ENSMUSG00000025995	1171.36	1130.24	1179.1	1452.93	2477.19	1646.64	1160.23	1858.92	-0.680683	6.97e-05	0.00351125	Wdr75	1
ENSMUSG00000032902	768.31	1067.94	1091.44	1412.12	1695.7	1378.84	975.898	1495.55	-0.616126	7.03e-05	0.00352826	Slc16a1	3
ENSMUSG00000091705	4.19842	5.93301	2.13799	15.3047	71.1239	15.9288	4.0898	34.1191	-3.05931	7.1e-05	0.00355381	H2-Q2	17
ENSMUSG00000035378	212.02	247.209	277.938	363.232	551.644	367.358	245.722	427.411	-0.80037	7.12e-05	0.00355385	Shq1	6
ENSMUSG00000029168	651.804	747.559	615.74	489.752	435.417	410.166	671.701	445.112	0.594382	7.18e-05	0.00357391	Dpysl5	5
ENSMUSG00000114816	4.19842	3.95534	1.06899	16.3251	42.5009	20.9065	3.07425	26.5775	-3.10935	7.23e-05	0.0035897	Gm10323	13
ENSMUSG00000041805	28.3393	91.9617	32.0698	192.84	344.344	227.981	50.7903	255.055	-2.3265	7.28e-05	0.00360338	Pramel1	4
ENSMUSG00000106734	435.586	658.564	466.081	300.993	324.394	322.558	520.077	315.982	0.719321	7.3e-05	0.00360338	Gm20559	6
ENSMUSG00000030946	285.492	271.93	330.319	532.605	451.03	423.108	295.914	468.914	-0.664272	7.33e-05	0.00360941	Lhpp	7
ENSMUSG00000035232	787.203	851.387	899.023	1116.23	1307.99	1188.69	845.871	1204.3	-0.510158	7.67e-05	0.00375422	Pdk3	X
ENSMUSG00000018548	1349.79	1320.09	1310.59	1747.8	2248.21	1735.24	1326.82	1910.42	-0.526408	7.67e-05	0.00375422	Trim37	11
ENSMUSG00000097248	494.364	324.338	446.839	170.393	265.414	267.803	421.847	234.536	0.844928	7.69e-05	0.00375422	Gm2694	8
ENSMUSG00000024451	405.147	337.193	365.596	242.835	228.117	225.99	369.312	232.314	0.668765	7.7e-05	0.00375422	Arap3	18
ENSMUSG00000028633	1353.99	1476.33	1512.63	1950.84	2644.59	1869.64	1447.65	2155.03	-0.574453	7.81e-05	0.00378566	Ctps	4
ENSMUSG00000079465	722.128	930.494	594.36	1373.35	962.775	1331.05	748.994	1222.39	-0.705636	7.82e-05	0.00378566	Col4a3	1
ENSMUSG00000020419	9.44644	23.732	7.48295	36.7314	85.0017	46.7908	13.5538	56.1746	-2.04648	7.83e-05	0.00378566	Hormad2	11
ENSMUSG00000031665	24.1409	39.5534	37.4148	83.6659	162.197	55.7508	33.703	100.538	-1.57961	7.87e-05	0.00379522	Sall1	8
ENSMUSG00000060967	390.453	654.609	660.638	925.427	934.152	930.839	568.566	930.139	-0.709915	7.91e-05	0.00380285	Etd	X
ENSMUSG00000019312	33.5873	37.5757	40.6217	54.0767	228.117	79.6439	37.2616	120.613	-1.69883	8.2e-05	0.00393169	Grb7	11
ENSMUSG00000039200	68.2243	75.1515	76.9675	126.519	222.045	126.435	73.4478	158.333	-1.11134	8.26e-05	0.00394706	Atf7ip2	16
ENSMUSG00000024266	46.1826	74.1626	26.7248	80.605	244.597	113.493	49.0233	146.231	-1.57648	8.28e-05	0.00394706	Adad2	8
ENSMUSG00000031594	6.29763	23.732	25.6558	55.0971	68.5218	67.6974	18.5618	63.7721	-1.77984	8.36e-05	0.00397494	Fgl1	8
ENSMUSG00000031239	10275.6	8822.39	10741.2	7144.25	7602.45	7241.63	9946.42	7329.44	0.440389	8.58e-05	0.00407151	Itm2a	X
ENSMUSG00000069041	193.127	412.344	242.661	840.74	1928.15	796.439	282.711	1188.44	-2.07159	8.62e-05	0.00407151	Slc25a31	3
ENSMUSG00000029112	8.39683	16.8102	12.8279	44.8939	117.962	19.911	12.6783	60.9222	-2.26668	8.63e-05	0.00407151	Nkx1-1	5
ENSMUSG00000026832	159.54	178.979	126.141	276.506	234.188	310.611	154.887	273.768	-0.819401	8.73e-05	0.00411085	Cytip	2
ENSMUSG00000038384	529.001	732.727	579.394	421.39	330.466	406.184	613.707	386.014	0.670598	8.76e-05	0.00411163	Setd1b	5
ENSMUSG00000041936	1836.81	2020.19	1685.8	1315.19	1129.31	1424.63	1847.6	1289.71	0.519243	8.8e-05	0.00412328	Agrn	4
ENSMUSG00000024437	9.44644	6.92185	9.62094	365.273	157.86	14.9332	8.66307	179.356	-4.3725	8.98e-05	0.00419587	Gm8615	5
ENSMUSG00000030757	47.2322	64.2743	56.6566	122.438	129.237	105.528	56.0544	119.068	-1.08648	9.02e-05	0.00420228	Zkscan2	7
ENSMUSG00000053909	17.8433	17.799	17.1039	32.6501	124.901	45.7953	17.5821	67.782	-1.95208	9.04e-05	0.00420245	Rhox10	X
ENSMUSG00000042386	27.2897	99.8723	74.8295	286.709	612.359	251.874	67.3305	383.647	-2.51016	9.32e-05	0.00431957	Tex13b	X
ENSMUSG00000034171	58.7778	84.051	59.8636	123.458	185.616	124.444	67.5641	144.506	-1.09736	9.37e-05	0.00433348	Faah	4
ENSMUSG00000005268	1408.57	1425.9	901.161	859.106	736.393	762.591	1245.21	786.03	0.6643	9.57e-05	0.00441381	Prlr	15
ENSMUSG00000009596	171.085	408.389	277.938	924.406	2336.68	866.128	285.804	1375.74	-2.26707	9.72e-05	0.00447046	Taf7l	X
ENSMUSG00000027444	360.014	354.992	482.116	588.722	610.625	652.085	399.041	617.144	-0.629728	0.000101468	0.0046554	8030411F24Rik	2
ENSMUSG00000024597	801.898	837.543	866.954	1142.75	1229.92	1116.01	835.465	1162.9	-0.477405	0.000102062	0.00466919	Slc12a2	18
ENSMUSG00000061353	6064.61	5365.42	6338.06	4171.05	3218.79	4728.86	5922.7	4039.57	0.552233	0.000102706	0.00466919	Cxcl12	6
ENSMUSG00000039899	915.255	1501.05	1164.13	1882.48	2464.18	1554.05	1193.48	1966.91	-0.720826	0.000102776	0.00466919	Fgl2	5
ENSMUSG00000079009	12.5953	19.7767	13.8969	33.6704	80.6649	50.773	15.423	55.0361	-1.83653	0.000102801	0.00466919	Gm14139	2
ENSMUSG00000040010	6121.29	6319.64	6479.17	4816.91	4971.73	4614.37	6306.7	4801.01	0.393484	0.000103811	0.00470322	Slc7a5	8
ENSMUSG00000074731	7.34723	17.799	11.7589	30.6095	101.482	32.8531	12.3017	54.9814	-2.16127	0.000105986	0.00478662	Zfp345	2
ENSMUSG00000028884	1429.56	1374.48	1683.66	1962.07	2488.47	2023.95	1495.9	2158.16	-0.529329	0.000106181	0.00478662	Rpa2	4
ENSMUSG00000024163	2101.31	2224.88	1811.94	1569.25	1404.26	1416.67	2046.04	1463.39	0.483882	0.000106906	0.00480732	Mapk8ip3	17
ENSMUSG00000070570	4.19842	3.95534	10.6899	25.5079	47.7051	27.8754	6.28123	33.6961	-2.43528	0.000107271	0.00481176	Slc17a7	7
ENSMUSG00000022602	22.0417	26.6985	13.8969	45.9142	96.2775	56.7463	20.879	66.3127	-1.66776	0.000108264	0.00484427	Arc	15
ENSMUSG00000036306	59.8274	83.0621	64.1396	128.56	145.717	140.372	69.0097	138.217	-1.0009	0.000108576	0.00484624	Lzts1	8
ENSMUSG00000046338	79.7699	166.124	93.0024	355.07	737.26	290.7	112.966	461.01	-2.02868	0.000108872	0.00484751	Gpat2	2
ENSMUSG00000047013	70.3235	91.9617	45.9667	122.438	286.23	118.47	69.4173	175.713	-1.3408	0.000110454	0.00490584	Fbxo41	6
ENSMUSG00000033147	358.965	289.729	292.904	191.819	176.075	206.079	313.866	191.324	0.714932	0.000112478	0.00498349	Slc22a15	3
ENSMUSG00000061666	192.078	277.863	198.833	308.135	538.633	370.344	222.924	405.704	-0.864511	0.000113062	0.00499712	Gdpd1	11
ENSMUSG00000020380	939.396	757.448	707.674	1078.47	1386.92	1142.89	801.506	1202.76	-0.586146	0.000113838	0.00501914	Rad50	11
ENSMUSG00000031546	795.6	774.258	847.712	1023.38	1246.4	1162.8	805.857	1144.19	-0.506382	0.000114484	0.00503533	Gins4	8
ENSMUSG00000031134	3169.8	2963.54	2822.14	2288.57	2004.48	2293.75	2985.16	2195.6	0.443484	0.000119254	0.00522341	Rbmx	X
ENSMUSG00000036427	2128.6	2165.55	2341.1	3005.85	3293.38	2756.68	2211.75	3018.64	-0.448957	0.000119338	0.00522341	Gpi1	7
ENSMUSG00000053559	59.8274	91.9617	95.1404	110.194	338.272	162.275	82.3098	203.58	-1.30904	0.000120065	0.00524256	Smagp	15
ENSMUSG00000032221	461.826	387.623	565.497	677.49	835.272	693.898	471.649	735.553	-0.642488	0.000121705	0.00530137	Mns1	9
ENSMUSG00000022199	3373.43	3615.18	3420.78	2677.31	2100.76	2678.03	3469.8	2485.36	0.481798	0.000122205	0.00531034	Slc22a17	14
ENSMUSG00000019301	4849.17	4161.02	5043.51	2781.38	2187.49	3922.46	4684.57	2963.78	0.660681	0.000122802	0.0053205	Hsd17b1	11
ENSMUSG00000068551	1189.2	1260.76	1052.96	804.009	675.677	903.959	1167.64	794.548	0.556352	0.000123028	0.0053205	Zfp467	6
ENSMUSG00000026049	458.677	545.837	585.808	737.688	1048.64	724.76	530.107	837.031	-0.659978	0.00012416	0.00535665	Tex30	1
ENSMUSG00000058147	20.9921	59.3301	55.5877	177.535	404.192	143.359	45.3033	241.695	-2.41565	0.00012589	0.00541835	Xlr3c	X
ENSMUSG00000019817	7768.12	7531.96	7647.58	6261.68	5278.78	5684.59	7649.22	5741.68	0.413957	0.000127328	0.00546725	Plagl1	10
ENSMUSG00000036395	145.895	177.001	198.833	260.181	360.824	278.754	173.91	299.919	-0.788	0.000127738	0.00547185	Glb1l2	9
ENSMUSG00000021981	600.374	542.87	618.947	831.558	1052.11	763.586	587.397	882.419	-0.588249	0.000129651	0.00554068	Cab39l	14
ENSMUSG00000020696	130.151	234.354	164.625	270.384	429.345	298.665	176.377	332.798	-0.91615	0.000130046	0.00554443	Rffl	11
ENSMUSG00000070476	67.1747	80.0956	82.3125	128.56	228.984	128.426	76.5276	161.99	-1.0849	0.000131269	0.00558339	Fam217b	2
ENSMUSG00000073294	15.7441	17.799	14.9659	52.0361	65.0523	38.8264	16.1697	51.9716	-1.6856	0.000133246	0.00564891	AU022751	X
ENSMUSG00000045763	1113.63	1310.21	1326.62	2204.9	1506.61	1871.63	1250.15	1861.05	-0.573505	0.000133513	0.00564891	Basp1	15
ENSMUSG00000041729	506.959	739.649	580.463	369.354	214.239	432.068	609.024	338.554	0.849373	0.000133746	0.00564891	Coro2b	9
ENSMUSG00000026576	573.084	684.274	643.534	881.553	894.253	926.856	633.631	900.887	-0.507421	0.00013628	0.00573217	Atp1b1	1
ENSMUSG00000039987	540.546	628.899	527.014	752.993	995.735	796.439	565.486	848.389	-0.585689	0.000136352	0.00573217	Phtf2	5
ENSMUSG00000074505	392.552	330.271	422.252	274.465	185.616	230.967	381.692	230.349	0.730369	0.000141115	0.00591865	Fat3	9
ENSMUSG00000031654	6081.41	5225.99	7250.98	2164.09	1519.62	3410.75	6186.13	2364.82	1.38739	0.000143826	0.00601838	Cbln1	8
ENSMUSG00000053289	812.394	1067.94	925.748	1144.79	2270.76	1364.9	935.361	1593.48	-0.769071	0.000145371	0.006069	Ddx10	9
ENSMUSG00000026249	6639.8	8302.26	6501.62	5160.76	5256.23	5185.82	7147.89	5200.93	0.458807	0.000146432	0.00608571	Serpine2	1
ENSMUSG00000057000	120.704	138.437	62.0016	338.745	227.25	153.315	107.048	239.77	-1.16121	0.000146445	0.00608571	Nxf3	X
ENSMUSG00000028214	942.545	848.42	943.921	707.079	622.768	568.459	911.629	632.768	0.526845	0.000147692	0.00610618	Gem	4
ENSMUSG00000050471	440.834	456.842	518.462	662.185	856.089	635.16	472.046	717.811	-0.605884	0.000147914	0.00610618	Fam118b	9
ENSMUSG00000022652	103.911	141.403	59.8636	307.115	765.016	295.678	101.726	455.936	-2.16395	0.000148227	0.00610618	Morc1	16
ENSMUSG00000107488	8.39683	7.91068	6.41396	11.2235	111.023	22.8976	7.57382	48.3813	-2.68058	0.000148289	0.00610618	Gm31579	6
ENSMUSG00000021270	11251.8	12569.1	12506.2	15130.3	23386.8	15701.8	12109	18072.9	-0.577814	0.000149132	0.00612697	Hsp90aa1	12
ENSMUSG00000022610	65.0755	94.9282	89.7954	183.657	137.911	163.27	83.2664	161.613	-0.954342	0.000153986	0.00631203	Mapk12	15
ENSMUSG00000043753	442.933	625.933	420.114	922.366	747.668	699.871	496.327	789.968	-0.669408	0.000155391	0.0063552	Dmrta1	4
ENSMUSG00000019214	331.675	297.639	447.908	524.442	704.3	529.632	359.074	586.125	-0.708659	0.000156404	0.00637762	Chtf18	17
ENSMUSG00000110331	214.119	196.778	287.559	560.153	247.199	574.432	232.819	460.595	-0.983443	0.000156645	0.00637762	Nudc-ps1	8
ENSMUSG00000028572	742.07	1033.33	692.708	1134.59	1551.72	1187.69	822.704	1291.33	-0.650422	0.000158042	0.00642006	Hook1	4
ENSMUSG00000028487	168.986	217.544	107.968	288.749	416.335	253.865	164.833	319.65	-0.955289	0.000159837	0.0064784	Bnc2	4
ENSMUSG00000018920	325.377	265.008	286.49	173.454	196.024	167.252	292.292	178.91	0.706464	0.000160215	0.00647922	Cxcl16	11
ENSMUSG00000024366	1.0496	0	2.13799	7.14221	42.5009	12.9421	1.06253	20.8617	-4.32903	0.000161014	0.00648678	Gfra3	18
ENSMUSG00000038576	55.629	85.0398	91.9334	136.722	189.953	143.359	77.5341	156.678	-1.01656	0.00016112	0.00648678	Susd4	1
ENSMUSG00000041117	2379.45	1997.45	2149.75	1646.79	1265.48	1647.63	2175.55	1519.97	0.517805	0.000161861	0.00650214	Ccdc8	7
ENSMUSG00000026418	372.61	249.186	337.802	115.296	228.984	163.27	319.866	169.183	0.914884	0.000164429	0.00657848	Tnni1	1
ENSMUSG00000022066	75.5715	116.683	48.1047	43.8736	9.54101	7.96439	80.1196	20.4597	1.9812	0.000164573	0.00657848	Entpd4b	14
ENSMUSG00000053080	2694.33	2437.48	2407.37	1875.34	1370.44	1947.29	2513.06	1731.02	0.538349	0.000164853	0.00657848	2700081O15Rik	19
ENSMUSG00000021710	609.82	624.944	675.604	896.858	1065.12	816.35	636.789	926.111	-0.541197	0.000168204	0.00668559	Nln	13
ENSMUSG00000042686	36.7361	29.6651	34.2078	64.2799	147.452	63.7152	33.5363	91.8157	-1.45847	0.000168277	0.00668559	Jph1	1
ENSMUSG00000036902	245.607	190.845	235.179	322.42	513.48	327.536	223.877	387.812	-0.795118	0.000169872	0.00673298	Neto2	8
ENSMUSG00000079019	1155.61	734.704	983.474	588.722	396.386	708.831	957.931	564.646	0.763441	0.000170215	0.00673298	Insl3	8
ENSMUSG00000036620	3532.97	3350.17	4032.24	2306.93	2431.22	2997.6	3638.46	2578.59	0.496746	0.000174637	0.00687987	Mgat4b	11
ENSMUSG00000020656	15.7441	8.89952	17.1039	36.7314	86.7365	33.8487	13.9158	52.4388	-1.92334	0.000174689	0.00687987	Grhl1	12
ENSMUSG00000033565	2868.57	3184.05	2848.87	2203.88	2011.42	2363.43	2967.16	2192.91	0.436562	0.000181054	0.00710335	Rbfox2	15
ENSMUSG00000048899	32.5377	73.1738	29.9318	90.8081	175.208	94.5772	45.2144	120.198	-1.40901	0.000181475	0.00710335	Rimkla	4
ENSMUSG00000055874	2.09921	2.96651	0	14.2844	27.7557	17.9199	1.68857	19.9867	-3.54906	0.000181666	0.00710335	Foxi3	6
ENSMUSG00000021182	204.673	265.008	202.04	353.029	652.258	288.709	223.907	431.332	-0.94705	0.000181936	0.00710335	Ccdc88c	12
ENSMUSG00000049916	14.6945	22.7432	27.7938	51.0158	99.7469	48.7819	21.7438	66.5149	-1.61772	0.000182484	0.00710942	2610318N02Rik	16
ENSMUSG00000078955	0	7.91068	8.55195	29.5892	71.1239	13.9377	5.48754	38.2169	-2.80152	0.000185913	0.00722741	Gm14222	2
ENSMUSG00000028953	1498.83	1381.4	1364.04	2071.24	2621.18	1653.61	1414.76	2115.34	-0.580761	0.000186632	0.00723981	Abcf2	5
ENSMUSG00000001661	455.528	387.623	350.63	259.16	227.25	272.781	397.927	253.063	0.6542	0.000189017	0.00731661	Hoxc6	15
ENSMUSG00000045319	196.276	181.946	238.386	308.135	320.925	364.371	205.536	331.144	-0.688849	0.00019095	0.00737566	Proser2	2
ENSMUSG00000041577	87.1172	106.794	113.313	191.819	158.728	207.074	102.408	185.874	-0.858501	0.000194754	0.00750652	Prelp	1
ENSMUSG00000078532	97.6132	116.683	83.3815	164.271	267.148	155.306	99.2257	195.575	-0.980324	0.000196006	0.00753287	Nkain1	4
ENSMUSG00000026204	45.133	72.185	43.8287	19.386	6.93892	20.9065	53.7156	15.7438	1.78511	0.000196527	0.00753287	Ptprn	1
ENSMUSG00000054727	2.09921	10.8772	21.3799	41.833	83.267	31.8576	11.4521	52.3192	-2.19807	0.000196687	0.00753287	1700013H16Rik	X
ENSMUSG00000025503	1755.99	1439.74	1815.15	2314.08	2621.18	2130.48	1670.29	2355.24	-0.496237	0.00020112	0.00768636	Taldo1	7
ENSMUSG00000021953	5.24802	2.96651	3.20698	29.5892	39.0314	10.951	3.80717	26.5239	-2.80663	0.000201886	0.00768801	Tdh	14
ENSMUSG00000041974	458.677	421.244	455.391	650.962	693.024	588.37	445.104	644.119	-0.533939	0.000202014	0.00768801	Spidr	16
ENSMUSG00000024247	4738.96	4205.52	5928.64	3724.15	2683.63	3607.87	4957.71	3338.55	0.570613	0.00020739	0.00786448	Pkdcc	17
ENSMUSG00000074830	2.09921	9.88835	3.20698	10.2032	62.4503	31.8576	5.06485	34.837	-2.7747	0.000207607	0.00786448	Zfp640	13
ENSMUSG00000022415	652.854	719.872	601.843	469.345	456.234	443.019	658.19	456.2	0.529261	0.000207956	0.00786448	Syngr1	15
ENSMUSG00000029848	11.5456	84.051	69.4846	300.993	1660.14	382.291	55.0271	781.14	-3.82719	0.000208783	0.00787925	Stra8	6
ENSMUSG00000022119	2184.23	2419.68	2275.89	1835.55	1536.97	1696.42	2293.26	1689.64	0.441136	0.000210778	0.00793798	Rbm26	14
ENSMUSG00000044312	2.09921	1.97767	0	12.2438	45.103	6.96885	1.35896	21.4385	-3.97294	0.000213928	0.00803986	Neurog3	10
ENSMUSG00000025743	1728.7	1731.45	1740.32	1384.57	949.764	1257.38	1733.49	1197.24	0.534775	0.000215614	0.00807757	Sdc3	4
ENSMUSG00000004415	895.312	755.47	1002.72	624.433	529.092	645.116	884.499	599.547	0.561379	0.000215825	0.00807757	Col26a1	5
ENSMUSG00000025020	57.7282	39.5534	49.1737	18.3657	7.80628	17.9199	48.8184	14.6973	1.74327	0.000217518	0.00812411	Slit1	19
ENSMUSG00000050197	14.6945	24.7209	31.0008	85.7065	96.2775	35.8398	23.472	72.6079	-1.63155	0.000218976	0.0081617	Rhox13	X
ENSMUSG00000057722	450.28	412.344	470.357	279.567	289.7	319.571	444.327	296.279	0.584457	0.000222559	0.00827817	Lepr	4
ENSMUSG00000030652	494.364	398.501	563.359	655.043	826.598	729.738	485.408	737.126	-0.604053	0.000223795	0.00830706	Coq7	7
ENSMUSG00000033762	239.31	202.711	194.557	326.501	458.836	289.705	212.193	358.347	-0.757815	0.000226726	0.00838358	Recql4	15
ENSMUSG00000039055	229.863	230.399	213.799	405.065	364.293	299.66	224.687	356.34	-0.665092	0.000226784	0.00838358	Eme1	11
ENSMUSG00000021758	398.85	787.113	469.288	1308.05	3240.47	1490.34	551.75	2012.95	-1.8672	0.00023242	0.00857439	Ddx4	13
ENSMUSG00000079259	108.109	269.952	189.212	569.336	967.112	448.993	189.091	661.814	-1.80723	0.000233804	0.00860788	Trim71	9
ENSMUSG00000028702	408.296	433.11	456.46	694.835	769.352	521.668	432.622	661.952	-0.6144	0.000235994	0.00867087	Rad54l	4
ENSMUSG00000070407	250.855	303.572	317.491	178.555	137.911	202.097	290.64	172.854	0.752144	0.000236736	0.00868046	Hs3st3b1	11
ENSMUSG00000055322	2872.77	3692.31	3084.05	2270.2	2191.83	2511.77	3216.37	2324.6	0.468696	0.00023843	0.00871659	Tns1	1
ENSMUSG00000061633	0	11.866	2.13799	19.386	56.3787	26.8798	4.668	34.2148	-2.85763	0.000238685	0.00871659	1700029P11Rik	15
ENSMUSG00000026568	893.213	790.079	1030.51	1165.2	1473.65	1281.27	904.601	1306.71	-0.531418	0.000239604	0.00873249	Mpc2	1
ENSMUSG00000095082	0	2.96651	1.06899	6.1219	39.0314	16.9243	1.34517	20.6925	-3.9265	0.000248213	0.00902806	Gm15091	X
ENSMUSG00000026697	304.385	240.287	203.109	136.722	162.197	132.408	249.26	143.776	0.792213	0.000249736	0.0090652	Myoc	1
ENSMUSG00000055407	153.242	165.135	161.418	307.115	259.342	226.985	159.932	264.481	-0.725085	0.000250495	0.00907456	Map6	7
ENSMUSG00000027111	2129.65	2024.15	1849.36	2869.13	2571.74	2606.35	2001.05	2682.4	-0.422583	0.000251733	0.00910115	Itga6	2
ENSMUSG00000042489	730.525	643.732	731.191	940.731	1202.17	913.914	701.816	1018.94	-0.538921	0.000253847	0.00915927	Clspn	4
ENSMUSG00000021477	33080.4	34351.1	35037.3	27296.5	21698	27191.4	34156.3	25395.3	0.427628	0.000257457	0.00927101	Ctsl	13
ENSMUSG00000114003	1475.74	1462.49	1499.8	1030.52	1111.96	1155.83	1479.34	1099.44	0.428027	0.000258084	0.00927511	Gm9616	13
ENSMUSG00000037731	24.1409	26.6985	13.8969	52.0361	91.9406	47.7864	21.5788	63.921	-1.56744	0.000260548	0.00934509	Themis2	4
ENSMUSG00000046794	201.524	290.717	259.765	87.7472	82.3996	193.137	250.669	121.094	1.05217	0.000264959	0.00946541	Ppp1r3b	8
ENSMUSG00000078185	334.824	367.847	302.525	477.508	698.229	445.011	335.065	540.249	-0.690189	0.000265797	0.00946541	Chml	1
ENSMUSG00000089715	2715.33	3037.7	3603.58	2333.46	1948.97	2358.46	3118.87	2213.63	0.494828	0.000265827	0.00946541	Cbx6	15
ENSMUSG00000043029	33.5873	22.7432	44.8977	3.06095	7.80628	10.951	33.7428	7.27276	2.20735	0.000265997	0.00946541	Trpv3	11
ENSMUSG00000026090	36.7361	53.3971	40.6217	86.7269	109.288	90.595	43.585	95.5366	-1.13172	0.000268952	0.00955178	2010300C02Rik	1
ENSMUSG00000039676	3.14881	0.988835	3.20698	17.3454	30.3578	14.9332	2.44821	20.8788	-3.10843	0.000269893	0.0095664	Capsl	15
ENSMUSG00000107496	4.19842	2.96651	2.13799	19.386	35.5619	13.9377	3.10097	22.9619	-2.89267	0.000271839	0.0096165	4933431M02Rik	6
ENSMUSG00000024534	525.852	431.132	517.393	326.501	316.588	347.447	491.459	330.179	0.573751	0.000273106	0.00964245	Sncaip	18
ENSMUSG00000006273	1563.91	1661.24	1769.18	2198.78	2383.52	2110.56	1664.78	2230.95	-0.422574	0.000276783	0.00975322	Atp6v1b2	8
ENSMUSG00000033350	636.06	607.145	649.948	430.573	382.508	487.819	631.051	433.633	0.542166	0.000277982	0.00977643	Chst2	9
ENSMUSG00000070691	8.39683	5.93301	4.27597	22.447	53.7766	19.911	6.20194	32.0448	-2.37456	0.000278676	0.00978179	Runx3	4
ENSMUSG00000049521	1042.26	1021.47	965.301	638.718	754.607	772.546	1009.67	721.957	0.483518	0.000280778	0.00983648	Cdc42ep1	15
ENSMUSG00000067780	1422.21	1116.39	1455.97	932.569	836.139	1015.46	1331.53	928.056	0.520956	0.000283838	0.00992446	Pi15	1
ENSMUSG00000026207	591.977	564.625	572.98	419.35	333.068	423.108	576.527	391.842	0.55855	0.000285404	0.00995992	Speg	1
ENSMUSG00000034472	124.903	174.035	198.833	228.551	425.009	272.781	165.924	308.78	-0.898114	0.000286937	0.00999182	Rasd2	8
ENSMUSG00000060445	85.0179	167.113	103.692	278.546	708.637	317.58	118.608	434.921	-1.87451	0.000287801	0.00999182	Sycp2	2
ENSMUSG00000032006	709.532	759.425	640.327	509.138	459.703	508.726	703.095	492.522	0.514472	0.000287976	0.00999182	Pdgfd	9
ENSMUSG00000002346	477.57	708.006	391.252	366.293	253.27	301.651	525.609	307.072	0.777414	0.00029112	0.0100722	Slc25a42	8
ENSMUSG00000079532	4.19842	6.92185	5.34497	25.5079	43.3682	17.9199	5.48841	28.932	-2.3992	0.000291406	0.0100722	Gm6890	X
ENSMUSG00000035284	389.403	356.969	217.006	538.727	720.78	429.082	321.126	562.863	-0.810011	0.000292123	0.0100777	Vps13c	9
ENSMUSG00000079606	11.5456	26.6985	12.8279	44.8939	91.9406	37.8309	17.024	58.2218	-1.77266	0.000296972	0.0102255	Gm595	X
ENSMUSG00000053007	323.278	451.898	349.561	232.632	200.361	263.821	374.912	232.271	0.692791	0.00029861	0.0102473	Creb5	6
ENSMUSG00000031431	795.6	849.409	904.368	1037.66	1572.53	1179.73	849.793	1263.31	-0.572825	0.00029874	0.0102473	Tsc22d3	X
ENSMUSG00000071773	4.19842	8.89952	5.34497	28.5688	37.2967	22.8976	6.14763	29.5877	-2.26283	0.000305453	0.0104577	Rhox1	X
ENSMUSG00000023411	617.167	732.727	832.746	474.447	423.274	555.517	727.547	484.412	0.58753	0.000306216	0.010464	Nfatc4	14
ENSMUSG00000034173	375.758	334.226	386.976	461.183	762.414	533.614	365.653	585.737	-0.681533	0.000308012	0.0105055	Zbed5	5
ENSMUSG00000070780	96.5636	111.738	91.9334	49.9955	45.9703	49.7775	100.078	48.5811	1.04459	0.00030965	0.0105415	Rbm47	5
ENSMUSG00000034957	1706.66	1654.32	1770.25	1122.35	620.166	1355.94	1710.41	1032.82	0.728573	0.000313578	0.0106552	Cebpa	7
ENSMUSG00000051855	3316.75	2719.3	3339.54	2333.46	2353.16	2266.87	3125.19	2317.83	0.430997	0.000317519	0.0107501	Mest	6
ENSMUSG00000054405	1825.26	1924.27	2180.75	2398.76	3177.16	2707.89	1976.76	2761.27	-0.482568	0.000317562	0.0107501	Dnajc8	4
ENSMUSG00000059493	615.068	546.826	586.877	413.228	410.263	402.202	582.924	408.564	0.512498	0.000318579	0.0107644	Nhs	X
ENSMUSG00000039774	89.2164	119.649	83.3815	151.007	289.7	152.319	97.4156	197.675	-1.02244	0.00032223	0.0108675	Galnt12	4
ENSMUSG00000047242	244.558	298.628	225.558	547.91	1135.38	477.864	256.248	720.385	-1.49148	0.000323088	0.0108755	Taf9b	X
ENSMUSG00000028927	633.961	595.279	365.596	975.422	910.733	704.849	531.612	863.668	-0.699748	0.000324671	0.0108755	Padi2	4
ENSMUSG00000036030	28.3393	37.5757	24.5868	66.3205	143.983	47.7864	30.1673	86.0298	-1.51416	0.00032483	0.0108755	Prtg	9
ENSMUSG00000046711	231.963	439.043	342.078	714.221	1640.19	857.168	337.694	1070.53	-1.66459	0.000324877	0.0108755	Hmga1	17
ENSMUSG00000028776	542.645	484.529	575.118	334.664	301.843	418.131	534.098	351.546	0.604196	0.000326426	0.0109072	Tinagl1	4
ENSMUSG00000051769	6.29763	18.7879	22.4489	39.7923	71.1239	48.7819	15.8448	53.2327	-1.75079	0.000330786	0.0110265	Wfdc15a	2
ENSMUSG00000026950	87.1172	105.805	70.5536	175.494	180.412	136.39	87.8254	164.099	-0.900782	0.000331217	0.0110265	Neb	2
ENSMUSG00000040749	250.855	291.706	330.319	382.618	621.9	429.082	290.96	477.867	-0.717486	0.000338016	0.0112322	Siah1b	X
ENSMUSG00000006494	1044.36	1341.85	1067.92	1559.04	1958.51	1482.37	1151.38	1666.64	-0.533727	0.000339343	0.0112556	Pdk1	2
ENSMUSG00000116295	13.6449	26.6985	11.7589	48.9752	75.4607	40.8175	17.3674	55.0845	-1.66242	0.000340366	0.0112688	Gm32885	15
ENSMUSG00000031026	16.7937	16.8102	10.6899	71.4221	38.164	36.8353	14.7646	48.8072	-1.71984	0.000341488	0.0112853	Trim66	7
ENSMUSG00000022325	403.048	338.182	385.907	688.713	632.309	443.019	375.712	588.014	-0.64677	0.000343767	0.0113399	Pop1	15
ENSMUSG00000051827	4.19842	1.97767	5.34497	22.447	23.4188	23.8932	3.84035	23.253	-2.60774	0.000346299	0.0114026	Rhox2a	X
ENSMUSG00000025287	487.016	459.808	520.6	584.641	993.132	724.76	489.141	767.511	-0.651299	0.000348443	0.0114524	Acot9	X
ENSMUSG00000010277	3323.05	3483.67	3057.32	4750.59	4823.41	3836.85	3288.01	4470.28	-0.44317	0.00035159	0.0115348	2610507B11Rik	11
ENSMUSG00000114865	2.09921	3.95534	3.20698	19.386	46.8377	7.96439	3.08718	24.7294	-3.00438	0.000355078	0.0116282	Gm29776	14
ENSMUSG00000044313	361.064	218.533	198.833	141.824	90.2059	168.248	259.476	133.426	0.962279	0.00036272	0.0118569	Mab21l3	3
ENSMUSG00000020549	457.627	516.172	556.946	695.855	840.476	681.951	510.248	739.428	-0.536047	0.000364011	0.0118777	Elac2	11
ENSMUSG00000054418	11.5456	8.89952	9.62094	33.6704	50.3071	27.8754	10.022	37.2843	-1.90028	0.000367382	0.0119568	2900041M22Rik	11
ENSMUSG00000024989	897.412	777.224	863.747	1140.71	1382.58	1066.23	846.128	1196.51	-0.500701	0.00036776	0.0119568	Cep55	19
ENSMUSG00000000325	295.988	266.985	277.938	344.867	587.206	434.059	280.304	455.377	-0.701908	0.000370871	0.012026	Arvcf	16
ENSMUSG00000053825	59.8274	56.3636	74.8295	23.4673	27.7557	24.8887	63.6735	25.3706	1.32424	0.000371219	0.012026	Ppfia2	10
ENSMUSG00000024180	146.945	150.303	164.625	292.831	315.721	190.15	153.957	266.234	-0.791534	0.000373274	0.0120551	Tmem8	17
ENSMUSG00000023169	965.636	934.449	820.987	385.679	436.284	789.471	907.024	537.145	0.756358	0.000373451	0.0120551	Slc38a1	15
ENSMUSG00000029366	431.387	442.998	552.67	660.144	769.352	657.063	475.685	695.52	-0.549121	0.00037438	0.0120636	Dck	5
ENSMUSG00000053441	619.267	575.502	686.294	478.528	392.916	426.095	627.021	432.513	0.536407	0.000375469	0.0120771	Adamts19	18
ENSMUSG00000037108	362.113	433.11	394.459	497.914	922.876	557.508	396.561	659.433	-0.734847	0.000376524	0.0120878	Zcwpw1	5
ENSMUSG00000032058	679.094	826.666	717.295	981.544	1465.85	948.758	741.018	1132.05	-0.611956	0.000377138	0.0120878	Ppp2r1b	9
ENSMUSG00000109032	27.2897	56.3636	37.4148	82.6456	156.993	68.6929	40.356	102.777	-1.34949	0.000380705	0.0121806	Gm7972	9
ENSMUSG00000034023	534.249	514.194	548.394	737.688	1077.27	657.063	532.279	824.006	-0.631672	0.000382038	0.012199	Fancd2	6
ENSMUSG00000100816	3.14881	0	2.13799	5.10158	49.4398	12.9421	1.76227	22.4945	-3.69864	0.000383284	0.012199	Gm28321	1
ENSMUSG00000032380	29.3889	37.5757	32.0698	52.0361	156.993	64.7107	33.0115	91.2466	-1.47062	0.000383307	0.012199	Dapk2	9
ENSMUSG00000020773	4329.62	5691.73	4755.95	3336.43	2356.63	4045.91	4925.77	3246.33	0.601845	0.000385302	0.012241	Trim47	11
ENSMUSG00000025081	136.449	215.566	110.106	412.208	929.815	347.447	154.04	563.156	-1.87016	0.00038842	0.0123184	Tdrd1	19
ENSMUSG00000020908	8.39683	19.7767	9.62094	49.9955	59.8482	26.8798	12.5982	45.5745	-1.85082	0.00039098	0.0123736	Myh3	11
ENSMUSG00000035834	696.937	859.298	667.052	985.625	1195.23	1008.49	741.096	1063.12	-0.520613	0.000391531	0.0123736	Polr3g	13
ENSMUSG00000000915	109.159	173.046	140.038	224.47	387.712	196.123	140.748	269.435	-0.938128	0.000394577	0.0124481	Hip1r	5
ENSMUSG00000028799	1832.61	2331.67	2195.71	1384.57	1229.92	1771.08	2120	1461.86	0.536711	0.000401917	0.0126576	Zfp362	4
ENSMUSG00000066000	209.921	237.32	262.972	357.111	490.061	311.607	236.738	386.26	-0.70804	0.000402832	0.0126643	Zfp979	4
ENSMUSG00000045349	39.885	44.4976	35.2768	82.6456	124.033	67.6974	39.8864	91.4587	-1.19936	0.000403874	0.012675	Sh2d5	4
ENSMUSG00000038128	12.5953	26.6985	24.5868	55.0971	84.1344	44.7997	21.2935	61.3437	-1.52795	0.00041134	0.012887	Camk4	18
ENSMUSG00000061048	1515.63	1541.59	1553.25	1111.12	1182.22	1192.67	1536.82	1162	0.403191	0.000412759	0.0129088	Cdh3	8
ENSMUSG00000031584	1315.15	1640.48	1455.97	1700.87	2487.6	2192.2	1470.53	2126.89	-0.532634	0.000413826	0.0129088	Gsr	8
ENSMUSG00000033644	234.062	405.422	196.695	871.35	1832.74	604.298	278.726	1102.8	-1.98417	0.00041418	0.0129088	Piwil2	14
ENSMUSG00000037280	36.7361	71.1961	43.8287	94.8894	182.147	84.6217	50.587	120.553	-1.25348	0.000427829	0.0133113	Galnt6	15
ENSMUSG00000079008	11.5456	18.7879	9.62094	28.5688	65.0523	43.8042	13.3182	45.8085	-1.78131	0.000439681	0.0136501	Gm14124	2
ENSMUSG00000043065	618.217	625.933	576.187	766.257	968.846	832.279	606.779	855.794	-0.496716	0.000440754	0.0136501	Spice1	16
ENSMUSG00000018166	72.4227	107.783	72.6915	129.58	186.483	163.27	84.2991	159.778	-0.922048	0.000440983	0.0136501	Erbb3	10
ENSMUSG00000031303	74.5219	81.0845	40.6217	103.052	274.955	104.533	65.4094	160.846	-1.29974	0.000442568	0.0136757	Map3k15	X
ENSMUSG00000038550	55.629	46.4752	39.5528	91.8284	117.962	87.6083	47.219	99.1328	-1.07179	0.00044382	0.013691	Ciart	3
ENSMUSG00000021175	660.201	668.452	408.355	898.898	993.132	804.404	579.003	898.812	-0.634235	0.000454242	0.0139886	Cdca7l	12
ENSMUSG00000021831	554.191	575.502	562.29	702.998	927.213	781.506	563.995	803.906	-0.51218	0.000457034	0.0140507	Ero1l	14
ENSMUSG00000040183	115.456	118.66	106.899	157.129	300.976	180.194	113.672	212.766	-0.907004	0.000460497	0.0141331	Ankrd6	4
ENSMUSG00000028496	257.153	255.119	249.075	367.314	366.028	393.242	253.783	375.528	-0.565066	0.000462041	0.0141565	Mllt3	4
ENSMUSG00000035131	117.556	88.0063	122.934	66.3205	25.1536	51.7686	109.499	47.7476	1.20456	0.000465919	0.0142511	Brinp3	1
ENSMUSG00000039414	558.389	517.161	389.114	1026.44	777.159	574.432	488.221	792.676	-0.698733	0.000472963	0.0144422	Heatr5b	17
ENSMUSG00000039990	656.003	680.319	585.808	882.573	1129.31	794.448	640.71	935.443	-0.546584	0.000474234	0.0144565	Edrf1	7
ENSMUSG00000107879	37.7858	28.6762	28.8628	62.2393	135.309	53.7597	31.7749	83.7693	-1.40367	0.000476288	0.0144947	9330102E08Rik	6
ENSMUSG00000041649	201.524	240.287	168.901	355.07	453.632	247.892	203.571	352.198	-0.791376	0.000484413	0.0147172	Klf8	X
ENSMUSG00000029403	64.0259	97.8947	58.7946	123.458	155.258	148.337	73.5717	142.351	-0.950498	0.000490762	0.0148601	Cdkl2	5
ENSMUSG00000048142	37.7858	44.4976	29.9318	66.3205	113.625	78.6484	37.405	86.1979	-1.20566	0.00049155	0.0148601	Nat8l	5
ENSMUSG00000019849	1255.33	1200.45	1243.24	1572.31	1664.47	1622.75	1233	1619.84	-0.393889	0.000491583	0.0148601	Prep	10
ENSMUSG00000064128	399.899	456.842	405.148	521.381	796.241	602.307	420.63	639.977	-0.606427	0.000494413	0.0149198	Cenpj	14
ENSMUSG00000032826	828.138	774.258	673.466	540.767	477.051	578.414	758.62	532.077	0.512669	0.000495218	0.0149198	Ank2	3
ENSMUSG00000041141	368.411	343.126	329.25	232.632	212.504	245.901	346.929	230.346	0.591865	0.000496034	0.0149198	Pnmal1	7
ENSMUSG00000050700	4906.9	4982.74	4842.54	3563.96	2781.64	4165.38	4910.73	3503.66	0.487342	0.000499342	0.0149944	Emilin3	2
ENSMUSG00000027018	1539.77	1826.38	2027.88	2222.25	3370.58	2378.37	1798.01	2657.06	-0.563825	0.000500328	0.014999	Hat1	2
ENSMUSG00000029648	159.54	187.879	179.591	117.336	95.4101	92.5861	175.67	101.778	0.789182	0.000506461	0.0151578	Flt1	5
ENSMUSG00000074817	5.24802	12.8549	7.48295	24.4876	43.3682	34.8442	8.52861	34.2333	-2.00145	0.000510106	0.0152304	Papolb	5
ENSMUSG00000025878	660.201	622.966	633.913	804.009	1137.98	844.226	639.027	928.739	-0.54043	0.000510573	0.0152304	Uimc1	13
ENSMUSG00000021573	204.673	265.997	235.179	145.905	130.972	155.306	235.283	144.061	0.709574	0.000515715	0.0153513	Tppp	13
ENSMUSG00000006154	22.0417	18.7879	20.3109	32.6501	100.614	51.7686	20.3801	61.6777	-1.60354	0.000516323	0.0153513	Eps8l1	7
ENSMUSG00000000215	14.6945	19.7767	7.48295	39.7923	47.7051	46.7908	13.9847	44.7627	-1.67324	0.000521437	0.0154779	Ins2	7
ENSMUSG00000031963	334.824	220.51	382.7	137.743	191.688	207.074	312.678	178.835	0.804132	0.000523196	0.0155046	Bmper	9
ENSMUSG00000041406	852.279	855.342	792.124	1080.51	1573.4	1038.36	833.248	1230.76	-0.563456	0.000526085	0.0155647	BC055324	1
ENSMUSG00000005370	1935.47	2049.86	2109.12	2501.81	3107.77	2580.46	2031.48	2730.02	-0.426702	0.000528806	0.0156196	Msh6	17
ENSMUSG00000058741	29.3889	25.7097	14.9659	32.6501	117.094	64.7107	23.3548	71.485	-1.61688	0.000532207	0.0156945	Prr19	7
ENSMUSG00000087166	18.8929	13.8437	26.7248	3.06095	2.60209	2.98665	19.8205	2.88323	2.78332	0.00053519	0.0157567	L1td1	4
ENSMUSG00000050394	857.527	765.358	749.364	553.011	431.08	631.178	790.75	538.423	0.555702	0.000539888	0.0158692	Armcx6	X
ENSMUSG00000024081	1371.83	1351.74	1404.66	1691.68	2297.65	1757.14	1376.08	1915.49	-0.477718	0.000541582	0.0158932	Cebpz	17
ENSMUSG00000002289	1623.74	1366.57	1113.89	898.898	782.363	1090.13	1368.07	923.796	0.567064	0.000546826	0.016021	Angptl4	17
ENSMUSG00000074704	34.6369	37.5757	31.0008	49.9955	133.574	76.6573	34.4045	86.7423	-1.33773	0.000549744	0.0160805	Rad21l	2
ENSMUSG00000032511	41.9842	40.5422	35.2768	41.833	185.616	95.5727	39.2677	107.674	-1.45892	0.000551095	0.0160939	Scn5a	9
ENSMUSG00000020836	65.0755	73.1738	58.7946	35.7111	16.4799	25.8843	65.6813	26.0251	1.34507	0.000556573	0.0162277	Coro6	11
ENSMUSG00000072930	0	4.94418	1.06899	2.04063	45.9703	25.8843	2.00439	24.6317	-3.60122	0.000573374	0.0166742	Gm15107	X
ENSMUSG00000025791	806.096	880.063	881.919	1083.58	1260.28	1134.93	856.026	1159.59	-0.438301	0.000573731	0.0166742	Pgm2	4
ENSMUSG00000103408	2.09921	8.89952	1.06899	19.386	37.2967	19.911	4.02257	25.5312	-2.6505	0.00057601	0.0167135	Gm37933	3
ENSMUSG00000029730	3232.78	2972.44	3261.5	4315.94	4703.72	3661.63	3155.57	4227.1	-0.42197	0.000582325	0.0168697	Mcm7	5
ENSMUSG00000015869	1546.07	1878.79	1746.74	2164.09	2364.44	2364.43	1723.86	2297.65	-0.414482	0.000588483	0.0170208	Prpsap1	11
ENSMUSG00000069170	36.7361	39.5534	29.9318	59.1783	98.0122	84.6217	35.4071	80.6041	-1.188	0.000595593	0.0171989	Adgrv1	13
ENSMUSG00000054994	11.5456	18.7879	16.0349	33.6704	91.9406	31.8576	15.4561	52.4896	-1.76782	0.000599785	0.0172924	AV320801	X
ENSMUSG00000017737	213.07	200.734	85.5195	57.1377	98.0122	74.6662	166.441	76.6054	1.11703	0.000603114	0.0173606	Mmp9	2
ENSMUSG00000033799	1235.38	1367.56	832.746	1548.84	2256.88	1541.11	1145.23	1782.28	-0.638207	0.000606727	0.017414	Fam208b	13
ENSMUSG00000021904	367.361	275.885	354.906	245.896	175.208	204.088	332.717	208.397	0.676349	0.000606895	0.017414	Sema3g	14
ENSMUSG00000079626	1.0496	10.8772	4.27597	29.5892	26.0209	28.8709	5.40092	28.1603	-2.36787	0.000615588	0.0176355	Rhox7b	X
ENSMUSG00000032598	564.687	611.1	642.465	402.004	405.927	472.886	606.084	426.939	0.505802	0.000617057	0.0176496	Nckipsd	9
ENSMUSG00000054079	602.473	654.609	720.501	810.131	1177.01	900.972	659.194	962.706	-0.547372	0.000621855	0.0177587	Utp18	11
ENSMUSG00000073568	45.133	69.2185	66.2776	98.9706	258.475	82.6306	60.2097	146.692	-1.28777	0.000625019	0.0178126	Arl14epl	18
ENSMUSG00000036352	923.652	914.672	1051.89	1215.2	1409.47	1288.24	963.405	1304.3	-0.437649	0.000625713	0.0178126	Ubac1	2
ENSMUSG00000027510	475.471	535.949	422.252	624.433	1003.54	623.214	477.891	750.396	-0.651788	0.000633947	0.0179972	Rbm38	2
ENSMUSG00000027463	1282.62	1228.13	1134.2	1837.59	1509.21	1580.93	1214.98	1642.58	-0.434621	0.000634188	0.0179972	Slc52a3	2
ENSMUSG00000040950	17.8433	9.88835	8.55195	23.4673	69.3892	38.8264	12.0945	43.8943	-1.86572	0.000638582	0.0180935	Mgl2	11
ENSMUSG00000064370	59536.7	53554.3	51133.2	66104.2	85414.6	68790.5	54741.4	73436.4	-0.423878	0.000640412	0.0181022	mt-Cytb	MT
ENSMUSG00000028391	98.6628	110.75	79.1055	173.454	195.157	143.359	96.1726	170.657	-0.827273	0.000640891	0.0181022	Wdr31	4
ENSMUSG00000052928	687.491	873.141	782.503	584.641	425.009	582.396	781.045	530.682	0.559094	0.00064236	0.0181154	Ctif	18
ENSMUSG00000062995	86.0676	88.9952	101.554	146.925	244.597	132.408	92.2057	174.643	-0.92491	0.000646786	0.0182118	Ica1	6
ENSMUSG00000026098	228.814	220.51	187.074	322.42	384.243	285.723	212.133	330.795	-0.641841	0.000651043	0.0182527	Pms1	1
ENSMUSG00000020255	1173.46	1129.25	1185.51	1432.52	1903	1485.36	1162.74	1606.96	-0.467458	0.000651247	0.0182527	D10Wsu102e	10
ENSMUSG00000027855	74.5219	251.164	131.486	421.39	945.427	509.721	152.391	625.513	-2.03698	0.000651268	0.0182527	Sycp1	3
ENSMUSG00000092203	857.527	678.341	811.366	539.747	598.482	523.659	782.411	553.963	0.497166	0.000656093	0.0183594	1110038B12Rik	17
ENSMUSG00000028577	1872.49	2199.17	2053.54	2492.63	3362.77	2617.3	2041.73	2824.23	-0.468331	0.000657417	0.018368	Plaa	4
ENSMUSG00000004667	1286.81	1212.31	1476.28	1838.61	2184.89	1567.99	1325.14	1863.83	-0.492694	0.000660614	0.0184289	Polr2e	10
ENSMUSG00000041642	1004.47	1110.46	1096.79	860.126	666.136	792.457	1070.57	772.907	0.470996	0.000664592	0.0185113	Kif21b	1
ENSMUSG00000027173	59.8274	72.185	102.623	118.357	262.811	122.453	78.2119	167.874	-1.1059	0.000670536	0.0186481	Depdc7	2
ENSMUSG00000029361	20.9921	28.6762	17.1039	52.0361	60.7155	58.7374	22.2574	57.163	-1.35799	0.000680212	0.0188882	Nos1	5
ENSMUSG00000078190	2187.38	1790.78	1675.11	1465.17	1419.88	1143.89	1884.42	1342.98	0.488549	0.000683332	0.0189457	Dnm3os	1
ENSMUSG00000109764	68.2243	72.185	120.796	29.5892	19.9494	53.7597	87.0685	34.4327	1.34339	0.000684965	0.0189619	Klkb1	8
ENSMUSG00000029656	7.34723	9.88835	3.20698	16.3251	46.8377	30.862	6.81419	31.3416	-2.19892	0.000687152	0.0189933	C8b	4
ENSMUSG00000001674	1072.7	1196.49	1271.03	1463.13	1936.83	1528.17	1180.07	1642.71	-0.47775	0.000697715	0.0192559	Ddx18	1
ENSMUSG00000041245	554.191	673.397	373.079	1136.63	808.384	685.933	533.555	876.983	-0.716009	0.000701898	0.0193418	Wnk3	X
ENSMUSG00000092341	6162.23	8059.01	11802.8	6392.28	4713.26	5744.32	8674.66	5616.62	0.627163	0.000703858	0.0193538	Malat1	19
ENSMUSG00000078653	8.39683	4.94418	5.34497	28.5688	31.2251	21.9021	6.22866	27.232	-2.13195	0.000704568	0.0193538	Cntd1	11
ENSMUSG00000018209	1392.82	1485.23	1337.31	1949.82	2113.77	1646.64	1405.12	1903.41	-0.438055	0.000705547	0.0193538	Stk4	2
ENSMUSG00000094685	1.0496	1.97767	3.20698	7.14221	53.7766	5.9733	2.07808	22.2974	-3.43496	0.000719304	0.0196991	Gm5900	7
ENSMUSG00000051343	1189.2	1172.76	1043.34	790.745	772.822	927.852	1135.1	830.473	0.45128	0.000720314	0.0196991	Rab11fip5	6
ENSMUSG00000030491	22.0417	83.0621	43.8287	157.129	321.792	157.297	49.6442	212.073	-2.09401	0.000731522	0.0199475	Tdrd12	7
ENSMUSG00000028683	426.139	359.936	420.114	555.052	666.136	524.654	402.063	581.947	-0.534863	0.000731603	0.0199475	Eif2b3	4
ENSMUSG00000060098	714.781	754.481	757.916	936.65	1299.31	944.776	742.393	1060.25	-0.514997	0.000734178	0.0199876	Prmt7	8
ENSMUSG00000030254	625.564	618.022	572.98	775.44	885.579	819.337	605.522	826.785	-0.44969	0.00074536	0.0202119	Rad18	6
ENSMUSG00000008682	20734.9	19735.2	20325.8	15710.8	15873.6	16801.9	20265.3	16128.8	0.329375	0.000745766	0.0202119	Rpl10	X
ENSMUSG00000107709	4.19842	7.91068	5.34497	27.5485	51.1745	10.951	5.81802	29.8914	-2.3619	0.000745772	0.0202119	9430018G01Rik	6
ENSMUSG00000029014	930.999	1049.15	1252.86	1362.12	2131.11	1383.81	1077.67	1625.68	-0.593809	0.000749381	0.0202793	Dnajc2	5
ENSMUSG00000072774	77.6707	48.4529	94.0714	80.605	300.108	147.341	73.3983	176.018	-1.26643	0.000750715	0.020285	Zfp951	5
ENSMUSG00000031241	4.19842	26.6985	13.8969	68.3612	42.5009	43.8042	14.9313	51.5554	-1.77913	0.000752574	0.0203049	Tbx22	X
ENSMUSG00000037759	82.9187	95.917	57.7256	39.7923	24.2862	38.8264	78.8538	34.3017	1.2081	0.00076501	0.0206097	Ptger2	14
ENSMUSG00000047022	153.242	178.979	151.797	240.795	324.394	223.999	161.339	263.063	-0.706535	0.000766319	0.0206142	Mipol1	12
ENSMUSG00000005470	329.576	313.461	416.907	452	659.197	510.717	353.315	540.638	-0.615496	0.000772546	0.0207508	Asf1b	8
ENSMUSG00000007379	141.697	147.336	98.3474	206.104	337.405	173.226	129.127	238.911	-0.889092	0.0007807	0.0209387	Dennd2c	3
ENSMUSG00000052371	113.357	97.8947	96.2094	53.0564	55.5113	50.773	102.487	53.1136	0.94728	0.000788672	0.0211212	Hoxd3os1	2
ENSMUSG00000050050	22.0417	41.5311	18.1729	53.0564	127.503	50.773	27.2485	77.1107	-1.50078	0.000792046	0.0211802	Ccdc158	5
ENSMUSG00000020848	671.747	907.751	772.882	486.691	463.173	641.134	784.126	530.332	0.565116	0.000795527	0.0212419	Doc2b	11
ENSMUSG00000036928	120.704	272.918	200.971	524.442	1160.53	433.064	198.198	706.013	-1.83279	0.000804034	0.0214374	Stag3	5
ENSMUSG00000040728	66.1251	214.577	103.692	366.293	749.403	383.286	128.132	499.661	-1.96293	0.000808271	0.0215186	Esrp1	4
ENSMUSG00000012123	14.6945	20.7655	13.8969	39.7923	92.808	27.8754	16.4523	53.4919	-1.70387	0.000826849	0.0219808	Crybg2	4
ENSMUSG00000031478	92.3652	77.1291	109.037	138.763	220.311	149.332	92.8439	169.469	-0.872151	0.000829869	0.0220287	Nek3	8
ENSMUSG00000022849	201.524	235.343	209.523	308.135	466.642	279.749	215.463	351.509	-0.707683	0.000831936	0.0220512	Hspbap1	16
ENSMUSG00000049608	47.2322	48.4529	43.8287	159.169	100.614	58.7374	46.5046	106.174	-1.18958	0.000848855	0.0224667	Gpr55	1
ENSMUSG00000022557	749.417	700.095	837.022	1074.39	1170.07	922.874	762.178	1055.78	-0.470841	0.000854034	0.0225707	Bop1	15
ENSMUSG00000024556	2145.39	1768.04	1846.15	2505.9	2753.88	2392.3	1919.86	2550.69	-0.410167	0.0008631	0.022777	Me2	18
ENSMUSG00000001630	586.729	634.832	540.911	810.131	1065.12	705.844	587.491	860.366	-0.551045	0.000869689	0.0229174	Stk38l	6
ENSMUSG00000041378	379.957	370.813	437.218	244.876	296.639	262.825	395.996	268.113	0.560928	0.00087698	0.0230452	Cldn5	16
ENSMUSG00000044863	822.89	730.749	605.05	1107.04	1124.1	867.123	719.563	1032.76	-0.521414	0.000877088	0.0230452	Defb36	2
ENSMUSG00000025420	30.4385	27.6874	23.5179	48.9752	75.4607	69.6885	27.2146	64.7081	-1.25125	0.00088785	0.0232941	Katnal2	18
ENSMUSG00000040721	556.29	568.58	434.011	385.679	342.609	342.469	519.627	356.919	0.542809	0.000891853	0.0233596	Zfhx2	14
ENSMUSG00000038201	162.689	135.47	156.073	97.9503	47.7051	91.5905	151.411	79.082	0.942419	0.000892928	0.0233596	Kcna7	7
ENSMUSG00000040841	1428.51	1453.59	1496.59	1173.36	860.426	1137.91	1459.56	1057.23	0.466074	0.000896308	0.0234141	Six5	7
ENSMUSG00000082088	19.9425	20.7655	21.3799	44.8939	67.6544	47.7864	20.696	53.4449	-1.37199	0.000900376	0.0234864	Gm15753	5
ENSMUSG00000023232	303.336	227.432	306.801	192.84	165.667	173.226	279.19	177.244	0.655667	0.000904863	0.0235695	Serinc2	4
ENSMUSG00000049804	1440.06	1369.54	1477.35	1201.93	890.783	1039.35	1428.98	1044.02	0.45352	0.00091735	0.0238603	Armcx4	X
ENSMUSG00000014226	1786.43	1930.21	2283.37	2371.21	3450.38	2670.06	2000	2830.55	-0.501485	0.000922257	0.0239535	Cacybp	1
ENSMUSG00000026496	2939.94	2955.63	2905.52	3494.58	4123.45	3732.31	2933.7	3783.45	-0.367164	0.000926446	0.0240278	Parp1	1
ENSMUSG00000006678	1088.44	1012.57	1011.27	1359.06	1477.99	1281.27	1037.42	1372.77	-0.404462	0.000938689	0.0243104	Pola1	X
ENSMUSG00000095440	298.088	345.103	260.834	221.409	146.585	196.123	301.342	188.039	0.683643	0.000943685	0.0244048	Fignl2	15
ENSMUSG00000022471	977.182	861.275	969.577	1139.69	1642.79	1208.6	936.011	1330.36	-0.508107	0.000949705	0.0245254	Xrcc6	15
ENSMUSG00000020387	173.185	319.394	196.695	350.989	535.164	318.576	229.758	401.576	-0.805609	0.00095121	0.0245293	Jade2	11
ENSMUSG00000050105	82.9187	77.1291	96.2094	42.8533	32.9599	47.7864	85.4191	41.1998	1.05523	0.000954596	0.0245815	Grrp1	4
ENSMUSG00000033788	364.213	265.997	362.389	242.835	167.401	213.048	330.866	207.761	0.672844	0.000962038	0.0247379	Dysf	6
ENSMUSG00000022577	301.236	170.08	265.11	121.418	134.442	168.248	245.475	141.369	0.795362	0.000964663	0.0247702	Ly6h	15
ENSMUSG00000042724	12.5953	39.5534	25.6558	53.0564	156.993	37.8309	25.9348	82.6268	-1.67294	0.000966779	0.0247893	Map3k9	12
ENSMUSG00000002985	5119.97	4765.2	4149.83	3800.68	2617.71	3617.83	4678.33	3345.4	0.484125	0.000971527	0.0248758	Apoe	7
ENSMUSG00000042708	22.0417	53.3971	38.4838	58.158	143.983	81.635	37.9742	94.5919	-1.31783	0.000973357	0.0248874	Shcbp1l	1
ENSMUSG00000034463	326.427	332.249	279.007	490.772	491.796	392.246	312.561	458.271	-0.55204	0.000982131	0.0250266	Scara3	14
ENSMUSG00000024044	537.397	934.449	507.772	945.833	1249.87	960.705	659.873	1052.14	-0.672758	0.000984026	0.0250266	Epb41l3	17
ENSMUSG00000034591	59.8274	35.5981	66.2776	92.8488	156.126	92.5861	53.901	113.853	-1.08453	0.000984286	0.0250266	Slc41a2	10
ENSMUSG00000038119	2785.65	2257.51	2099.5	1531.49	1469.32	2035.9	2380.89	1678.9	0.504205	0.000985437	0.0250266	Cdon	9
ENSMUSG00000020717	843.882	752.503	828.47	648.921	559.45	564.476	808.285	590.949	0.452172	0.000985723	0.0250266	Pecam1	11
ENSMUSG00000032323	4817.68	3098.02	3650.61	2086.55	2745.21	3044.39	3855.44	2625.38	0.554203	0.000988942	0.0250731	Cyp11a1	9
ENSMUSG00000005087	389.403	388.612	623.223	329.562	245.464	300.656	467.079	291.894	0.678904	0.000999263	0.0252993	Cd44	2
ENSMUSG00000040136	20.9921	23.732	27.7938	57.1377	130.972	28.8709	24.1727	72.3269	-1.58634	0.00100349	0.0253707	Abcc8	7
ENSMUSG00000063810	504.86	603.189	404.079	766.257	809.251	646.112	504.043	740.54	-0.554667	0.00100789	0.0254464	Alms1	6
ENSMUSG00000039183	600.374	456.842	540.911	722.384	866.497	690.911	532.709	759.931	-0.513679	0.00101302	0.0255403	Nubp2	17
ENSMUSG00000031962	20.9921	31.6427	36.3458	43.8736	120.564	65.7063	29.6602	76.7145	-1.37556	0.00101773	0.0256083	Cdh15	8
ENSMUSG00000021095	24.1409	44.4976	45.9667	7.14221	3.46946	18.9154	38.2017	9.84237	1.97003	0.00101855	0.0256083	Gsc	12
ENSMUSG00000042700	653.903	701.084	500.289	894.817	1120.64	747.658	618.425	921.037	-0.574933	0.00102107	0.025636	Sipa1l1	12
ENSMUSG00000049103	55.629	59.3301	62.0016	29.5892	23.4188	21.9021	58.9869	24.97	1.24227	0.00102447	0.0256677	Ccr2	9
ENSMUSG00000029777	1532.42	1498.09	1959.46	2067.16	2497.14	2261.89	1663.32	2275.4	-0.452478	0.00102517	0.0256677	Gars	6
ENSMUSG00000037151	152.193	118.66	165.694	218.348	220.311	266.807	145.516	235.155	-0.69338	0.00104908	0.0262299	Lrrc20	10
ENSMUSG00000109176	10.496	2.96651	7.48295	25.5079	30.3578	29.8665	6.98183	28.5774	-2.04157	0.00105058	0.0262311	Zfp264	7
ENSMUSG00000024151	1288.91	1498.09	1486.97	1637.61	2154.53	2029.93	1424.66	1940.69	-0.446234	0.00105346	0.0262666	Msh2	17
ENSMUSG00000022177	625.564	549.792	668.121	970.32	873.436	742.68	614.492	862.145	-0.488875	0.00106045	0.0264047	Haus4	14
ENSMUSG00000031976	327.477	437.065	268.317	571.377	578.532	447.002	344.286	532.304	-0.627904	0.00107046	0.0266171	Urb2	8
ENSMUSG00000015880	1046.46	927.527	999.509	1165.2	1596.82	1338.02	991.164	1366.68	-0.464233	0.00107482	0.0266888	Ncapg	5
ENSMUSG00000079350	24.1409	58.3413	29.9318	93.8691	111.89	61.7241	37.4713	89.1611	-1.24811	0.00107678	0.0267009	Magea8	X
ENSMUSG00000091475	428.239	398.501	459.667	311.196	268.016	313.598	428.802	297.603	0.527752	0.00108035	0.0267528	2810468N07Rik	17
ENSMUSG00000022938	2.09921	10.8772	10.6899	30.6095	56.3787	16.9243	7.88878	34.6375	-2.13619	0.00108896	0.0269291	Fam3b	16
ENSMUSG00000061082	141.697	177.001	145.383	271.404	206.433	264.816	154.694	247.551	-0.675778	0.00109385	0.0270131	Plac1	X
ENSMUSG00000094497	27.2897	14.8325	13.8969	27.5485	167.401	23.8932	18.673	72.9477	-1.97153	0.00110767	0.0273171	Gm8210	1
ENSMUSG00000027102	1401.22	1425.9	1659.08	1174.38	1105.02	1112.03	1495.4	1130.48	0.4036	0.00111184	0.0273824	Hoxd8	2
ENSMUSG00000028132	12.5953	18.7879	10.6899	27.5485	70.2565	36.8353	14.0244	44.8801	-1.67948	0.0011198	0.0275316	Tmem56	3
ENSMUSG00000082450	257.153	310.494	267.248	413.228	486.592	350.433	278.299	416.751	-0.583108	0.00112139	0.0275316	Mageb7-ps	X
ENSMUSG00000037426	514.306	559.681	475.702	801.968	761.546	619.232	516.563	727.582	-0.493944	0.00112246	0.0275316	Depdc5	5
ENSMUSG00000059775	133.3	180.957	316.422	106.113	71.9913	137.386	210.226	105.163	1.00135	0.00114646	0.028082	Rps26-ps1	8
ENSMUSG00000037447	136.449	130.526	116.52	214.266	257.607	166.257	127.832	212.71	-0.736092	0.00115109	0.0281574	Arid5a	1
ENSMUSG00000028647	479.669	550.781	520.6	646.88	958.438	669.009	517.017	758.109	-0.553189	0.00115268	0.028158	Mycbp	4
ENSMUSG00000006527	568.886	586.379	605.05	812.172	967.112	694.893	586.772	824.725	-0.491958	0.0011599	0.0282962	Sfmbt1	14
ENSMUSG00000032999	39.885	58.3413	14.9659	108.153	294.037	126.435	37.7307	176.208	-2.22263	0.00116819	0.0284601	Nlrp4f	13
ENSMUSG00000051900	0	4.94418	7.48295	14.2844	39.0314	20.9065	4.14238	24.7408	-2.58374	0.0011751	0.0285899	Abca16	7
ENSMUSG00000003038	6970.42	5743.15	8031.35	4417.97	6027.32	4125.56	6914.97	4856.95	0.509437	0.00118304	0.0287444	Hmgn2	4
ENSMUSG00000040732	80.8195	111.738	126.141	167.332	344.344	131.413	106.233	214.363	-1.01559	0.00119158	0.028913	Erg	16
ENSMUSG00000041488	154.292	147.336	205.247	254.059	376.436	222.007	168.958	284.167	-0.752917	0.00119869	0.0290466	Stx3	19
ENSMUSG00000028519	13.6449	33.6204	42.7597	64.2799	90.2059	67.6974	30.0083	74.0611	-1.30536	0.00120843	0.0292433	Dab1	4
ENSMUSG00000041431	2292.34	2051.83	2318.65	2648.74	3591.76	2794.51	2220.94	3011.67	-0.439816	0.0012147	0.0293315	Ccnb1	13
ENSMUSG00000006587	7.34723	27.6874	12.8279	34.6907	105.818	29.8665	15.9542	56.7919	-1.83093	0.00121532	0.0293315	Snai3	8
ENSMUSG00000032089	64.0259	97.8947	49.1737	146.925	141.38	116.479	70.3647	134.928	-0.936367	0.0012213	0.029414	Il10ra	9
ENSMUSG00000097258	26.2401	25.7097	19.2419	66.3205	78.0628	36.8353	23.7306	60.4062	-1.3492	0.00122226	0.029414	Gm26767	9
ENSMUSG00000021311	1450.55	1606.86	1377.93	2064.1	1990.6	1780.04	1478.45	1944.91	-0.395461	0.00122362	0.029414	Mtr	13
ENSMUSG00000017733	95.514	53.3971	59.8636	147.946	114.492	133.404	69.5916	131.947	-0.922924	0.00123135	0.0295607	Eppin	2
ENSMUSG00000097124	514.306	529.027	385.907	361.192	302.71	303.643	476.413	322.515	0.564059	0.00123494	0.0296074	A530020G20Rik	3
ENSMUSG00000027353	417.743	389.601	467.15	538.727	659.197	594.343	424.831	597.422	-0.493092	0.00125014	0.029919	Mcm8	2
ENSMUSG00000007833	561.538	514.194	521.669	687.693	735.525	733.72	532.467	718.979	-0.433586	0.00125267	0.029919	Aldh16a1	7
ENSMUSG00000030528	638.159	581.435	555.877	754.013	910.733	771.551	591.824	812.099	-0.457209	0.00125534	0.029919	Blm	7
ENSMUSG00000078867	9.44644	2.96651	3.20698	21.4266	39.8988	15.9288	5.20664	25.7514	-2.31498	0.00125644	0.029919	Gm14418	2
ENSMUSG00000022191	979.281	1176.71	1142.75	1324.37	1738.2	1451.51	1099.58	1504.69	-0.452927	0.00125651	0.029919	Drosha	15
ENSMUSG00000020929	1571.26	1755.18	1816.22	2120.22	2549.18	2135.45	1714.22	2268.28	-0.404373	0.0012608	0.029919	Eftud2	11
ENSMUSG00000040938	28.3393	63.2854	33.1388	62.2393	155.258	84.6217	41.5879	100.706	-1.27608	0.00126095	0.029919	Slc16a11	11
ENSMUSG00000025955	12055.8	12405.9	10908	7854.39	10171.6	8919.13	11789.9	8981.7	0.392407	0.00126118	0.029919	Akr1cl	1
ENSMUSG00000028630	733.673	803.923	793.193	561.174	502.204	633.169	776.93	565.516	0.459111	0.001266	0.029994	Dyrk2	10
ENSMUSG00000030144	66.1251	79.1068	39.5528	25.5079	20.8168	28.8709	61.5949	25.0652	1.30227	0.00126955	0.0300388	Clec4d	6
ENSMUSG00000002797	140.647	202.711	159.28	220.388	325.262	270.789	167.546	272.146	-0.700318	0.00127472	0.0301216	Ggct	6
ENSMUSG00000022286	25.1905	39.5534	28.8628	53.0564	126.635	54.7552	31.2022	78.149	-1.32732	0.00127949	0.030195	Grhl2	15
ENSMUSG00000031548	4620.36	4982.74	4605.22	3377.25	3575.28	4062.84	4736.11	3671.79	0.367279	0.00128196	0.0302138	Sfrp1	8
ENSMUSG00000053332	3479.44	3481.69	3675.2	2654.86	3045.32	2522.72	3545.44	2740.97	0.37098	0.00128964	0.0303231	Gas5	1
ENSMUSG00000045216	2054.08	2267.4	1917.77	1564.14	1073.8	1721.3	2079.75	1453.08	0.518006	0.00129128	0.0303231	Hs6st1	1
ENSMUSG00000055723	1614.29	1744.3	1721.08	2203.88	2449.44	1999.06	1693.23	2217.46	-0.389376	0.00129163	0.0303231	Rras2	7
ENSMUSG00000110344	59.8274	83.0621	117.589	136.722	207.3	145.35	86.8263	163.124	-0.912709	0.00129406	0.0303407	Gm45716	11
ENSMUSG00000026229	2382.6	2319.81	2267.33	2733.43	3244.81	2999.59	2323.25	2992.61	-0.365478	0.00130417	0.0305382	Psmd1	1
ENSMUSG00000031125	33.5873	24.7209	12.8279	49.9955	71.1239	59.733	23.712	60.2841	-1.34645	0.00131598	0.0307748	3830403N18Rik	X
ENSMUSG00000035517	389.403	391.579	373.079	570.357	654.86	449.988	384.687	558.402	-0.538464	0.00131948	0.0307895	Tdrd7	4
ENSMUSG00000039759	366.312	368.835	404.079	266.302	259.342	270.789	379.742	265.478	0.516512	0.00132001	0.0307895	Thap3	4
ENSMUSG00000019558	1277.37	1460.51	1374.73	1053.99	892.518	1118	1370.87	1021.5	0.425137	0.00133118	0.0310101	Slc6a8	X
ENSMUSG00000073968	318.03	399.489	349.561	611.169	468.377	476.868	355.693	518.805	-0.54328	0.00134255	0.0312347	Trim68	7
ENSMUSG00000009628	429.288	744.593	331.388	1049.91	2311.53	1170.77	501.756	1510.73	-1.59013	0.00134616	0.0312783	Tex15	8
ENSMUSG00000061119	715.83	691.196	607.188	427.512	463.173	546.557	671.405	479.081	0.487171	0.00135358	0.0314105	Prcp	7
ENSMUSG00000074793	564.687	593.301	748.295	485.67	361.691	461.935	635.428	436.432	0.543	0.00135948	0.0315069	Hspa12b	2
ENSMUSG00000032741	2075.07	2419.68	1794.84	1622.3	1210.84	1653.61	2096.53	1495.58	0.48797	0.00136514	0.0315975	Tpcn1	5
ENSMUSG00000030986	976.132	1019.49	829.539	1353.96	1241.2	1191.67	941.72	1262.28	-0.422243	0.00136862	0.0316208	Dhx32	7
ENSMUSG00000022951	1792.72	1519.84	1907.08	1331.51	1228.19	1367.88	1739.88	1309.2	0.410344	0.00136965	0.0316208	Rcan1	16
ENSMUSG00000056749	311.732	558.692	442.563	281.607	246.332	303.643	437.662	277.194	0.66035	0.00137422	0.0316859	Nfil3	13
ENSMUSG00000039410	55.629	73.1738	54.5187	108.153	167.401	87.6083	61.1072	121.054	-0.987933	0.00137612	0.0316894	Prdm16	4
ENSMUSG00000020712	33.5873	24.7209	25.6558	67.3409	84.1344	45.7953	27.988	65.7568	-1.23583	0.00138077	0.0317559	Tcam1	11
ENSMUSG00000078864	15.7441	8.89952	9.62094	34.6907	39.8988	32.8531	11.4215	35.8142	-1.65207	0.00139519	0.0320468	Gm14322	2
ENSMUSG00000057156	291.79	315.438	249.075	444.858	421.539	377.313	285.435	414.57	-0.537769	0.00139744	0.0320577	Homez	14
ENSMUSG00000042660	478.62	370.813	398.735	590.763	706.035	514.699	416.056	603.832	-0.538579	0.00140911	0.032261	Wdr55	18
ENSMUSG00000031093	496.463	567.591	616.809	741.77	875.171	716.796	560.288	777.912	-0.474183	0.00141	0.032261	Dock11	X
ENSMUSG00000042997	319.08	318.405	272.593	501.995	392.916	426.095	303.359	440.336	-0.536239	0.00141165	0.032261	Nhlrc3	3
ENSMUSG00000032175	369.461	402.456	341.009	533.625	528.225	490.806	370.975	517.552	-0.479972	0.00141388	0.0322712	Tyk2	9
ENSMUSG00000023403	180.532	356.969	230.903	504.036	1589.88	656.067	256.135	916.661	-1.83952	0.00142121	0.0323974	Stk31	6
ENSMUSG00000034825	6.29763	27.6874	3.20698	30.6095	68.5218	44.7997	12.3973	47.977	-1.94352	0.001432	0.0326023	Nrip3	7
ENSMUSG00000062760	71.3731	32.6316	44.8977	12.2438	16.4799	23.8932	49.6341	17.539	1.49957	0.00144095	0.0327394	Shisal1	15
ENSMUSG00000073888	250.855	205.678	207.385	133.661	143.115	147.341	221.306	141.373	0.645979	0.00144277	0.0327394	Ccl27a	4
ENSMUSG00000043419	249.806	314.45	345.285	365.273	640.982	439.037	303.18	481.764	-0.669724	0.0014438	0.0327394	Rnf227	11
ENSMUSG00000040666	318.03	306.539	302.525	157.129	235.056	211.056	309.031	201.08	0.617641	0.00144526	0.0327394	Sh3bgr	16
ENSMUSG00000033389	158.49	201.722	210.592	262.221	333.068	282.736	190.268	292.675	-0.622384	0.0014666	0.0331812	Arhgap44	11
ENSMUSG00000037025	14.6945	18.7879	9.62094	2.04063	1.73473	0.995549	14.3678	1.5903	3.17562	0.00150199	0.0339278	Foxa2	2
ENSMUSG00000079349	14.6945	36.5869	20.3109	49.9955	98.8796	44.7997	23.8641	64.5583	-1.43548	0.00150336	0.0339278	Magea5	X
ENSMUSG00000040325	769.36	813.811	669.19	1126.43	1124.97	869.115	750.787	1040.17	-0.470309	0.00151151	0.0340692	Dcaf1	9
ENSMUSG00000025328	29.3889	27.6874	19.2419	49.9955	100.614	43.8042	25.4394	64.8046	-1.35252	0.00151802	0.0341652	Padi3	4
ENSMUSG00000033581	669.648	731.738	813.504	491.792	537.766	582.396	738.296	537.318	0.458185	0.00151998	0.0341652	Igf2bp2	16
ENSMUSG00000028121	709.532	744.593	690.57	562.194	502.204	529.632	714.898	531.343	0.428835	0.00152144	0.0341652	Bcar3	3
ENSMUSG00000086077	113.357	108.772	63.0706	49.9955	49.4398	39.822	95.0666	46.4191	1.03446	0.0015316	0.0343507	Gm14396	2
ENSMUSG00000029838	4765.2	2961.56	4748.47	2923.21	2882.25	2985.65	4158.41	2930.37	0.504839	0.00153481	0.0343801	Ptn	6
ENSMUSG00000022672	635.011	496.395	417.976	823.395	882.977	609.276	516.461	771.883	-0.580115	0.00153845	0.0343829	Prkdc	16
ENSMUSG00000083114	0	2.96651	2.13799	10.2032	30.3578	8.95994	1.7015	16.507	-3.27401	0.00153874	0.0343829	Gm14790	X
ENSMUSG00000031314	1359.24	1351.74	1268.9	1761.07	2252.55	1502.28	1326.62	1838.63	-0.471323	0.00154571	0.0344752	Taf1	X
ENSMUSG00000037275	732.624	728.771	649.948	1005.01	1154.46	800.422	703.781	986.632	-0.487861	0.00154668	0.0344752	Gemin5	11
ENSMUSG00000021392	710.582	881.052	683.087	902.98	1457.17	1002.52	758.24	1120.89	-0.564415	0.00156748	0.0348958	Nol8	13
ENSMUSG00000050071	251.905	240.287	237.317	380.578	326.129	347.447	243.169	351.385	-0.530319	0.00157306	0.0349768	Bex1	X
ENSMUSG00000062353	643.407	727.783	791.055	6539.2	721.647	6471.07	720.748	4577.31	-2.66691	0.00159219	0.0353586	Gm15772	5
ENSMUSG00000029591	870.122	977.958	1008.06	1148.88	1340.08	1297.2	952.047	1262.05	-0.406972	0.00159752	0.0354336	Ung	5
ENSMUSG00000020032	911.057	830.621	901.161	600.966	595.012	743.675	880.946	646.551	0.446576	0.00159969	0.0354382	Nuak1	10
ENSMUSG00000018451	925.751	744.593	980.267	669.327	608.023	652.085	883.537	643.145	0.458115	0.00160935	0.0356085	6330403K07Rik	11
ENSMUSG00000028826	811.344	1056.08	931.093	1190.71	1698.3	1137.91	932.838	1342.31	-0.525476	0.00162256	0.0358569	Maco1	4
ENSMUSG00000005667	614.019	457.831	689.501	819.314	916.804	779.515	587.117	838.544	-0.515321	0.0016429	0.0362309	Mthfd2	6
ENSMUSG00000026414	109.159	117.671	109.037	184.677	194.29	161.279	111.956	180.082	-0.686087	0.00164349	0.0362309	Tnnt2	1
ENSMUSG00000020490	1.0496	9.88835	2.13799	46.9345	15.6126	14.9332	4.35865	25.8268	-2.54667	0.001647	0.036264	Btnl10	11
ENSMUSG00000078137	120.704	126.571	129.348	58.158	63.3176	88.6039	125.541	70.0265	0.843236	0.00166505	0.0366169	Ankrd63	2
ENSMUSG00000028138	4898.5	4785.96	5070.24	3998.62	3768.7	4033.97	4918.23	3933.76	0.322295	0.00166956	0.0366716	Adh5	3
ENSMUSG00000016496	27.2897	29.6651	19.2419	52.0361	111.023	37.8309	25.3989	66.9632	-1.40176	0.00167852	0.0368236	Cd274	19
ENSMUSG00000031442	535.298	547.815	508.841	414.248	369.497	374.327	530.651	386.024	0.459819	0.00168717	0.0369685	Mcf2l	8
ENSMUSG00000115536	3.14881	1.97767	6.41396	17.3454	26.8883	16.9243	3.84681	20.386	-2.41913	0.00171131	0.0374059	Gm32857	14
ENSMUSG00000069053	325.377	424.21	243.73	784.623	1462.38	554.521	331.106	933.84	-1.49593	0.00171205	0.0374059	Uba1y	Y
ENSMUSG00000043439	33.5873	74.1626	75.8985	119.377	147.452	101.546	61.2162	122.792	-1.00489	0.00171334	0.0374059	Epop	11
ENSMUSG00000079184	926.801	952.248	957.818	1145.81	1693.1	1158.82	945.622	1332.58	-0.495651	0.00172142	0.0375368	Mphosph8	14
ENSMUSG00000021703	6229.4	6732.98	5398.42	5124.03	4355.04	4629.3	6120.27	4702.79	0.380252	0.00175097	0.038105	Serinc5	13
ENSMUSG00000109017	1.0496	2.96651	4.27597	14.2844	22.5515	15.9288	2.76403	17.5882	-2.6743	0.00175169	0.038105	Gm38979	7
ENSMUSG00000043811	77.6707	107.783	99.4164	48.9752	26.8883	60.7285	94.9567	45.5307	1.06748	0.00175511	0.0381334	Rtn4r	16
ENSMUSG00000040964	529.001	487.496	525.945	386.7	344.344	387.269	514.147	372.771	0.464535	0.00177946	0.0386161	Arhgef10l	4
ENSMUSG00000021494	746.269	617.033	640.327	874.411	1160.53	804.404	667.876	946.449	-0.503939	0.00179691	0.0389091	Ddx41	13
ENSMUSG00000032076	1064.3	1393.27	946.059	1678.42	1491	1541.11	1134.54	1570.18	-0.468218	0.00179768	0.0389091	Cadm1	9
ENSMUSG00000064345	27209.9	24592.3	21377.7	29716.7	35780.5	30249.8	24393.3	31915.7	-0.387796	0.00179941	0.0389091	mt-Nd2	MT
ENSMUSG00000041134	57.7282	52.4083	60.9326	23.4673	25.1536	26.8798	57.023	25.1669	1.17919	0.00181068	0.039106	Cyyr1	16
ENSMUSG00000056305	820.791	808.867	912.92	1058.07	1236.86	1076.19	847.526	1123.71	-0.407637	0.00181555	0.0391422	Usp39	6
ENSMUSG00000034239	27.2897	41.5311	17.1039	62.2393	109.288	45.7953	28.6416	72.4408	-1.33837	0.00181673	0.0391422	Gm884	11
ENSMUSG00000063060	103.911	83.0621	135.762	64.2799	49.4398	55.7508	107.578	56.4901	0.930375	0.00181885	0.0391422	Sox7	14
ENSMUSG00000073889	1382.33	1371.51	1445.28	1013.17	1195.23	984.598	1399.71	1064.33	0.394459	0.00183877	0.0395158	Il11ra1	4
ENSMUSG00000001829	705.334	702.073	647.81	934.609	991.398	822.324	685.072	916.11	-0.419542	0.00184059	0.0395158	Clpb	7
ENSMUSG00000037892	1196.55	962.136	1077.55	870.33	782.363	760.6	1078.74	804.431	0.423337	0.00184602	0.0395854	Pcdh18	3
ENSMUSG00000022528	738.921	651.642	742.95	567.296	481.387	522.663	711.171	523.782	0.441729	0.00185209	0.0396596	Hes1	16
ENSMUSG00000024269	389.403	299.617	399.804	501.995	699.096	445.011	362.941	548.701	-0.598153	0.00185595	0.0396596	Tpgs2	18
ENSMUSG00000083977	2.09921	0.988835	3.20698	9.18284	32.9599	8.95994	2.09834	17.0342	-3.03992	0.00185606	0.0396596	Mageb8-ps	X
ENSMUSG00000025902	224.615	147.336	228.765	111.214	135.309	113.493	200.239	120.005	0.735699	0.00186176	0.0396908	Sox17	1
ENSMUSG00000067764	7.34723	45.4864	23.5179	94.8894	318.323	96.5683	25.4505	169.927	-2.73817	0.00186191	0.0396908	Xlr5c	X
ENSMUSG00000038187	498.562	590.335	549.463	607.088	974.05	798.431	546.12	793.19	-0.539253	0.00187364	0.0398938	Btbd10	7
ENSMUSG00000021418	329.576	344.115	319.629	394.862	657.462	449.988	331.106	500.771	-0.598363	0.00188677	0.0400879	Rpp40	13
ENSMUSG00000038112	772.509	628.899	767.537	504.036	418.937	599.321	722.982	507.431	0.511504	0.0018883	0.0400879	AW551984	9
ENSMUSG00000017561	735.773	731.738	699.122	852.984	1251.61	929.843	722.211	1011.48	-0.486857	0.00189061	0.0400879	Crlf3	11
ENSMUSG00000040363	721.078	800.956	847.712	605.047	592.41	575.427	789.915	590.962	0.418624	0.00189163	0.0400879	Bcor	X
ENSMUSG00000022994	818.691	974.003	911.851	627.494	525.623	769.56	901.515	640.892	0.493335	0.00190063	0.0402316	Adcy6	15
ENSMUSG00000021718	3.14881	14.8325	10.6899	23.4673	48.5724	31.8576	9.55709	34.6324	-1.85597	0.00190562	0.0402899	4933425L06Rik	13
ENSMUSG00000000276	235.111	287.751	217.006	365.273	505.674	294.683	246.623	388.543	-0.65662	0.00192404	0.0406318	Dgke	11
ENSMUSG00000045092	1010.77	962.136	863.747	794.826	529.96	687.925	945.551	670.903	0.496343	0.00192647	0.0406356	S1pr1	3
ENSMUSG00000038644	1143.02	1013.56	1464.52	1607	1730.39	1605.82	1207.03	1647.74	-0.44952	0.00195124	0.0411102	Pold1	7
ENSMUSG00000036185	119.655	91.9617	134.693	82.6456	46.8377	50.773	115.437	60.0854	0.94528	0.00196259	0.0413012	Sapcd1	17
ENSMUSG00000047879	1594.35	1562.36	1731.77	1940.64	2336.68	2063.77	1629.49	2113.7	-0.375786	0.00197031	0.0414154	Usp14	18
ENSMUSG00000035529	573.084	632.854	560.153	811.151	969.714	683.942	588.697	821.602	-0.481463	0.00198501	0.0416368	Prdm4	10
ENSMUSG00000009894	1254.28	1035.31	1062.58	1458.03	1713.05	1340.01	1117.39	1503.7	-0.428924	0.00198545	0.0416368	Snap47	11
ENSMUSG00000029703	716.88	689.218	693.777	881.553	1039.1	873.097	699.958	931.251	-0.412606	0.00199039	0.0416921	Lrwd1	5
ENSMUSG00000026213	708.483	659.553	665.983	905.02	1036.5	804.404	678.006	915.308	-0.433676	0.00200601	0.0419708	Stk11ip	1
ENSMUSG00000027082	1572.31	1464.46	1453.83	1213.16	1147.52	1142.89	1496.87	1167.86	0.358193	0.00202077	0.0421956	Tfpi	2
ENSMUSG00000006289	860.676	745.582	953.542	1203.97	1090.28	1123.98	853.266	1139.41	-0.417412	0.00202143	0.0421956	Osgep	14
ENSMUSG00000026615	3540.32	3242.39	3111.84	4209.82	5062.81	3780.1	3298.18	4350.91	-0.399846	0.00202439	0.0422086	Eprs	1
ENSMUSG00000021149	1455.8	1778.91	1581.04	1885.54	3132.92	1969.2	1605.25	2329.22	-0.537418	0.00205352	0.0427601	Gtpbp4	13
ENSMUSG00000079845	18.8929	33.6204	25.6558	47.9549	84.1344	53.7597	26.0564	61.9496	-1.25067	0.00205557	0.0427601	Xlr4a	X
ENSMUSG00000005683	1857.8	1904.5	2290.85	2617.11	2668.88	2549.6	2017.72	2611.86	-0.372541	0.00206682	0.0429011	Cs	10
ENSMUSG00000017692	213.07	268.963	315.353	188.758	155.258	169.243	265.795	171.087	0.636704	0.0020671	0.0429011	Rhbdl3	11
ENSMUSG00000039313	290.74	317.416	246.937	203.043	117.962	206.079	285.031	175.694	0.701806	0.00207425	0.0430003	AF529169	9
ENSMUSG00000052516	607.721	568.58	638.189	448.939	359.956	487.819	604.83	432.238	0.485869	0.00209023	0.0432819	Robo2	16
ENSMUSG00000068522	12067.3	16681.6	14304.2	20418.6	17114	19550.6	14351	19027.7	-0.40689	0.00209511	0.0433333	Aard	15
ENSMUSG00000066415	1154.56	1258.79	1287.07	965.219	904.661	983.603	1233.47	951.161	0.375292	0.00209771	0.0433374	Msl2	9
ENSMUSG00000000399	1192.35	1133.2	1248.58	1393.75	1857.9	1524.19	1191.38	1591.94	-0.418833	0.00210579	0.0434547	Ndufa9	6
ENSMUSG00000004100	741.021	754.481	899.023	1015.21	1263.75	989.576	798.175	1089.51	-0.449775	0.00211101	0.0434835	Ppan	9
ENSMUSG00000040345	70.3235	73.1738	76.9675	35.7111	37.2967	36.8353	73.4883	36.6144	1.00452	0.00211199	0.0434835	Arhgap9	10
ENSMUSG00000053070	178.433	221.499	161.418	237.734	366.895	280.745	187.117	295.125	-0.658187	0.00211885	0.0435749	Cfap300	9
ENSMUSG00000037697	598.274	690.207	525.945	931.548	791.037	777.524	604.809	833.37	-0.461603	0.00212553	0.0436628	Ddhd1	14
ENSMUSG00000026134	726.326	603.189	636.051	825.436	976.653	848.208	655.189	883.432	-0.432015	0.00213699	0.0438184	Prim2	1
ENSMUSG00000018861	4010.54	4230.24	4730.3	3293.58	2228.26	3693.49	4323.69	3071.78	0.493482	0.00213796	0.0438184	Fdxr	11
ENSMUSG00000048915	608.77	514.194	694.846	425.472	345.211	486.824	605.937	419.169	0.532397	0.00214375	0.0438875	Efna5	17
ENSMUSG00000008129	53.5298	69.2185	66.2776	101.011	156.993	95.5727	63.0086	117.859	-0.906083	0.00215274	0.0439775	4930432K21Rik	8
ENSMUSG00000028837	1698.26	1481.27	1993.67	2083.49	2458.11	2363.43	1724.4	2301.68	-0.417005	0.00215302	0.0439775	Psmb2	4
ENSMUSG00000085925	112.308	124.593	131.486	60.1986	73.726	77.6528	122.796	70.5258	0.798747	0.00216518	0.0441453	Rtl1	12
ENSMUSG00000021367	361.064	366.858	291.835	424.451	572.461	474.877	339.919	490.596	-0.530019	0.00216611	0.0441453	Edn1	13
ENSMUSG00000038774	584.63	629.888	471.426	736.668	913.335	715.8	561.981	788.601	-0.489036	0.00217214	0.0442183	Ascc3	10
ENSMUSG00000030619	704.284	751.515	818.849	963.178	1340.08	901.968	758.216	1068.41	-0.495699	0.0021808	0.0443192	Eed	7
ENSMUSG00000024966	2076.12	2130.94	2501.44	2846.68	2996.74	2776.59	2236.17	2873.34	-0.361906	0.002182	0.0443192	Stip1	19
ENSMUSG00000029524	353.717	352.025	327.112	227.53	216.841	270.789	344.285	238.387	0.531415	0.00218744	0.0443775	Sirt4	5
ENSMUSG00000027932	2552.64	2778.63	2839.25	2080.42	1544.78	2346.51	2723.5	1990.57	0.452744	0.00218978	0.0443775	Slc27a3	3
ENSMUSG00000032078	630.812	625.933	799.607	862.167	1137.12	877.079	685.451	958.787	-0.485225	0.00219439	0.044421	Zpr1	9
ENSMUSG00000063972	131.201	228.421	152.866	263.242	406.794	216.034	170.829	295.357	-0.790405	0.00219783	0.0444409	Nr6a1	2
ENSMUSG00000000197	135.399	152.281	161.418	226.51	233.321	221.012	149.699	226.948	-0.600639	0.00220207	0.0444768	Nalcn	14
ENSMUSG00000052504	1006.57	728.771	909.713	634.637	670.473	621.223	881.685	642.111	0.456781	0.00220801	0.0445073	Epha3	16
ENSMUSG00000063663	569.935	681.307	404.079	905.02	823.129	707.836	551.774	811.995	-0.556666	0.0022085	0.0445073	Brwd3	X
ENSMUSG00000004356	1256.38	1354.7	1218.65	1865.14	2306.32	1319.1	1276.58	1830.19	-0.520046	0.00223541	0.0449994	Utp20	10
ENSMUSG00000043924	23.0913	49.4418	23.5179	74.4831	94.5427	53.7597	32.017	74.2618	-1.21131	0.00226253	0.0454499	Ncmap	4
ENSMUSG00000083714	2.09921	7.91068	2.13799	10.2032	35.5619	20.9065	4.04929	22.2239	-2.44787	0.00226281	0.0454499	Fthl17-ps1	X
ENSMUSG00000032594	2429.83	2695.56	2475.79	2018.18	1955.04	2052.82	2533.73	2008.68	0.335205	0.00227335	0.0456108	Ip6k1	9
ENSMUSG00000036678	555.241	524.083	529.152	641.779	837.874	714.804	536.158	731.486	-0.449167	0.0022801	0.0456955	Aaas	15
ENSMUSG00000066652	23.0913	14.8325	24.5868	3.06095	6.93892	2.98665	20.8369	4.32884	2.2457	0.00228275	0.0456979	Lefty2	1
ENSMUSG00000030788	690.64	698.118	597.567	811.151	1038.24	854.181	662.108	901.189	-0.445299	0.00229976	0.0459584	Rnf141	7
ENSMUSG00000020282	1560.76	1753.2	1861.12	1363.14	1069.46	1420.65	1725.03	1284.42	0.426104	0.00230411	0.0459584	Rhbdf1	11
ENSMUSG00000086598	38.8354	82.0733	41.6907	78.5643	204.698	86.6128	54.1998	123.292	-1.18648	0.00230429	0.0459584	Btbd18	2
ENSMUSG00000041720	728.425	663.508	628.568	892.776	948.897	836.261	673.501	892.645	-0.406733	0.00230593	0.0459584	Pi4ka	16
ENSMUSG00000024993	529.001	527.049	537.704	681.571	740.729	689.916	531.251	704.072	-0.406787	0.00231	0.0459889	Fam45a	19
ENSMUSG00000095567	1109.43	1333.94	1460.24	1718.21	2010.55	1556.04	1301.21	1761.6	-0.437408	0.00231514	0.0460404	Noc2l	4
ENSMUSG00000050812	2596.72	2822.14	2402.03	3462.95	3531.04	3043.39	2606.96	3345.8	-0.359951	0.00232101	0.0460849	Ecpas	4
ENSMUSG00000032816	2287.09	2266.41	2096.3	1808	1353.96	1823.85	2216.6	1661.93	0.41608	0.00232432	0.0460849	Igdcc4	9
ENSMUSG00000026646	393.602	366.858	434.011	439.756	757.209	584.387	398.157	593.784	-0.578226	0.0023269	0.0460849	Suv39h2	2
ENSMUSG00000041794	17.8433	31.6427	16.0349	51.0158	58.9808	49.7775	21.8403	53.258	-1.28218	0.00232757	0.0460849	Myrip	9
ENSMUSG00000027905	818.691	910.717	880.85	1076.43	1355.69	1066.23	870.086	1166.12	-0.423067	0.00233402	0.0461164	Ddx20	3
ENSMUSG00000045294	1073.75	1042.23	1097.86	1525.37	1944.63	1122.98	1071.28	1530.99	-0.515715	0.00233673	0.0461164	Insig1	5
ENSMUSG00000010080	251.905	229.41	279.007	344.867	362.558	376.318	253.441	361.248	-0.512142	0.00233681	0.0461164	Epn3	11
ENSMUSG00000046714	82.9187	104.817	116.52	164.271	175.208	157.297	101.419	165.592	-0.70801	0.00235685	0.0463874	Foxc2	8
ENSMUSG00000063626	3.14881	6.92185	3.20698	23.4673	26.0209	13.9377	4.42588	21.142	-2.24929	0.00235795	0.0463874	Unc5d	8
ENSMUSG00000087516	44.0834	26.6985	52.3807	19.386	14.7452	7.96439	41.0542	14.0319	1.54734	0.00235825	0.0463874	Tbx3os1	5
ENSMUSG00000021732	38.8354	48.4529	37.4148	15.3047	14.7452	17.9199	41.5677	15.9899	1.38102	0.0023734	0.0466347	Fgf10	13
ENSMUSG00000020075	1902.93	1738.37	1779.87	2401.82	2923.02	1995.08	1807.06	2439.97	-0.433607	0.00237952	0.0467042	Ddx21	10
ENSMUSG00000030609	436.635	384.657	403.01	518.321	693.024	517.686	408.101	576.343	-0.499444	0.00239816	0.0469822	Aen	7
ENSMUSG00000039137	688.54	690.207	594.36	494.853	438.019	518.681	657.703	483.851	0.443921	0.00239888	0.0469822	Whrn	4
ENSMUSG00000024530	100.762	102.839	96.2094	161.21	206.433	132.408	99.9368	166.684	-0.740006	0.00240478	0.0470341	Prelid3a	18
ENSMUSG00000029446	377.858	356.969	337.802	469.345	667.003	435.055	357.543	523.801	-0.552333	0.00240673	0.0470341	Psph	5
ENSMUSG00000004562	1695.11	1797.7	2030.02	1366.2	1256.81	1567.99	1840.94	1397	0.398381	0.00241391	0.0471233	Arhgef40	14
ENSMUSG00000042426	642.358	594.29	699.122	893.797	911.6	780.511	645.256	861.969	-0.418377	0.00241755	0.0471253	Dhx29	13
ENSMUSG00000075028	751.517	782.169	692.708	633.616	459.703	518.681	742.131	537.334	0.467224	0.00242152	0.0471253	Prdm11	2
ENSMUSG00000004892	3365.03	4198.59	2817.87	2846.68	2047.85	2549.6	3460.5	2481.38	0.480245	0.00242455	0.0471253	Bcan	3
ENSMUSG00000035064	1093.69	1072.89	1013.41	729.526	831.803	863.141	1059.99	808.157	0.391106	0.00242588	0.0471253	Eef2k	7
ENSMUSG00000030527	1915.53	2369.25	2079.19	1667.2	1392.99	1747.19	2121.32	1602.46	0.405224	0.00242993	0.0471253	Crtc3	7
ENSMUSG00000022324	2999.77	2531.42	2665	1808	2133.72	2306.69	2732.06	2082.8	0.391284	0.00243157	0.0471253	Matn2	15
ENSMUSG00000023348	1645.78	1648.39	1944.5	1371.3	1251.61	1408.7	1746.22	1343.87	0.378	0.00243226	0.0471253	Trip6	5
ENSMUSG00000036825	466.024	552.759	595.429	662.185	921.141	699.871	538.071	761.066	-0.501229	0.00243906	0.0472066	Ssx2ip	3
ENSMUSG00000018537	644.457	838.532	899.023	604.027	499.602	599.321	794.004	567.65	0.484947	0.00244679	0.0472856	Pcgf2	11
ENSMUSG00000074594	8.39683	6.92185	14.9659	37.7517	39.0314	21.9021	10.0949	32.8951	-1.71092	0.00244942	0.0472856	Wfdc9	2
ENSMUSG00000104960	544.745	465.741	695.915	388.74	353.017	437.046	568.8	392.935	0.533737	0.002451	0.0472856	Snhg8	3
ENSMUSG00000022479	124.903	209.633	136.831	243.856	241.127	269.794	157.122	251.592	-0.677074	0.00245999	0.04735	Vdr	15
ENSMUSG00000038046	163.738	132.504	151.797	211.205	287.965	204.088	149.346	234.419	-0.65313	0.00246151	0.04735	Mrm3	11
ENSMUSG00000048701	684.342	846.443	815.642	1024.4	1371.3	913.914	782.142	1103.2	-0.496817	0.00246219	0.04735	Ccdc6	10
ENSMUSG00000018848	1393.87	1503.03	1599.21	1783.51	2399.13	1839.78	1498.71	2007.47	-0.422167	0.00248993	0.0477812	Rars	11
ENSMUSG00000031539	116.506	131.515	100.485	174.474	223.78	165.261	116.169	187.838	-0.694038	0.00249172	0.0477812	Ap3m2	8
ENSMUSG00000031320	24103.1	25262.8	27477.4	19346.2	22221.9	19539.6	25614.4	20369.2	0.330524	0.00249254	0.0477812	Rps4x	X
ENSMUSG00000040118	1672.02	1797.7	1669.77	1435.58	1112.83	1362.91	1713.16	1303.77	0.394686	0.00251356	0.0481331	Cacna2d1	5
ENSMUSG00000097303	12.5953	21.7544	18.1729	34.6907	78.9302	32.8531	17.5075	48.8247	-1.48314	0.00253227	0.0484401	3110083C13Rik	14
ENSMUSG00000031935	1209.14	968.069	959.956	1309.07	1626.31	1308.15	1045.72	1414.51	-0.436369	0.0025435	0.0486034	Med17	9
ENSMUSG00000006333	19432.4	18089.7	21583	13935.5	13877.8	17602.3	19701.7	15138.5	0.380104	0.00256887	0.0489513	Rps9	7
ENSMUSG00000038860	442.933	525.071	353.837	688.713	640.982	558.503	440.614	629.4	-0.513672	0.00256895	0.0489513	Garnl3	2
ENSMUSG00000035726	2529.55	2587.78	2173.26	3095.64	3864.11	2792.52	2430.2	3250.75	-0.419887	0.00256983	0.0489513	Supt16	14
ENSMUSG00000030878	262.401	248.198	313.215	327.521	558.583	381.295	274.605	422.467	-0.623732	0.00257255	0.0489515	Cdr2	7
ENSMUSG00000106223	4.19842	4.94418	4.27597	15.3047	26.0209	19.911	4.47286	20.4122	-2.19189	0.00257779	0.0489997	2400006E01Rik	3
ENSMUSG00000027359	8.39683	14.8325	7.48295	21.4266	53.7766	27.8754	10.2374	34.3595	-1.74693	0.00259053	0.0491644	Slc27a2	2
ENSMUSG00000030538	376.808	329.282	432.942	437.716	610.625	596.334	379.677	548.225	-0.531374	0.00259697	0.0491644	Cib1	7
ENSMUSG00000028789	531.1	572.535	598.636	453.02	382.508	415.144	567.424	416.891	0.445651	0.00259827	0.0491644	Azin2	4
ENSMUSG00000076430	3.14881	9.88835	3.20698	16.3251	49.4398	12.9421	5.41471	26.2357	-2.27273	0.0025992	0.0491644	Hus1b	13
ENSMUSG00000078652	1498.83	1724.53	1777.74	1866.16	2591.69	2247.95	1667.03	2235.26	-0.42352	0.00260005	0.0491644	Psme3	11
ENSMUSG00000078350	1848.35	1530.72	1566.08	1272.33	1186.55	1338.02	1648.38	1265.64	0.381369	0.0026065	0.0492348	Smim1	4
ENSMUSG00000020733	262.401	300.606	408.355	435.675	563.787	446.006	323.787	481.823	-0.574917	0.00261178	0.0492831	Slc9a3r1	11
ENSMUSG00000058248	505.909	390.59	462.874	248.957	157.86	400.211	453.124	269.009	0.754046	0.00261777	0.0493446	Kcnh1	1
ENSMUSG00000021178	2751.01	2267.4	2766.55	3204.81	3819.01	3154.9	2594.99	3392.9	-0.38714	0.00262359	0.0494028	Psmc1	12
ENSMUSG00000087428	0	4.94418	2.13799	9.18284	33.8272	10.951	2.36072	17.987	-2.9205	0.00262863	0.0494398	Gm15017	X
ENSMUSG00000092390	2.09921	8.89952	1.06899	22.447	20.8168	19.911	4.02257	21.0582	-2.36913	0.00263108	0.0494398	Gm20541	17
ENSMUSG00000024990	29.3889	65.2631	52.3807	75.5034	124.901	99.5549	49.0109	99.9863	-1.02889	0.00263812	0.0494398	Rbp4	19
ENSMUSG00000031226	641.308	650.653	784.641	820.334	1243.8	889.026	692.201	984.387	-0.50915	0.00264514	0.0494398	Pbdc1	X
ENSMUSG00000027270	112.308	29.6651	48.1047	23.4673	31.2251	9.95549	63.3591	21.5493	1.54865	0.00264514	0.0494398	Lamp5	2
ENSMUSG00000086748	0	9.88835	4.27597	19.386	45.103	12.9421	4.72144	25.8104	-2.4433	0.00264616	0.0494398	Gm13261	2
ENSMUSG00000059810	1497.79	1606.86	1415.35	1213.16	1072.06	1216.56	1506.66	1167.26	0.368819	0.00264735	0.0494398	Rgs3	4
ENSMUSG00000028693	4250.9	4269.79	5005.03	5442.37	7243.36	5340.13	4508.57	6008.62	-0.414572	0.00264979	0.0494398	Nasp	4
ENSMUSG00000055093	301.236	188.867	323.905	167.332	111.89	202.097	271.336	160.439	0.759734	0.00265017	0.0494398	Gm8430	6
ENSMUSG00000072295	5.24802	19.7767	3.20698	30.6095	52.9092	23.8932	9.41057	35.804	-1.91914	0.00267096	0.0497763	C2cd6	1
ENSMUSG00000030556	147.994	185.901	191.35	242.835	361.691	227.981	175.082	277.502	-0.666452	0.00267655	0.049829	Lrrc28	7
ENSMUSG00000084184	17.8433	9.88835	12.8279	3.06095	0.867365	0.995549	13.5198	1.64129	3.06569	0.00267967	0.0498358	Gm13474	2
ENSMUSG00000026567	14.6945	18.7879	8.55195	27.5485	91.0733	21.9021	14.0114	46.8413	-1.74379	0.0026859	0.0499002	Adcy10	1
