# Supplementary material for: Splicing factor SRSF1 is essential for homing of precursor spermatogonial stem cells in mice
Source: eLife. 2024 Jan 25;12:RP89316. doi: 10.7554/eLife.89316 (PMC10945694; doi:10.7554/eLife.89316)
Supplement: Supplementary file 3. [file elife-89316-supp3.xlsx]

## Sheet: Sheet1
Supplementary File 3 AS events were analysed in cKO and Ctrl testes.
GeneID	geneSymbol	chr	type	IncFormLen	SkipFormLen	PValue	FDR	IncLevel1	IncLevel2	IncLevelDifference
ENSMUSG00000045672	Col27a1	4	A3SS	152	149	1.80195e-05	0.0332639	0.893,0.728,0.648	1.0,1.0,1.0	-0.244
ENSMUSG00000064179	Tnnt1	7	A3SS	152	149	2.78787e-08	0.000102928	0.329,0.662,0.927	0.0,0.0,0.0	0.639
ENSMUSG00000014767	Tbp	17	A5SS	304	149	5.48476e-09	5.94273e-06	0.0,0.076,0.0	0.318,0.51,0.62	-0.457
ENSMUSG00000051331	Cacna1c	6	A5SS	323	149	2.58682e-14	5.60564e-11	1.0,1.0,1.0	0.187,0.0,0.0	0.938
ENSMUSG00000060985	Tdrd5	1	A5SS	380	149	2.42418e-05	0.013133	0.541,0.0,0.44	0.836,0.897,1.0	-0.584
ENSMUSG00000073125	Xlr3b	X	A5SS	164	149	1.17661e-05	0.00849906	1.0,1.0,1.0	0.0,0.0,1.0	0.667
ENSMUSG00000028478	Clta	4	MXE	203	185	2.85e-05	0.00966027	1.0,0.477,1.0	0.0,0.313,0.0	0.721
ENSMUSG00000051331	Cacna1c	6	MXE	233	182	2.03e-06	0.0012339	1.0,1.0,1.0	0.0,0.0,1.0	0.667
ENSMUSG00000007279	Scube2	7	MXE	233	254	8.86e-12	1.35e-08	1.0,1.0,1.0	0.154,0.466,0.353	0.676
ENSMUSG00000033720	Sfxn5	6	MXE	240	265	0.000118169	0.0327222	0.0,0.0,0.0	0.424,0.408,0.321	-0.384
ENSMUSG00000014353	Tmem87b	2	MXE	221	221	0.000157636	0.0369353	0.518,0.549,0.63	0.357,0.301,0.333	0.235
ENSMUSG00000048402	Gli2	1	MXE	316	335	1.06e-05	0.00460239	0.096,0.0,0.0	0.597,0.414,0.298	-0.404
ENSMUSG00000041670	Rims1	1	MXE	230	218	0	0	0.0,0.0,0.0	1.0,0.895,1.0	-0.965
ENSMUSG00000028256	Odf2l	3	MXE	227	308	1.3e-07	0.000131748	0.0,0.0,0.0	1.0,0.352,1.0	-0.784
ENSMUSG00000022938	Fam3b	16	MXE	273	208	3.07e-06	0.00155949	1.0,1.0,0.873	0.087,0.588,0.696	0.501
ENSMUSG00000068758	Il3ra	14	MXE	268	179	0.000149044	0.0369353	0.958,1.0,0.923	0.829,0.715,0.736	0.2
ENSMUSG00000008658	Rbfox1	16	MXE	189	214	0.000102624	0.0312593	0.0,0.773,0.0	1.0,0.85,1.0	-0.692
ENSMUSG00000030846	Tial1	7	MXE	218	217	1.9e-05	0.00722361	0.033,0.142,0.025	0.326,0.241,0.27	-0.212
ENSMUSG00000039997	Ifi203	1	MXE	293	1391	2.08e-07	0.000158204	0.133,0.0,0.0	0.783,0.177,0.564	-0.464
ENSMUSG00000019320	Noxo1	17	RI	389	149	1.67684e-05	0.00859939	1.0,1.0,0.365	0.0,0.354,0.296	0.572
ENSMUSG00000044551	9930012K11Rik	14	RI	288	149	6.94083e-06	0.00755878	0.376,0.368,0.376	0.129,0.045,0.0	0.315
ENSMUSG00000041679	Lrrc29	8	RI	307	149	9.12295e-06	0.00755878	0.421,0.108,0.66	0.708,1.0,1.0	-0.506
ENSMUSG00000027804	Ppid	3	RI	2525	149	1.20905e-05	0.00755878	0.329,0.352,0.257	0.163,0.204,0.152	0.14
ENSMUSG00000034928	Rnf44	13	RI	336	149	2.1087e-05	0.00926925	0.578,1.0,1.0	0.372,0.331,0.307	0.523
ENSMUSG00000026754	Golga1	2	RI	600	149	2.98829e-05	0.0114937	1.0,0.897,1.0	0.546,0.695,0.851	0.268
ENSMUSG00000029032	Arhgef16	4	RI	1028	149	6.86531e-05	0.0234717	1.0,1.0,1.0	0.0,0.367,1.0	0.544
ENSMUSG00000078485	Plekhn1	4	RI	2693	149	1.22827e-05	0.00755878	1.0,1.0,1.0	0.529,0.583,0.81	0.359
ENSMUSG00000020059	Sycp3	10	RI	273	149	0.000107583	0.0331032	0.766,0.577,0.947	0.443,0.263,0.392	0.397
ENSMUSG00000070000	Fcho1	8	RI	388	149	7.28322e-06	0.00755878	0.248,0.133,0.227	0.578,0.633,0.569	-0.391
ENSMUSG00000024985	Tcf7l2	19	SE	200	149	1.55e-05	0.00596983	0.598,0.516,0.701	1.0,1.0,0.882	-0.356
ENSMUSG00000024743	Syt7	19	SE	377	149	0	0	1.0,1.0,1.0	0.165,0.0,0.145	0.897
ENSMUSG00000060450	Rnf14	18	SE	225	149	1.48e-07	0.000173126	0.0,0.0,0.0	1.0,1.0,0.498	-0.833
ENSMUSG00000024044	Epb41l3	17	SE	224	149	7.87e-09	1.45e-05	1.0,0.842,1.0	0.25,0.195,0.0	0.799
ENSMUSG00000025735	Rhbdl1	17	SE	323	149	8.71e-05	0.0236294	0.639,0.356,0.504	1.0,0.822,0.866	-0.396
ENSMUSG00000025735	Rhbdl1	17	SE	311	149	9.61e-05	0.0251385	0.736,0.564,0.678	1.0,0.888,0.913	-0.274
ENSMUSG00000014767	Tbp	17	SE	353	149	0.000224623	0.0499288	0.0,0.013,0.0	0.11,0.13,0.099	-0.109
ENSMUSG00000014767	Tbp	17	SE	195	149	1.2e-06	0.00100643	0.113,0.0,0.0	0.256,0.344,0.505	-0.331
ENSMUSG00000022791	Tnk2	16	SE	245	149	1.74e-08	2.71e-05	0.93,0.86,0.792	1.0,1.0,0.976	-0.131
ENSMUSG00000022556	Hsf1	15	SE	286	149	4.04e-05	0.0131374	0.973,0.978,0.972	0.83,0.803,0.845	0.148
ENSMUSG00000022378	Fam49b	15	SE	232	149	5.93e-08	7.97e-05	0.0,0.097,0.0	0.342,0.264,0.252	-0.254
ENSMUSG00000022378	Fam49b	15	SE	232	149	8.98e-05	0.0241361	0.005,0.029,0.0	0.093,0.115,0.106	-0.093
ENSMUSG00000024381	Bin1	18	SE	278	149	4.89e-06	0.0026782	0.115,0.235,0.162	0.339,0.479,0.42	-0.242
ENSMUSG00000022197	Pdzd2	15	SE	305	149	3.16e-06	0.0018668	1.0,1.0,1.0	0.661,0.0,0.268	0.69
ENSMUSG00000041481	Serpina3g	12	SE	241	149	9.47e-14	4.67e-10	0.0,0.0,0.481	1.0,1.0,1.0	-0.84
ENSMUSG00000054894	Atp5s	12	SE	249	149	9.44e-05	0.0249299	0.467,0.295,0.318	0.725,0.7,0.749	-0.365
ENSMUSG00000022607	Ptk2	15	SE	170	149	1.16e-06	0.00100643	0.012,0.02,0.043	0.117,0.236,0.178	-0.152
ENSMUSG00000079179	Rab10os	12	SE	325	149	5.32e-10	1.35e-06	0.957,1.0,1.0	0.468,0.777,0.612	0.367
ENSMUSG00000033102	Cdc14b	13	SE	215	149	0.000149783	0.0365953	0.055,0.131,0.148	0.409,0.4,0.291	-0.255
ENSMUSG00000021458	2010111I01Rik	13	SE	338	149	3.98e-09	8.4e-06	1.0,1.0,1.0	0.469,0.128,0.306	0.699
ENSMUSG00000020814	Mxra7	11	SE	237	149	2.7e-05	0.00938663	0.812,0.711,0.891	0.322,0.575,0.416	0.367
ENSMUSG00000001036	Epn2	11	SE	284	149	1.51e-06	0.00112663	1.0,0.512,1.0	0.0,0.208,0.208	0.699
ENSMUSG00000020389	Cdkl3	11	SE	223	149	7.6e-05	0.0211936	1.0,0.501,1.0	0.539,0.334,0.401	0.409
ENSMUSG00000020287	Mpg	11	SE	519	149	2.31e-07	0.000252676	0.28,0.541,0.203	0.801,0.884,1.0	-0.554
ENSMUSG00000049800	Sertad2	11	SE	234	149	3.8e-14	2.24e-10	0.0,0.0,0.0	1.0,1.0,1.0	-1
ENSMUSG00000038708	Golga4	9	SE	248	149	4.63e-06	0.00258329	0.3,0.462,0.26	0.029,0.059,0.082	0.284
ENSMUSG00000033419	Snap91	9	SE	233	149	1.44e-09	3.28e-06	0.561,0.242,0.299	1.0,1.0,1.0	-0.633
ENSMUSG00000032076	Cadm1	9	SE	182	149	0.000112022	0.0287976	0.165,0.296,0.347	0.466,0.588,0.504	-0.25
ENSMUSG00000032386	Trip4	9	SE	301	149	1.37e-06	0.00106503	1.0,1.0,0.271	0.0,0.331,0.0	0.647
ENSMUSG00000032034	Kcnj5	9	SE	452	149	1.82e-05	0.00673405	1.0,0.569,1.0	0.248,0.0,0.622	0.566
ENSMUSG00000021843	Ktn1	14	SE	218	149	0.000193201	0.0446218	0.457,0.478,0.426	0.724,0.595,0.694	-0.217
ENSMUSG00000039599	Fam149b	14	SE	266	149	2.56e-12	1.08e-08	0.0,0.123,0.0	1.0,1.0,1.0	-0.959
ENSMUSG00000021012	Zc3h14	12	SE	309	149	9.89e-06	0.00436287	0.493,0.466,0.423	0.633,0.666,0.63	-0.182
ENSMUSG00000003824	Syce2	8	SE	303	149	1.17e-05	0.00487266	0.337,0.409,0.442	0.555,0.688,0.585	-0.213
ENSMUSG00000028634	Hivep3	4	SE	262	149	0.000190173	0.0442684	0.416,0.245,0.666	0.603,1.0,1.0	-0.425
ENSMUSG00000067367	Lyar	5	SE	273	149	1.86e-05	0.0068065	0.163,0.0,0.0	0.302,0.308,0.148	-0.198
ENSMUSG00000066113	Adamtsl1	4	SE	200	149	5.1e-06	0.00274293	0.0,0.0,0.0	0.598,1.0,1.0	-0.866
ENSMUSG00000008575	Nfib	4	SE	238	149	2.42e-05	0.0086321	0.065,0.0,0.0	0.556,0.594,0.135	-0.407
ENSMUSG00000054752	Fsd1l	4	SE	172	149	2e-06	0.00131725	0.0,0.634,0.0	1.0,1.0,1.0	-0.789
ENSMUSG00000053279	Aldh1a1	19	SE	347	149	1.29e-05	0.00514016	1.0,1.0,1.0	0.417,0.256,0.75	0.526
ENSMUSG00000069755	Zfp125	12	SE	232	149	0	0	0.0,0.097,0.0	1.0,1.0,1.0	-0.968
ENSMUSG00000029328	Hnrnpdl	5	SE	320	149	1.48e-05	0.00583263	0.9,0.917,0.889	0.988,0.99,0.977	-0.083
ENSMUSG00000068917	Clk2	3	SE	237	149	1.28e-05	0.00514016	0.672,0.667,0.642	0.839,0.886,0.918	-0.221
ENSMUSG00000068917	Clk2	3	SE	234	149	1.53e-06	0.00112663	0.564,0.601,0.619	0.802,0.869,0.906	-0.264
ENSMUSG00000035401	Emsy	7	SE	485	149	0.000103111	0.0267391	0.819,1.0,1.0	0.673,0.818,0.646	0.227
ENSMUSG00000021280	Exoc3l4	12	SE	254	149	5.51e-07	0.000542506	0.128,0.089,0.0	1.0,0.518,1.0	-0.767
ENSMUSG00000021357	Exoc2	13	SE	208	149	5e-08	7.17e-05	0.0,0.014,0.0	0.155,0.217,0.237	-0.198
ENSMUSG00000040928	S100pbp	4	SE	266	149	9.33e-05	0.0248384	0.766,0.728,0.883	1.0,0.956,1.0	-0.193
ENSMUSG00000030629	Zfand6	7	SE	310	149	0.000195813	0.0448745	0.852,1.0,1.0	0.325,0.325,0.684	0.506
ENSMUSG00000030314	Atg7	6	SE	270	149	3.75e-05	0.0123129	0.0,0.0,0.0	0.0,1.0,1.0	-0.667
ENSMUSG00000031458	Coprs	8	SE	365	149	0.000130605	0.0324459	0.62,0.569,0.786	0.936,0.891,0.862	-0.238
ENSMUSG00000041199	Rpusd1	17	SE	338	149	1.96e-06	0.00131725	1.0,1.0,1.0	0.897,0.767,0.806	0.177
ENSMUSG00000004947	Dtx2	5	SE	287	149	0.000217131	0.0486291	0.63,0.72,0.801	0.433,0.345,0.558	0.272
ENSMUSG00000078515	Ddi2	4	SE	211	149	1.03e-05	0.00439578	1.0,1.0,0.973	0.393,0.713,0.874	0.331
ENSMUSG00000078515	Ddi2	4	SE	211	149	6.19e-05	0.018124	0.962,1.0,1.0	0.0,0.463,0.87	0.543
ENSMUSG00000078515	Ddi2	4	SE	339	149	8.24e-05	0.0227755	0.966,1.0,1.0	0.796,0.694,0.951	0.175
ENSMUSG00000026672	Optn	2	SE	352	149	3.53e-05	0.0117235	1.0,1.0,1.0	0.714,0.894,0.691	0.234
ENSMUSG00000026672	Optn	2	SE	326	149	5.48e-05	0.0165354	1.0,1.0,1.0	0.794,0.809,0.814	0.194
ENSMUSG00000024266	Adad2	8	SE	290	149	2.02e-05	0.00728079	1.0,1.0,1.0	0.698,0.629,0.814	0.286
ENSMUSG00000026723	Trdmt1	2	SE	259	149	1.76e-05	0.00658206	0.955,1.0,1.0	0.817,0.788,0.771	0.193
ENSMUSG00000032966	Fkbp1a	2	SE	240	149	3.43e-05	0.011537	0.037,0.094,0.0	0.276,0.261,0.271	-0.226
ENSMUSG00000006315	Tmem147	7	SE	219	149	4.55e-05	0.0143212	0.731,0.689,0.362	0.731,1.0,1.0	-0.316
ENSMUSG00000051985	Igfn1	1	SE	4634	149	6.76e-05	0.0192277	1.0,1.0,1.0	0.088,0.114,1.0	0.599
ENSMUSG00000028483	Snapc3	4	SE	234	149	6.61e-05	0.0189717	0.813,0.74,0.925	1.0,0.954,0.988	-0.155
ENSMUSG00000053333	Dis3l2	1	SE	191	149	1.22e-06	0.00100643	0.084,0.0,0.0	0.245,0.324,0.247	-0.244
ENSMUSG00000099913	Gm28551	1	SE	346	149	6.81e-06	0.00334459	0.365,0.564,0.528	1.0,1.0,1.0	-0.514
ENSMUSG00000026219	Trip12	1	SE	275	149	0.000174386	0.0415756	0.234,0.142,0.0	0.359,0.306,0.368	-0.219
ENSMUSG00000024566	Atp9b	18	SE	226	149	5.09e-08	7.17e-05	0.928,1.0,0.896	0.755,0.654,0.446	0.323
ENSMUSG00000087177	E130307A14Rik	10	SE	216	149	1.08e-07	0.000139338	1.0,1.0,0.805	0.315,0.133,0.58	0.592
ENSMUSG00000087177	E130307A14Rik	10	SE	352	149	3.9e-06	0.00226141	1.0,1.0,0.899	0.76,0.669,0.798	0.224
ENSMUSG00000029769	Ccdc136	6	SE	335	149	4.33e-05	0.0137614	0.0,0.727,0.527	1.0,1.0,0.83	-0.525
ENSMUSG00000029769	Ccdc136	6	SE	431	149	2.39e-11	7.07e-08	0.195,0.28,0.257	1.0,0.818,1.0	-0.695
ENSMUSG00000029769	Ccdc136	6	SE	428	149	8.36e-12	3.09e-08	1.0,1.0,1.0	0.723,0.474,0.701	0.367
ENSMUSG00000051285	Pcmtd1	1	SE	341	149	4.19e-05	0.0134584	0.561,0.476,0.466	0.341,0.132,0.256	0.258
ENSMUSG00000022995	Enah	1	SE	212	149	1.56e-06	0.00112663	0.014,0.05,0.021	0.097,0.271,0.162	-0.148
ENSMUSG00000028919	Arhgef19	4	SE	298	149	1e-11	3.28e-08	1.0,0.765,1.0	0.077,0.152,0.36	0.725
ENSMUSG00000028919	Arhgef19	4	SE	256	149	8.71e-05	0.0236294	1.0,0.368,1.0	0.185,0.143,0.068	0.657
ENSMUSG00000049606	Zfp644	5	SE	712	149	1.78e-15	1.75e-11	1.0,1.0,1.0	0.334,0.255,0.611	0.6
ENSMUSG00000049606	Zfp644	5	SE	206	149	0.000198623	0.0451683	0.685,1.0,1.0	1.0,0.083,0.126	0.492
ENSMUSG00000049606	Zfp644	5	SE	206	149	3.33e-15	2.46e-11	1.0,1.0,1.0	0.126,0.062,0.52	0.764
ENSMUSG00000052373	Mpp3	11	SE	170	149	1.36e-08	2.23e-05	0.549,0.513,0.672	0.141,0.137,0.0	0.485
ENSMUSG00000040728	Esrp1	4	SE	259	149	0.000135927	0.0334867	0.0,0.071,0.0	0.333,0.165,0.087	-0.171
ENSMUSG00000023044	Csad	15	SE	239	149	6.43e-05	0.0186289	0.903,0.652,0.804	1.0,0.961,1.0	-0.201
ENSMUSG00000023044	Csad	15	SE	201	149	1.54e-05	0.00596983	0.863,0.608,0.797	1.0,0.942,1.0	-0.225
ENSMUSG00000028693	Nasp	4	SE	1124	149	6.06e-09	1.19e-05	0.359,0.396,0.381	0.538,0.59,0.57	-0.187
ENSMUSG00000041757	Plekha6	1	SE	295	149	2.64e-06	0.00166284	0.202,0.0,0.0	0.735,0.414,1.0	-0.649
ENSMUSG00000021947	Cryl1	14	SE	254	149	6.89e-06	0.00334459	1.0,1.0,0.37	0.0,0.0,0.37	0.667
ENSMUSG00000039262	Prrc2b	2	SE	231	149	5.9e-05	0.0174426	0.222,0.443,0.241	0.537,0.576,0.726	-0.311
ENSMUSG00000058402	Zfp420	7	SE	202	149	6.9e-06	0.00334459	0.0,0.0,0.425	0.633,1.0,0.596	-0.601
ENSMUSG00000030041	M1ap	6	SE	290	149	6.68e-07	0.000637492	1.0,1.0,1.0	0.855,0.637,0.782	0.242
ENSMUSG00000031389	Arhgap4	X	SE	212	149	2.01e-06	0.00131725	0.484,0.0,0.26	1.0,1.0,0.738	-0.665
ENSMUSG00000032582	Rbm6	9	SE	219	149	1.21e-05	0.00495998	1.0,0.576,0.405	0.095,0.036,0.026	0.608
ENSMUSG00000074899	Sptbn5	2	SE	232	149	1.52e-07	0.000173126	0.0,0.391,0.0	0.72,1.0,0.562	-0.63
ENSMUSG00000004043	Stat5a	11	SE	201	149	5.12e-05	0.0157775	0.763,0.426,0.553	1.0,0.952,0.87	-0.36
ENSMUSG00000043962	Thrap3	4	SE	845	149	5.47e-10	1.35e-06	0.994,0.954,0.98	0.735,0.693,0.893	0.202
ENSMUSG00000068758	Il3ra	14	SE	179	149	9.35e-06	0.00418636	0.143,0.0,0.454	0.4,1.0,1.0	-0.601
ENSMUSG00000013973	Dedd	1	SE	182	149	1.01e-05	0.00438206	0.539,0.353,0.399	1.0,1.0,0.724	-0.478
ENSMUSG00000014592	Camta1	4	SE	170	149	2.45e-06	0.00157552	0.0,0.0,0.305	1.0,0.637,0.305	-0.546
ENSMUSG00000019790	Stxbp5	10	SE	197	149	0.000156459	0.037913	1.0,0.532,1.0	0.602,0.201,0.0	0.576
ENSMUSG00000034164	Emid1	11	SE	240	149	0.00012325	0.0310142	0.134,0.383,0.0	0.262,0.383,0.347	-0.158
ENSMUSG00000037605	Adgrl3	5	SE	353	149	2.86e-06	0.0017273	0.655,0.53,0.747	1.0,1.0,1.0	-0.356
ENSMUSG00000006262	Mob1b	5	SE	258	149	0.000162681	0.0391002	0.634,0.464,0.722	1.0,1.0,1.0	-0.393
ENSMUSG00000029298	Gbp9	5	SE	252	149	2.91e-05	0.0100179	0.639,0.542,0.825	0.0,1.0,0.0	0.335
ENSMUSG00000033209	Ttc28	5	SE	173	149	1.23e-06	0.00100643	0.223,1.0,1.0	0.0,0.0,0.0	0.741
ENSMUSG00000028573	Fggy	4	SE	211	149	5.95e-06	0.00314168	1.0,1.0,0.931	0.712,0.647,0.647	0.308
ENSMUSG00000057337	Chst3	10	SE	302	149	0.000213644	0.0482135	1.0,1.0,1.0	0.152,1.0,0.33	0.506
ENSMUSG00000036555	Iqce	5	SE	284	149	7.46e-06	0.00350078	0.677,0.655,0.84	1.0,1.0,1.0	-0.276
ENSMUSG00000066640	Fbxl18	5	SE	1693	149	5.31e-05	0.016171	0.937,1.0,0.893	0.656,0.655,0.837	0.227
ENSMUSG00000007812	Zfp655	5	SE	235	149	1.09e-05	0.00459762	1.0,1.0,1.0	0.727,0.769,0.538	0.322
ENSMUSG00000029823	Luc7l2	6	SE	250	149	0.00018286	0.043247	1.0,1.0,1.0	0.749,0.641,0.573	0.346
ENSMUSG00000029823	Luc7l2	6	SE	217	149	8.69e-09	1.51e-05	0.089,0.407,0.654	1.0,1.0,1.0	-0.617
ENSMUSG00000036879	Phkb	8	SE	258	149	1.32e-06	0.00105331	1.0,0.882,1.0	0.743,0.536,0.548	0.352
ENSMUSG00000036879	Phkb	8	SE	241	149	1.66e-06	0.00116709	1.0,0.867,1.0	0.724,0.382,0.587	0.391
ENSMUSG00000039678	Tbc1d13	2	SE	293	149	9.02e-06	0.00410192	1.0,1.0,0.869	0.484,0.604,0.921	0.287
ENSMUSG00000022487	Gtsf1	15	SE	230	149	0.000121582	0.0309856	0.463,1.0,1.0	0.257,0.162,0.404	0.547
ENSMUSG00000031864	Ints10	8	SE	227	149	5.73e-05	0.0170999	1.0,0.868,1.0	0.663,0.766,0.441	0.333
ENSMUSG00000032254	Kif23	9	SE	461	149	4.18e-06	0.00237758	0.481,0.543,0.506	0.738,0.671,0.66	-0.18
ENSMUSG00000008140	Emc10	7	SE	236	149	0.000123792	0.0310142	0.557,0.503,0.508	0.374,0.301,0.389	0.168
ENSMUSG00000040189	Ccdc114	7	SE	228	149	3.35e-05	0.0113875	1.0,1.0,0.907	0.753,0.805,0.649	0.233
ENSMUSG00000040189	Ccdc114	7	SE	224	149	8.97e-07	0.000828289	1.0,1.0,0.823	0.624,0.608,0.1	0.497
ENSMUSG00000075555	Gm10863	15	SE	208	149	1.31e-07	0.000161571	0.571,0.648,0.626	0.917,1.0,1.0	-0.357
ENSMUSG00000029267	Mtf2	5	SE	262	149	4.8e-07	0.000503017	1.0,1.0,1.0	0.363,0.645,0.561	0.477
ENSMUSG00000029267	Mtf2	5	SE	297	149	8.76e-06	0.00404664	1.0,1.0,1.0	0.501,0.707,0.681	0.37
ENSMUSG00000062797	Hikeshi	7	SE	387	149	6.87e-06	0.00334459	0.688,0.682,0.623	0.786,0.843,0.883	-0.173
ENSMUSG00000006310	Zbtb32	7	SE	218	149	0.000188349	0.0441918	0.406,0.0,0.0	0.421,0.381,0.732	-0.376
ENSMUSG00000030849	Fgfr2	7	SE	416	149	7.25e-05	0.0204087	0.642,0.668,0.617	0.0,0.207,0.417	0.434
ENSMUSG00000038695	Josd2	7	SE	261	149	2.59e-05	0.00912711	0.624,0.826,0.66	0.268,0.363,0.311	0.389
ENSMUSG00000030846	Tial1	7	SE	218	149	7.25e-06	0.00345565	0.054,0.339,0.05	0.506,0.785,0.533	-0.46
ENSMUSG00000031808	Slc27a1	8	SE	256	149	4.94e-05	0.0153697	0.088,0.085,0.026	0.431,0.256,0.327	-0.272
ENSMUSG00000052446	Zfp961	8	SE	272	149	2.76e-06	0.00170047	1.0,0.751,1.0	0.512,0.354,0.558	0.442
ENSMUSG00000052446	Zfp961	8	SE	276	149	4.93e-07	0.000503017	1.0,0.829,1.0	0.612,0.674,0.654	0.296
ENSMUSG00000052446	Zfp961	8	SE	346	149	6.25e-06	0.00324134	1.0,0.66,1.0	0.418,0.334,0.498	0.47
ENSMUSG00000020027	Socs2	10	SE	253	149	1.71e-05	0.0064653	0.078,0.0,0.0	0.32,0.371,0.841	-0.485
