# Supplementary material for: Splicing factor SRSF1 is essential for homing of precursor spermatogonial stem cells in mice
Source: eLife. 2024 Jan 25;12:RP89316. doi: 10.7554/eLife.89316 (PMC10945694; doi:10.7554/eLife.89316)
Supplement: Supplementary file 4. [file elife-89316-supp4.xlsx]

## Sheet: Sheet1
Supplementary File 4 The SRSF1 interacting proteins were displayed through IP-MS.
Protein	ScoreRep1	ScoreRep2	Protein	ScoreRep1	ScoreRep2	Protein	ScoreRep1	ScoreRep2
SRSF1	2882	2396	GM10709	21	21	MME	22	21
IGKV4-91	158	150	DAZAP1	21	41	GEMIN4	51	121
IGHV1-43	327	347	IDH2	35	29	DHX38	40	18
IGKV19-93	31	31	XAB2	36	36	F830045P16RIK	36	35
SRRM2	59	53	SPATS2L	26	23	KIF2B	25	16
L3MBTL4	20	20	COL12A1	14	22	CCAR1	34	106
PCDHGA7	16	15	ZC3H13	28	28	LRRC45	15	16
CYTH1	20	20	ACIN1	144	171	SLC25A1	16	15
PTPRF	26	26	GM9493	119	68	TWF1	24	24
DOCK7	25	25	GIGYF2	16	17	WDR7	20	29
GEMIN5	291	361	GM9825	31	30	44987	17	17
MED12	15	27	SNRPA1	25	18	PRPF3	39	54
AQR	15	24	PAXBP1	21	17	DDX50	36	31
PPIG	99	65	SF3B6	43	55	COX6C	17	15
CWC22	31	21	CDC42	21	16	GEMIN2	83	29
NRK	44	28	SNRPE	46	34	PRPF4	43	52
TBX1	24	20	ARF5	55	78	CDC40	20	37
SF3A2	23	18	RBM15	102	71	CRIP2	32	41
HADHB	19	21	SRSF10	204	256	TFIP11	56	50
SAP18	38	84	USP39	18	15	DDX20	54	67
RPL5	243	145	LUC7L3	101	84	GOLGA5	14	15
DDX23	32	30	PDLIM4	14	22	SART1	85	91
GYS1	16	16
