# Supplementary material for: Splicing factor SRSF1 is essential for homing of precursor spermatogonial stem cells in mice
Source: eLife. 2024 Jan 25;12:RP89316. doi: 10.7554/eLife.89316 (PMC10945694; doi:10.7554/eLife.89316)
Supplement: Supplementary file 5. [file elife-89316-supp5.xlsx]

## Sheet: Sheet1
Supplementary File 5 Primer sequences were used in this study.
Target	Sequence(5' to 3')	Application
Srsf1-GT-F	ACTAATGTGGGAAGAATGGC	Genotyping
Srsf1-GT-FKO	TTCGCCTTCGTTGAGTTC
Srsf1-GT-R	AAACTATTGCTCCCATCTGC
Vasa-Cre-MutF	CACGTGCAGCCGTTTAAGCCGCGT
Vasa-Cre-MutR	TTCCCATTCTAAACAACACCCTGAA
Vasa-Cre-WtF	CTAGGCCACAGAATTGAAAGATCT
Vasa-Cre-WtR	GTAGGTGGAAATTCTAGCATCATCC
Srsf1-F	AGGAGGATTGAGGAGGATCAG	RT-qPCR & RIP-qPCR
Srsf1-R	CGCTCCATGAATCCTGGTAA
Gapdh-F	GGGTCCCAGCTTAGGTTCAT
Gapdh-R	CCCAATACGGCCAAATCCGT
Gfra1-F	AGCCACTCTGTACTTCGTGC
Gfra1-R	TCAGTGTGCGGTACTTGGTG
Pou5f1-F	GAGAACCGTGTGAGGTGGAG
Pou5f1-R	GATCTTTTGCCCTTCTGGCG
Plzf-F	GGAGACGCACTACAGGGTTC
Plzf-R	GGTACACTGGTATGGCGAGG
Nanos3-F	GTCTACTGCTACACCACCCG
Nanos3-R	CTGCCACTTTTGGAACCTGC
Dnd1-F	CTTAAACCGCCGAGCGTTAC
Dnd1-R	GAGGCGTGACTGACCTTCTA
Stra8-F	ACCGTGGTGGCCTTAAAGATTA
Stra8-R	TGAAGAGCCCTACCAGGGTG
Taf4b-F	CGACAATCCAACTACCGGCT
Taf4b-R	CTTGTGGTCTTGGCTCCTGT
Sall4-F	AACTTCTCGTCTGCCAGTGC
Sall4-R	GCGGGCGGAGTTATTGTTG
Tial1-F	TCGGGGCTGACAGATCAACTT
Tial1-R	GTTCACAGAGACAATGGCGTG
Tial1-seF	TTGTTGGGGATTTGAGTCCAGA	RT-PCR
Tial1-seR	TCTATCATCATTTTGGAGTTTGGGC
SRSF1-OEF	GTGGCTCGAGCAGGCGCGCCATGTCGGGAGGTGGTGTGAT	Plasmid construction
SRSF1-OER	GGGCCCTCTAGATTAATTAATTATGTACGAGAGCGAGATC
SRSF1-RRM1F	GCCCGGCGGGGAACAACGACGGCCGCGGGACCGGCCGAGG
SRSF1-RRM1R	CCTCGGCCGGTCCCGCGGCCGTCGTTGTTCCCCGCCGGGC
SRSF1-RRM2F	CGCCGTCCAGGCGGTCCGAGGGGCCCAGAAGTCCAAGTTA
SRSF1-RRM2R	TAACTTGGACTTCTGGGCCCCTCGGACCGCCTGGACGGCG
SRSF1-RSR	GGGCCCTCTAGATTAATTAATTATGTGGGCCCATCAACTTTAACCC
SRSF10-F	GTGGCTCGAGCAGGCGCGCCATGTCCCGATACCTGCGCCC
SRSF10-R	GGGCCCTCTAGATTAATTAATCAGATCTTTCTTGAAGTGT
SART1-F	GTGGCTCGAGCAGGCGCGCCATGGGGTCGTCAAAGAAGCA
SART1-R	GGGCCCTCTAGATTAATTAATCATTTGGTGATGGTGTTCG
RBM15-F	GTGGCTCGAGCAGGCGCGCCATGAGGTCTGCGGGGCGGGA
RBM15-R	GGGCCCTCTAGATTAATTAATCATCCGCTGTTCACCAGTT
