# Supplementary material for: Splicing factor SRSF1 is essential for homing of precursor spermatogonial stem cells in mice
Source: eLife. 2024 Jan 25;12:RP89316. doi: 10.7554/eLife.89316 (PMC10945694; doi:10.7554/eLife.89316)
Supplement: Supplementary file 6. [file elife-89316-supp6.xlsx]

## Sheet: sheet1
Supplementary File 6 Antibodies were used in this study.
Name	Cat.NO.	RRID	Source	Company	Dilution
DDX4	ab13840	AB_443012	Rabbit polyclonal	abcam	IF, 1: 800
DDX4	ab27591	AB_11139638	Mouse monoclonal	abcam	IF, 1: 800
ACTB	81115-1-RR	AB_2923704	Rabbit monoclonal	Proteintech	WB, 1: 20000
SRSF1	12929-2-AP	AB_2187211	Rabbit polyclonal	Proteintech	WB, 1:1000 IF, 1:200
SRSF1	sc-33652	AB_628248	Mouse monoclonal	Santa Cruz	IF, 1:500
γH2AX (AlexaFluor® 555)	05-636-AF555	AB_2796704	Mouse monoclonal	Millipore	IF, 1:800
HA	M20003	AB_2864345	Mouse monoclonal	Abmart	WB, 1: 5000
FLAG	bsm-33346M	AB_3083063	Mouse monoclonal	Bioss	WB, 1: 5000
PLZF	sc-28319	AB_2218941	Mouse monoclonal	Santa Cruz	IF, 1: 200
SOX9 (AlexaFluor® 555)	AB5535-AF555	AB_2239761	Rabbit polyclonal	Millipore	IF, 1: 100
TIAL1/TIAR	66907-1-Ig	AB_2882234	Mouse monoclonal	Proteintech	IF, 1: 200
SRSF10	bs-13229R	AB_3083061	Rabbit polyclonal	Bioss	WB, 1: 1000
SART1	ab181867	AB_3083060	Rabbit monoclonal	abcam	WB, 1: 20000
BCAS2	PA2466	AB_3083059	Rabbit polyclonal	Abmart	IF, 1:400
FOXO1	2880	AB_2106495	Rabbit monoclonal	CST	IHC, 1:200
RBM15	bs-12402R	AB_3083062	Rabbit polyclonal	Bioss	WB, 1: 1000
TRA98	ab82527	AB_1659152	Rat monoclonal	abcam	IF, 1:400
GAR-488	A11034	AB_2758380	Goat polyclonal	Life Technologies	IF, 1: 500
GAM-594	A32742	AB_2762825	Goat polyclonal	Life Technologies	IF, 1: 500
DAR-594	A-21207	AB_141637	Donkey polyclonal	Life Technologies	IF, 1: 500
DAM-488	A-21202	AB_141607	Donkey polyclonal	Life Technologies	IF, 1: 500
GAR-HRP	7074P2	AB_2099233	Goat polyclonal	CST	WB, 1: 2000
GAM-HRP	7076P2	AB_330924	Goat polyclonal	CST	WB, 1: 2000
